# Supplementary material for: Dynamic changes in brain lateralization correlate with human cognitive performance
Source: PLoS Biol. 2022 Mar 17;20(3):e3001560. doi: 10.1371/journal.pbio.3001560 (PMC8929635; doi:10.1371/journal.pbio.3001560)
Supplement: S1 Data — (XLSX) [file pbio.3001560.s019.xlsx]

## Sheet: figure2-A
subID	R_V1	R_MST	R_V6	R_V2	R_V3	R_V4	R_V8	R_4	R_3b	R_FEF	R_PEF	R_55b	R_V3A	R_RSC	R_POS2	R_V7	R_IPS1	R_FFC	R_V3B	R_LO1	R_LO2	R_PIT	R_MT	R_A1	R_PSL	R_SFL	R_PCV	R_STV	R_7Pm	R_7m	R_POS1	R_23d	R_v23ab	R_d23ab	R_31pv	R_5m	R_5mv	R_23c	R_5L	R_24dd	R_24dv	R_7AL	R_SCEF	R_6ma	R_7Am	R_7PL	R_7PC	R_LIPv	R_VIP
100206	-0.0431385	-0.0271314	-0.0638691	-0.0740981	-0.0534224	-0.00728044	-0.0251749	-0.0994539	-0.0960732	-0.0343321	-0.122693	-0.0720316	-0.0779728	0.0250118	-0.0510469	-0.0434196	-0.130146	-0.0778525	-0.00583461	-0.0394101	-0.0168847	-0.0299571	-0.0639265	-0.0658885	-0.110658	-0.0319286	-0.0978231	-0.158327	-0.0343729	0.021848	-0.0785213	0.0276381	0.0266541	0.051025	-0.024384	-0.159161	-0.101818	-0.0803071	-0.120191	-0.0973522	-0.00733202	-0.0571767	-0.105812	-0.173413	-0.139282	-0.077298	-0.116795	-0.0738517	-0.150104
100307	-0.0746466	-0.00335156	-0.136914	-0.16041	-0.117718	-0.0331875	0.0657413	-0.0575456	0.00533867	-0.264096	-0.22142	-0.391106	-0.0891706	-0.102298	-0.185986	-0.188124	-0.213901	-0.104451	-0.0969937	-0.0162116	-0.0131386	-0.0049972	-0.0566921	-0.113282	-0.0826399	0.0421069	-0.165974	-0.0522985	-0.125051	-0.0662316	-0.0211331	-0.118849	0.0373779	-0.113711	-0.123461	-0.159452	-0.0487037	-0.136545	0.0343645	-0.0276694	-0.0645992	-0.053387	-0.0153141	-0.0225467	-0.2002	-0.296723	-0.102126	-0.06661	-0.0284643
100408	-0.0181973	-0.0618098	-0.0673962	-0.0884445	-0.0853695	-0.0435332	-0.0925185	0.133083	0.126005	-0.135209	-0.0414901	-0.106026	-0.0602482	-0.05232	-0.0197801	-0.0791396	-0.177129	-0.0133318	-0.00433024	-0.0152786	0.00840751	-0.0238163	-0.0308107	-0.12589	-0.130733	-0.0617126	-0.0408661	-0.134054	-0.107734	0.0864793	0.0598311	-0.123921	0.0946176	0.000486005	-0.101638	-0.0153825	-0.144568	-0.233992	0.0124306	-0.0230642	-0.014601	-0.0738772	-0.0527382	-0.213477	-0.175049	-0.187965	-0.134191	-0.0766498	-0.0957852
100610	0.0607858	-0.0218081	-0.364689	0.0759884	-0.0244352	-0.0623818	0.00393411	0.11688	0.175818	-0.26724	-0.140326	-0.0991937	0.0276723	-0.266305	-0.363931	-0.0268802	-0.136399	-0.151014	0.0115992	-0.0764042	-0.0517662	-0.0993192	0.031842	-0.0314688	-0.16442	-0.0775143	-0.170423	-0.0907024	-0.115303	-0.149934	-0.0527392	-0.327794	-0.00460745	-0.242314	-0.176248	-0.00240175	-0.00575233	-0.168994	0.0886282	-0.000131877	0.086739	-0.0295976	-0.0446516	-0.333269	-0.0773095	-0.341432	0.0540552	-0.0464019	-0.13813
101006	-0.261084	-0.128401	-0.303611	-0.264524	-0.152194	-0.165625	-0.146977	0.0153867	0.0984166	-0.185926	-0.0476514	-0.166732	-0.162054	-0.159833	-0.41019	-0.196497	-0.134539	-0.10539	-0.192061	-0.206963	-0.163207	-0.158895	-0.0147749	-0.0995535	-0.0520483	-0.0618407	-0.280922	-0.303248	-0.0705801	0.095892	-0.159399	-0.176253	0.0434249	0.107022	0.0123703	-0.221716	-0.239694	-0.398764	0.0850934	-0.0170408	-0.0144197	-0.162771	-0.0713569	-0.126709	-0.348208	-0.328592	-0.0645574	-0.118771	-0.370721
101107	-0.0459992	-0.0267438	-0.10081	-0.0409743	-0.0607941	-0.0343782	-0.0258361	-0.0614902	-0.0416104	-0.0508376	-0.0149239	-0.00263945	-0.0574424	-0.0300764	-0.0757573	-0.0426492	-0.0403478	0.0163374	-0.0399714	-0.0467186	-0.0112836	-0.0480578	-0.0187554	0.0242587	-0.0429652	0.00757109	-0.0507116	-0.0301493	-0.0138239	0.0290273	-0.0543999	-0.0543992	0.0121318	-0.0120198	-0.0154615	-0.0767344	-0.105357	-0.0749698	-0.046943	-0.0273784	-0.0352347	-0.0385053	-0.0115141	-0.0476519	-0.0790497	-0.047785	-0.0367239	-0.0133431	-0.0510201
101309	0.0302356	0.0273753	-0.0201858	0.0718853	0.00823354	-0.00509351	-0.0085063	0.0629442	0.0651648	-0.0241099	-0.0846328	-0.0146723	0.029077	-0.0493655	-0.0841446	-0.0571002	-0.0442071	-0.0233155	0.0389979	0.0103079	-0.00102742	-0.0347085	0.0602872	-0.0114483	-0.161933	-0.0214551	-0.0772622	-0.04262	-0.112902	0.0127338	-0.0393886	-0.0896622	-0.0242661	-0.0206761	-0.102323	0.0591675	-0.00142384	-0.0839919	0.0662933	0.0100159	0.0311097	0.00299257	-0.0669416	-0.115423	-0.124999	-0.0742857	-0.0698323	-0.130893	-0.113865
101915	0.0363329	-0.0953318	-0.0832843	-0.062769	-0.0583865	-0.0916053	-0.0718673	-0.0141085	-0.0302219	-0.121659	-0.0774235	-0.109922	-0.0737091	-0.0821585	0.0123351	-0.0484888	-0.0557869	-0.0906142	-0.0555508	-0.0413569	-0.0333711	0.0137028	-0.0899101	0.00711395	-0.0327207	-0.148252	-0.0870716	-0.090288	-0.0174295	-0.144257	-0.0617718	-0.0628648	-0.126722	-0.0585271	-0.128355	-0.0940939	-0.0677252	0.0374061	-0.0755817	0.0373622	-0.0729514	-0.0705982	0.052067	-0.000348877	-0.00702932	0.0415485	-0.0902803	-0.122106	-0.0558884
102008	-0.159039	0.100919	-0.0669395	-0.13324	-0.154456	-0.137865	-0.0704714	0.0686416	0.0494016	-0.0296453	-0.0377723	-0.0597072	-0.0799122	-0.159484	-0.145011	-0.0837097	-0.0552254	-0.00203134	-0.101002	-0.0710875	-0.118304	-0.0813417	-0.020185	0.00402481	0.0516868	0.00842223	-0.0438484	0.0396134	-0.133943	-0.0524217	-0.0868168	-0.101482	-0.0300153	-0.0936993	-0.0365517	0.0317625	0.0325314	-0.0101847	0.00476882	0.056275	0.0575642	-0.0433542	-0.00116285	-0.0118086	-0.0117694	-0.156947	-0.0712315	-0.0859641	-0.107616
102109	-0.127449	0.0061826	-0.0846102	-0.124333	-0.138292	-0.015573	-0.141072	0.218262	0.179235	-0.111801	-0.0615884	-0.24203	-0.17662	-0.170235	-0.304294	-0.171737	0.0161365	-0.120056	-0.123167	-0.0349095	-0.000628384	0.049743	-0.000752305	0.0495427	-0.0579425	-0.156368	-0.259527	-0.0653925	-0.119425	-0.107856	-0.166325	-0.146225	-0.0203354	-0.0354872	-0.0221244	0.0566836	-0.221957	-0.246121	0.0854758	0.0317496	0.112367	0.0475469	-0.0189443	-0.200348	-0.40344	-0.306719	-0.182255	-0.154399	-0.0768174
102311	-0.102412	0.00230693	-0.140566	-0.0757008	-0.0983876	-0.0539683	-0.0343096	0.0474789	0.0610706	0.00675818	-0.0475644	-0.00210956	-0.0994037	-0.0896515	-0.127263	-0.0870866	-0.0355686	-0.00233119	-0.0290709	-0.0361947	-0.036662	-0.0697404	0.0147383	-0.00562854	-0.146761	-0.00689127	-0.0568965	0.00815954	-0.0758103	-0.00124085	-0.0298806	-0.0465395	0.0229027	0.00395688	-0.0867661	-0.0566537	-0.0672783	-0.114483	-0.0496931	-0.0343314	-0.0165701	-0.049913	0.0270249	-0.124954	-0.139251	-0.122071	-0.0333738	-0.051041	-0.099082
102513	-0.238818	-0.0423122	-0.364898	-0.252549	-0.198821	-0.104757	-0.0141333	-0.0633606	-0.0210444	-0.235915	-0.101755	-0.131038	-0.12125	0.0349017	-0.257873	-0.145381	-0.176544	-0.174018	-0.153818	-0.0221199	-0.0522639	-0.087416	-0.107322	-0.0471692	-0.0903924	-0.015797	-0.110751	-0.227563	-0.0722771	0.00170942	-0.117649	-0.0383256	-0.0282762	0.0235494	-0.0492084	-0.00783229	-0.0291238	-0.103303	0.000107897	-0.0635112	-0.0872552	-0.137535	-0.080119	-0.156226	-0.156875	-0.207595	-0.17733	-0.173578	-0.173314
102614	-0.0579198	0.0296419	-0.256051	-0.143122	-0.188475	-0.131376	-0.068399	-0.0924606	-0.0836541	-0.481432	-0.146178	-0.473037	-0.0641266	-0.12765	-0.400022	-0.0986714	-0.163402	0.205695	-0.116987	-0.0903676	-0.104035	-0.00694635	-0.0188909	-0.0456078	-0.463512	-0.241197	-0.441463	-0.345771	-0.26353	-0.111859	-0.0817651	-0.438213	-0.0269128	-0.140069	-0.264096	-0.119348	-0.230203	-0.333694	-0.00567799	-0.198338	-0.0195053	-0.111098	0.0188433	-0.416599	-0.327449	-0.357366	-0.19703	-0.115734	-0.161145
102715	0.0656783	0.0518166	-0.0360584	0.0616647	0.0213192	-0.0828967	0.106503	0.00542212	0.0433588	-0.125054	-0.0976355	-0.0338678	0.00954559	-0.195635	-0.249644	-0.0491816	-0.0416359	-0.00504244	0.0228326	-0.0643581	-0.0703333	-0.05811	-0.00759576	-0.118604	-0.175238	-0.0506525	-0.302477	-0.151393	-0.133012	-0.197347	-0.0334422	-0.295649	-0.0943005	-0.188199	-0.21961	-0.216723	-0.13761	-0.157158	-0.00271289	-0.198531	0.00663301	0.0769459	-0.0710373	-0.0667212	-0.19745	-0.314893	-0.00982002	-0.0156199	-0.00995613
102816	-0.086076	-0.0906633	-0.192648	-0.0560453	-0.0502942	-0.0849013	-0.0431152	0.0181587	0.030736	-0.158442	-0.0367505	-0.0302756	-0.123173	-0.090431	-0.138478	-0.218896	-0.159	-0.100201	-0.112635	-0.0596269	-0.0158019	-0.0181894	-0.00724999	-0.0827157	-0.123557	0.0116991	-0.0636471	-0.0199107	-0.0578454	-0.01922	-0.0803187	-0.0993753	-0.0190139	-0.0262957	-0.0607222	-0.0717157	-0.0861637	-0.0950184	0.00824964	0.0707657	-0.00717926	-0.0713372	0.0618874	-0.0528535	-0.0864393	-0.186463	-0.158978	-0.10333	-0.195164
103010	-0.0660745	-0.0364521	0.026936	-0.0460025	0.00427242	-0.00495166	-0.0223403	-0.0177114	-0.0164164	-0.0994318	-0.0809851	-0.123832	-0.00628909	-0.0500889	-0.0506107	-0.0255422	0.00224268	-0.0736921	-0.012012	-0.0215628	-0.00231441	-0.05164	-0.000737549	-0.0809328	-0.0994318	-0.0461841	-0.0572274	-0.00826972	-0.033855	-0.0242611	0.0085771	0.00929808	0.00773681	-0.0209768	0.0103815	-0.0663329	-0.0974943	-0.0344111	-0.017227	-0.0252465	-0.0472438	0.00558148	-0.0232358	-0.069682	-0.0390989	0.0113907	-0.0231594	0.0211738	0.000195602
103111	-0.0491406	-0.0854872	-0.0904772	-0.0618643	-0.0887606	-0.0974251	-0.0608224	-0.276242	-0.222545	-0.275853	-0.205862	-0.244671	-0.0656212	-0.11051	-0.258475	-0.15921	-0.185024	-0.158932	-0.156619	-0.145443	-0.18306	-0.0831121	-0.0812286	-0.0738736	-0.213863	-0.231059	-0.173777	-0.162657	-0.0825642	-0.0113493	-0.0678922	-0.160532	0.0136659	-0.124062	-0.24952	-0.145914	-0.0938634	-0.170468	-0.0932923	-0.129431	-0.10325	-0.157963	-0.0834493	-0.219533	-0.212822	-0.191787	-0.265105	-0.198571	-0.0440259
103212	-0.0687795	-0.0038868	-0.105789	-0.137983	-0.125633	-0.0460576	-0.0395317	0.0047173	-0.0274017	-0.0266381	-0.0157651	0.000990396	-0.117094	-0.212452	-0.183606	-0.0736223	-0.0266778	0.00579522	-0.0342752	0.0205007	0.00660121	-0.0339973	0.00527282	-0.102074	-0.0661979	0.0179445	-0.183312	-0.0906515	-0.0851222	-0.105122	-0.148398	-0.112797	-0.0489221	-0.178677	-0.198115	-0.154478	-0.065183	-0.0469706	-0.000877987	-0.0398054	-0.00860466	-0.0486209	0.0201407	-0.0731783	-0.133792	-0.145445	-0.134341	-0.0605331	-0.175267
103414	-0.107597	0.0302453	-0.029251	-0.16581	-0.146885	-0.0881901	-0.12568	0.0326799	0.0596979	-0.0823294	-0.288104	-0.169461	-0.134512	-0.0664924	-0.120406	-0.14686	-0.184809	-0.146665	-0.0277272	-0.0655671	-0.0768559	-0.0819269	0.0389101	0.0183816	-0.0917836	-0.0993311	-0.171251	-0.130429	-0.0754279	0.0190623	0.0672363	-0.0707828	0.108393	-0.0460374	-0.0646994	-0.0831963	-0.0709517	-0.169411	-0.00612004	-0.0226091	0.0103311	-0.0809761	-0.0117717	-0.237082	-0.113854	-0.252487	-0.0371879	-0.077054	-0.110086
103515	-0.105762	-0.111284	-0.0915043	-0.165447	-0.133915	-0.103369	-0.142989	0.0115084	0.0151218	-0.226123	-0.113718	-0.224232	-0.150581	-0.047947	-0.0232104	-0.185397	-0.0971708	-0.155456	-0.116576	-0.119448	-0.0814367	-0.146203	-0.099245	-0.0351536	-0.142442	-0.0518734	-0.044563	-0.0592115	-0.0675036	-0.0147543	0.00838127	-0.111435	0.0888668	0.0510499	0.0466668	-0.113897	-0.134396	-0.143135	-0.0880503	-0.0695043	-0.0117649	-0.112801	-0.109287	-0.139672	-0.0648455	-0.127457	-0.132999	-0.140207	-0.113789
103818	-0.13977	-0.0582731	-0.254614	-0.161721	-0.171753	-0.0479065	-0.0766153	0.0929564	0.133243	-0.193683	-0.111725	-0.150803	-0.212156	-0.0950326	-0.212138	-0.130181	-0.101177	-0.0370312	-0.157196	-0.191006	-0.0712736	-0.0484461	-0.132978	0.056842	-0.270388	-0.000415165	-0.0727955	-0.0855507	-0.259215	0.0805323	-0.0334863	-0.102196	0.127035	0.0609267	0.0885284	-0.0331211	-0.142569	-0.246553	-0.111402	-0.0668656	0.0519773	-0.0791557	-0.145281	-0.30383	-0.246387	-0.286098	-0.081028	-0.110683	-0.10602
104012	-0.0195075	0.0369231	-0.12801	-0.0153266	-0.0887481	-0.0570564	0.00185915	0.0549271	0.104398	-0.542264	-0.168666	-0.182758	-0.0144843	-0.0491575	-0.202535	-0.134772	-0.104698	-0.121032	-0.0659875	0.0277309	0.0405513	-0.00354689	0.0866302	0.0688158	-0.0248621	0.0110585	-0.248756	0.0366735	-0.0984638	0.106152	0.0237619	-0.151217	0.0948574	-0.0380582	-0.172376	-0.0806932	-0.0420258	-0.215421	0.118405	-0.0412554	0.0605251	0.0859339	-0.0392237	-0.322873	-0.0977173	-0.0792869	-0.194028	-0.304396	-0.00132977
104416	-0.226348	-0.187222	-0.235438	-0.318919	-0.326056	-0.226983	-0.0368268	0.112394	0.0815095	-0.118622	-0.165806	-0.112994	-0.285836	-0.175689	-0.169362	-0.21098	-0.0738382	-0.097405	-0.0671963	-0.187865	-0.166187	-0.217652	-0.111022	-0.0261675	-0.146185	-0.164768	-0.294804	-0.177461	-0.122575	0.0875492	0.0514099	-0.0864621	0.125465	-4.32358e-05	-0.0239035	-0.0594863	-0.199356	-0.25863	-0.0321038	-0.0554104	0.0108124	-0.0859678	-0.0479579	-0.0663287	-0.089102	-0.0870084	-0.0212081	-0.212696	-0.0384833
104820	-0.0622326	-0.0671608	-0.127542	-0.0546218	-0.0538505	-0.0583346	-0.0714816	-0.0173818	-0.00408241	-0.0932703	-0.101403	-0.0999521	-0.0482589	-0.0369155	-0.138463	-0.0623328	-0.153809	-0.125656	-0.0638876	-0.0517449	-0.0611638	-0.0681284	-0.0716313	-0.0153318	-0.120359	-0.0386541	-0.146189	-0.177685	-0.0127006	0.0123811	-0.0104408	-0.0363991	0.0464707	0.000249453	0.000314279	-0.0328135	-0.0535952	-0.121594	0.00411281	-0.0872928	-0.022376	-0.0774253	-0.0357728	-0.132445	-0.0788956	-0.18334	-0.107576	-0.0852517	-0.141582
105014	-0.137041	-0.0309085	-0.156687	-0.140615	-0.0962239	-0.13246	0.0130117	0.08045	0.0548018	-0.0751611	-0.0712013	-0.0711664	-0.1263	-0.0873792	-0.0930653	-0.142264	0.0187729	-0.0314119	-0.0339256	-0.0603332	-0.0909917	0.000707028	0.0575722	-0.118414	-0.135737	-0.0967535	-0.160577	0.00701224	-0.00268242	-0.0371165	-0.0507338	-0.150566	-0.0131883	-0.108194	-0.161395	-0.105901	-0.154853	-0.232349	0.0233068	0.00458218	0.0454085	0.0547585	-0.0373854	-0.0508233	-0.108491	-0.0537912	-0.0992929	0.0589777	0.0203159
105115	0.0544939	-0.161787	-0.261802	0.035743	0.0403164	-0.0216359	-0.00953308	0.00821375	-0.0329203	-0.277812	-0.438595	-0.661891	-0.0583018	-0.187004	-0.282532	-0.132464	-0.143732	-0.144567	-0.101875	-0.130922	-0.0592871	-0.0939224	-0.0590961	-0.0340734	-0.227313	-0.402642	-0.329027	-0.304619	-0.422418	-0.171076	-0.12042	-0.514867	-0.131506	-0.00728942	-0.236602	-0.295268	-0.271125	-0.31986	-0.190234	-0.39723	-0.0225862	-0.35552	-0.00264614	-0.330899	-0.445878	-0.123304	-0.39331	-0.356627	-0.56916
105216	-0.296568	-0.182876	-0.239943	-0.234217	-0.302299	-0.29521	-0.332433	0.0797611	0.041705	-0.560368	-0.383719	-0.359253	-0.216783	-0.0135492	-0.308488	-0.278932	-0.354004	-0.302346	-0.23982	-0.305821	-0.228998	-0.262159	-0.249956	-0.134135	-0.377053	-0.0225701	-0.359603	0.0699769	-0.00756363	0.232176	-0.0656182	-0.300878	0.251252	0.0837016	-0.081241	-0.250917	-0.353056	-0.332077	-0.0914052	-0.213583	0.0654674	-0.198525	-0.403596	-0.407915	-0.398333	-0.475529	-0.219043	-0.318772	-0.335227
105620	-0.191425	0.0133064	-0.239587	-0.235738	-0.251647	-0.171023	0.0340845	-0.0383421	-0.0132425	-0.41999	-0.243254	-0.47487	-0.217023	0.0117778	-0.175753	-0.165233	-0.109107	-0.0294241	-0.177346	-0.173862	-0.147051	-0.103457	-0.0261946	-0.0577615	-0.36661	-0.413806	-0.207929	-0.428192	-0.213502	0.152009	-0.0859064	0.103975	0.113463	0.191262	-0.00045165	0.0656597	-0.00237635	-0.250182	0.0957963	-0.164231	-0.0852081	-0.22242	-0.237503	-0.49168	-0.193038	-0.328711	-0.17355	-0.281121	-0.160198
105923	-0.119594	-0.047318	-0.0588377	-0.157031	-0.185049	-0.109626	-0.0610214	0.0720987	0.0804725	-0.106195	-0.074156	-0.0894966	-0.13785	-0.00752026	-0.0988265	-0.116858	-0.151228	-0.141739	-0.0547795	-0.123072	-0.0886436	-0.145331	0.00816135	0.108041	-0.0818398	-0.076795	-0.118639	-0.0687083	-0.0495398	-0.00991085	0.0273909	-0.068445	0.0270275	-0.0692666	-0.0260105	0.0349658	-0.114665	-0.100819	-0.00223489	0.0544372	0.061952	0.0072607	0.0535629	-0.0378336	-0.190392	-0.11812	-0.0856458	-0.0366856	-0.0599418
106016	-0.103701	-0.0811543	-0.101471	-0.152962	-0.106808	-0.0907282	0.0370448	-0.00233449	-0.000948101	-0.167388	0.126137	-0.136011	-0.117688	0.0247865	-0.0523927	-0.105157	-0.15847	-0.0738051	-0.0822728	-0.0368431	-0.0565695	0.0170229	-0.0315066	-0.105963	-0.167452	0.0961922	-0.196778	-0.197884	-0.0685078	0.00763391	-0.0350528	0.0278332	0.0677948	-0.00740159	-0.0553906	-0.0778477	-0.187389	-0.146928	-0.0743842	-0.00721043	-0.037137	-0.145603	0.0123907	-0.0822406	-0.268949	-0.118936	-0.101513	-0.128844	-0.0960147
106319	-0.0912476	-0.00453062	-0.0980207	-0.0827238	-0.0696275	-0.0292492	-0.0353866	-0.0312703	-0.039963	-0.0460067	-0.100052	-0.0747623	-0.0231734	-0.10517	-0.0872137	0.00701163	0.0238131	-0.0314361	0.0109679	0.00239862	-0.0244054	-0.0404315	-0.0239253	0.0124153	-0.095034	-0.0667354	-0.102564	-0.0448675	-0.0132975	-0.00382042	-0.0949844	-0.00787071	0.010947	0.0281731	-0.0242146	-0.0448643	0.0145097	-0.0268961	0.0136934	-0.0463456	-0.0066386	0.0310766	-0.0368183	-0.00612991	-0.0115309	-0.0321749	-0.0319071	-0.026596	0.0201232
106521	-0.0168217	-0.0277284	-0.0756099	-0.0661537	0.000918916	-0.00798461	-0.0903555	0.0709057	0.073704	-0.113296	-0.108956	-0.113064	-0.0212811	-0.282251	-0.24336	-0.0913344	-0.0783745	-0.17329	0.00818554	-0.0593038	0.010215	0.0454673	-0.087868	-0.063634	-0.175336	-0.0368335	-0.222561	-0.0720947	-0.257196	-0.204313	-0.192955	-0.254617	-0.258571	-0.196857	-0.245841	-0.146798	-0.100739	-0.129426	-0.047784	0.00600252	0.10015	-0.153505	-0.0888077	-0.0891821	-0.275588	-0.254984	-0.2868	-0.0956101	-0.186943
106824	-0.134709	-0.0486857	-0.135239	-0.103674	-0.160991	-0.130801	-0.0530575	-0.0343651	0.00484691	-0.236808	-0.174184	-0.421987	-0.1331	0.0775637	-0.196035	-0.0971282	-0.260805	-0.0816367	-0.0683783	-0.113967	-0.103386	-0.19812	-0.0455307	-0.0177247	-0.104524	-0.337226	-0.151413	-0.141154	-0.175017	0.106987	0.0622579	-0.244989	0.0893102	0.0807376	-0.0282808	-0.0191801	-0.035937	-0.179093	0.0161602	-0.0140807	-0.0327478	-0.219542	-0.206235	-0.190852	-0.301432	-0.348794	-0.253755	-0.0126411	-0.273874
107018	-0.0843505	-0.00231941	-0.165843	-0.0867632	-0.116871	-0.104613	-0.0150179	0.0490851	0.116818	-0.161005	-0.260723	-0.277287	-0.0679025	-0.076502	-0.181797	-0.0486904	-0.0342361	-0.0336515	-0.055818	-0.0489097	-0.0863901	-0.132429	-0.064987	0.00909023	-0.180752	-0.330767	-0.24006	-0.125451	-0.0789843	-0.0544762	0.0888836	-0.198701	0.0356596	-0.0525806	-0.179982	-0.00679787	-0.117191	-0.291097	0.0251731	0.0186465	0.00219545	-0.0607286	-0.144094	-0.1889	-0.236849	-0.093539	-0.0525705	0.00293105	-0.116808
107321	-0.0438959	-0.0746182	-0.00580649	-0.0164338	-0.111537	-0.143645	-0.0527471	0.0647709	0.0694157	-0.217814	-0.173327	-0.29007	-0.077522	-0.101516	-0.178048	-0.10226	-0.0422984	-0.166507	-0.0457146	-0.130469	-0.127212	-0.1471	-0.0192566	0.0684256	-0.125914	-0.138291	-0.182614	-0.0248831	-0.172794	-0.0746712	0.00681713	-0.172582	0.0173708	-0.0158863	-0.0549694	-0.0860205	-0.181782	-0.214749	-0.0136697	-0.0622807	-0.086801	-0.107516	-0.18026	-0.263765	-0.2074	-0.195	-0.0870935	-0.153374	-0.137057
107422	-0.0417033	-0.0500679	-0.0521052	-0.086015	-0.0820906	-0.0788436	-0.0656198	-0.00357365	-0.0192407	-0.0463506	-0.0790958	-0.104337	-0.0627093	-0.0968348	-0.125293	-0.0983862	-0.130539	-0.038307	-0.115835	-0.10592	-0.0660108	-0.0688292	-0.022707	0.0378048	-0.0508048	-0.00360545	-0.112467	-0.0324585	-0.0739084	-0.0138246	-0.0645988	-0.0311001	0.0140798	-0.0363049	-0.0585787	-0.0472817	-0.0213467	-0.0414357	-0.0335687	-0.026102	0.0106486	-0.0703121	0.0256543	-0.079848	-0.053848	-0.100334	-0.0977976	-0.04379	-0.045724
107725	-0.0867416	-0.110905	0.00911146	-0.197378	-0.195541	-0.121364	-0.0457709	-0.0746435	-0.101282	-0.142026	-0.237462	-0.405135	-0.144139	-0.114553	-0.0442585	-0.105838	-0.0952391	-0.20763	-0.0779354	-0.0247393	-0.176377	-0.149239	-0.103477	-0.0387253	-0.270489	-0.367716	-0.256048	-0.361287	-0.14062	-0.240835	-0.204637	0.0649427	-0.220131	-0.140334	-0.199272	0.0798362	0.0711855	0.0719625	-0.0449373	-0.0578156	0.0725016	-0.0746977	-0.102807	-0.154824	-0.144104	0.0734455	-0.122831	-0.120351	-0.0862213
108020	-0.141621	-0.0224473	-0.11783	-0.137186	-0.154391	-0.0786746	-0.122411	0.0607519	0.0452441	-0.176195	-0.232186	-0.117613	-0.109585	-0.0439376	-0.185174	-0.131096	-0.0715245	-0.0525765	-0.0669629	-0.11954	-0.0888429	-0.0879035	-0.045768	-0.102001	-0.174295	-0.0373469	-0.0669255	-0.0695176	-0.105781	0.0452159	0.0621094	-0.0471009	0.0979853	0.0424185	-0.0186653	-0.0457053	-0.200404	-0.18672	0.0393222	-0.0838022	0.0167819	-0.0595161	-0.280787	-0.1605	-0.117099	-0.179251	-0.00405814	-0.0796442	-0.0607563
108121	-0.12408	-0.103968	-0.223017	-0.110655	-0.0892331	-0.00902519	-0.0979788	0.014605	0.0364459	-0.299422	-0.0764553	-0.275268	-0.0573834	-0.119823	-0.208629	-0.0702319	-0.13144	-0.110847	0.00235163	-0.0190023	-0.0261311	-0.0223608	-0.0101283	-0.0311014	-0.150639	0.118076	-0.215306	-0.121006	-0.0913596	-0.0334785	-0.100428	-0.191959	-0.00846957	0.0231445	-0.127703	-0.145039	-0.148205	-0.186272	-0.0110406	-0.1314	0.00193785	-0.077806	-0.0799907	-0.296101	-0.250036	-0.291694	-0.146979	-0.0821827	-0.10326
108222	-0.0131643	-0.00935489	-0.0812312	-0.068588	-0.0782987	-0.0789668	-0.0726283	-0.0570193	-0.0717876	-0.124096	0.0210573	-0.0733942	-0.0687767	-0.0558848	-0.0976161	-0.0625845	-0.0349445	-0.0872538	-0.0265761	-0.073483	-0.0844049	-0.0788815	-0.0286292	-0.0991098	-0.119199	0.00124457	-0.00906916	-0.0934095	0.0120659	0.0164874	0.015868	-0.0611154	0.0358648	-0.0378898	0.0117983	-0.081438	-0.118834	-0.145245	-0.0218467	-0.11186	-0.0659983	-0.0354322	-0.0762332	-0.0859816	-0.0789234	-0.0219976	-0.0366516	-0.0248065	-0.0339044
108323	-0.0940671	-0.0111485	-0.228355	-0.166103	-0.216339	-0.154497	-0.0968531	0.026074	-0.00843871	-0.271253	-0.107524	-0.156539	-0.188612	0.113472	0.00728087	-0.210927	-0.123741	-0.172283	-0.165638	-0.130789	-0.110579	-0.122816	-0.0912035	-0.0345323	-0.203552	-0.200573	-0.0394303	-0.0465924	0.0792398	0.0343667	0.0757967	-0.124352	0.032283	0.051346	-0.015308	-0.0402234	-0.0233401	-0.158018	0.0430173	-0.0106605	0.00491059	-0.151181	-0.128274	-0.117836	-0.134665	-0.205557	-0.0791315	-0.24111	-0.159604
108525	-0.0398498	-0.0332364	-0.077738	-0.0587982	-0.0627598	-0.0100338	-0.0428094	-0.00941881	-0.0454548	-0.0917048	-0.0693261	-0.0376041	-0.0653104	-0.0741484	-0.106197	-0.0869068	-0.0368203	-0.0635664	-0.0386466	-0.0182466	-0.0813382	-0.033625	-0.0392989	-0.0438263	-0.0708045	-0.0250469	-0.0959477	-0.0373876	-0.116638	-0.032434	-0.0644375	-0.0469317	0.000751516	-0.00323873	-0.0230035	-0.01932	-0.0487042	-0.0698568	0.034464	-0.0514498	-0.0212351	-0.0697177	-0.0321999	-0.0841818	-0.0514306	-0.0509988	-0.061132	-0.0268703	-0.0144992
108828	-0.144056	-0.0506803	-0.0899889	-0.206286	-0.208655	-0.158998	-0.030472	-0.0431133	-0.0423468	-0.139474	-0.0235156	0.00419841	-0.119962	-0.00521116	-0.0567729	-0.152315	-0.070305	-0.0938266	-0.110533	-0.112289	-0.100239	-0.109196	-0.0760407	-0.0810243	-0.0691787	0.0360665	-0.00473791	-0.0247223	-0.0256182	0.0280238	-0.0644446	0.0192144	0.0304625	0.02142	0.0344193	-0.0777873	-0.144723	-0.101814	-0.115629	-0.0994901	-0.0322529	-0.111273	-0.0968315	-0.066418	-0.067845	-0.146935	-0.164023	-0.122917	-0.143544
109123	-0.0482506	-0.0380987	-0.00162616	-0.0677168	-0.0515441	-0.0621412	-0.0718987	0.0638268	0.0800236	-0.105043	-0.0834793	-0.0624131	-0.00137796	-0.00121761	-0.0858112	-0.0714104	-0.0116091	-0.0302064	-0.071532	-0.053	-0.04452	-0.0360887	-0.0544697	-0.0237238	-0.109992	-0.098005	-0.193705	-0.0795147	-0.12903	-0.00909717	0.0152069	-0.12629	0.0654209	0.0328116	-0.00726623	-0.0143799	-0.116376	-0.136262	-0.00708639	-0.00673254	-0.0184193	-0.0499955	-0.0152597	-0.138208	-0.155977	-0.0570355	0.00653695	-0.0804378	-0.0219636
109325	-0.208374	-0.120148	-0.288961	-0.205376	-0.163431	-0.124349	-0.159884	-0.0335373	-0.0120383	-0.0922601	-0.23997	-0.0290037	-0.0965024	0.033497	-0.0958141	-0.114362	-0.178688	-0.207634	-0.0438166	-0.107078	-0.0651081	-0.0586591	-0.133594	-0.052501	-0.148179	-0.458433	0.0260574	-0.227938	0.104871	0.25812	0.0348097	-0.143675	0.163467	0.166382	0.121007	-0.121158	-0.102448	-0.180788	-0.055141	-0.0793025	-0.0907061	-0.0932876	-0.216054	-0.240209	-0.302125	-0.187934	-0.193436	-0.253101	-0.1113
109830	0.0363712	-0.00764997	-0.0271499	0.0586464	0.0567222	0.0895511	-0.0269986	-0.0367886	-0.0324142	-0.0753135	-0.0673904	-0.10469	0.0128721	-0.0465527	-0.0703112	-0.0724776	-0.0437285	-0.00187391	0.0066997	0.0306997	-0.0123916	0.00752724	-0.0148626	-0.0573888	-0.0509146	-0.0470116	-0.0635461	-0.0658063	-0.0387011	-0.00959131	-0.0597453	-0.00777998	-0.0209136	-0.0182154	0.00116014	-0.00231939	-0.0349358	-0.0488031	-0.0309732	-0.0511142	-0.0198327	-0.0291989	-0.0361606	-0.0773556	-0.0502991	-0.0811003	-0.0572795	-0.0901907	-0.0476085
110007	-0.13418	-0.0387643	-0.0617769	-0.169557	-0.137343	-0.101273	0.0365458	0.0062081	-0.0133551	-0.111781	-0.000622554	-0.0474032	-0.10253	-0.0657045	-0.12453	-0.115878	-0.0540519	-0.0718998	-0.0410631	-0.12641	-0.0595827	-0.0914539	-0.0725451	-0.0945408	-0.168402	-0.0956794	-0.0758424	-0.107126	0.00671395	0.00750156	0.0456054	-0.077131	0.0795126	0.0189746	-0.0309728	-0.0876545	-0.123857	-0.0999295	-0.00979703	-0.0826285	0.00778995	-0.0341434	-0.0561177	-0.0445567	-0.0607683	-0.054467	-0.0486392	-0.000432764	-0.0477023
110411	-0.0656094	-0.0267358	-0.144631	-0.0152043	-0.0333986	-0.0257117	-0.0593485	0.0416106	0.0558351	-0.127477	-0.106653	-0.163347	-0.0253147	-0.0142553	-0.147627	-0.0305059	-0.0484678	-0.0259853	-0.041451	-0.0400986	-0.0358373	-0.080614	0.0139694	-0.0463711	-0.131175	0.0244183	-0.13061	-0.143606	-0.177811	-0.00845743	0.0540796	-0.115813	0.104993	0.0264273	-0.0229767	0.0197381	-0.124812	-0.173848	0.0347191	0.0259882	-0.00203135	0.0444854	-0.0449521	-0.13128	-0.111921	0.00711919	-0.031044	-0.0212968	0.00780331
110613	-0.0346218	0.00691299	-0.0409835	-0.0539646	-0.0429079	0.00161654	-0.0249358	0.0425049	0.0217551	0.0431793	0.0168837	-0.00739034	-0.029741	-0.104079	-0.185793	-0.0621132	-0.0930273	-0.00652659	-0.000651722	0.0230493	-0.00872292	-0.0395185	-0.0146581	0.0182921	0.0562437	-0.0156459	-0.204012	-0.133726	-0.146145	-0.157209	-0.063369	-0.134904	-0.095782	-0.0942522	-0.119525	-0.0245307	-0.00510028	-0.0817403	0.0108493	-0.00706876	-0.0137001	-0.0208737	0.0160368	0.0330554	-0.0903685	-0.00354373	-0.0551604	-0.0445874	-0.0299392
111009	0.00810242	0.210478	-0.0996555	0.225585	0.290236	0.063894	0.0620826	0.153294	0.170243	-0.092316	-0.408795	-0.513024	0.182236	-0.313012	-0.250992	0.0717881	-0.13158	-0.195768	-0.0220521	-0.0477587	-0.00706187	-0.106313	0.0526048	-0.0481093	-0.581099	-0.133802	-0.414157	-0.406245	-0.0322177	-0.0316711	-0.102445	-0.395082	-0.110849	-0.139607	-0.183836	-0.131993	-0.382215	-0.491095	-0.173646	-0.176448	0.0694804	-0.154656	-0.0941682	-0.615779	-0.416203	-0.489091	-0.268592	-0.117301	-0.247108
111211	-0.0602187	0.02643	-0.0571545	-0.0595524	-0.0838625	-0.0896291	-0.0374469	-0.0110992	-0.00806183	-0.250648	-0.0895541	-0.212352	-0.0938054	0.0647283	-0.0402653	-0.0855389	-0.0653862	-0.0577689	-0.0573668	-0.00498848	-0.0234616	-0.136338	0.0366144	-0.0145201	-0.192265	0.051366	-0.027326	-0.143306	-0.097489	0.0781286	0.102765	-0.00905397	0.10194	0.0572329	0.0698343	-0.0950409	-0.0754002	-0.185342	0.00395282	0.0145433	-0.0157027	-0.0389097	-0.0626655	-0.188017	-0.0268106	-0.0925928	-0.0374867	-0.0682172	-0.0519462
111312	-0.142083	-0.0919709	-0.156166	-0.167595	-0.215175	-0.142893	-0.145326	0.000919234	0.024961	-0.205907	-0.193226	-0.287046	-0.134451	-0.00194743	-0.162926	-0.200777	-0.141711	-0.211336	-0.0823964	-0.122787	-0.106744	-0.124847	-0.0943383	-0.0654432	-0.205316	-0.142743	-0.00390432	-0.26296	-0.134921	0.0722288	0.0162798	-0.00568127	0.0950167	0.078565	0.115998	-0.0845338	-0.120892	-0.0240619	-0.00685514	-0.0905858	-0.0207538	-0.0904521	-0.174371	-0.25523	-0.111583	-0.169759	-0.20048	-0.126706	-0.135287
111413	0.0341115	-0.0618594	-0.273395	0.0444455	0.0214692	0.0297008	-0.0578405	0.12452	0.186884	0.00998409	-0.0163863	-0.0188313	-0.0954297	-0.201168	-0.337667	-0.0198228	-0.177066	-0.0322397	0.0133003	0.0755871	-0.0301769	-0.169473	-0.0884276	0.039336	0.0182989	-0.326081	-0.435251	-0.234547	-0.251509	-0.18632	-0.0173995	-0.189646	-0.144679	-0.198759	-0.371406	-0.00703596	0.0148699	-0.177442	0.119647	-0.000861153	0.116905	-0.0510802	0.0066833	-0.245199	-0.356591	-0.434904	-0.148528	0.0444888	-0.0720204
111514	-0.364726	-0.116698	-0.37663	-0.355248	-0.37205	-0.295356	-0.296084	-0.0850279	0.00106786	-0.266879	-0.22261	-0.306623	-0.314961	0.0448283	-0.121883	-0.244308	-0.0466594	-0.151618	-0.257713	-0.234137	-0.258163	-0.209556	-0.343913	-0.0774577	-0.336755	-0.185496	-0.103489	-0.43018	0.118671	0.163054	0.0143034	0.0477065	0.178225	0.177757	0.152706	-0.113236	-0.262232	-0.235694	-0.120347	-0.187875	-0.167602	-0.29798	-0.255219	-0.130833	-0.241621	-0.0762439	-0.165003	-0.216214	-0.168844
111716	-0.0413243	-0.0503101	-0.0336997	-0.0359419	-0.0619649	-0.0607922	-0.0492478	-0.0423449	0.0235772	-0.00719083	-0.112653	-0.128949	-0.00319605	-0.144431	-0.262791	-0.0710722	-0.0355838	-0.149904	-0.0790978	-0.124256	-0.104651	-0.0811263	-0.0350467	-0.0620592	-0.173264	0.0263499	-0.168263	-0.0625413	-0.212862	-0.151969	-0.12454	-0.313765	-0.101389	-0.106522	-0.222799	-0.0709376	-0.00969582	-0.133052	-0.0410922	-0.133332	0.0201314	0.0245843	0.10518	0.014852	-0.0150999	0.0137747	0.00911275	0.00666256	0.0397913
112112	-0.0323406	-0.0353408	0.0019067	-0.0408215	-0.0110517	-0.0315638	-0.0150356	0.0203805	0.0201336	-0.0207926	-0.0643527	-0.0696495	0.0042006	-0.0850081	-0.133803	-0.0106007	-0.0222721	-0.0501966	-0.0115787	-0.0207414	-0.0208842	-0.0220108	-0.0506198	-0.00387437	-0.015757	0.0058408	-0.143261	0.00624815	-0.100832	-0.0299577	-0.00314347	-0.117464	0.0130767	-0.0483792	-0.0687862	-0.0355624	-0.0806808	-0.118701	-0.0100853	-0.00955808	-0.00922014	-0.0731434	0.00298941	0.000132603	-0.0754864	-0.112236	-0.0512948	-0.111565	-0.0915536
112314	-0.132438	0.0402307	-0.213656	-0.0867072	-0.0891577	-0.0147259	0.00593392	0.0845347	0.0662265	-0.0932452	-0.20071	-0.163162	-0.0780617	-0.221617	-0.214689	-0.0905722	-0.0689687	0.0248367	0.0575379	0.0721608	0.05921	-0.0117967	-0.0126828	-0.0134582	-0.221397	0.0400378	-0.318951	-0.160373	-0.107828	-0.0201059	-0.162128	-0.109109	-0.0125058	-0.118459	-0.221112	-0.071436	-0.119577	-0.263271	0.0682908	0.0311792	0.0840792	0.019307	0.0389761	-0.272042	-0.228273	-0.264858	-0.0761702	-0.0184215	-0.011484
112516	-0.034175	0.0400599	0.00920243	0.045696	0.00156126	-0.00195995	-0.00206923	0.0852859	0.10454	-0.303324	-0.0681854	-0.221021	-0.029899	-0.157784	-0.176669	0.0355624	-0.0726578	-0.050462	-0.0187957	0.00302011	0.0637886	0.0183557	0.0893482	-0.037609	-0.35305	-0.172584	-0.170302	-0.290036	-0.124952	-0.0491917	0.0458371	-0.249432	0.0334948	-0.165638	-0.150593	-0.0779366	-0.0681191	-0.211158	-0.0653718	-0.0168872	-0.00951585	-0.0076393	-0.136436	-0.327756	-0.101964	-0.190372	-0.0738746	0.0189902	-0.0515274
112920	-0.0730428	0.001008	0.103923	-0.0497712	0.00813526	-0.0293196	0.0192652	0.190292	0.195071	-0.177852	-0.157231	-0.200693	0.0105334	-0.120951	-0.249125	-0.0435931	-0.195414	-0.0679331	-0.00413735	0.032832	0.021921	0.00207754	0.0215548	-0.0190394	-0.0463553	-0.0739056	-0.130459	0.00579786	-0.210875	-0.0178628	-0.0362742	-0.251294	0.0464867	-0.0651605	-0.0763945	0.0735304	-0.0324388	-0.222216	0.0128725	0.0852947	0.0611025	-0.0250821	-0.0905436	-0.258833	-0.181755	-0.196117	-0.165184	-0.164942	-0.0283743
113215	-0.0926121	-0.0618229	-0.0814987	-0.133972	-0.111888	-0.10326	-0.0765656	0.00510526	0.00345602	-0.0669004	-0.00608857	-0.0597815	-0.122427	-0.0944875	-0.129326	-0.130334	-0.0445444	-0.00189602	-0.1157	-0.0663728	-0.0614185	-0.145362	-0.0246866	-0.0115668	0.00385495	-0.0586571	-0.120363	-0.0134256	-0.0966213	-0.0421577	-0.0757344	-0.0323884	-0.00589564	0.0350185	-0.014322	-0.0182461	-0.130631	-0.138736	0.0301814	-0.00712774	-0.00769564	-0.0405723	-0.00598816	-0.125631	-0.147506	-0.0930678	-0.0600192	-0.0186541	-0.00880451
113316	-0.147556	-0.130079	-0.189155	-0.150834	-0.154402	-0.0883055	-0.125442	-0.100882	-0.066746	-0.170419	-0.120861	-0.133547	-0.144308	0.00835239	-0.0464971	-0.152122	-0.052632	-0.101294	-0.132603	-0.0954514	-0.122028	-0.126027	-0.0952641	-0.0783538	-0.160034	0.0102185	-0.0902693	-0.0802223	-0.0338564	0.0419295	-0.0504635	0.0410744	0.0267808	0.0501847	0.0121243	-0.0956179	-0.08737	-0.129086	-0.0478674	-0.0663271	-0.0167892	-0.0674014	-0.0543185	-0.11248	-0.135333	-0.125703	-0.0433368	-0.0599819	-0.0996521
113619	-0.0123774	-0.0255011	-0.162136	-0.0902844	-0.0804118	-0.0553411	0.010232	0.0543106	0.0489925	-0.177422	-0.143108	-0.0798461	-0.0490561	-0.0755315	-0.198879	-0.0795128	-0.164467	-0.0325851	-0.0252021	-0.120011	-0.052122	-0.0601992	0.0263756	-0.0915512	-0.251753	-0.0589529	-0.261911	-0.195208	-0.0837854	-0.0199866	-0.0700015	-0.0679106	0.0502187	0.0393329	-0.0818808	-0.0606021	-0.168619	-0.175211	-0.0657264	-0.037191	-0.133123	-0.133109	-0.237049	-0.209516	-0.279964	-0.21798	-0.200817	-0.0547422	-0.181753
113922	-0.0507523	-0.0620169	-0.114325	-0.136312	-0.0810675	-0.0320584	-0.0160279	-0.0314644	-0.0398986	-0.0870456	-0.0968851	-0.0615436	-0.0701987	-0.0260263	-0.0750691	-0.0432759	-0.0161467	-0.0151223	-0.0347009	-0.0506083	-0.0297907	-0.00121022	-0.0630098	-0.0875841	-0.142576	-0.00951646	-0.181978	-0.121771	-0.0606845	0.0362792	-0.0742486	-0.0801555	0.0369658	0.0493466	0.0351463	-0.104116	-0.135434	-0.120622	-0.0850547	-0.0524539	-0.0181477	-0.100582	-0.100647	-0.0977443	-0.213714	-0.0790796	-0.0574701	-0.0388721	-0.0707459
114217	-0.204434	0.0306031	-0.246965	-0.19255	-0.218464	-0.0740019	-0.109774	-0.0502771	-0.0194853	-0.181241	-0.22978	-0.240377	-0.155707	-0.000655708	-0.175773	-0.0771425	-0.0888124	-0.0907104	-0.0259354	-0.0523798	-0.0549529	-0.0758011	0.034641	0.0162615	-0.157956	-0.0591677	-0.151032	-0.23018	-0.166656	0.0145007	-0.0338302	-0.093269	0.147455	0.0634757	-0.0199697	-0.145013	-0.0891745	-0.174932	-0.0737737	-0.129408	-0.0388098	-0.0689959	-0.136936	-0.228404	-0.177035	-0.230072	-0.136196	-0.124737	-0.133003
114318	0.00473535	-0.0391186	-0.0800638	-0.0518405	-0.0695475	-0.0862245	-0.00350456	0.024503	0.0482207	-0.122813	-0.0374813	-0.0349897	-0.0732302	-0.127015	-0.198041	-0.112343	-0.148988	-0.227291	-0.109313	-0.0997153	-0.111389	-0.117908	-0.019653	0.0558325	-0.139887	-0.23415	-0.340273	-0.169035	-0.246456	-0.11517	-0.0761412	-0.125502	-0.0407108	-0.153454	-0.227354	-0.122397	-0.0446458	-0.0590245	-0.100545	0.0390808	0.04488	0.0270275	-0.0582822	-0.142691	-0.0896448	-0.130588	-0.236079	-0.111604	-0.137813
114419	-0.0935076	-0.0197691	-0.0758746	-0.0465288	-0.04657	-0.0238675	-0.0244657	-0.0434881	-0.0437069	-0.0944342	-0.0842698	-0.148594	-0.0565912	-0.0732917	-0.126646	-0.0326073	-0.00607938	-0.0839383	-0.0679297	-0.0326815	-0.076225	-0.0741671	-0.0416335	-0.0870665	-0.100251	-0.0932166	-0.0579749	-0.0975797	-0.0902024	-0.0298357	-0.00375572	-0.0618647	0.0232014	-0.00968502	-0.0183175	-0.10686	-0.16097	-0.142587	-0.0562891	-0.0420896	-0.0233654	-0.0374912	-0.0346135	-0.128346	-0.0860816	-0.120447	-0.0817802	-0.0560518	-0.029838
114621	-0.09159	-0.11547	-0.0953561	-0.167176	-0.160507	-0.155408	-0.157076	0.0352086	0.00358667	-0.10023	-0.164592	-0.130293	-0.0943631	-0.0686533	-0.187962	-0.110673	-0.172359	-0.17372	-0.117714	-0.133217	-0.135231	-0.156132	-0.0922132	-0.0258805	-0.176064	0.0431419	-0.14892	-0.161952	-0.116087	0.0481766	-0.0287685	-0.144507	0.0437358	-0.11347	-0.000691187	-0.11106	-0.0960207	-0.221148	0.0419638	-0.0356807	0.0808815	-0.180697	-0.0110987	-0.157033	-0.295325	-0.18957	-0.142028	-0.201931	-0.187895
114823	-0.157316	-0.0520388	-0.135811	-0.130729	-0.161196	-0.0856937	-0.115206	0.0561353	0.0474256	-0.141693	-0.121208	-0.223163	-0.067162	-0.143307	-0.239746	-0.126763	-0.0913468	-0.174434	-0.106831	-0.125368	-0.0701101	-0.105411	-0.0678847	-0.00209396	-0.126324	-0.141791	-0.0889996	-0.119468	-0.144704	-0.0178071	-0.0841693	-0.0650867	0.0286837	-0.0487287	-0.0104147	-0.129163	-0.142666	-0.124549	0.0536632	-0.0572645	0.0416085	-0.0520724	0.015783	-0.141569	-0.154807	-0.223788	-0.102679	-0.0666488	-0.0952935
114924	-0.0476141	-0.0100568	-0.0499688	-0.055534	-0.0661329	-0.0634072	-0.0252689	-0.0462779	-0.0571135	-0.158885	-0.0219108	-0.0470548	-0.0609062	-0.0962041	-0.145385	-0.0570098	-0.0147775	-0.100788	-0.0201449	-0.0216173	-0.102069	-0.0420102	-0.0647747	-0.135526	-0.0941347	-0.0231579	-0.0867608	-0.019173	-0.0948118	-0.0709554	-0.0921789	-0.0287584	-0.108754	-0.0404967	-0.0727511	-0.0308732	-0.0254648	-0.00304906	-0.0470136	-0.0189669	0.0111195	-0.0414373	-0.0256552	-0.0344205	-0.036667	-0.0243269	-0.0612885	-0.0280515	0.00297053
115017	-0.0084264	0.0164619	0.0235791	-0.00992899	0.00998326	-0.00260641	0.0650916	0.0819609	0.0950573	-0.207853	-0.15569	-0.216333	-0.036219	-0.105452	-0.251524	-0.0211299	-0.0659973	-0.0228104	-0.0221589	-0.00151105	0.0489816	0.015902	0.0818006	-0.0514383	-0.0501425	-0.143221	-0.218793	-0.018912	-0.14324	0.00750076	0.00667076	-0.167245	0.0266745	0.0485656	-0.0746243	-0.0940147	-0.182875	-0.189102	-0.070554	-0.0455252	-0.0523519	-0.0772743	-0.08602	-0.202698	-0.234241	-0.212261	-0.169794	-0.037545	-0.130301
115219	-0.117268	-0.0329578	-0.222111	-0.173885	-0.247092	-0.0351634	-0.189467	-0.0546508	-0.0812291	-0.0315718	-0.0384385	-0.0552188	-0.124332	-0.166201	-0.20906	-0.0306783	-0.0889487	-0.0590317	-0.0651896	-0.0720556	-0.104764	-0.0127007	-0.140347	-0.0100612	-0.0359707	-0.101635	-0.198548	-0.135551	-0.13252	-0.178641	-0.262524	-0.104758	-0.103619	-0.0652048	-0.151098	-0.0267778	-0.00113829	-0.0771483	-0.108937	-0.103165	0.0220007	-0.0345977	0.0203748	-0.0559641	-0.141642	-0.07208	-0.0678199	0.0365198	-0.0161198
115320	-0.201635	0.0896753	-0.0783374	-0.152773	-0.0789091	-0.0113207	-0.0021001	0.133773	0.137784	-0.112504	-0.216567	-0.275684	-0.0261244	-0.0573916	-0.108263	-0.0824084	-0.0447898	-0.0870331	-0.0346725	-0.0298939	-0.01111	-0.0837069	-0.0548116	-0.0152561	-0.285382	-0.0926952	-0.0332394	-0.268636	-0.0576098	0.0176733	-0.105589	-0.117979	0.022958	0.0496645	-0.0439418	0.0381484	-0.146239	-0.202365	-0.0337341	-0.0403988	-0.00475042	-0.0460708	-0.0390929	-0.200301	-0.288139	-0.152693	-0.0840298	-0.0617985	-0.127512
115724	-0.153274	-0.12207	-0.245484	-0.206497	-0.232482	-0.190456	-0.199067	-0.020283	-0.0805998	-0.132941	-0.0364167	-0.1893	-0.174525	-0.201142	-0.245371	-0.212631	-0.258899	5.34779e-05	-0.143167	-0.154346	-0.148536	-0.142207	-0.0615375	-0.0913176	-0.138801	-0.161385	-0.229426	-0.202344	-0.0600559	0.0675504	-0.1968	-0.220671	0.0107252	0.03764	-0.0722322	-0.149445	-0.172374	-0.123716	-0.0957335	-0.107443	-0.0488447	-0.115979	-0.0839034	-0.18878	-0.139304	-0.166382	-0.150304	-0.174033	-0.148081
115825	0.0658103	-0.00296089	-0.215823	-0.163979	-0.151742	-0.0686421	-0.0970338	-0.179699	-0.156113	-0.109695	0.00617294	-0.105509	-0.10465	-0.106336	-0.0829285	-0.100835	-0.20146	-0.149861	-0.0804979	-0.0969094	-0.10374	-0.0859911	-0.106974	-0.13241	-0.2006	-0.0217527	-0.050948	-0.228208	-0.00649959	-0.0403337	-0.110937	-0.14467	-0.0570118	-0.171009	-0.132541	-0.148688	-0.0695783	-0.100343	-0.167687	-0.1502	-0.0199822	-0.0443795	0.0275478	-0.15412	-0.0283195	-0.0744794	-0.10388	-0.0113011	-0.040167
116524	-0.0443683	-0.00778646	-0.019831	0.0185949	-0.0188748	-0.023988	-0.0808224	0.0147572	0.0090419	-0.180441	-0.194893	-0.186871	-0.0363919	-0.100508	-0.132129	-0.0119806	-0.0776045	-0.0899086	-0.0432903	-0.012738	0.0220266	0.0350445	0.000919686	0.0218393	-0.130686	-0.055105	-0.146095	-0.168908	-0.0427999	-0.112243	0.0118999	-0.0622998	-0.00320765	-0.0450303	-0.0836432	-0.0864101	-0.107084	-0.130397	0.0688096	-0.0395075	-0.0209325	-0.0125847	-0.047138	-0.141373	-0.201518	-0.0526082	-0.103076	-0.0154685	-0.0343834
116726	-0.069867	-0.0311983	-0.155174	-0.0922782	-0.0709984	-0.107059	0.138999	-0.0415739	-0.0448288	-0.197416	-0.117152	-0.171421	-0.05824	-0.135813	-0.291009	-0.0996185	-0.181201	-0.0772956	-0.11368	-0.0508424	-0.13479	-0.0615231	-0.0685294	-0.103033	-0.244678	-0.0168195	-0.36772	-0.295409	-0.199845	0.0373114	-0.0903757	-0.157857	0.0610815	-0.196373	-0.224607	-0.171131	-0.127714	-0.351236	0.0123214	-0.0660647	-0.0394263	-0.0675902	-0.0628959	-0.0350045	-0.0760833	-0.155777	-0.106464	-0.14526	-0.0740203
117021	0.00781869	-0.02983	-0.144621	-0.00637433	-0.0640498	-0.0529482	-0.0481368	0.0691626	0.076825	-0.00171474	-0.094525	0.00385173	0.0267408	-0.113718	-0.211574	-0.0259789	-0.149234	-0.0201878	-0.0219596	-0.0363233	-0.0351624	-0.0638642	-0.00546213	0.0937841	-0.245186	-0.0616995	-0.0869182	-0.00226226	-0.109094	-0.0519802	-0.0613845	-0.18619	-0.0335988	0.0193334	-0.0334352	-0.090299	-0.127819	-0.210399	-0.0278824	-0.0903694	0.0253851	-0.0746229	0.0808151	-0.270603	-0.187805	-0.319245	-0.294706	-0.0236109	-0.0869107
117122	-0.0976945	-0.0330268	-0.239362	-0.143607	-0.164505	-0.110305	-0.0508782	-0.0134841	-0.036166	-0.217955	-0.146058	-0.149752	-0.109112	-0.0748676	-0.186923	-0.114148	-0.0964087	-0.0801321	-0.0788078	-0.124496	-0.0872889	-0.134236	-0.0635151	-0.0678546	-0.202299	-0.0498373	-0.14736	-0.138664	-0.143322	0.0418388	-0.0710478	-0.048783	0.0820881	-0.021253	-0.00671826	-0.12856	-0.160059	-0.181508	-0.0188657	-0.0609397	-0.0186884	-0.138215	-0.0541794	-0.153543	-0.201497	-0.161456	-0.212314	-0.109115	-0.159288
117324	-0.0471575	0.0268121	-0.0676382	-0.00635431	0.0055959	-0.0144815	-0.0295906	-0.0281396	-0.0459054	-0.110467	-0.0458553	-0.0599963	0.0453998	0.0525898	0.00943272	0.0380631	-0.0287697	-0.0551273	-0.00687454	-0.00284499	-0.00348104	-0.0378232	0.0696247	-0.0735017	-0.15313	-0.0274761	-0.0171832	-0.1254	0.0409538	0.0502398	0.0417367	0.00187446	0.0553915	0.0968277	0.0161867	0.0131513	-0.0697457	-0.124703	0.0263419	-0.0624103	-0.0464898	-0.0371941	-0.10753	-0.0967487	-0.0383501	0.0481933	-0.0259826	-0.0696019	-0.0544248
117930	-0.133608	-0.0313091	-0.20157	-0.128293	-0.0622679	0.00714988	-0.0554338	0.0733549	0.0943476	-0.362198	-0.342342	-0.144166	-0.0802603	-0.182682	-0.481116	-0.0598208	-0.149811	0.0316965	-0.0615482	0.0532516	0.0182163	-0.0113487	0.0253877	-0.116883	-0.300682	-0.214992	-0.380901	-0.382191	-0.248642	-0.150955	-0.196874	-0.392529	-0.0390217	-0.13454	-0.299633	-0.183086	-0.286998	-0.321572	0.0266531	-0.131276	-0.0942485	-0.0913833	-0.178606	-0.28119	-0.478931	-0.213669	-0.130718	-0.014126	-0.0367534
118023	-0.206727	0.0843442	0.016303	-0.240064	-0.226524	-0.086828	-0.056185	0.185163	0.184865	-0.30223	-0.285561	-0.444158	-0.136661	-0.0601762	-0.26597	-0.107262	-0.186451	-0.103691	-0.0602155	-0.0242557	-0.0155066	-0.126882	-0.0495054	-0.0374454	-0.332766	-0.298582	-0.214197	-0.0580053	-0.139141	-0.010149	0.238304	-0.236835	0.234364	-0.053903	-0.157546	-0.0256377	-0.0258078	-0.235517	0.155502	0.14276	0.182886	0.153517	-0.0727136	-0.308906	-0.217011	-0.140847	0.134441	0.015731	0.0868896
118124	0.0486403	0.0220254	-0.0174246	0.0370028	0.0337855	0.00875723	0.0408867	0.0596122	-0.00501343	-0.0211561	-0.0401293	-0.0933766	0.000126076	-0.0860368	-0.276901	0.00179207	-0.0495392	-0.069277	0.0280824	0.0413459	-0.0161352	-0.130496	0.0207277	0.0565362	-0.11762	-0.230689	-0.0805975	-0.157579	-0.267712	-0.157489	-0.0770514	-0.0704376	-0.069631	-0.233458	-0.224405	0.0593825	0.141289	0.0321988	-0.0141774	0.0294874	-0.0285248	0.0572737	0.020452	-0.258722	-0.041405	-0.194611	-0.0283284	-0.126465	-0.092396
118225	0.0233867	-0.00608701	-0.0236437	0.0101103	0.0121595	0.0602332	0.019785	-0.0148768	-0.00907367	-0.279277	-0.200149	-0.239666	-0.000184475	0.0508567	0.0432932	0.0276653	-0.0607587	-0.133633	-0.0716283	-0.00819232	0.010418	-0.0268521	0.0225543	0.0205236	-0.230787	-0.138627	-0.143625	-0.199845	0.00350677	0.00341973	0.0696192	-0.139919	0.0938341	0.0218085	-0.0749621	-0.00254103	0.0302719	-0.120409	0.0495036	0.0190654	0.0761114	-0.0996753	-0.00569346	-0.202945	-0.17539	0.0313194	-0.262586	-0.0609212	-0.149013
118528	-0.154679	-0.170915	-0.16775	-0.200782	-0.26627	-0.215337	-0.246092	0.132612	0.166985	-0.344525	-0.168855	-0.18776	-0.185004	-0.0415834	-0.252286	-0.240758	-0.206472	-0.315169	-0.244638	-0.208549	-0.234657	-0.202465	-0.130542	0.00286885	-0.241299	-0.0211723	-0.207211	-0.219528	-0.18973	0.178114	-0.0851848	-0.0013712	0.146457	0.0492784	-0.0318483	-0.00211763	-0.1881	-0.276162	0.0484453	0.0672387	0.00385	-0.246173	-0.142303	-0.292182	-0.259208	-0.27406	-0.265672	-0.186183	-0.188667
118730	0.0745383	0.0401318	-0.1124	0.0162129	0.0550859	0.0495947	0.0448095	0.12289	0.140796	-0.0446282	-0.154429	-0.218066	0.00479954	-0.194883	-0.221054	0.0397038	0.047107	0.00432824	0.00595816	0.00450346	0.100463	0.0296579	0.0075048	-0.00901152	0.0677263	-0.170544	-0.240185	-0.102694	-0.135919	-0.0581492	-0.0486084	-0.181306	-0.0525106	-0.0672903	-0.066919	-0.143292	-0.151106	-0.213369	0.0145589	-0.0845054	-0.0139571	-0.0289629	-0.166043	-0.26238	-0.131306	0.00222087	-0.0178331	-0.0244597	0.0403775
118831	-0.0575138	-0.0325946	-0.0118696	-0.0605157	-0.0293736	0.000968199	0.0895671	-0.0179379	-0.000235905	-0.10679	-0.0818651	-0.0924192	-0.0354621	-0.127629	-0.206946	-0.0360246	0.029621	-0.0171923	0.00411356	-0.0199004	-0.0413952	0.0344045	-0.0298419	0.0298851	-0.157136	-0.139	-0.192165	-0.163805	-0.121978	-0.0401383	-0.22846	-0.155269	-0.0682481	-0.0274034	-0.0702968	-0.0392606	-0.110204	-0.219788	0.121595	-0.0146069	0.0442916	-0.000914457	-0.043668	-0.153473	-0.0841476	-0.0487397	-0.0213934	-0.0934059	0.0153927
118932	-0.0363712	0.0215305	-0.111353	-0.0187426	-0.0125214	0.0422217	0.0504493	-0.00548131	0.0163	-0.140196	-0.20653	-0.184375	0.0096896	-0.0908929	-0.121236	-0.0147481	-0.107443	-0.00243115	0.0348482	0.00215341	-0.0134104	0.106205	0.0669096	-0.00516629	-0.215361	-0.157677	-0.163063	-0.192807	-0.213336	-0.000123467	-0.0307268	-0.133709	0.0514316	0.00974982	-0.061909	-0.0337135	-0.0202907	-0.107819	-0.054708	-0.0956723	-0.0255618	0.0122513	-0.0568355	-0.461115	-0.260095	-0.176878	-0.142777	0.0125857	-0.145433
119025	-0.0372232	0.0441979	-0.176855	-0.00644803	-0.0934659	-0.111404	-0.0547779	0.160152	0.0965729	-0.444461	-0.343434	-0.4683	-0.0589214	-0.00307151	-0.11968	-0.098963	-0.119774	0.0926362	-0.076953	-0.0638209	-0.13143	-0.346243	0.112239	-0.0226378	-0.590906	-0.373226	-0.393339	-0.325775	-0.293284	0.129357	0.062563	-0.278405	0.209182	0.14711	0.0469052	-0.185753	-0.256378	-0.369665	0.0367578	0.0317535	0.0427849	-0.178597	-0.281092	-0.522989	-0.3262	-0.218772	-0.480434	-0.208837	-0.0989387
119126	-0.0779824	0.0206322	-0.151017	-0.0406947	-0.10328	-0.0940213	-0.0248994	0.0201568	0.0735358	-0.190023	-0.161062	-0.306255	-0.0862622	0.045711	-0.110155	-0.143151	-0.0101042	-0.0664802	-0.126254	-0.0786294	-0.100228	-0.0662375	-0.097249	-0.168584	-0.298988	-0.172107	-0.0464203	-0.197663	-0.175514	0.0831664	0.0872405	-0.21271	0.111651	0.105098	0.0881453	-0.124863	-0.258342	-0.308859	-0.0772829	-0.218205	-0.0384368	-0.120753	-0.126416	-0.216831	-0.244845	-0.000940233	-0.133827	-0.217517	-0.0810663
120111	0.131525	-0.0791459	-0.0512621	0.139103	0.0938068	0.0762529	0.0179618	-0.0491591	0.0463454	-0.0137141	-0.0137442	-0.0497229	0.112043	-0.166852	-0.269472	-0.046804	-0.135779	-0.328285	0.0768669	0.0383049	0.113308	-0.147056	-0.123532	-0.0312519	-0.282764	0.0844397	-0.31758	-0.436949	-0.345684	-0.205369	-0.172074	-0.158697	-0.169951	-0.302472	-0.327843	-0.0742652	0.0396179	-0.181525	-0.0128372	-0.0230052	-0.000791273	0.0391512	0.030034	-0.119435	-0.177115	-0.207178	-0.103315	-0.0711179	-0.06498
120212	-0.0701227	0.0016569	-0.156902	-0.139856	-0.165448	-0.203699	-0.161489	0.00214652	-0.0330826	-0.254601	-0.248985	-0.336341	-0.190051	-0.0194489	-0.0964852	-0.213052	-0.153571	-0.219672	-0.137418	-0.195257	-0.141131	-0.0797663	0.0314297	-0.0620879	-0.377687	-0.11134	-0.172052	-0.317068	0.0487436	0.186632	0.179394	-0.298843	0.158497	0.0538933	-0.012244	-0.28191	-0.232098	-0.261634	-0.140535	-0.217005	-0.0894132	-0.219419	-0.170507	-0.380795	-0.25626	-0.442071	-0.276985	-0.350108	-0.125456
120414	0.00399366	-0.0614478	-0.0954427	-0.0600063	-0.0926916	-0.0863662	-0.148733	-0.0519066	-0.024147	-0.106051	-0.06025	-0.161407	-0.111817	0.00244076	-0.070335	-0.141067	-0.134139	-0.157852	-0.10393	-0.0883143	-0.0579096	-0.158171	-0.0645417	-0.0137876	-0.0558971	-0.11971	-0.0395165	-0.0961684	0.00356682	0.0154894	-0.0764159	0.00103484	0.0111312	0.0172165	-8.24028e-06	-0.0489796	-0.0105573	-0.00677911	-0.0397545	-0.0921054	-0.00848665	-0.0262396	-0.0716857	-0.162223	-0.0345174	-0.084186	-0.107532	-0.0413749	-0.023186
120515	-0.134769	0.0194841	-0.183742	-0.225275	-0.153506	-0.102278	-0.0903656	-0.123519	-0.0907349	-0.173419	-0.0383894	-0.159037	-0.123351	-0.0313748	-0.102292	-0.0681892	-0.112684	-0.0182247	0.0516809	-0.0255731	-0.0307859	-0.085972	-0.0228409	-0.0940701	-0.22123	-0.0406991	-0.125186	-0.127584	-0.0883715	0.0597592	0.0191351	-0.0759857	0.136198	0.183569	0.0722241	-0.116033	-0.110905	-0.185759	-0.0726495	-0.1956	-0.0948248	-0.133648	-0.177876	-0.254745	-0.18199	-0.137904	-0.215981	-0.103774	-0.100647
120717	-0.0458995	-0.0170785	-0.0884348	-0.0622615	-0.109211	-0.126743	-0.0450135	0.0990075	0.0992808	-0.127141	-0.135463	-0.185048	-0.108368	-0.0284473	-0.155202	-0.265778	-0.11056	-0.260386	-0.152153	-0.120579	-0.0636495	-0.0848767	-0.00171816	0.0312879	-0.139898	-0.13626	-0.208482	-0.0532017	-0.134146	0.0162314	-0.00382254	-0.132116	0.0628318	0.00178104	-0.015672	-0.0673789	-0.183079	-0.223394	-0.00760386	-0.0454013	0.0223533	-0.166129	-0.0945162	-0.192227	-0.326227	-0.174899	-0.122108	-0.199698	-0.188077
121416	-0.016817	-0.133428	-0.085123	-0.0594835	-0.0648628	-0.120192	-0.125722	0.129587	0.0328931	-0.08044	-0.136536	-0.257943	-0.0832774	-0.0694616	-0.164194	-0.136504	-0.0785875	-0.175051	-0.0627182	-0.181268	-0.156277	-0.162522	-0.166637	0.0930727	-0.207095	-0.0575295	-0.208077	-0.0954298	-0.185966	-0.166169	-0.0621449	-0.0489245	0.012793	-0.0170748	-0.0474353	0.0323087	-0.176007	-0.108745	0.0618125	0.0602808	0.0841858	-0.15257	0.0161922	-0.0703998	-0.19095	-0.124069	-0.179858	-0.158725	-0.124748
121618	-0.117414	-0.019284	-0.0676392	-0.105474	-0.0642393	0.00230328	-0.0816622	0.0230485	0.00694944	-0.138759	-0.162054	-0.157203	-0.0345469	-0.0670378	-0.196589	-0.0551213	-0.156158	-0.0531406	-0.0424143	-0.0313114	-0.110029	-0.0574757	-0.123073	0.0337553	-0.238291	-0.355139	-0.17784	-0.140627	-0.139422	0.0248921	-0.0345849	-0.152108	0.02457	-0.0271606	-0.0935727	-0.172226	-0.0981081	-0.127137	-0.160097	-0.0802917	0.0618839	-0.0714721	0.0151805	-0.219947	-0.254572	-0.16374	-0.324951	-0.0570401	-0.220401
121921	0.0296591	0.0468306	-0.0654747	-0.0205109	0.0457159	0.000202613	-0.0262566	0.034118	0.0396083	-0.0845582	-0.117001	-0.0434028	-0.023191	-0.0680619	-0.0965702	0.0271808	-0.0432332	-0.0677978	-0.00826427	-0.0227669	-0.000479097	-0.00542705	0.0593818	-0.0152872	-0.0702503	-0.0633843	-0.143501	-0.0437021	-0.148891	-0.0808743	-0.0763727	-0.0688661	-0.0308388	-0.0755703	-0.11008	0.00683462	0.019637	-0.0666158	0.0380861	-0.00178067	-0.0135961	-0.0353976	-0.0739868	-0.110667	-0.0419165	-0.0220148	-0.10009	-0.0470445	-0.0957043
122317	-0.0794478	0.0738712	-0.175874	-0.132428	-0.0713241	0.048933	0.0415724	-0.0207955	-0.0618348	-0.127587	-0.155191	-0.140991	-0.0963744	-0.0688747	-0.151777	-0.0212927	-0.0923711	-0.0314304	-0.0059125	0.0589176	-0.00274203	-0.0399702	0.0989474	0.0230876	-0.12994	-0.0607903	-0.0791765	-0.175606	-0.00335344	-0.0488635	-0.0215192	-0.150488	0.0368545	-0.0128278	-0.141459	-0.0673866	-0.0550594	-0.226598	-0.00704805	-0.109175	-0.0689606	0.0268675	-0.088514	-0.188172	-0.155314	-0.192796	-0.054947	0.0375611	-0.0616792
122620	-0.101152	0.0133312	-0.247485	-0.112337	-0.117591	-0.125396	-0.0493719	0.10235	0.0546161	-0.290815	-0.0697249	-0.333424	-0.055438	-0.1057	-0.327002	-0.116156	-0.131144	-0.0602064	-0.0577509	-0.10843	-0.112271	-0.0861946	-0.0420285	-0.077163	-0.151046	0.113664	-0.1664	-0.248432	-0.152536	-0.0312337	-0.175794	-0.108591	-0.0717622	-0.0859939	-0.110122	-0.0849868	-0.0822326	-0.132813	0.0313371	-0.0639026	0.0254521	-0.0422437	0.00529814	-0.0890234	-0.265262	-0.324392	-0.106943	-0.270295	-0.150356
122822	-0.164842	-0.0154046	-0.32287	-0.166728	-0.190846	-0.143032	-0.121662	-0.0179229	0.00647874	-0.325243	-0.351148	-0.338106	-0.135401	-0.134435	-0.255161	-0.20861	-0.0734658	-0.0844919	-0.118693	-0.159746	-0.0815722	-0.069359	-0.0263673	-0.0804849	-0.169421	-0.153252	-0.132855	-0.370857	-0.0976094	0.0384586	-0.0192555	-0.205917	-0.00613491	0.0679192	-0.0176093	-0.0356129	-0.250789	-0.297541	-0.215882	-0.206062	-0.097065	-0.148797	-0.257238	-0.32291	-0.142075	-0.0768198	-0.143174	-0.0261434	0.0657396
123117	-0.069114	0.0243781	-0.0902229	-0.0796115	-0.0945757	-0.112658	0.0462408	0.0177358	0.0228461	-0.253231	-0.377717	-0.345646	-0.0556197	0.012759	-0.153597	-0.0686585	-0.0293674	-0.0776983	-0.0393341	-0.0312191	-0.0323459	-0.0213354	0.0066019	0.0658262	-0.30172	-0.214806	-0.200934	-0.353937	-0.232156	0.0599671	0.0550452	-0.335605	0.0814323	-0.0611034	-0.117419	-0.217422	-0.242838	-0.248303	-0.150022	-0.144377	-0.0151537	-0.0113606	-0.0462189	-0.32372	-0.373214	-0.306719	-0.133601	-0.123486	-0.0920767
123420	-0.107342	0.0503725	0.00329549	-0.085008	-0.0669657	-0.0269962	-0.0164795	0.0760245	0.0283957	-0.0316359	-0.183255	-0.0934088	-0.0302233	-0.0358273	-0.07447	-0.0286415	-0.0344356	-0.0420992	-0.0140408	-0.0038894	0.020487	0.0259128	0.0161392	0.0572855	-0.0889407	0.0591265	-0.0647766	-0.0458848	-0.144319	0.00400723	0.0276063	-0.0722509	0.0163086	-0.035572	-0.14534	0.0483564	-0.0651674	-0.107146	-0.0051915	0.070268	0.0525362	0.00966194	0.0723155	-0.0134414	-0.115363	-0.137067	-0.131598	-0.029224	-0.0259498
123521	-0.127243	-0.120049	-0.0515709	-0.109351	-0.0967304	-0.0876076	-0.109944	0.0363322	-0.00441891	-0.35828	-0.106979	-0.137621	-0.0875416	0.101794	0.0944975	-0.0995766	-0.0700824	-0.286046	-0.11151	-0.119051	-0.0842567	-0.0771503	-0.130057	-0.01592	-0.313697	-0.299203	0.0150489	-0.252797	-0.00344526	-0.028857	0.0716552	-0.215921	-0.03842	0.122036	0.0968814	-0.0854944	-0.135056	-0.133092	-0.0713824	0.0720077	-0.0236412	-0.0893955	-0.178541	-0.11081	-0.103256	-0.0498765	-0.0997055	-0.144044	-0.0935774
123723	0.0914581	-0.155456	-0.0240231	0.00252965	-0.0803008	-0.190475	-0.138284	0.0204352	0.00899649	-0.147419	-0.0696774	-0.0755152	-0.0297779	-0.133539	-0.147181	-0.111318	-0.0840347	-0.106422	-0.127455	-0.143782	-0.0865062	-0.174254	-0.109516	-0.00158338	-0.243204	0.0180573	-0.310299	-0.235174	-0.0641766	-0.088188	-0.072428	-0.124293	-0.0250136	-0.178346	-0.215641	-0.0364856	-0.0792536	-0.121508	0.0273112	-0.0022018	-0.0209709	-0.0873433	0.0988489	-0.154791	-0.258556	-0.252984	-0.0916521	-0.0959676	-0.13029
123824	-0.174148	-0.0305277	-0.177656	-0.205664	-0.170546	-0.109653	-0.147613	-0.0435964	0.0031945	-0.179998	-0.0353128	-0.100699	-0.153918	-0.0296132	-0.129273	-0.132678	-0.0663766	-0.212817	-0.152039	-0.170999	-0.0668236	-0.0397483	-0.0740102	-0.0788841	-0.140363	-0.100194	-0.0147107	-0.07049	-0.0299651	0.0903556	-0.0249442	-0.164879	0.0719796	0.0464518	-0.00115234	-0.112319	-0.137054	-0.199128	0.0110973	-0.0331888	0.0558687	-0.133125	-0.0656208	-0.105767	-0.125644	-0.10813	-0.060252	-0.0595524	-0.24202
123925	-0.0354572	-0.0151738	-0.146214	-0.0155573	-0.0146575	-0.0334275	-0.049189	0.0328797	0.0254093	-0.078744	-0.0141063	-0.0141531	-0.0255031	0.0115296	-0.0592794	-0.0644777	-0.102556	-0.0540123	-0.0499891	-0.035559	-0.0410923	-0.0517396	0.00470149	0.0276381	-0.0910374	0.0354526	-0.0990297	-0.00183462	-0.0397838	5.5939e-05	0.0537017	-0.0449841	0.069797	0.026163	-0.0229748	-0.0174243	-0.13419	-0.148479	-0.00192915	0.0150777	-0.038905	-0.104558	-0.0530392	-0.11132	-0.0897331	-0.127131	-0.0664649	-0.0718697	-0.1292
124422	-0.0676428	0.00940176	-0.110708	-0.0523433	-0.0374826	-0.0461177	-0.0472669	0.0399934	0.0532101	0.00242426	-0.183381	-0.202563	-0.0701045	-0.0799997	-0.101993	-0.100918	-0.133575	-0.0183904	-0.0843931	-0.0536486	0.00783284	-0.017788	-0.0546203	0.064322	-0.0792937	0.148224	-0.104606	-0.0342767	-0.0768224	0.0192602	-0.048352	-0.089117	-0.0363701	-0.0274561	-0.0786805	-0.0630364	-0.18209	-0.177778	-0.0241984	-0.0608326	-0.0146523	-0.014107	0.0261237	-0.134162	-0.0262531	-0.0532462	-0.155809	-0.106233	-0.105447
124624	-0.0313906	-0.0849233	-0.0141762	-0.00360234	0.0207696	0.0871627	0.121007	-0.0707659	-0.101145	-0.0450315	-0.0802289	-0.122073	0.0753	-0.0694676	0.0060516	0.0729822	0.0649097	0.00179284	0.0488287	0.0815684	0.0279474	0.063878	-0.0376519	0.0796273	-0.215974	-0.0397443	-0.196706	-0.193273	-0.0801293	-0.16649	-0.169852	0.0330772	-0.134776	-0.0172532	-0.0122801	-0.063078	0.0247916	-0.0439464	-0.018112	-0.0524785	0.0384289	-0.0696945	0.00675794	-0.122861	-0.237175	-0.0371868	-0.192305	-0.0601041	-0.0408255
124826	-0.0418823	0.00333559	-0.111651	-0.0659987	-0.103115	-0.101782	-0.0303465	0.100454	0.124879	-0.138748	0.127992	0.0407191	-0.062137	-0.133896	-0.301696	-0.0538075	-0.115542	-0.04808	-0.0731951	-0.0592537	-0.0593419	-0.11984	-0.0222087	-0.0302252	-0.198438	0.050018	-0.227024	-0.0600921	-0.284805	-0.137868	-0.0351249	-0.170914	-0.0486728	-0.0917896	-0.22485	0.00434086	-0.0027485	-0.070119	0.0515393	0.0535234	0.051999	-0.0216925	0.0376781	-0.122117	-0.0736147	-0.302397	-0.0284432	-0.0643183	0.00699935
125222	-0.0292013	-0.0239873	-0.019504	-0.0692979	-0.0468949	0.0257303	-0.0271906	0.124675	0.13288	-0.0231998	-0.136448	-0.0951814	-0.0658031	-0.171263	-0.137501	0.00266571	-0.0110565	-0.167671	0.00382556	-0.0240555	-0.0466597	-0.0552857	0.0132276	0.0668704	-0.157375	0.053497	-0.196321	-0.115045	-0.137182	0.0152685	-0.131088	-0.276637	-0.0118729	-0.0533355	-0.145742	-0.234729	-0.178949	-0.307141	-0.0257942	-0.197645	-0.116886	0.0231217	0.110629	-0.225533	-0.242622	-0.178351	-0.0627646	-0.0542419	-0.105362
125424	-0.123944	-0.0329212	-0.0945351	-0.165249	-0.172732	-0.134516	-0.140438	-0.0346518	-0.0345718	-0.246298	-0.0217115	-0.0785458	-0.0966541	0.0165116	-0.0747529	-0.0916185	-0.148235	-0.112853	-0.0576507	-0.0841367	-0.079981	-0.113271	-0.0372508	-0.0685431	-0.0176391	-0.0138838	0.0612175	-0.0381078	0.00705266	0.0800546	0.0198145	0.046093	0.0735952	0.0245041	-0.00544895	-0.102421	-0.0499295	-0.156433	0.0143141	-0.0134257	-0.0250031	-0.0438366	-0.0464461	-0.114023	-0.119843	-0.0690282	-0.0871258	-0.0916706	-0.0375532
125525	-0.177742	-0.0376804	-0.165981	-0.244159	-0.240345	-0.172798	-0.143023	0.0164138	0.0108987	-0.145211	-0.0119086	-0.0435287	-0.127437	-0.136878	-0.261467	-0.146423	-0.0185004	-0.0789633	-0.115089	-0.169451	0.014832	-0.113312	-0.0376148	0.0385641	-0.156944	-0.0765866	-0.0171702	-0.213116	-0.139371	0.00726423	-0.152904	-0.108534	0.00731928	0.0565603	0.0137342	-0.122294	-0.0984985	-0.123579	-0.0271487	0.0123864	-0.0402205	-0.140641	-0.0165902	-0.0989284	-0.223474	-0.177146	-0.104627	-0.129857	-0.0870365
126325	-0.0293902	0.0305698	-0.0515974	-0.00337783	-0.0157376	-0.000682416	-0.0631597	0.0538999	0.0632452	-0.0884724	-0.00182475	-0.0453069	0.0917403	-0.203614	-0.370404	0.0527208	-0.0282973	-0.0619137	0.0369882	-0.021858	-0.030729	-0.00999838	0.0248284	-0.0244872	-0.218578	-0.095875	-0.125272	-0.205681	-0.275782	-0.18364	-0.158851	-0.189378	-0.16605	-0.142651	-0.279575	0.00521108	0.00277303	-0.10085	0.126694	0.00594248	0.0576622	0.111073	0.0745293	-0.227882	-0.20165	-0.304175	-0.0503357	-0.0220075	0.0659419
126426	-0.0810121	-0.0681006	-0.119643	-0.150257	-0.153146	-0.131667	-0.0752178	-0.0884128	-0.0605115	-0.167849	-0.0919202	-0.195811	-0.127992	0.00126681	-0.157725	-0.110739	-0.086977	-0.0447694	-0.0576473	-0.0247068	-0.0516002	-0.0605996	-0.0510996	0.000187834	-0.199331	0.0277595	-0.126995	-0.102007	-0.186736	-0.000171851	-0.0916967	-0.022974	-0.0155221	0.0840278	-0.0528943	-0.138871	-0.139181	-0.14013	-0.0661457	-0.183337	-0.103454	-0.0980612	-0.0219428	-0.084512	-0.172513	-0.114464	-0.190087	-0.096381	-0.113854
126628	-0.05689	-0.0200173	-0.15785	-0.107592	-0.142043	-0.101003	-0.0854012	0.0348992	0.0623864	-0.0759623	-0.0426636	-0.0686067	-0.167384	-0.0635243	-0.109236	-0.106284	-0.0853768	-0.0948988	-0.0876435	-0.0588122	-0.0178492	-0.0494995	-0.053982	0.00480159	-0.102275	-0.0756003	-0.138462	-0.110076	-0.0576209	0.000630334	-0.0720181	-0.0230815	0.0105403	-0.0104697	-0.0771925	0.0452043	-0.0366143	-0.0570655	0.0224577	0.0807988	0.0564919	-0.0269114	-0.0360708	-0.129489	-0.0456596	-0.0937217	-0.109206	-0.0319686	-0.049201
127226	-0.151103	0.0659034	-0.182288	-0.122813	-0.173285	-0.144202	-0.0434002	0.0980645	0.101467	-0.247372	-0.251212	-0.190887	-0.14932	-0.019043	-0.311602	-0.193803	-0.000299356	-0.091641	-0.124225	-0.0798555	-0.0123351	-0.10037	0.00980165	-0.0783714	-0.273107	-0.227414	-0.229424	-0.125181	-0.205925	-0.0332135	0.172405	-0.225909	0.06632	-0.0338282	-0.0944522	-0.267845	-0.329542	-0.39535	0.0299031	-0.045855	0.0413778	-0.183004	-0.125102	-0.285367	-0.225846	-0.309754	-0.0912955	-0.017063	-0.170934
127327	-0.0666541	0.0528778	-0.167381	-0.00797696	0.0206325	0.0656555	0.0753436	0.0915155	0.072813	-0.0229629	0.101145	0.0532392	-0.0271231	-0.201347	-0.42482	0.0496686	0.057688	0.179174	0.0641599	0.0652573	0.0591569	0.0174757	-0.0354753	-0.0203461	-0.183797	-0.161946	0.000764371	-0.138037	-0.434191	-0.0955073	-0.102807	-0.253353	0.00572204	-0.159888	-0.304714	-0.186619	-0.15031	-0.33289	-0.0497237	-0.214617	0.00233789	0.0144316	0.0829308	-0.132549	-0.0416241	-0.105151	-0.408492	-0.104671	0.0546117
127630	-0.0752347	-0.0694673	-0.0774821	-0.0799593	-0.0614535	-0.0291671	-0.157213	0.053081	0.0871856	-0.199422	-0.0802119	-0.211645	-0.013866	-0.079013	-0.132412	-0.0844431	-0.0791771	-0.106594	-0.0415791	-0.0607599	-0.128003	-0.115814	-0.12476	0.0704796	-0.190236	-0.17585	-0.279434	0.00110979	-0.0981535	-0.0903918	-0.0443308	-0.110164	0.0116538	-0.0164042	-0.130883	0.0110095	0.00308184	-0.112353	0.086532	-0.101801	0.0586317	-0.0332523	-0.0831381	-0.1549	-0.192321	-0.129616	-0.0168522	-0.0826606	0.00344678
127731	0.00784132	-0.0287073	-0.0860395	-0.0369576	-0.0640322	-0.0348624	0.00583775	0.009017	0.00246923	-0.0792856	0.00713328	-0.0903857	-0.0625311	-0.0951177	-0.14237	0.0184429	0.0246163	-0.0674937	0.00697545	-0.0436017	-0.0607074	-0.0973698	-0.0229039	-0.0146594	-0.150627	-0.00496051	-0.0768194	-0.0425058	-0.0599052	-0.0128036	-0.0153898	-0.115476	-0.0383202	-0.00415685	-0.0684486	-0.0985947	-0.159401	-0.185086	-0.0986028	-0.149707	-0.0135339	-0.113999	-0.0192051	-0.0658766	-0.0781206	-0.064162	-0.0414584	-0.112972	-0.0299055
127832	-0.146527	-0.0283814	-0.28093	-0.104025	-0.0775168	-0.047059	-0.0118631	0.0622999	0.012159	-0.261356	-0.202068	-0.249661	-0.0819351	-0.0568878	-0.203857	-0.0831815	-0.0934652	-0.0335474	-0.0963599	-0.101209	-0.0608978	-0.0178673	-0.161328	-0.0306902	-0.0289551	-0.0274127	-0.224473	0.00647559	0.00399799	-0.0103076	-0.0489595	-0.152064	-0.0143715	-0.0062291	-0.140533	-0.0382085	-0.122138	-0.328369	-0.118893	-0.0245334	0.00564937	-0.10525	-0.16452	-0.236161	-0.402017	-0.307514	-0.13268	-0.0867885	-0.183517
127933	0.0550151	0.0508216	0.0100421	0.101557	0.0599862	0.0360028	0.0701151	0.0572039	0.0874121	-0.0419888	-0.0256856	0.0407809	0.0829408	-0.065904	-0.109543	0.0262805	-0.0754998	-0.100149	0.0227485	-0.0169912	0.0268208	-0.0498302	0.0114926	0.0114195	-0.0956265	-0.143098	-0.253924	-0.0192807	-0.239669	-0.140746	-0.0565497	-0.180716	-0.0587839	-0.0909454	-0.123042	-0.024446	-0.0679054	-0.128061	0.0709638	0.0435814	0.075141	0.00909792	0.0623059	-0.176336	-0.163093	-0.17732	-0.0743717	-0.0200709	0.017281
128026	-0.00793675	0.00457487	-0.0389154	-0.0469681	-0.0360268	0.00529908	-0.00552862	-0.092485	-0.0997163	-0.0236247	-0.0174802	-0.027381	0.00208141	-0.0513807	-0.0525791	0.00876588	0.018024	-0.0772146	0.00363922	0.000943925	0.0271898	-0.0129765	-0.040857	-0.075105	0.0303491	-0.0955492	-0.126713	-0.0961953	-0.0786289	-0.134434	-0.12243	-0.012679	-0.121422	-0.074087	-0.147823	-0.0506917	0.00396805	-0.0846094	-0.0313812	-0.0550432	0.0121236	-0.0327029	-0.00555766	-0.0987598	-0.00820761	0.000962949	-0.0526912	1.45902e-05	-0.0315079
128127	-0.0176277	0.00352641	-0.0524506	-0.0477979	-0.0315262	-0.0399308	-0.0262504	0.018869	0.0432716	-0.0505401	-0.0124081	-0.00399523	0.0222925	-0.125752	-0.127372	0.00469161	-0.0826012	0.00700022	-0.0327756	-0.0162226	-0.00809743	-0.0363348	0.026351	-0.0676763	-0.0317631	0.041246	-0.138275	-0.124491	-0.135608	-0.0805271	-0.0570084	-0.0923154	-0.0742126	-0.0729621	-0.0761628	-0.0157813	-0.0271185	-0.0762331	-0.0419948	0.00942324	0.00544007	-0.0429081	-0.0589518	-0.113642	-0.133517	-0.152426	-0.036111	-0.0358363	-0.0897142
128632	-0.0903646	-0.022525	-0.115334	-0.136825	-0.108322	-0.0505578	-0.10979	0.097945	0.0945538	-0.221819	-0.0222406	-0.120245	-0.0854208	0.0529053	-0.0560522	-0.0516409	-0.00217983	-0.017213	-0.0429641	-0.0159481	-0.0285137	0.0117761	-0.0310211	-0.00356965	-0.108874	-0.0796847	-0.0966292	-0.0610995	-0.097752	0.108968	-0.0165057	-0.00266259	0.0862824	0.0751674	0.0821569	-0.120129	-0.0879486	-0.157131	-0.0885926	0.0372894	-0.0164972	-0.0667366	0.022319	-0.0631531	-0.179831	-0.109496	-0.052894	-0.0141703	-0.0540953
128935	-0.0488726	0.0089575	0.140798	0.0575725	0.00744233	0.00375556	-0.06402	0.126251	0.162668	-0.283508	-0.230959	-0.415943	0.0520615	0.0110149	-0.00246333	0.116933	0.073606	-0.0106896	0.0407254	0.0482472	0.0501743	-0.0629533	0.0689464	-0.0483333	-0.15908	-0.140002	-0.074132	-0.276277	-0.14971	-0.021478	0.273424	-0.0618664	0.155177	-0.134723	-0.258344	0.0744017	-0.180222	-0.228225	-0.0024427	0.050562	-0.060323	0.0883425	-0.271721	-0.359439	0.0261061	-0.120626	0.0612634	0.0903541	0.113486
129028	-0.106809	0.026699	-0.0793518	-0.0413747	-0.0217212	-0.014213	-0.0240171	0.0927554	0.0986084	-0.0768475	-0.156163	-0.296296	-0.0467682	-0.211374	-0.245727	-0.0429026	-0.0852174	-0.196327	-0.0139069	-0.0571079	-0.0488775	-0.0508725	0.0686509	0.0215981	-0.127593	0.0171533	-0.169197	-0.0479765	-0.0772716	-0.140112	-0.167176	-0.232841	-0.129433	-0.177119	-0.249043	-0.0423989	-0.0270799	-0.156527	0.0334014	-0.0440076	0.0614409	-0.00723436	0.0564428	-0.101763	0.00105604	-0.0364968	-0.0403503	-0.0193534	-0.00647676
129129	-0.0957368	-0.0293969	-0.205137	-0.141393	-0.136923	-0.0724977	-0.0803923	0.0298935	0.0190591	-0.0848162	-0.0853952	-0.0329854	-0.11226	-0.125019	-0.146815	-0.0966099	-0.0708704	-0.0314469	-0.0755595	-0.0536165	-0.0846754	-0.0403361	-0.0608442	-0.0296078	-0.0438858	-0.0523345	-0.0670158	-0.0349935	-0.0484704	0.0298161	0.00330384	-0.132925	-0.0425877	0.0582341	-0.0122257	-0.0702385	-0.114427	-0.145335	0.0206222	-0.0694754	0.0373458	-0.0236837	-0.0318715	-0.0955891	-0.149771	-0.188315	-0.0403744	-0.051619	-0.0557496
129331	-0.0733643	0.0104408	-0.0822138	-0.0213759	-0.0699668	-0.0579371	-0.0836512	0.0309322	0.0411028	-0.197833	-0.037082	-0.12874	-0.100415	-0.00516898	-0.10591	-0.0692959	-0.0214958	-0.0755582	-0.0478518	-0.0268393	-0.0656651	-0.102468	0.00927624	-0.140078	-0.231244	-0.0846706	-0.149753	-0.124228	-0.11888	0.00907205	0.0335896	-0.101804	0.0544518	-0.00112271	-0.057919	-0.0438022	-0.168906	-0.276606	-0.0680721	-0.151852	-0.0138145	0.00983982	-0.0989655	-0.160269	-0.14749	0.00665848	0.0150059	0.0571301	0.0133943
129634	-0.19932	-0.0838738	-0.187025	-0.216556	-0.179267	-0.111531	-0.148302	-0.01708	-0.0292105	-0.356679	-0.0928563	-0.238504	-0.201941	-0.025515	-0.0928693	-0.152903	-0.119658	-0.0426368	-0.136597	-0.106403	-0.0720552	-0.0860944	-0.110343	-0.00382913	-0.0757586	-0.0473368	0.0211325	-0.140004	-0.0214262	0.145263	-0.0845911	-0.0431544	0.110048	0.136831	0.0592033	-0.0828093	-0.0594489	-0.0876344	-0.12141	-0.0514647	-0.0170262	-0.112277	-0.146652	-0.16605	-0.155125	-0.114142	-0.181734	-0.135181	-0.121811
130013	-0.0729185	-0.0227663	-0.0526828	-0.0643625	-0.0988997	-0.0381128	-0.0884045	0.0141471	0.0158674	-0.105219	-0.123323	-0.281097	-0.0675544	-0.118155	-0.237828	-0.091662	-0.202678	0.0318875	-0.0829023	-0.066656	-0.0458246	-0.0927359	0.0114562	-0.0598109	-0.207926	-0.292864	-0.174869	-0.0757984	-0.146376	-0.00952216	-0.100349	-0.261462	-0.0267937	-0.0679969	-0.156406	-0.0561852	-0.0343579	-0.107575	-0.0093174	-0.0089159	0.0653913	-0.0490072	-0.00657562	-0.277055	-0.114352	-0.255623	0.0179853	0.00530128	-0.0833752
130114	-0.0179832	0.0577922	0.0551092	0.0509787	0.0445207	0.0255063	0.0486091	0.00320704	0.0188223	-0.0778546	-0.0342828	-0.0732818	0.0516392	0.0328903	-0.0474123	-0.0068356	-0.044684	0.0493398	0.044428	0.0176194	0.017261	0.03598	0.0543429	-0.0195581	-0.0366843	-0.0564741	-0.0339814	-0.046483	-0.0456696	-0.0228097	0.0316898	-0.0937459	0.0117426	-0.00523439	-0.0240302	0.0368382	-0.0310858	-0.0777012	0.0690293	-0.0336439	-0.0202244	0.0224581	-0.0375108	-0.0812072	0.0201719	-0.0202991	0.0221152	-0.0177557	0.034831
130316	-0.080588	0.0413817	-0.116737	-0.0957314	-0.063211	-0.000341278	0.0705318	-0.0718011	-0.0913232	-0.0767635	-0.0697418	0.0368627	-0.027535	-0.115101	-0.175353	-0.0369349	-0.0246516	0.0463374	-0.00247563	0.00921778	-0.0216474	-0.0124225	0.021804	-3.62658e-06	-0.0727104	-0.0642375	-0.181234	-0.143614	-0.136419	-0.0220372	-0.0750405	-0.103114	-0.0432654	-0.0524695	0.00152765	-0.0534314	-0.0772013	-0.118368	-0.10085	-0.0368273	-0.0277206	-0.0542273	-0.0880727	-0.225295	-0.181077	-0.197155	-0.0801069	-0.00932679	-0.0997289
130417	0.010814	-0.0024325	-0.0504757	0.00769082	-0.0410209	-0.0823691	0.00812205	-0.0562769	-0.038766	-0.0728675	-0.0559202	-0.0793537	0.0278649	-0.135856	-0.107428	-0.0129236	-0.090674	-0.0945893	-0.0410814	-0.033941	-0.0983033	-0.0698556	-0.0689061	0.0451217	-0.116189	-0.0409759	-0.144425	-0.106868	-0.214049	-0.110046	0.0241379	-0.24393	-0.0749876	-0.070155	-0.217204	-0.0741266	-0.0613611	-0.137297	0.0119151	-0.116562	0.0136841	0.00862119	-0.0065523	0.0136612	0.0273604	-0.0943735	-0.0341402	-0.0584746	-0.00188607
130518	0.010307	0.0100875	-0.081552	-0.0535171	-0.00349436	0.0783556	-0.0593801	-0.0460574	-0.0704189	-0.00572961	-0.00604137	-0.0622906	-0.028706	-0.0840601	-0.0651194	0.0209315	0.00622063	-0.0910553	-0.00297526	0.0393257	0.00910174	0.0283502	0.0236313	-0.0254231	-0.0718437	-0.0136505	-0.0244658	-0.0860807	-0.0154532	-0.016074	-0.0459348	0.010683	-0.0335779	-0.000352754	-0.0885231	-0.0540956	-0.0129242	-0.0255763	-0.107529	-0.0587215	0.0275934	-0.00825064	0.0246402	-0.0645774	-0.0122439	0.0534858	0.041519	0.0479431	0.0419127
130619	-0.194953	-0.0431047	-0.170352	-0.234605	-0.224248	-0.184895	-0.208224	-0.0101404	-0.0143925	-0.235905	-0.120653	-0.258293	-0.143597	-0.0737484	-0.0691015	-0.0564078	-0.0611704	-0.102108	-0.111644	-0.128453	-0.085529	-0.144346	-0.0870313	-0.124841	-0.172728	-0.161926	-0.222207	-0.12872	-0.139516	0.063312	-0.0263128	-0.113219	0.119491	-0.0508149	0.00672413	-0.293911	-0.293348	-0.411739	-0.110442	-0.169629	-0.128946	-0.109538	-0.168551	-0.301014	-0.199237	-0.214783	-0.161194	-0.127557	-0.100262
130720	-0.0600308	0.0979772	-0.100251	-0.00836139	-0.0505879	-0.033052	0.0746324	0.151798	0.0977416	-0.150038	-0.0463737	-0.108183	-0.0281396	-0.0549755	-0.264233	-0.0734764	-0.0652716	0.00274873	-0.0488423	0.0105048	0.0566561	-0.0311316	0.144265	-0.0208795	-0.130117	-0.00710205	-0.230789	0.106839	-0.140219	0.0105055	0.0306443	-0.266085	0.120093	-0.0545626	-0.0525719	0.000482855	-0.0815794	-0.180647	0.03846	-0.0729217	0.0404933	-0.0276791	-0.0167059	-0.244126	-0.139299	-0.229938	-0.156732	-0.0263453	-0.0608546
130821	-0.0363097	0.00435388	-0.140323	-0.0576243	-0.15716	-0.0929446	0.046491	0.0365216	-0.00351587	0.0181281	-0.0276677	-0.140105	-0.0640604	-0.177679	-0.192758	-0.0490022	-0.0442615	0.0294915	-0.0286857	-0.0854921	-0.0751001	-0.0928963	-0.0187946	0.0532114	-0.0568609	0.120709	-0.150216	-0.043492	-0.184353	-0.130782	-0.121912	-0.154707	-0.0698367	-0.101512	-0.13798	-0.113777	-0.0678348	-0.0929603	-0.0609811	-0.0641323	0.0815135	0.00149575	0.0442419	-0.0578119	-0.0955128	-0.137391	-0.0937438	-0.0379645	-0.0256691
130922	-0.199695	0.045054	-0.298806	-0.243376	-0.128468	-0.0521773	-0.0236556	0.0618044	0.0337218	-0.327618	-0.244361	-0.258629	-0.157022	-0.14357	-0.252619	-0.144448	-0.197468	0.0185013	-0.0977402	-0.0930383	-0.0658934	-0.0287549	0.08477	-0.108061	-0.3458	-0.00833349	-0.259383	-0.0423388	-0.039639	0.0705275	-0.0863518	-0.146317	0.197371	-0.0345353	-0.113909	-0.140933	-0.275785	-0.305306	0.00920653	-0.0286906	0.0279491	-0.0394623	-0.222502	-0.195326	-0.245513	-0.32324	-0.16924	-0.167329	-0.204099
131217	-0.0174913	-0.0023685	-0.185626	-0.0541065	-0.0475622	0.0172805	0.00258839	0.0038653	0.0233435	-0.0855095	-0.00749701	-0.0386087	-0.0540397	-0.0843739	-0.170395	-0.0659699	-0.131694	-0.0944545	-0.0756189	-0.0426986	-0.0323585	-0.00358329	0.0405838	-0.0775212	-0.132319	-0.0688786	-0.151308	-0.117498	-0.0500999	-0.0759501	-0.0485867	-0.112359	-0.0646205	-0.0537745	-0.0647246	-0.196668	-0.134511	-0.11684	-0.0974291	-0.081199	-0.0301432	-0.132735	-0.010966	-0.157828	-0.216217	-0.0852961	-0.097929	-0.0640147	-0.13944
131419	-0.154644	0.0627139	-0.327375	-0.245019	-0.287455	-0.131884	-0.0632169	0.0396081	0.0740361	-0.172395	-0.0173773	-0.124671	-0.219184	-0.200791	-0.232257	-0.170555	-0.109596	0.105823	-0.152638	-0.0935146	-0.0483015	-0.0147719	0.078888	-0.00157052	-0.0409301	0.0355226	-0.332273	-0.0644986	-0.124896	-0.0325723	0.0488504	-0.259126	0.0195525	-0.00472804	-0.0533153	-0.287297	-0.161577	-0.263195	0.0281641	0.047729	0.0638631	-0.218065	-0.031844	-0.178917	-0.262944	-0.151858	-0.0155859	-0.0470117	-0.127209
131722	-0.147621	0.010062	-0.109361	-0.0916332	-0.0778397	-0.0352006	-0.0645003	0.0767065	0.0681114	-0.267027	-0.0415665	-0.187602	-0.0059832	-0.081592	-0.101756	-0.0211995	-0.0690887	-0.05627	0.039937	0.00667957	-0.064454	-0.116288	-0.00316477	0.0118928	-0.230469	-0.123678	-0.0162317	-0.197413	-0.0145058	0.117232	0.0317774	-0.126005	0.144866	-0.0044359	0.0419016	-0.1409	-0.231344	-0.339104	-0.104347	-0.0976769	0.0290806	-0.0637497	-0.131015	-0.22345	-0.24648	-0.26152	-0.0408769	-0.0170525	-0.114311
131823	-0.0709366	-0.039081	-0.143893	-0.0799954	-0.0689115	-0.0640855	0.0171444	-0.0433738	-0.0359498	-0.121722	-0.0901309	-0.187598	-0.0494757	-0.0485949	-0.100596	-0.0890013	-0.00214326	-0.0205521	-0.0746395	0.00695452	-0.0567582	-0.0413764	-0.0266308	-0.0109958	-0.117469	0.0227401	-0.17184	-0.102287	-0.0166281	0.0206725	-0.0341785	-0.151325	0.0154457	0.00136472	-0.0417982	-0.118989	-0.0999056	-0.126095	-0.0353459	-0.129006	0.000222743	-0.0435531	-0.0188805	-0.170785	-0.107337	-0.0598246	-0.0964997	-0.0395668	-0.0506775
131924	-0.0493419	-0.0318045	-0.0212673	-0.0676799	-0.0121939	-0.00400397	-0.000537122	0.0344431	0.0118281	-0.0386603	-0.0156562	-0.125981	-0.0225108	0.045455	-0.0604336	-0.0378927	-0.201389	-0.0791563	-0.0421022	0.00655244	0.0192225	-0.018603	-0.0536736	-0.0101199	-0.143774	-0.151809	-0.125457	-0.0779537	-0.170777	-0.0140074	0.00627159	-0.0420238	0.0774025	0.0221094	-0.118581	-0.0297491	0.0126612	0.0100826	0.0747391	0.0139027	0.00818073	0.0547294	-0.0286383	-0.183806	0.0343163	-0.169997	0.0045183	0.0582455	-0.0131222
132017	-0.0592039	0.0211952	-0.146559	-0.0280083	0.0328632	0.0603567	0.0364384	0.0502637	0.0472238	-0.0650761	-0.159673	-0.101511	-0.0160128	-0.135714	-0.11987	-0.00400707	0.0622303	0.0687194	0.0200054	0.0475244	0.0753798	0.0900247	0.0542066	-0.0331704	-0.0440048	-0.0641228	-0.143523	0.0323693	-0.0492357	-0.00773031	-0.0873652	-0.0968544	-0.0275289	-0.0206187	-0.0458128	-0.119075	-0.13396	-0.168912	0.0683044	-0.152105	0.00163564	0.0677632	-0.0678123	-0.140042	-0.103921	-0.119395	0.0760914	0.0593073	-0.00413569
132118	-0.0331222	-0.00647491	0.0218886	-0.0399506	0.022669	0.0830065	0.0441634	-0.0621128	-0.0547659	0.0144859	-0.289155	-0.295689	0.0801352	-0.178263	-0.238667	0.0301061	0.028485	-0.111846	0.042045	0.164586	0.157345	0.052233	0.0433318	-0.0496262	-0.0321783	-0.207187	-0.176885	-0.335175	-0.233852	-0.257616	-0.242444	0.0447584	-0.220595	-0.136012	-0.153421	0.0495115	0.0835982	-0.0619022	0.0336177	0.0388558	-0.0324768	0.111213	0.0861588	-0.239134	-0.194204	-0.305009	0.114636	0.0676685	0.0409597
133019	-0.0524122	-0.00873703	-0.0872417	-0.0550818	-0.0847347	-0.083543	-0.0140436	-0.0133386	0.000196616	-0.162174	-0.142367	-0.173663	0.00511363	-0.0463175	-0.0999393	-0.08748	-0.0698673	-0.122473	-0.0419746	-0.0893936	-0.0489278	-0.0170839	-0.0256042	-0.0321951	-0.13443	-0.113195	-0.059139	-0.128005	-0.0136846	0.0727249	-0.125717	-0.0596294	0.0439576	0.0729729	-0.000717689	-0.00631605	-0.0571999	-0.0814078	0.0981559	-0.0221572	-0.00527291	0.00784495	-0.0479792	-0.152206	-0.0180071	0.00880801	-0.134771	-0.130807	0.0242159
133625	-0.066524	0.00688362	-0.141263	-0.0652318	-0.0838378	-0.0660045	-0.0667726	0.0758663	0.0778014	-0.0594441	-0.198707	-0.254585	-0.0915587	-0.121644	-0.161096	-0.118496	-0.0896409	-0.0369971	-0.0716696	-0.0560723	-0.0621366	-0.0183181	0.00379142	-0.0217144	-0.0637174	-0.126098	-0.09221	-0.0531119	-0.0469744	0.0180353	-0.0468066	-0.172515	-0.0155971	-0.0462263	-0.13514	0.0317734	-0.078367	-0.198574	0.0660116	-0.0697697	-0.00372813	0.0527007	-0.0536328	-0.231392	-0.105716	-0.12853	0.0384153	0.0353182	0.0178705
133827	-0.0683007	-0.0241021	-0.0531437	-0.0835042	-0.0674616	-0.00496171	-0.0523346	0.0269744	-0.000495188	-0.0365171	-0.0123649	-0.0366448	-0.0637607	-0.0704426	-0.138322	-0.0351395	-0.00644993	-0.150283	-0.0211394	-0.010888	-0.0498053	-0.0548836	-0.00583948	-0.00227943	-0.0449089	-0.0239407	-0.156081	-0.0484957	-0.109253	-0.0877553	-0.0594493	-0.0612989	-0.0404284	-0.0112959	-0.0771036	-0.0906783	-0.0702281	-0.134776	-0.035491	-0.0367718	-0.0194308	-0.0445167	0.0231081	-0.0642884	-0.112158	-0.0762063	-0.0807275	-0.00941255	-0.0782533
133928	-0.00374639	-0.011239	-0.0972827	0.0200014	-0.0246978	0.0433824	-0.0652815	-0.028427	-0.0284091	-0.148751	-0.126539	-0.147478	-0.104758	-0.0395445	-0.212234	-0.0782561	-0.0926554	-0.0738571	-0.0474074	0.0287126	0.0674067	-0.0640555	-0.0750311	-0.0558359	-0.163279	-0.133965	-0.125207	-0.0553597	0.0139715	-0.0116	-0.0685224	-0.0576098	0.00827439	0.0534485	-0.0287294	-0.0573062	-0.165855	-0.240849	0.0109079	-0.216169	0.0233623	-0.029895	-0.159753	-0.208427	-0.211111	-0.138405	-0.0171425	-0.000368177	-0.106111
134021	-0.14963	-0.074324	-0.178257	-0.150089	-0.187267	-0.195597	-0.121626	-0.0321668	-0.040101	-0.261402	-0.0221635	-0.0365849	-0.0939711	-0.0665502	-0.0718223	-0.111493	-0.109239	-0.232097	-0.0605445	-0.123116	-0.148486	-0.151694	-0.148167	-0.104687	-0.188277	0.0304654	-0.114295	-0.247865	-0.100691	0.0341054	-0.0238582	-0.0443199	-0.00066058	-0.0474915	-0.00430742	-0.194904	-0.103129	-0.165745	-0.0911043	-0.0143327	0.0149057	-0.136693	-0.0742632	-0.148092	-0.161426	-0.235148	-0.150034	-0.135384	-0.154488
134223	-0.217278	0.0116459	-0.100065	-0.146381	-0.124417	-0.14961	-0.194875	0.0780828	0.106875	-0.0922165	-0.0457975	-0.226753	-0.108905	-0.177119	-0.281131	-0.0987146	-0.135468	-0.204687	-0.179744	-0.161012	-0.0586468	-0.0871039	0.0589157	-0.0375862	0.0481813	-0.183546	-0.190947	0.0274098	-0.148513	-0.126561	0.0155311	-0.164925	-0.0574818	-0.128351	-0.202881	0.0816503	0.0841111	-0.0397375	0.0955844	0.0178457	0.0510143	0.0162246	0.107658	-0.10337	-0.0668403	-0.208462	0.00742544	-0.0887335	0.0167984
134324	-0.0889019	0.0168909	-0.223745	-0.103995	-0.159647	-0.0637697	-0.0974693	0.0563857	0.0488852	-0.161898	-0.151191	-0.284646	-0.115774	-0.0837007	-0.197065	-0.123471	-0.154247	-0.0448616	-0.0330401	-0.00843486	-0.0210908	-0.0506773	-0.0978015	-0.0553731	-0.174108	-0.0253132	-0.140208	-0.141595	0.0493619	0.106076	0.00681983	-0.179561	0.0668791	0.0567241	0.0767789	-0.198492	-0.150233	-0.269369	-0.0760815	-0.175184	0.000745677	-0.0474121	-0.166879	-0.153318	-0.25624	-0.195775	-0.119425	-0.0563585	-0.151412
134425	-0.181864	-0.100784	-0.198704	-0.217171	-0.223723	-0.0973498	-0.098449	0.097251	0.063473	-0.379626	-0.033024	-0.116815	-0.245744	0.00651808	-0.0993945	-0.132982	-0.162819	-0.149005	-0.166656	-0.0843724	-0.150415	-0.13806	-0.0607553	-0.0335953	-0.32005	-0.0742146	-0.100498	-0.118685	0.102363	0.181725	0.0619724	-0.0931328	0.139563	0.0521719	-0.107441	-0.310898	-0.248432	-0.095292	-0.0189667	-0.0469064	0.0652518	0.012607	-0.140816	-0.228574	-0.292822	-0.271985	-0.0423097	0.0272893	-0.0842857
134627	-0.141009	-0.0588686	-0.195415	-0.195731	-0.149106	-0.035296	-0.0538015	-0.0763001	-0.108071	-0.138603	-0.134015	-0.200263	-0.104087	-0.028588	-0.0972986	-0.112127	-0.0362813	-0.112017	-0.0168552	-0.0690986	-0.0282756	-0.0386461	-0.0927729	-0.088784	-0.204585	-0.0749316	-0.0803662	-0.13471	-0.105897	-0.01842	-0.0917153	-0.00518974	0.032369	0.0618364	-0.0116497	-0.09618	-0.101365	-0.0529389	-0.10838	-0.0424068	-0.0113712	-0.18693	-0.144941	-0.135296	-0.166856	-0.0984681	-0.174142	-0.0901794	-0.110007
134728	0.0425762	-0.0271682	0.0564427	0.0580747	0.0355297	-0.0741339	0.0240396	0.0450022	0.0384413	-0.116853	-0.065342	-0.0927208	0.0594391	-0.0835045	-0.143686	0.0212997	-0.023012	-0.0317072	-0.00839636	-0.0237634	-0.0356774	-0.0277666	-0.00106365	-0.0852046	-0.137944	-0.118448	-0.0926793	-0.153568	-0.189311	-0.0738268	-0.0398954	-0.160768	-0.0521552	-0.0885042	-0.101742	-0.023039	-0.107649	-0.193532	-0.0130042	-0.0832864	-0.0727334	-0.027728	0.00276548	-0.141477	-0.0863317	-0.0806451	-0.0489517	-0.0249247	-0.0360132
134829	-0.0327812	-0.0762412	-0.00622801	0.0199773	0.00628124	0.00826405	-0.0780006	0.0287897	0.0192298	-0.0757677	-0.0908671	-0.0963129	-0.0421564	-0.0517389	-0.0921354	-0.102533	-0.0105511	-0.0840235	-0.0547932	0.0129578	0.00960543	0.0180528	-0.0859271	0.0538375	-0.0916706	-0.109514	-0.10247	-0.0732123	-0.136021	-0.0754766	-0.0489592	-0.0075515	-0.0118611	-0.0108042	-0.0557736	-0.0164521	-0.103904	-0.113084	-0.0493078	-0.0349003	-0.0101192	-0.0105209	0.00181155	-0.0880798	-0.112288	-0.0738396	-0.0300473	-0.0127006	-0.0186926
135124	-0.0324214	-0.129125	-0.171734	-0.176048	-0.150351	-0.0467939	-0.133561	-0.110917	-0.116438	-0.177019	-0.0953283	-0.0379471	-0.13798	-0.0138983	-0.0903111	-0.0888456	-0.0232693	-0.0804856	-0.0833657	-0.0587816	-0.120273	-0.0280089	-0.148219	-0.0449215	-0.230006	-0.0592322	-0.106851	-0.217575	0.00595903	0.000562199	-0.111965	0.0368216	0.00486608	0.0406705	-0.0413991	-0.129601	-0.140433	-0.0590742	-0.0673824	-0.0905458	-0.038053	-0.0851951	-0.0553927	-0.0825204	-0.0792695	-0.0872077	-0.172324	-0.0959487	-0.0486506
135225	-0.343783	0.0505491	0.0536613	-0.0804182	-0.0339381	-0.125588	0.0500952	0.201928	0.255431	-0.164917	-0.305233	-0.255451	-0.0415941	-0.358608	-0.240301	-0.0168508	-0.0659473	-0.0158287	0.101917	-0.136305	0.136026	-0.0192535	0.0880692	0.111267	-0.171225	-0.313171	-0.383038	0.0770748	-0.0673384	-0.0268922	-0.0642193	-0.399576	0.0982472	-0.0135483	-0.131457	-0.342178	-0.434922	-0.556483	0.0629377	-0.0565159	-0.0416174	0.00508738	-0.298982	-0.327589	-0.420735	-0.400633	0.0400459	-0.19093	0.0475915
135528	-0.0483274	-0.0701759	-0.101895	-0.120536	-0.154995	-0.0133995	-0.0576477	-0.0536874	-0.0457899	-0.122302	-0.170676	-0.161165	-0.0975954	-0.0636816	-0.0506866	-0.113531	-0.0934668	-0.0947669	-0.125466	-0.0964975	-0.0185576	-0.0120276	-0.0864422	0.0119234	-0.1442	-0.120902	-0.112346	-0.14087	0.0169817	0.0733391	-0.0495317	-0.00288384	0.0989476	0.082925	0.0122356	-0.11247	-0.0549106	-0.0163372	-0.112269	-0.0808516	-0.0153716	-0.121081	0.0145691	-0.0913587	-0.0489051	-0.142498	-0.161153	-0.12389	-0.0986451
135629	0.0351222	-0.0660147	-0.0561159	-0.0678737	-0.132564	-0.0580042	-0.0629774	0.0701906	0.0822247	-0.142942	-0.124558	-0.233405	-0.0298865	-0.135942	-0.176707	-0.122568	-0.125895	-0.0910816	-0.0200265	-0.0579052	-0.0598061	-0.136021	-0.00498341	0.0792016	-0.119496	-0.0775736	-0.235411	-0.132483	-0.205761	-0.159529	-0.0247018	-0.146256	-0.0603461	-0.0849203	-0.151448	0.0497285	0.0558853	-0.0525556	0.0796966	0.0501485	0.0372162	0.00984483	-0.0067929	-0.19865	-0.122643	-0.135924	-0.0688822	0.0108499	-0.00368964
135730	-0.100233	-0.0249052	-0.134531	-0.119906	-0.118694	-0.0257364	-0.0869337	0.029367	-0.0438845	-0.18933	-0.121981	-0.252187	-0.0730145	-0.0896762	-0.18324	-0.0619907	-0.0446228	-0.0279965	-0.0879625	0.0169628	0.0129673	0.0156855	-0.0963466	0.0240212	-0.225144	-0.0517914	-0.0973268	-0.231979	-0.0633057	0.00374123	-0.131566	-0.0909582	-0.0233884	0.129392	-0.00494932	-0.139982	-0.207634	-0.285794	-0.0708999	-0.0601564	0.0363436	-0.0807123	-0.0449633	-0.107952	-0.231732	-0.155307	-0.0216847	-0.106595	-0.07587
135932	-0.12251	-0.096878	-0.145078	-0.198765	-0.163202	-0.12818	-0.0222176	0.0134514	-0.00180989	-0.0120292	0.0092636	0.0450938	-0.138701	-0.0354948	-0.0965353	-0.106164	-0.0503356	-0.0590563	-0.121274	-0.108044	-0.101923	-0.0904943	-0.0903496	0.0539654	-0.0506476	0.00623668	-0.0591771	-0.0640458	-0.0124967	-0.00341501	-0.0743979	-0.0289663	-0.019403	0.0231173	-0.0134288	-0.0202695	-0.0272715	-0.0303672	-0.0482872	-0.0627175	0.0124602	0.0204578	0.0460354	-0.0546325	-0.0726886	-0.103783	-0.0756703	-0.0563698	-0.018848
136126	0.0832386	0.0409221	-0.121286	0.0530768	0.117992	0.104876	0.0590325	0.0341243	0.0766978	-0.139085	-0.138014	-0.235774	0.0439383	-0.204741	-0.179905	0.0598592	0.010447	-0.0384448	0.0229976	0.0603486	0.0173087	0.0133054	-0.00517725	-0.0512984	-0.118428	-0.14499	-0.147562	-0.0382046	-0.218957	-0.195025	-0.182857	-0.107386	-0.140689	-0.132699	-0.232589	-0.0749022	0.0616537	-0.073541	0.00521175	-0.0333124	0.0534225	0.0206896	-0.0629336	-0.268937	-0.0210343	-0.0881684	-0.0031506	0.0192805	-0.1056
136227	0.0555094	-0.0860083	-0.169098	-0.0361159	-0.0814849	-0.0711115	-0.1255	-0.170872	-0.137449	-0.0540054	-0.0884322	-0.143834	-0.0543515	-0.0306288	-0.0125535	-0.0849632	-0.0580957	-0.0988011	-0.0542866	-0.121888	-0.135193	-0.093974	-0.0736005	0.0104915	-0.0634538	-0.039248	-0.104335	-0.0951633	0.0121236	-0.0339294	-0.0517112	0.0201203	-0.0743533	-0.0173878	0.000358169	-0.142174	-0.0353089	0.0477963	-0.0094699	-0.0482699	0.0153641	-0.0696984	0.00893387	0.0521861	0.0636016	0.040035	-0.0530143	-0.0851907	-0.0620923
136631	-0.143901	0.0158423	-0.126174	-0.106676	-0.123996	-0.0692643	-0.0979455	-0.0432733	-0.0268825	-0.290208	-0.10477	-0.251163	-0.124571	-0.0367782	-0.0625243	-0.14454	-0.13605	0.00120983	-0.0726158	-0.130715	-0.0382797	-0.115803	0.0192645	-0.0433715	-0.0428149	-0.12671	-0.0582656	-0.137613	-0.0289386	0.0116714	-0.0257683	-0.0531576	0.022913	-0.0219115	-0.0144249	-0.0438682	-0.069335	-0.0824083	0.00816177	-0.051672	-0.00643286	-0.0844227	-0.00466723	-0.143737	-0.0712452	-0.0249719	-0.0397217	-0.101008	-0.153501
136732	-0.106818	-0.137453	-0.452983	-0.173512	-0.275496	-0.206485	-0.0707363	0.0258359	-0.0371958	-0.345923	-0.338613	-0.0719905	-0.148663	-0.167419	-0.228077	-0.226613	-0.417768	-0.211533	-0.180639	-0.165852	-0.152203	-0.224916	-0.029824	-0.112057	-0.507592	-0.500756	-0.158694	-0.445302	-0.185276	0.0574786	-0.0207747	-0.341902	0.12924	-0.305175	-0.377121	-0.276686	-0.201132	-0.298837	-0.0734198	-0.120604	-0.159642	-0.222616	-0.241277	-0.391647	-0.409236	-0.474997	-0.387376	-0.0702697	-0.362172
136833	-0.084931	-0.0201836	-0.1808	-0.141822	-0.154792	-0.165251	-0.12405	0.0439841	0.0703549	-0.158361	-0.0730708	-0.0331225	-0.0706315	-0.0916089	-0.201237	-0.0353833	-0.102022	-0.135402	-0.110256	-0.0417588	-0.11757	-0.136585	-0.024591	-0.0104024	-0.0230913	-0.204113	-0.0205208	-0.0283966	-0.102569	0.0536006	0.142686	-0.121569	0.0530995	-0.0278207	0.00589085	0.013925	-0.0793939	-0.133966	0.0219066	-0.0160829	0.0334874	-0.0870085	-0.0458623	-0.0743944	-0.241789	-0.199323	-0.148056	-0.264497	-0.0808738
137027	-0.0934281	0.0223892	-0.0655769	-0.100623	-0.03746	-0.00717234	-0.0442502	0.0257691	-0.0101219	-0.0944941	-0.0576703	-0.0397091	0.00327517	-0.133916	-0.209295	-0.0401879	-0.174607	-0.0106607	-0.011896	0.0306865	0.045513	-0.0112924	0.0597551	-0.0213731	-0.0141765	-0.0781083	-0.175982	-0.0180377	-0.197427	-0.06814	-0.158589	-0.157032	-0.0031432	-0.02262	-0.0174298	-0.0971536	-0.165169	-0.175126	-0.0338633	-0.111129	-0.00966136	-0.0428449	-0.0682256	-0.172032	-0.192267	-0.126849	-0.0263801	-0.0262076	-0.042758
137128	-0.196599	-0.158008	-0.1478	-0.259786	-0.322327	-0.215769	-0.279105	0.0116477	0.0136208	-0.14052	-0.175074	-0.0678179	-0.227103	-0.0494097	-0.139787	-0.206422	-0.174399	-0.255058	-0.134607	-0.240429	-0.194819	-0.284014	-0.121512	0.0562962	-0.111118	-0.174435	-0.0932275	-0.0259304	0.116149	0.134988	-0.0121721	-0.0511166	0.086512	0.0459168	0.0662649	-0.0808914	-0.123979	-0.175823	0.0228373	-0.10946	-0.0290791	-0.169924	-0.0929124	-0.194412	-0.26485	-0.122366	-0.0500831	-0.107997	-0.183637
137229	-0.119863	-0.0366579	-0.208819	-0.175172	-0.217411	0.00443029	-0.0831416	-0.0140301	0.0681106	-0.517979	-0.393955	-0.471328	-0.135563	0.0125589	-0.356308	-0.138872	-0.0963959	-0.0608324	-0.0782016	-0.0168435	0.0691487	0.0206091	-0.0774625	0.142188	-0.499668	-0.0867642	-0.450987	-0.502133	-0.214777	-0.0284614	-0.119919	-0.172183	0.0592262	0.142311	-0.14171	-0.21713	-0.191841	-0.298444	-0.103425	-0.111553	-0.16727	0.000429682	-0.282432	-0.4786	-0.194159	-0.204975	-0.198537	-0.00482273	-0.0196041
137431	-0.192303	0.0841941	-0.263508	-0.129456	-0.0843436	0.088491	0.177067	0.0320227	0.104715	-0.333729	-0.111934	-0.369043	-0.103078	-0.254377	-0.308712	-0.038198	-0.0925024	-0.100314	0.0198715	0.105399	0.0418637	0.0594342	0.138589	0.106895	-0.161079	-0.279968	-0.306837	0.0944126	-0.0424028	-0.0296444	-0.136274	-0.303534	-0.0380516	-0.0841613	-0.218366	-0.158384	-0.279912	-0.349969	-0.220396	-0.126503	0.0566555	-0.306818	-0.210784	-0.336998	-0.386813	-0.347866	-0.463949	-0.429658	-0.239467
137532	-0.0675868	0.0223447	-0.0780808	-0.0776512	-0.0743762	-0.0566209	-0.0555209	0.0839315	0.0467583	-0.0194571	-0.0843199	-0.112041	0.0246525	-0.121427	-0.093687	-0.0470157	-0.00722742	-0.00575317	-0.067123	-0.0731593	-0.00803987	-0.0226347	0.0120558	0.00545913	-0.0324582	0.00241163	-0.106978	-0.00136789	-0.0954532	-0.0471321	-0.0901423	-0.0412273	-0.0603486	-0.0394208	-0.0483213	-0.0340578	-0.0809518	-0.133066	-0.00838364	0.0408835	0.0508592	-0.0263247	0.0718643	-0.0194089	-0.0923149	-0.09225	-0.0423658	-0.05479	-0.0371472
137633	-0.12887	-0.0152366	-0.0252967	-0.133661	-0.0850316	-0.0811169	-0.0737647	0.0754288	0.0501669	-0.12449	-0.170528	-0.128942	-0.0495154	0.0527294	0.00776998	-0.20514	-0.246138	-0.114682	-0.00200959	-0.0926543	-0.0894384	-0.0812694	0.00734799	-0.0176803	-0.134252	-0.111501	-0.0104434	-0.091637	0.140252	0.190574	0.0559202	-0.00872676	0.219935	0.126828	0.134368	-0.0613664	-0.126251	-0.181027	-0.0265835	-0.0652819	-0.0712625	-0.0949284	-0.190611	-0.231501	-0.169176	-0.149197	-0.184071	-0.252545	-0.0277385
137936	-0.0116583	-0.138518	0.0366861	-0.0953859	-0.154555	-0.100041	-0.148613	-0.0439601	-0.0602739	-0.237322	-0.119309	-0.183345	-0.058181	0.0116678	-0.0270888	-0.131097	-0.0789858	-0.125739	-0.120793	-0.0519286	-0.117784	-0.12108	-0.145945	0.0565233	-0.152339	-0.124983	-0.120369	-0.16435	-0.135915	-0.0565636	0.0110775	-0.0534435	-0.0130665	-0.0468154	-0.0788566	0.0311618	0.0373541	-0.0175194	0.0377974	0.0331088	0.0804775	-0.0416654	0.0473568	-0.0614094	-0.0782044	-0.107356	-0.0835129	-0.0654574	-0.126808
138130	0.00363526	-0.0510275	-0.112774	-0.0813945	-0.0795386	-0.0162893	-0.0379647	0.15825	0.141445	-0.419601	-0.107276	-0.126804	0.0226135	-0.163883	-0.364631	-0.00959739	-0.0777836	-0.0736404	-0.0553567	-0.0418208	-0.0402525	-0.0264537	0.00433505	-0.00797112	-0.2798	-0.00993465	-0.261164	-0.242759	-0.174601	-0.0111572	-0.185787	-0.10783	0.0214732	-0.187786	-0.124307	0.0476808	-0.0540302	-0.117331	0.00699979	-0.00939027	0.0181869	-0.0667633	0.021007	-0.204515	-0.248594	-0.322624	-0.203872	-0.0883883	-0.04065
138231	0.0619444	-0.0299689	-0.0570293	-0.0366951	-0.0474993	-0.117635	-0.0867355	0.0124011	0.034753	-0.128608	-0.110736	-0.14317	0.0794372	-0.0361848	-0.15643	-0.106896	-0.0541246	-0.0895894	-0.063085	-0.133077	-0.148995	-0.15996	-0.148553	-0.0615893	-0.21066	-0.152344	-0.126326	-0.151706	-0.0909317	-0.0735498	0.038912	-0.0986931	-0.00690381	-0.100349	-0.143899	-0.0879203	-0.132072	-0.134015	-0.00182412	-0.118462	-0.04535	-0.112865	-0.118409	-0.144346	0.00183728	-0.00833694	-0.201715	-0.117027	-0.0494477
138332	-0.104136	-0.106111	-0.136902	-0.187278	-0.189945	-0.133644	-0.137622	-0.0300365	-0.00720829	-0.181324	-0.183483	-0.0856517	-0.0455429	-0.0376738	-0.151121	-0.128447	-0.204283	-0.116357	-0.0894633	-0.102733	-0.0529241	-0.161396	-0.0294374	0.00556014	-0.201821	-0.0575492	-0.155663	0.0474559	-0.144841	0.0930821	-0.061104	-0.0108794	0.0866176	0.127251	0.0409793	-0.111791	-0.200151	-0.256736	-0.0680129	-0.0111964	-0.00840308	-0.133321	-0.102015	-0.171545	-0.214141	-0.222047	-0.12009	-0.23686	-0.112913
138534	-0.0647105	-0.0608875	-0.114708	-0.132675	-0.101425	-0.0654645	-0.0522521	-0.0248754	-0.00704683	-0.0887585	-0.0772491	-0.0811304	-0.100954	-0.0245404	-0.0852205	-0.0539457	-0.0332495	-0.0220393	-0.0713003	-0.0146962	-0.0426213	-0.0802954	-0.0579673	0.0452797	-0.116876	-0.0477113	-0.0724138	-0.0774533	-0.0148051	-0.0256667	-0.0371068	-0.0684477	-0.0205819	0.0196155	-0.033187	0.0428943	-0.0259342	0.0131957	0.00391308	-0.0449435	-0.0194973	-0.0615503	-0.0660569	-0.0403023	0.00869505	-0.0216792	-0.0367872	-0.0807485	-0.0504038
138837	-0.0358169	-0.0144722	-0.117066	-0.0428361	-0.0772622	-0.101791	-0.0723377	0.0410467	0.0537674	-0.0850292	-0.0422628	-0.0489227	-0.0422659	-0.0626954	-0.119885	-0.0336735	-0.0592886	-0.0321409	-0.0617388	-0.0807173	-0.0458542	-0.0393365	-0.0415278	-0.0537169	-0.0187196	-0.0474121	-0.117403	-0.0592767	-0.033994	-0.0524682	-0.063082	-0.0664146	-0.0308283	0.00741542	-0.0452562	-0.0230277	-0.0528149	-0.118653	0.00740818	0.0462461	0.0428752	-0.0529185	0.000706393	-0.0701704	-0.0853771	-0.0799519	-0.11066	-0.0838077	-0.0529551
139233	0.0227563	-0.061009	-0.162665	-0.131226	-0.150016	-0.114225	-0.146589	0.044646	0.0555384	-0.0741804	-0.267524	-0.361563	-0.103762	-0.0814439	-0.0755931	-0.181714	-0.162109	-0.193206	-0.157691	-0.203837	-0.18604	-0.174437	-0.222437	0.0619169	-0.340274	-0.0881812	-0.263202	-0.145761	-0.0586213	-0.00664645	-0.0299818	-0.175509	-0.0254509	0.0278303	-0.100777	-0.178781	-0.186416	-0.262105	0.00557076	-0.186651	-0.0321216	-0.221981	-0.0945453	-0.160912	-0.24902	-0.155222	-0.254926	-0.16041	-0.288546
139435	0.0242071	0.00901468	-0.221319	-0.0954702	-0.103347	-0.0659639	-0.0691516	0.0800791	0.110306	-0.162439	-0.286226	-0.42135	-0.069037	-0.0989162	-0.29281	-0.168438	-0.0756082	-0.362336	-0.100908	-0.132526	-0.0658716	-0.23499	-0.00820602	0.071066	-0.257212	-0.157518	-0.386538	-0.153993	-0.30487	-0.0332751	-0.0585307	-0.126173	-0.136354	-0.092775	-0.0413909	-0.104398	-0.094176	-0.26267	-0.190128	0.017991	0.0791363	-0.147463	0.0594031	-0.459785	-0.381265	-0.389741	-0.372742	-0.0639477	-0.244274
139637	0.12291	0.0456675	-0.0722596	0.0422013	-0.0236107	-0.00898174	-0.0647975	0.0366648	0.13483	-0.217467	-0.119046	-0.231666	-0.02944	-0.11738	-0.271006	-0.000252999	-0.0644239	-0.0908252	0.0443028	-0.0231127	-0.0700958	0.0164284	0.0570959	-0.0259795	-0.0608707	-0.146013	-0.115656	-0.00379521	-0.164544	-0.00827793	0.111203	-0.162231	-0.0357399	-0.0214958	0.0329935	-0.183072	-0.179329	-0.242554	-0.102315	-0.121182	0.0444414	-0.0932515	-0.182345	-0.23382	-0.198974	-0.00903973	-0.129124	-0.0811157	-0.00313806
139839	0.0832665	-0.0173542	0.0545747	0.0640398	0.112487	0.138077	0.21123	-0.0172341	0.0272489	0.117084	-0.252756	-0.318247	0.105363	-0.249131	-0.00589534	0.131928	0.101836	0.11744	-0.0040755	0.0976621	0.138769	0.106237	-0.0368832	-0.0213705	-0.336686	-0.168675	-0.440824	-0.0594734	-0.442169	-0.365764	-0.262295	0.109355	-0.317672	-0.268599	-0.344799	0.141932	0.211756	0.100317	-0.0465761	0.0990595	0.0154067	0.0661089	0.179916	-0.393742	0.0911637	0.00831031	0.0666767	0.1556	-0.0208954
140117	-0.100931	-0.02063	-0.153196	-0.108194	-0.0694643	-0.099501	-0.0685922	0.0976434	0.101585	-0.160967	-0.156071	-0.29279	-0.079297	0.00188357	-0.186932	-0.171794	-0.250065	-0.00977909	-0.08761	-0.0489806	0.0190254	-0.0720818	0.080254	-0.0393394	-0.0451981	0.00879625	-0.24315	-0.0728268	-0.208702	0.0205543	-0.0304796	0.0318671	0.0954596	-0.0164029	-0.103775	-0.0474525	-0.0456448	-0.0963972	-0.0284249	0.0212345	0.0633178	0.00668389	-0.0577114	-0.276815	-0.173025	-0.233795	0.0160547	-0.02032	0.0148205
140319	0.117405	0.0489764	-0.019978	0.113995	0.101862	-0.0100764	-0.0440804	0.0375206	0.0632085	-0.151742	-0.173302	-0.278004	0.101467	-0.115134	-0.258834	0.0988913	0.0577381	-0.0781004	0.0527691	0.0215233	-0.0473967	-0.0196195	0.0423863	-0.0210602	-0.267979	-0.131032	-0.206269	-0.133328	-0.141306	-0.123554	-0.0379872	-0.252778	-0.0505783	-0.151149	-0.0890634	-0.034763	-0.024901	-0.19948	0.0359086	0.00246764	0.0445211	0.0702946	0.0431278	-0.106986	-0.0346135	-0.15359	-0.0547904	-0.12931	0.0356503
140824	-0.105069	0.0462497	-0.059018	-0.0803452	-0.0725135	-0.0206619	-0.0163434	0.0332368	-0.0129788	-0.103013	0.0545826	-0.0343665	-0.0525118	-0.0335634	-0.0902808	-0.0135579	0.000438588	-0.0435883	-0.00677922	-0.00593077	0.0272186	-0.0287852	0.0135157	-0.0727871	-0.138898	0.0516468	-0.126255	-0.0368509	-0.0239863	0.0234416	-0.0346087	-0.0594176	0.0138157	0.0108211	-0.0582092	-0.000524367	-0.0658442	-0.107004	0.00789226	-0.0688247	-0.0156923	-0.0117364	-0.0479172	-0.0494999	-0.0960378	-0.110972	-0.0649951	-0.0145068	-0.0258046
140925	-0.113723	-0.0439945	-0.182005	-0.0646015	-0.00914898	0.0417039	0.0394542	-0.134483	-0.154311	-0.148856	0.0105968	0.0131794	-0.0940675	-0.147742	-0.226	-0.0792528	-0.0134078	0.0382403	0.00554724	-0.0102098	0.0837176	0.0418822	-0.0763002	-0.0355631	-0.0137169	0.00150176	-0.220175	-0.15293	-0.0862427	-0.088056	-0.164318	-0.066529	-0.0810324	-0.0278257	-0.0648653	-0.141894	-0.203473	-0.203453	-0.100979	-0.17777	-0.104703	-0.0615536	-0.173579	-0.147745	-0.149647	-0.0518244	-0.0648015	0.0583999	-0.0849839
141119	-0.0299781	-0.00523071	-0.0998612	-0.0425563	-0.0126376	0.0153571	0.000210019	0.0108815	0.0240875	-0.0568725	-0.0609535	-0.0403863	-0.0585166	-0.0247742	-0.0763285	-0.0521267	-0.00885383	-0.00653871	-0.030694	-0.00858353	-0.017545	0.0357406	0.00880484	0.005847	-0.0833718	-0.0578871	-0.109906	-0.00568439	-0.0158841	0.0029763	-0.0468565	-0.0332335	0.0466145	-0.00113687	-0.0355393	-0.0872398	-0.118528	-0.102089	-0.0631953	0.00150208	0.00530706	-0.0186432	-0.0400149	-0.0805882	-0.0746902	-0.00603225	0.0176676	-0.0244389	-0.00507264
141422	-0.100759	-0.102787	-0.0954975	-0.0905816	-0.109698	-0.0928806	0.019576	-0.0326293	-0.0389572	-0.109857	-0.0162014	-0.166044	-0.107124	-0.020779	-0.175083	-0.0471247	-0.0749267	-0.195216	-0.00428796	-0.105441	-0.0589306	-0.130326	-0.111021	-0.0899607	-0.225648	0.106996	-0.344896	-0.243882	-0.189954	-0.0362754	0.0114475	-0.155628	0.0518061	-0.0879715	-0.151486	-0.0985496	-0.0656697	-0.202393	-0.0347494	-0.0755832	0.0182928	-0.258106	0.0260387	-0.123128	-0.17719	-0.0362611	-0.242154	-0.355029	-0.212803
141826	-0.10879	0.0164787	-0.184907	-0.106759	-0.132575	-0.108988	-0.076955	-0.00950703	0.0364243	-0.271135	-0.198304	-0.288241	-0.165463	-0.0108164	-0.101973	-0.199793	-0.132486	-0.100105	-0.125919	-0.100614	-0.0826154	-0.162998	0.0263131	-0.0462572	-0.189933	-0.0666435	-0.103087	-0.254928	-0.0103279	0.0489004	0.0111263	-0.00967567	0.03747	0.0623218	0.00840448	-0.117821	-0.21089	-0.278319	-0.172414	-0.120513	-0.0103502	-0.0526326	-0.113968	-0.200543	-0.318332	-0.227796	-0.235163	-0.0511132	-0.153408
142828	-0.125226	-0.133555	-0.189679	-0.127464	-0.147975	-0.0569784	-0.0636784	-0.0971546	-0.0267378	-0.188063	-0.171332	-0.31596	-0.178233	0.0137871	-0.075847	-0.135329	-0.0186122	-0.063141	-0.086674	-0.00818803	-0.00993895	-0.0414249	-0.100697	0.00991633	-0.21636	-0.181031	-0.160591	-0.293879	-0.119267	-0.060661	0.0495677	-0.111229	0.0142963	0.0527603	-0.0212912	-0.109791	-0.0841418	-0.189844	0.0203306	-0.134607	-0.0385559	-0.0319017	-0.217863	-0.15079	-0.0990518	-0.0171876	0.0507779	-0.0525787	-0.0421215
143224	-0.166014	0.0229818	-0.0731954	-0.110834	-0.0461315	0.00780779	-0.0504154	0.0755038	0.0922311	-0.162018	-0.103358	-0.0556224	-0.0936275	-0.0657518	-0.167351	-0.0390971	-0.02763	0.011446	-0.0588072	0.014935	0.0290772	0.00231205	0.0704355	0.0314407	-0.16796	-0.109852	-0.00636884	0.00611167	-0.141991	0.0652089	-0.00648691	-0.0573842	0.0384257	0.0418564	0.0518382	-0.0544137	-0.128557	-0.148324	-0.0891072	-0.022147	-0.0174687	-0.0597503	-0.0419166	-0.0645004	-0.23203	-0.149566	-0.0627805	-0.0186154	-0.0948195
143325	-0.19145	-0.0481082	-0.208231	-0.219769	-0.243934	-0.14975	-0.117055	-0.0168542	0.060056	-0.24657	0.0109394	-0.161536	-0.208014	-0.0928613	-0.114873	-0.177593	-0.100195	-0.0919542	-0.190745	-0.108287	-0.168316	-0.167695	-0.143495	0.0106861	-0.236995	-0.0029228	-0.0696532	-0.26737	-0.134968	0.0401069	0.0351728	-0.103816	0.0247651	0.00624747	0.00033207	-0.0262469	-0.203233	-0.207527	-0.0792195	-0.0912835	0.0366645	-0.203132	-0.150789	-0.209135	-0.218331	-0.16266	-0.182195	-0.195228	-0.255156
143426	-0.122044	0.00756633	-0.129251	-0.180127	-0.178329	-0.117555	-0.154071	0.123822	0.118542	-0.162561	-0.146707	-0.143456	-0.0900055	-0.000288428	-0.174467	-0.124442	-0.112018	-0.128884	-0.0817003	-0.0780265	-0.0933326	-0.0718082	0.0257115	0.0554788	-0.278707	-0.0464541	-0.239172	-0.246471	-0.0415477	0.0981968	0.141887	-0.226612	0.123067	0.0829196	0.0580158	-0.184647	-0.18356	-0.235481	-0.0416787	-0.0885489	0.0094711	-0.184525	-0.0825139	-0.15144	-0.262406	-0.263456	-0.130365	-0.120838	-0.121119
143830	-0.0432142	0.0673366	-0.0759232	-0.0917421	-0.105698	-0.0824619	0.0176256	0.0331419	0.0162911	-0.113564	-0.133112	-0.148209	-0.0642496	0.00497799	-0.0788928	-0.0308764	-0.0327722	-0.0516416	-0.0299889	-0.0117096	-0.0565074	-0.0945631	0.0540413	-0.000172649	-0.105876	-0.156684	-0.105484	-0.102364	0.00480927	0.0318034	-0.0138524	-0.0317882	0.0122434	0.0319768	0.00182768	-0.0471569	-0.0887401	-0.12942	0.017942	-0.0145641	-0.0230648	-0.0293853	-0.0713098	-0.12545	-0.104752	-0.0328003	-0.0457725	-0.0869054	7.39694e-06
144125	-0.0155972	-0.0102831	-0.00893309	-0.0277457	0.0083949	0.054526	0.0044461	0.048228	0.0209223	-0.0272818	-0.0302075	-0.0482849	0.0458463	-0.0571232	-0.0727235	0.0103527	-0.0210275	-0.0192563	0.0406013	0.0338234	0.00993292	-0.00463321	0.0214666	-0.0741415	-0.0507499	-0.00427613	-0.0526922	-0.0739096	-0.0502107	-0.0212434	-0.0460917	-0.0143569	-0.029452	-0.030293	-0.0259888	0.0249256	-0.0172981	-0.0249782	0.032339	0.031357	0.0250471	0.0239042	-0.0258904	-0.0699213	-0.0283657	-0.0214703	-0.00241255	0.0252964	-0.0556837
144226	-0.166486	-0.0508469	-0.0899143	-0.115927	-0.218292	-0.207969	-0.196631	0.0324461	0.0107954	-0.34452	-0.282803	-0.366901	-0.150531	0.126983	-0.07105	-0.164766	-0.225245	-0.151769	-0.179321	-0.167626	-0.079484	-0.155342	-0.082378	-0.0953026	-0.135404	-0.113224	-0.194797	-0.354807	-0.240379	0.159647	0.132776	-0.04437	0.104933	0.120238	0.0386175	-0.17495	-0.174825	-0.144162	-0.0493364	-0.14132	-0.171874	-0.14985	-0.271662	-0.362941	-0.277213	-0.257304	-0.302406	-0.19525	-0.287512
144428	-0.123845	-0.0095883	-0.237454	-0.10795	-0.165908	-0.0420388	-0.0715114	0.0902999	0.0575678	-0.129602	-0.204542	-0.189823	-0.118235	-0.0878092	-0.191852	-0.113652	-0.00245195	-0.0761483	-0.102725	-0.0554809	-0.0861796	-0.115503	-0.0588448	0.00492079	0.0214961	-0.222463	-0.0988833	0.0191494	-0.252699	-0.0439457	-0.00165276	-0.111549	-0.0230542	-0.078059	-0.0598445	-0.121581	-0.198528	-0.276407	-0.100908	-0.00653223	0.0297495	-0.0291047	-0.115665	-0.124578	-0.184311	-0.115139	-0.0902831	-0.0660688	-0.155756
144731	-0.273388	-0.0246229	-0.149488	-0.256091	-0.197654	-0.13159	-0.139817	0.126201	0.147048	-0.132684	-0.204081	-0.281816	-0.150873	-0.18033	-0.129615	-0.153048	-0.0648203	-0.120997	-0.133796	-0.181967	-0.12733	-0.135963	-0.0601899	-0.0222442	-0.140901	-0.166106	-0.32606	-0.0643884	-0.201769	0.00999216	-0.0334991	-0.152338	0.11438	-0.0125286	0.0333921	-0.139346	-0.315193	-0.319296	-0.110956	-0.16583	-0.0276796	-0.141575	-0.124395	-0.266664	-0.267214	-0.19296	-0.0439144	-0.005016	-0.158197
144832	-0.128798	-0.0189067	-0.197545	-0.044557	-0.00137616	-0.106363	0.0331322	0.145479	0.110235	-0.313405	-0.233206	-0.446166	-0.0664389	-0.0829454	-0.258441	-0.0428307	-0.150969	-0.0292491	-0.169981	-0.0193605	-0.129734	-0.0625206	0.0953954	0.0508613	-0.306991	-0.229584	-0.23882	-0.0696878	-0.0881427	0.0146106	0.0112	-0.18519	0.0335647	-0.0685363	-0.136021	-0.018349	-0.157016	-0.210314	0.0638101	-0.0196918	0.0469633	0.0640223	-0.22327	-0.138985	-0.213995	-0.230753	-0.0455802	-0.0857367	-0.160117
144933	-0.0899056	0.00481091	-0.122837	-0.158599	-0.140901	-0.11816	-0.106508	-0.0392121	-0.0396545	-0.193612	-0.0626944	-0.0788029	-0.108901	-0.00626651	-0.1153	-0.0402837	-0.081956	-0.0854545	-0.0427853	-0.0790323	-0.034826	-0.0215376	-0.0922276	0.019032	-0.237681	-0.00607142	-0.154745	-0.169077	-0.151428	-0.0859297	0.000353769	-0.0552469	0.0300392	0.0165632	-0.0665922	-0.0852418	-0.100741	-0.0768027	-0.0953672	-0.0512579	0.0320822	-0.0564968	-0.05891	-0.131025	-0.0895976	-0.115461	-0.0324334	-0.0253423	-0.0571157
145127	-0.0104894	-0.120103	-0.0669543	-0.0679267	-0.197281	-0.195709	-0.200743	0.0704606	0.126302	-0.254003	-0.347168	-0.339602	-0.108039	0.0807651	-0.116023	-0.243474	-0.380517	-0.139648	-0.225828	-0.270722	-0.159951	-0.20819	-0.201531	-0.0355758	-0.279338	-0.165142	-0.0469601	-0.205206	-0.0794654	-0.00747471	0.0180949	-0.0270558	0.0657191	0.038891	-0.0728965	-0.0936101	-0.232558	-0.214703	-0.0785572	-0.00338136	0.017719	-0.223584	-0.0993082	-0.269689	-0.197973	-0.229097	-0.366286	-0.298435	-0.306006
145632	0.0368642	0.039553	-0.22274	0.0537352	-0.082475	0.0064955	0.0247046	0.117608	0.10476	-0.102165	-0.211483	-0.404347	-0.0846006	-0.0248089	-0.355881	0.00393207	-0.00891381	0.0432678	0.021303	0.0334806	0.00627074	0.0196821	0.0789043	-0.0545241	-0.250607	-0.191277	-0.204299	-0.0777571	-0.230688	-0.295885	-0.0820032	-0.124541	0.0625191	-0.00263649	-0.276227	-0.0101262	-0.200548	-0.285505	-0.0161905	-0.120175	-0.0290477	-0.0734	-0.270626	-0.441592	-0.302391	-0.284417	-0.24448	-0.0648858	-0.27214
145834	-0.0336995	0.0250749	-0.107826	-0.0438883	-0.0442535	-0.00141489	0.0173877	-0.0127086	0.0434513	-0.18893	-0.17559	-0.122208	-0.0672279	-0.0745344	-0.195397	-0.123248	-0.101284	-0.0396008	-0.0287909	-0.0329178	-0.0309852	-0.0856405	-0.00676254	-0.0754044	-0.226512	-0.00762901	-0.182964	-0.0237716	-0.11453	0.0330619	-0.0344378	-0.164432	0.0680685	0.0466154	-0.0887434	-0.309581	-0.214089	-0.26319	-0.171009	-0.147299	-0.0126282	-0.148665	-0.0805134	-0.254141	-0.222217	-0.28513	-0.0275896	-0.0215418	-0.180944
146129	-0.0992605	0.0979674	-0.0404314	-0.0855539	-0.0616647	-0.0161832	-0.0511007	0.104501	0.101421	-0.131588	-0.142663	-0.182222	-0.0378294	-0.0939099	-0.191235	-0.0988135	-0.00834898	0.0415307	-0.00874045	0.0248958	0.0151674	0.0381597	0.0715026	0.0216085	-0.245009	-0.14549	-0.0742089	-0.154203	-0.0598622	0.0331916	-0.0692014	-0.211578	0.052316	0.0124446	-0.0694606	0.00186737	-0.0265146	-0.0579291	0.0161273	0.00856095	0.0407375	-0.00762453	-0.136682	-0.0826684	0.000967074	-0.0214138	0.0303094	-0.0203154	0.0784685
146331	-0.0187939	-0.0377157	-0.0776094	-0.0269131	-0.039998	0.0901377	-0.0206183	0.0360158	0.0424063	-0.0802595	-0.0675767	0.0105074	-0.0747226	-0.0927957	-0.104339	-0.0459578	-0.134724	-0.0206216	-0.0418601	-0.113575	-0.0308009	0.014432	-0.0422986	-0.0366554	-0.0880466	-0.0180079	-0.0948762	-0.0710556	-0.0870424	-0.0359292	-0.0822618	-0.0142755	-0.0299177	-0.0283963	-0.0716493	-0.0819925	-0.0832801	-0.154693	0.00295352	-0.055773	-0.0231577	-0.0433186	-0.0134865	-0.224422	-0.156477	-0.274285	-0.0271259	-0.0318093	-0.0831744
146432	-0.0618012	-0.0412725	-0.0737816	-0.0660242	-0.070895	-0.0107148	0.0117017	0.0561475	0.0912518	-0.0919523	0.0431581	-0.0951912	-0.0502231	-0.102958	-0.153246	-0.0354542	-0.012313	-0.0234575	-0.0324561	-0.0250558	-0.0143172	-0.0109217	-0.0454669	0.0154719	-0.0954545	-0.0341268	-0.101443	-0.0602345	-0.0925596	0.0407727	-0.0124958	-0.107998	0.041081	0.00353447	-0.0361714	-0.00157133	-0.0880718	-0.0921815	-0.0374012	0.0385807	0.050352	-0.0193963	-0.029506	-0.084381	-0.0863677	-0.0745641	0.0383032	-0.0513537	-0.00471576
146533	-0.122473	0.0900355	-0.0511147	-0.0610379	-0.062191	-0.105224	-0.0297607	-0.00119827	-0.0179556	-0.155607	-0.215336	-0.307295	-0.0342245	-0.106458	-0.0805458	-0.0667702	-0.0170982	-0.0804294	-0.115831	-0.116841	-0.0795004	-0.0892417	0.0608582	-0.0471952	-0.305	-0.312689	-0.162191	-0.323823	0.0268123	0.113976	0.0909957	-0.245162	0.0707876	-0.049968	0.00621587	-0.149873	-0.158266	-0.233914	-0.000691436	-0.0418689	0.0400802	-0.0194365	-0.161891	-0.266736	-0.150758	-0.301009	-0.0351936	-0.0431831	-0.134729
146735	-0.126422	-0.0726246	-0.15547	-0.12958	-0.108064	-0.095109	-0.0961665	-0.100464	-0.106637	-0.278442	-0.082823	-0.200618	-0.170686	-0.0197917	-0.255925	-0.143003	-0.151745	-0.0706609	-0.0513458	-0.0864229	-0.0759262	-0.00897537	-0.0733841	-0.0272072	-0.198921	0.0313609	-0.137094	0.0813028	-0.232252	-0.0886045	-0.0473969	-0.100514	0.0663359	-0.048561	-0.124322	-0.069235	-0.138208	-0.191689	-0.078751	-0.0711253	-0.0231483	-0.208191	-0.0399772	-0.303062	-0.227628	-0.162636	-0.268502	-0.23083	-0.272887
146836	-0.111592	-0.0572906	-0.247692	-0.13125	-0.164018	-0.126483	-0.0466672	0.238426	0.182297	-0.299114	-0.15484	-0.448982	-0.0939343	-0.204271	-0.477257	-0.0109287	-0.130858	-0.204402	0.0133065	-0.0965643	-0.0543233	0.0666271	0.0206437	0.00548959	-0.215244	-0.446108	-0.328461	-0.05293	-0.429127	-0.0582631	-0.176117	-0.538951	-0.0891123	-0.104105	-0.0968734	0.00559884	-0.163861	-0.392462	0.162076	-0.111955	0.0788487	-0.013347	-0.228536	-0.493411	-0.274504	-0.105222	-0.355108	-0.143299	0.0112173
146937	0.0529404	-0.0396958	-0.031834	0.0143332	-0.00414788	-0.0179561	0.0142063	0.0810653	0.0204126	-0.0897782	-0.0732834	0.0158291	0.008998	-0.146643	-0.12962	-0.107296	-0.100559	0.00738193	-0.0817595	-0.0855067	0.026366	0.0307055	-0.00251695	-0.00369257	-0.282164	-0.138406	-0.153542	-0.201788	-0.132816	-0.19364	-0.16131	-0.169167	-0.196439	-0.13882	-0.164468	0.0429657	-0.0497394	-0.124284	-0.029992	-0.0155279	0.0217731	-0.0856961	-0.0541385	-0.0464133	-0.100532	-0.0499956	-0.0343367	0.0107345	-0.128177
147636	0.0176398	-0.0286774	-0.155567	-0.0225655	-0.0589339	-0.0634244	-0.0688092	0.0513591	0.0354253	-0.0785228	-0.0553014	-0.112086	-0.0193241	-0.141842	-0.167104	-0.0182903	0.0030467	-0.0557663	-0.0124626	-0.0372168	-0.00695796	-0.0653324	-0.0551957	-0.0778107	-0.168035	-0.0671089	-0.127704	-0.133107	-0.217593	-0.146448	-0.0236004	-0.190813	-0.0530628	-0.0636981	-0.126609	-0.0899957	-0.0866096	-0.151927	-0.00333619	-0.0505504	-0.0299641	0.0186499	-0.0168796	-0.118237	-0.0574654	-0.0705352	-0.0394164	-0.00831123	-0.0241759
147737	-0.0876949	-0.00860682	-0.0508846	-0.0504635	-0.0240855	-0.0811607	-0.00994168	-0.00487153	0.0360376	-0.0993973	-0.0269624	-0.198566	-0.0124138	-0.166623	-0.361378	-0.0347106	-0.0565542	-0.0708524	-0.0156515	0.0158212	0.0192217	-0.0708269	0.0401908	-0.0574893	-0.0536936	-0.210226	-0.218916	-0.143433	-0.212593	-0.0426825	-0.102791	-0.178279	-0.108881	-0.0945476	-0.0819314	-0.180146	-0.167586	-0.260038	-0.00363191	-0.148852	-0.0397318	-0.034559	-0.0948549	-0.260701	-0.190112	-0.274124	0.00226749	-0.0548331	-0.096342
148032	0.0353645	-0.111191	-0.218007	0.0286594	-0.00691126	-0.0620047	0.190184	0.17216	0.11384	-0.413149	-0.205038	-0.224086	-0.0233554	-0.1072	-0.212442	-0.0669624	-0.184439	-0.155444	-0.0847504	-0.0936702	-0.116883	-0.220232	-0.053021	-0.00875163	-0.333836	-0.129007	-0.14933	-0.266384	-0.144547	-0.00308689	-0.0610924	-0.308847	0.081626	-0.0476541	-0.195499	-0.0641536	-0.256763	-0.290927	-0.107736	-0.0816772	0.00603654	-0.0731387	-0.176865	-0.269419	-0.230691	-0.266246	-0.32761	-0.123067	-0.0996959
148133	-0.0286411	-0.0428202	-0.163948	-0.100318	-0.159487	-0.0993072	-0.125338	0.0117769	0.0322023	-0.171547	-0.0939716	-0.10205	-0.169006	0.0138014	-0.0689956	-0.147126	-0.139301	-0.0622606	-0.102232	-0.123	-0.0525567	-0.114839	-0.0532845	-0.0206725	-0.305673	-0.167796	-0.0701501	-0.107742	-0.0492077	0.0825297	0.0863915	-0.0749354	0.0911043	0.00578757	-0.0356375	-0.021888	-0.109725	-0.159905	-0.111881	-0.0821579	0.00333092	-0.123241	-0.109857	-0.200975	-0.242519	-0.24378	-0.0740325	-0.0871607	-0.0873193
148335	-0.0738502	-0.0297721	-0.169693	-0.155023	-0.160408	-0.137296	-0.0699794	0.100096	0.124208	-0.166494	-0.133656	-0.259968	-0.131369	-0.209461	-0.326521	-0.280006	-0.181291	-0.123837	-0.127328	-0.0443869	-0.0489088	-0.194433	0.00442887	-0.057352	-0.211895	-0.0769759	-0.343105	-0.14728	-0.405713	-0.140603	0.0391399	-0.250284	-0.12098	-0.203082	-0.245369	-0.0738426	-0.0416622	-0.249309	0.0696443	-0.131358	0.0822648	-0.0963705	0.0442062	-0.144486	-0.246797	-0.178172	-0.155744	-0.107077	-0.118633
148436	-0.125423	0.0649443	-0.0809264	0.00369168	0.0661566	0.0788035	0.0605247	0.133188	0.144029	-0.375911	-0.109912	-0.306273	0.102963	-0.057526	-0.290452	0.115898	-0.336356	0.0587165	0.0349794	0.126801	0.121178	0.0707048	0.0311872	0.0273445	-0.117913	-0.15944	-0.260662	-0.258496	0.0854317	0.00047659	-0.0706899	-0.161433	-0.0545993	-0.0479343	-0.227723	-0.0297669	-0.191549	-0.302384	0.0724468	-0.103281	0.0930553	0.042455	0.0217026	-0.235501	-0.2837	-0.340598	-0.00617696	-0.006573	-0.00116345
148840	-0.0654201	-0.0561584	-0.120422	-0.0722926	-0.0657554	-0.039339	-0.0411726	0.0902677	0.10799	-0.174256	-0.170999	-0.333231	-0.0808536	-0.0404192	-0.157285	-0.130787	-0.0900786	-0.109148	-0.142798	-0.117425	-0.0262583	-0.122848	-0.0722128	0.0141931	-0.139227	-0.0921314	-0.334357	-0.0115144	-0.162358	-0.0744635	-0.0225989	-0.244135	-0.0118893	-0.0137301	-0.130937	-0.168203	-0.0996066	-0.22042	-0.118332	-0.0958822	-0.0339984	-0.162512	-0.242597	-0.242603	-0.287651	-0.335632	-0.166153	-0.161623	-0.102857
148941	-0.0858691	-0.168374	-0.201576	-0.18827	-0.190998	-0.162776	-0.146472	-0.121967	-0.11555	-0.237773	-0.102678	-0.0891515	-0.190873	-0.0646353	-0.0816849	-0.233717	-0.206026	-0.185455	-0.19133	-0.118497	-0.134514	-0.113139	-0.186895	0.015034	-0.207617	-0.0329589	-0.0893589	-0.0970614	0.0158675	0.032726	-0.221484	0.0103915	-0.00986269	0.0593058	0.0199553	-0.093603	-0.126849	-0.0709585	-0.090248	-0.0943197	-0.0570611	-0.169453	-0.114075	-0.153284	-0.222629	-0.229965	-0.116373	-0.138785	-0.250488
149236	-0.0965894	-0.0427663	-0.118243	-0.0346941	-0.140495	-0.172236	-0.164073	0.0609535	0.129634	-0.258946	-0.289364	-0.225298	-0.0870629	-0.0711561	-0.100513	-0.1272	-0.131566	-0.0744877	-0.13664	-0.201305	-0.161966	-0.102415	-0.0392821	-0.0190176	-0.414861	-0.0402405	-0.287383	-0.147049	-0.196395	-0.0716548	-0.0110517	-0.218008	0.090449	-0.0372924	-0.238313	-0.0911809	-0.209972	-0.36522	0.0665736	0.00362217	0.0632967	-0.053456	-0.162763	-0.197692	-0.0752314	-0.307485	-0.0963938	-0.103372	-0.0375135
149337	0.0390446	0.0257941	-0.0728386	0.0385617	-0.0939414	-0.122755	-0.28074	0.0808758	-0.00330732	-0.347414	-0.216938	-0.384382	-0.0516269	-0.17151	-0.165419	-0.0774877	-0.0150935	-0.389902	-0.103775	-0.0929476	-0.0676442	-0.17022	0.0834378	-0.236481	-0.4248	-0.0992436	-0.240281	-0.31582	-0.0481254	0.0309639	-0.0831486	-0.248714	-0.0217905	-0.15707	-0.323777	-0.0456543	-0.074093	-0.310048	-0.0164878	-0.0710611	-0.0848858	-0.0782281	-0.201655	-0.221955	-0.339884	-0.0579712	-0.344838	-0.160982	-0.15006
149539	0.0149134	0.017887	0.0365331	-0.00411476	-0.0288396	-0.0215955	-0.00377408	0.0903394	0.0908887	-0.111324	-0.174746	-0.30895	-0.0172114	-0.0124735	-0.180198	-0.00580839	-0.0285019	-0.0265375	-0.0364378	-0.0137626	-0.0166857	-0.0866576	0.0449933	0.00279005	-0.24642	-0.0368812	-0.158967	-0.201142	-0.175739	-0.00249258	-0.021734	-0.197358	0.0900963	-0.00929471	-0.0542993	-0.0899643	-0.101385	-0.154649	-0.0349899	-0.0917854	0.0267666	-0.0578837	-0.0890191	-0.179682	-0.171579	-0.201254	-0.062316	-0.0601841	-0.116682
149741	-0.074179	-0.0764512	-0.077452	-0.0972339	-0.113918	-0.100917	-0.0868944	-0.0768062	-0.058698	-0.11238	0.0024631	-0.0880357	-0.124223	-0.00979176	-0.0450101	-0.0585071	-0.0492677	-0.144007	-0.100656	-0.0831225	-0.0988836	-0.0763829	-0.0702944	-0.0092501	-0.0618877	-0.0315672	-0.0793477	-0.0310131	0.053301	0.0492682	-0.00297953	-0.00553279	0.00992271	0.00260763	0.0147515	-0.115143	-0.0547979	-0.0859063	-0.0493698	-0.126139	0.00993474	-0.0869357	-0.0426868	-0.122183	-0.0891608	-0.0898064	-0.0715526	-0.160976	-0.0760366
149842	-0.124724	-0.174646	-0.192946	-0.132839	-0.165599	-0.189967	-0.11432	-0.0110721	0.0292258	-0.18709	-0.173826	-0.212342	-0.124479	-0.175426	-0.158982	-0.137571	-0.123008	-0.0156151	-0.192191	-0.162009	-0.151382	-0.143602	-0.0172194	-0.0527367	-0.233916	-0.243656	-0.316987	-0.207055	-0.041693	0.00348312	-0.0712564	-0.253075	-0.0452544	0.0311593	0.0207023	-0.14868	-0.189308	-0.26535	-0.0671405	-0.0797956	-0.0337497	-0.129333	-0.0440866	-0.1319	-0.108326	-0.165218	-0.0688463	-0.0796982	-0.0870335
150625	-0.10019	0.0454842	-0.217887	-0.0816077	-0.0592706	0.00730066	-0.0266764	0.0292722	0.0498041	-0.326132	-0.189672	-0.245374	-0.0535107	-0.104791	-0.307403	-0.0402336	-0.0568063	-0.0393751	-0.0806632	-0.0793163	0.032957	0.00518771	0.0443152	-0.101003	-0.178251	-0.317557	-0.256026	-0.268521	-0.178113	-0.00538471	-0.0456499	-0.27673	0.0618969	-0.127877	0.019594	-0.261822	-0.273234	-0.378068	-0.00151646	-0.0789905	0.0579903	0.0080501	-0.147805	-0.243508	-0.347133	-0.356314	-0.0120124	-0.094017	0.034737
150726	0.0132788	-0.0235599	-0.18198	-0.0481297	-0.0288515	0.0267365	-0.0947812	0.0938791	0.165565	-0.559676	-0.304571	-0.447164	-0.0070471	-0.329205	-0.499297	-0.0190099	-0.00696437	0.0659966	-0.0226955	0.0555525	0.00175991	0.0234135	0.0526849	0.0617221	-0.39243	0.0125384	-0.225039	-0.333935	-0.443149	-0.290436	-0.201652	-0.482061	-0.0564307	-0.205719	-0.155424	-0.05748	-0.29767	-0.470753	0.0139511	-0.211543	-0.125997	-0.303269	-0.165724	-0.516276	-0.47657	-0.321509	-0.130177	-0.27923	-0.25148
150928	0.0944858	0.0502115	-0.0470562	0.0577422	0.0789558	0.0292473	-0.00970873	0.0615123	0.0846266	-0.178512	-0.233727	-0.300847	0.0285125	-0.0726904	-0.219967	0.0322402	-0.168654	0.0119849	0.0372167	0.0544501	0.0240836	0.0103374	0.0898824	-0.0319781	-0.373811	-0.171169	-0.220803	-0.182849	-0.193717	0.00824347	0.10332	-0.237652	0.0591505	-0.0133238	-0.0804054	-0.0139326	-0.131404	-0.240107	0.0290141	-0.197928	0.104657	0.00442851	-0.0662574	-0.290968	-0.248899	-0.281431	0.0084349	0.026589	-0.030301
151223	-0.0757713	-0.00968401	-0.104998	-0.123946	-0.0726757	-0.0324747	-0.0232766	0.114242	0.0986725	-0.305136	-0.220324	-0.115104	-0.0743122	-0.0547235	-0.089646	-0.0629095	-0.0956575	-0.00818668	-0.0886767	-0.0456144	0.0546986	0.0974396	-0.0618994	0.0423636	-0.225635	0.00649541	-0.245033	-0.0613071	0.036691	0.0140011	-0.0640045	-0.0824439	-0.00499268	0.0205322	-0.0627565	-0.0770592	-0.0670724	-0.164203	0.0819432	-0.0110988	0.0592667	0.0438938	-0.0428459	-0.140329	-0.207335	-0.178031	-0.134958	-0.0335523	-0.0203621
151324	-0.210874	-0.103468	-0.241877	-0.135393	-0.138796	-0.0939328	-0.0476864	-0.0185102	-0.0441024	-0.0879275	-0.046916	-0.166183	-0.157305	-0.070815	-0.0812014	-0.150275	-0.123435	-0.111534	-0.065316	-0.0977829	-0.138596	-0.116266	-0.0788172	-0.0120764	-0.116291	0.0258725	-0.145016	-0.111104	-0.0552229	0.013572	-0.0221468	-0.028379	0.0499452	0.034447	-0.0153655	-0.0791065	-0.13307	-0.114999	-0.00360114	-0.0361105	0.0177739	-0.120697	-0.0325623	-0.119962	-0.126186	-0.178221	-0.0950334	-0.0946916	-0.0687162
151425	-0.221927	-0.0856512	-0.065736	-0.216366	-0.179938	-0.182649	-0.200717	0.00245891	0.0145584	-0.108977	-0.198134	-0.208796	-0.119217	-0.206801	-0.269616	-0.174758	-0.158659	-0.229981	-0.107793	-0.167071	-0.131527	-0.115164	-0.0733696	-0.0445055	0.0564774	-0.0756693	-0.313676	-0.107982	-0.0226621	0.0655333	-0.102882	-0.0595631	0.0347194	0.0333303	-0.0445862	-0.162139	-0.149055	-0.191985	-0.113804	-0.0441049	-0.00861252	-0.188926	-0.109892	-0.175691	-0.276123	-0.301367	-0.145734	-0.152391	-0.248426
151627	-0.00319135	0.0466253	-0.158457	-0.0035294	-0.0180867	0.0399154	0.0358565	0.0287923	0.0526774	-0.12852	0.0127832	-0.142703	-0.0158863	-0.315677	-0.35004	0.0354178	0.0847962	0.0501676	0.0715726	0.0375061	0.0361637	-0.000656978	0.0306278	0.0565654	-0.0167125	0.106631	-0.320656	-0.084835	-0.18826	-0.247308	-0.243893	-0.326802	-0.240126	-0.266713	-0.259854	-0.00727574	0.0180401	-0.13347	-0.00965707	-0.00384128	0.0505947	0.137986	0.165058	-0.0781864	-0.155872	-0.00205152	0.0488404	0.0933071	0.151759
151728	-0.0887941	0.0232527	-0.261375	-0.0847383	-0.023331	-0.0254896	0.010082	-0.0700789	-0.0641433	-0.303773	-0.186686	-0.196806	-0.0274627	-0.137956	-0.273304	-0.0933561	-0.0482512	0.0601763	-0.0949981	0.0252637	-0.0125003	-0.0439353	-0.0346104	-0.103121	-0.309454	-0.116939	-0.346062	-0.130803	-0.156223	0.0191224	-0.0871096	-0.0332573	0.052307	-0.0102218	-0.131605	-0.136292	-0.296567	-0.315088	-0.0512128	-0.0665158	-0.0358782	-0.181938	-0.209941	-0.25636	-0.221025	-0.179252	-0.173638	-0.0333584	-0.133292
151829	-0.092597	-0.0730734	-0.109723	-0.10312	-0.140098	-0.129754	-0.0842946	0.119298	0.117171	-0.181261	-0.0869941	-0.272183	-0.0801057	-0.0568485	-0.116012	-0.117156	-0.112242	-0.0740213	-0.140824	-0.12452	-0.0949637	-0.0582735	-0.0609093	0.0393798	-0.187609	-0.20236	-0.380023	-0.292003	-0.131523	0.0511824	-0.0161379	-0.19038	0.0146718	-0.098973	-0.130949	-0.108152	-0.101427	-0.260527	-0.0746456	-0.0449786	-0.0212011	-0.0225843	-0.0288497	-0.202278	-0.309155	-0.170804	-0.204496	-0.175478	-0.0952632
151930	-0.0701873	-0.0822876	-0.114595	-0.130006	-0.135118	-0.104134	-0.13109	0.0858881	0.12232	-0.0816475	-0.0110726	-0.0919628	-0.0804821	-0.152179	-0.178967	-0.0981132	-0.149138	-0.0283722	-0.0920227	-0.116968	-0.13239	-0.110197	-0.103104	0.0297082	-0.115877	0.0140902	-0.205233	-0.112657	-0.111699	-0.0691776	-0.107828	-0.0104786	-0.00850776	-0.0611429	-0.128255	0.0215566	-0.0920681	-0.0891592	-0.061183	0.0553908	0.107771	-0.119623	-0.0166167	-0.0532676	-0.231655	-0.174861	-0.0311766	-0.0973254	-0.133794
152225	-0.0748131	-0.0545695	-0.116125	-0.222524	-0.225531	-0.1605	-0.117702	0.0505446	0.0527045	-0.206697	-0.067921	-0.0409632	-0.147227	0.0144119	-0.12755	-0.143797	-0.13488	-0.149592	-0.122748	-0.12465	-0.110318	-0.0644542	-0.073065	0.0460673	-0.0890517	-0.0200547	-0.0229005	-0.0178551	0.0010003	0.0490063	0.0726747	-0.0466784	0.0762596	0.040714	-0.0301465	-0.0092686	-0.00345025	-0.107546	0.0380538	0.0398659	0.0259929	0.00345543	-0.0702957	-0.0824071	-0.0209652	0.0169892	0.0558015	0.0444941	0.00280224
152427	-0.0183308	-0.0979735	-0.031432	-0.0443745	-0.0691941	-0.107042	-0.0337575	0.114976	0.120939	-0.170623	-0.0789371	-0.08337	-0.0984318	0.020686	-0.133045	-0.111592	-0.133475	-0.0670807	-0.0889106	-0.117572	-0.0946088	-0.0811067	-0.0791418	0.0669391	-0.198202	-0.0688609	-0.267197	-0.181544	-0.0732366	0.022148	-0.00544551	-0.119337	0.0586756	0.0105173	-0.0591734	-0.101536	-0.080658	-0.147813	-0.00765531	-0.204496	0.0253963	-0.110568	-0.0666353	-0.168201	-0.254919	-0.19437	-0.21456	-0.145562	-0.0935498
152831	-0.0790408	-0.0771035	0.0121756	-0.0870311	-0.0774657	-0.0596733	-0.0969406	0.116531	0.10639	-0.0710242	-0.0906891	-0.0992882	-0.092569	0.0585972	0.00420237	-0.0899117	-0.0745011	-0.0881455	-0.0941679	-0.0535914	-0.0905745	-0.0660494	-0.0711022	0.0659298	-0.0261882	-0.0234185	-0.0255983	-0.00580442	-0.0133413	0.0119211	0.051763	-0.00996066	0.0382552	0.0425556	-0.0313867	0.0938277	-0.049394	-0.0470801	0.0665104	0.085002	0.0389346	-0.0264279	0.0641497	-0.0962159	-0.0850345	-0.0695403	-0.108174	-0.133867	-0.0822834
153025	-0.0642331	-0.0088326	-0.125335	-0.122531	-0.090889	-0.0271621	-0.0331445	-0.116586	-0.0864769	-0.0990236	-0.0267471	-0.0755644	-0.0809531	-0.0601466	-0.0761251	-0.0723177	-0.0879454	-0.115631	0.0195152	-0.0767988	-0.0631358	-0.115641	-0.054851	0.0132329	-0.0983355	-0.0269808	-0.0590194	-0.0812129	-0.0291756	-0.00573657	-0.074945	0.0746541	-0.0552321	0.00308031	-0.0170395	-0.0870281	-0.0319268	-0.0115938	-0.103456	-0.0631358	-0.0362532	-0.080349	-0.0601745	-0.102798	-0.0635349	-0.047098	-0.142583	-0.0293583	-0.0737707
153126	-0.237975	-0.138954	-0.301663	-0.34458	-0.306253	-0.204442	-0.197949	0.0184464	0.017237	-0.386946	-0.244284	-0.332978	-0.254087	0.0591857	-0.158675	-0.263965	-0.202766	-0.282704	-0.217665	-0.153248	-0.112729	-0.126364	-0.141268	-0.0161018	-0.301276	0.00471777	-0.127039	-0.249489	-0.0921525	0.116361	-0.0266676	-0.0746187	0.0654198	0.107611	0.0820376	-0.097429	-0.188943	-0.289763	-0.0960823	-0.199298	-0.0519105	-0.273429	-0.198671	-0.227475	-0.254015	-0.204185	-0.282196	-0.284147	-0.280351
153227	-0.116167	-0.00107843	-0.139834	-0.149743	-0.145122	-0.17844	-0.159893	-0.0625422	0.0593233	-0.153023	-0.156361	-0.206823	-0.0699651	-0.108657	-0.146429	-0.115834	-0.103166	-0.00514846	-0.042104	-0.0975799	-0.051512	-0.0453861	-0.0509848	-0.020269	-0.11848	-0.0435964	0.00851562	-0.300759	0.102553	0.192513	0.00475257	-0.084185	0.143134	0.0326064	0.0695951	-0.0956546	-0.227914	-0.29521	-0.149704	-0.101784	-0.0880578	-0.189988	-0.204765	-0.256659	-0.315941	-0.284934	-0.152245	-0.0964478	-0.271903
153429	-0.092656	-0.0698079	-0.214089	-0.0834267	-0.0344178	-0.0126245	-0.0917027	0.0960477	0.106161	-0.0892747	-0.111871	-0.190424	-0.0706161	-0.0975759	-0.190256	0.0654311	0.0298397	-0.0370465	0.0685783	-0.0370978	0.0357274	0.013304	-0.0581147	0.0453784	-0.245706	0.00965529	-0.281854	-0.199023	-0.149887	0.00378546	-0.1433	-0.15041	0.0393971	0.0394499	0.0106732	-0.0281793	-0.139954	-0.218091	0.0679076	-0.114284	-0.0231744	0.0363573	-0.164084	-0.171933	-0.1593	-0.146532	-0.168425	0.000908844	0.0543213
153631	-0.023847	0.0161477	-0.11365	-0.036568	-0.0730118	-0.00484833	0.00647223	-0.00355987	-0.00451538	-0.0996292	-0.263035	-0.330929	-0.0556745	-0.0727771	-0.161401	-0.0882155	-0.182773	-0.149884	-0.00825395	0.0572009	0.0639297	0.10748	0.0221892	0.0957288	-0.0134111	-0.126251	-0.112423	-0.142041	-0.125856	-0.127026	-0.0788368	-0.040215	-0.0322759	-0.0337328	-0.0760198	0.0125943	-0.00423998	-0.0257009	0.0458272	-0.0344093	0.00297163	-0.00221833	-0.0717448	-0.159837	-0.0707698	-0.207722	-0.130599	-0.092417	0.00264711
153732	-0.0852593	0.0367058	-0.177496	-0.114573	-0.0910778	-0.032051	-0.00172929	0.0854092	0.0940005	-0.185653	-0.0794481	-0.231522	-0.087658	0.0270684	-0.147052	-0.182549	-0.10497	0.00929908	-0.0506489	-0.020861	-0.0193187	-0.0664798	0.0466113	0.0186326	-0.190689	-0.101795	-0.162824	-0.0401041	-0.142009	0.0138726	-0.0121188	-0.0541254	0.0395985	0.0444148	0.0199133	-0.0414495	-0.122745	-0.192036	0.0388567	0.0404611	0.0585671	-0.0565087	-0.0995092	-0.133133	-0.191599	-0.245884	-0.00956326	-0.0262684	-0.18262
153934	-0.0716536	-0.109096	-0.0544824	-0.0440158	-0.0355436	-0.0775872	-0.0766935	0.0706804	0.0687233	-0.1976	-0.116483	-0.165389	-0.0514419	-0.01391	-0.0522236	-0.132376	-0.0451239	-0.0764049	-0.0302254	-0.0897639	-0.0528133	-0.0420105	0.00925681	-0.0675441	-0.247827	-0.112962	-0.19626	-0.146851	-0.0219884	0.0278753	0.0300336	-0.0862461	0.0810259	-0.0185041	-0.0170301	0.0479752	-0.0454217	0.00357838	0.0856451	0.0563228	0.0563453	-0.0725884	-0.0152731	-0.154347	-0.0997711	-0.127397	-0.0427972	-0.0808163	-0.0995424
154229	-0.0591792	0.0578454	-0.0297231	-0.0200194	-0.0595637	-0.0864899	0.111212	0.0369856	0.0264894	-0.0159448	-0.197152	-0.219409	-0.00500401	-0.1965	-0.163412	0.0414204	-0.249979	0.0285432	0.0400575	-0.0851938	-0.0512071	-0.0223586	0.074669	-0.0439291	-0.0814118	0.00615156	-0.209533	-0.321758	-0.0256654	-0.0598119	-0.178974	-0.149417	-0.090622	-0.112586	-0.184362	-0.164279	-0.162187	-0.335219	0.0234607	-0.0911102	0.141961	0.0575111	0.0793994	-0.12331	-0.0455822	-0.386029	-0.0397881	-0.0530642	0.0172593
154330	0.0118586	-0.0176543	-0.0388364	-0.0262175	-0.00494483	-0.0027774	0.0240412	-0.0198768	-0.0347205	-0.193689	-0.058062	-0.129807	-0.0124472	-0.0808045	-0.155746	-0.0344875	-0.0136297	0.0150718	-0.00647085	-0.0320327	-0.00432667	-0.0479809	0.0191984	-0.0539101	-0.0459741	-0.077769	-0.0228262	-0.045535	-0.0338589	-0.0120784	-0.0374414	-0.115853	-0.0306311	-0.0437172	-0.0296292	0.00908402	-0.0931747	-0.160585	0.0284784	-0.0602331	-0.0159684	0.0055015	-0.0313724	-0.0824668	-0.0500339	-0.136358	-0.0476268	-0.0211094	0.0033739
154431	-0.0906503	-0.0198255	-0.161441	-0.162403	-0.107072	-0.049763	-0.159606	-0.0298104	-0.00854533	-0.016523	-0.0832958	-0.101896	-0.114763	-0.0186277	-0.116299	-0.0833635	-0.107556	-0.0937319	-0.153835	-0.0742391	0.00936507	-0.0383315	-0.0283867	-0.0864335	-0.163322	-0.0348648	-0.125427	-0.0788952	-0.0564001	0.0287818	-0.0353626	-0.068002	0.0387226	0.0280696	-0.0358784	-0.158	-0.133984	-0.178241	-0.0363509	-0.0775888	0.00200241	-0.0523563	-0.109619	-0.131561	-0.124543	-0.161729	-0.0631409	-0.0903665	-0.106606
154532	-0.0275237	-0.0996143	-0.397804	-0.0479863	-0.121781	-0.0264967	0.0102482	0.124134	0.0876202	-0.489293	-0.252898	-0.375987	-0.088735	-0.161579	-0.35702	0.0662601	-0.287854	-0.111341	0.0125667	0.041257	-0.00255777	0.0683066	-0.0619875	-0.0345923	-0.218852	-0.188697	-0.144573	-0.239489	-0.210345	-0.15406	-0.155254	-0.313604	-0.116942	-0.00365085	-0.171996	-0.151674	-0.0836886	-0.223508	0.0259963	-0.115434	-0.00336747	-0.0315163	-0.00737347	-0.229265	-0.09689	-0.201802	-0.228765	-0.325691	-0.0634857
154734	-0.0128621	-0.0317268	-0.252731	-0.082547	-0.0301087	-0.11172	0.0596306	0.00887698	0.0205713	-0.340689	-0.308607	-0.40505	-0.0911228	-0.0162197	-0.290126	-0.0745849	-0.191579	-0.0029653	0.026612	-0.0355035	-0.00729268	-0.0324454	-0.0404365	-0.0342582	-0.190092	-0.291792	-0.242255	-0.0385557	-0.304584	0.100743	-0.0238085	-0.0845073	0.178129	-0.0819348	-0.250276	-0.21279	-0.220974	-0.387387	0.00329977	-0.10186	0.018701	-0.200913	-0.121086	-0.270687	-0.265816	-0.330264	-0.198517	-0.0306926	-0.397369
154835	0.0644413	0.0872673	-0.0924949	0.0596526	0.00572504	-0.0324835	0.097242	0.156402	0.181212	-0.10664	-0.157565	-0.256881	-0.00874314	-0.138451	-0.305745	7.20779e-06	-0.0869911	-0.0155843	-0.0604619	-0.0283008	-0.0116371	-0.0528717	0.0381082	-0.112639	-0.331117	-0.0452203	-0.286653	-0.293045	-0.179628	-0.200313	-0.127113	-0.272211	-0.0781179	-0.170131	-0.192173	-0.0415137	-0.111447	-0.15038	0.00659046	0.0277018	0.0154323	-0.057795	-0.0677604	-0.0680716	-0.319458	-0.480516	-0.231429	-0.322776	-0.0601296
154936	-0.139349	0.0910834	-0.213226	-0.124707	-0.150644	-0.0691559	-0.136854	0.0615325	-0.0145628	-0.241028	-0.0911174	-0.103051	-0.0701135	-0.138578	-0.288631	-0.109996	-0.0211906	-0.00888803	-0.0930733	-0.0716836	-0.0312339	-0.0397277	0.034739	-0.16482	-0.241484	0.00974205	-0.0928055	-0.0741812	-0.0804731	0.0665539	-0.173662	-0.209781	0.0569741	-0.0391683	-0.148058	-0.150898	-0.187751	-0.272569	-0.00741077	-0.0400556	0.00435161	-0.0945008	-0.122073	-0.124038	-0.0951754	-0.204779	-0.0526994	-0.0272274	-0.127765
155635	-0.213024	0.151053	-0.290324	-0.120956	-0.0929559	0.00926375	0.0320711	-0.0431785	0.0437362	-0.579176	-0.25717	-0.539813	-0.230579	-0.151964	-0.356786	-0.250684	-0.287157	-0.0553587	-0.206401	-0.0434086	-0.0560946	0.00310767	0.0991213	0.0334632	-0.227782	-0.163589	-0.335103	-0.158102	-0.238182	-0.00253212	-0.119764	-0.108137	-0.00685876	-0.0342517	-0.04123	-0.164397	-0.13675	-0.341591	-0.102819	-0.225924	-0.0714704	-0.193528	-0.279146	-0.457078	-0.387787	-0.296179	-0.237123	-0.214518	-0.399309
155938	-0.239555	0.0467778	-0.0681859	-0.255272	-0.21766	-0.178762	-0.18729	0.165205	0.142812	0.00292445	-0.196962	-0.28599	-0.216496	-0.0411748	-0.215817	-0.111563	-0.0549799	-0.085746	-0.115982	-0.0486795	-0.0740242	-0.181764	0.0690616	-0.0589969	-0.164032	-0.0173326	-0.0713501	0.00460737	-0.0395057	0.00520782	-0.0125176	-0.0872543	0.139972	-0.00361283	-0.0507616	-0.132238	-0.212248	-0.262017	0.0611111	0.0115336	0.0215194	0.0626913	-0.0199896	-0.0856129	-0.0752805	-0.253991	0.0278721	2.9476e-05	0.0507723
156031	-0.14511	-0.156545	-0.216245	-0.198109	-0.235458	-0.170341	-0.153343	0.0402081	0.119531	-0.298565	-0.0766936	-0.273189	-0.299064	-0.029888	-0.174069	-0.280228	-0.224153	-0.251387	-0.233899	-0.159062	-0.16401	-0.230266	-0.115355	-0.136297	-0.369035	-0.140116	-0.236905	-0.386188	-0.0674166	0.0651502	-0.0446633	-0.169177	0.112827	0.0484758	-0.00119127	-0.172573	-0.172335	-0.21054	-0.0503987	-0.0568672	-0.00163128	-0.261086	-0.16253	-0.282254	-0.0747124	-0.208418	-0.142745	-0.119696	-0.211486
156233	-0.157533	-0.0695776	-0.113487	-0.190787	-0.174007	-0.0959742	-0.129308	0.0268112	0.00940624	-0.0740991	-0.0190906	-0.0888687	-0.128028	-0.0913912	-0.062238	-0.12891	-0.0781246	-0.146805	-0.0852228	-0.101914	-0.0835811	-0.101886	-0.0775157	0.0091294	-0.036835	0.0242136	-0.0634532	-0.0553098	-0.0246195	0.0225714	-0.050899	-0.0568919	0.0154346	-0.00323141	-0.0186343	0.0148087	-0.0169069	-0.0403026	0.0122302	-0.0070633	-0.0120437	-0.05525	-0.00819813	-0.00216327	-0.0995495	-0.100574	-0.0217132	-0.0573695	-0.0446729
156334	-0.00142079	0.0465817	-0.0660154	-0.0150418	-0.0692666	-0.0710415	0.023091	0.02784	0.081358	-0.293507	-0.122195	-0.231155	-0.0596881	-0.105567	-0.339659	-0.0959132	-0.242096	-0.064107	-0.037177	-0.0727615	-0.0376229	-0.0515962	0.045226	0.0840395	-0.103704	-0.173933	-0.169694	-0.191544	-0.296304	0.123032	-0.0595765	-0.12515	-0.0179856	-0.0688966	-0.0761823	-0.0541379	-0.0776772	-0.137324	-0.00253635	0.0491302	0.087183	-0.0285851	-0.127174	-0.311569	-0.214763	-0.243406	-0.00779196	-0.106123	-0.0723326
156435	-0.0837718	-0.165244	-0.225651	-0.11304	-0.132632	-0.0920404	-0.08788	0.069629	0.0674094	-0.143647	-0.151242	-0.0602376	-0.171277	-0.11746	-0.150394	-0.209782	-0.170213	-0.218186	-0.207077	-0.134336	-0.135739	-0.118512	-0.137595	-0.0188222	0.0133026	-0.0853138	-0.198248	-0.169209	-0.0724142	0.0167169	-0.00063768	-0.103971	0.0500007	-0.0293014	0.0211082	-0.0676964	-0.134203	-0.1436	-0.0270021	-0.031387	0.0511577	-0.0496845	-0.0923061	-0.0859981	-0.227832	-0.210297	-0.168637	-0.144259	-0.133162
156536	-0.0748756	-0.0443384	-0.0119649	-0.0643448	-0.0932297	-0.0598608	0.0673468	0.0631109	0.0608079	-0.117453	-0.00790148	-0.0304059	-0.0511747	-0.142619	-0.246036	0.0180651	-0.0195257	0.115218	0.0172298	0.041447	-0.0552261	-0.0479974	0.0374433	-0.0660259	-0.162875	-0.0900025	-0.173859	-0.00753962	-0.141348	-0.0228973	-0.127937	-0.142491	-0.0308605	-0.0185831	-0.129648	-0.0889294	-0.0803653	-0.203987	0.0135201	-0.066994	0.00113936	0.0774607	-0.103627	-0.140853	-0.108318	0.0222088	0.0184914	0.0111585	0.0432067
156637	0.0138595	0.0199908	-0.0941876	-0.039874	-0.0365685	0.00557305	-0.016785	0.0492554	0.0438889	-0.0362958	-0.0606253	-0.053438	-0.033254	-0.143977	-0.249597	-0.0123817	0.0161856	0.0178014	0.000331912	0.0565589	0.0496498	0.0110829	0.0132729	0.062774	-0.0233134	-0.0211392	-0.192615	-0.089037	-0.215858	-0.135332	-0.157621	-0.145384	-0.00835249	0.0229499	-0.114991	-0.1255	-0.217156	-0.217066	-0.0370882	-0.0936002	0.00416732	-0.0305541	-0.113474	-0.0339694	-0.236253	-0.122588	-0.0119828	0.0471083	-0.0664728
157336	-0.165695	-0.0230074	-0.157628	-0.125142	-0.16641	-0.103646	-0.136549	0.059509	0.0433546	-0.179881	-0.244373	-0.210831	-0.0835708	-0.196675	-0.241847	-0.151068	-0.183505	-0.162823	-0.113347	-0.101836	-0.0647019	-0.110912	0.0419475	-0.0353919	-0.189854	-0.321569	-0.171592	-0.355249	-0.234335	-0.0251918	-0.0150307	-0.0607545	0.017769	0.133718	0.0871081	-0.195102	-0.303085	-0.304191	-0.0860666	-0.0637007	-0.0641605	-0.195	-0.12326	-0.268238	-0.404332	-0.244185	-0.231547	-0.242829	-0.217334
157437	0.0146061	0.00476592	-0.0917367	0.00564703	-0.00889881	0.0216691	-0.0313505	0.0393936	0.0123396	-0.13703	-0.0604844	-0.124468	-0.0922439	-0.102868	-0.0835516	-0.0822188	-0.081024	-0.0239301	-0.0342147	0.0209817	0.033872	-0.0521853	-0.0426544	-0.0453778	-0.180158	-0.0411108	-0.0657624	-0.0460986	-0.0847178	-0.0492011	0.0176066	-0.0930751	0.089535	-0.0644158	-0.119121	-0.0922938	-0.145251	-0.172734	-0.0983826	-0.103927	-0.0667602	-0.126108	-0.0721164	-0.118549	-0.153815	-0.1735	-0.132325	0.00629408	-0.133894
157942	0.0602827	-0.0350823	-0.0878975	0.0926106	0.0703823	0.0860791	0.061612	-0.0284757	-0.0210193	-0.0489768	-0.067681	-0.073464	0.0390837	-0.0932226	-0.0594106	0.0531115	0.0183161	-0.0538451	0.0468623	0.06885	-0.038127	-0.00942989	-0.0463192	-0.0930171	-0.0478092	-0.06181	-0.0456686	-0.0647156	0.0102975	-0.0746362	-0.141006	-0.0232349	-0.0793835	-0.0169721	-0.0612367	-0.01292	0.00465077	-0.0646721	0.00207434	-0.0699291	-0.0099438	0.0300074	-0.00490215	-0.0138255	0.0195721	0.0235219	-0.0198797	0.0357095	0.0247936
158035	-0.103537	-0.0270066	-0.294701	-0.145323	-0.117654	-0.00122713	-0.0458116	0.0525551	0.0527358	-0.232795	-0.0335904	-0.212688	-0.0758567	-0.162666	-0.103753	-0.137478	-0.104813	-0.0646761	-0.118489	-0.0952236	-0.0208083	0.0105479	-0.21296	-0.0907321	-0.241666	-0.050826	-0.179161	-0.109803	-0.0640811	0.0540217	-0.0593728	-0.195347	-0.0350666	0.00159626	0.0449752	-0.0948343	-0.281063	-0.295732	-0.254292	-0.0617443	-0.139663	-0.13902	-0.248385	-0.281428	-0.269231	-0.296416	-0.230056	-0.0322561	-0.131274
158136	-0.253426	-0.123841	-0.222081	-0.218075	-0.229396	-0.157682	-0.286743	-0.0666425	0.0887623	-0.237786	-0.460587	-0.379821	-0.114834	-0.050316	-0.184845	-0.190542	-0.299359	-0.234532	-0.124342	-0.110087	-0.118388	-0.110532	-0.166029	-0.0548587	-0.489658	0.0175343	-0.195741	-0.458139	0.250158	0.194487	0.0298223	-0.181957	0.0717177	0.154993	0.086365	-0.248717	-0.420201	-0.346227	-0.0425562	-0.249419	-0.199762	-0.173598	-0.227089	-0.284184	-0.302409	-0.288124	-0.276589	-0.190854	-0.189768
158338	-0.098733	0.0378408	-0.162831	-0.11287	-0.11454	-0.0612761	-0.0248258	0.0135854	0.053141	-0.110252	-0.068102	-0.247805	-0.0408374	-0.178522	-0.363121	-0.0527055	-0.103229	-0.0399208	-0.0896022	-0.0217619	-0.0382965	-0.181016	0.0200125	0.123569	-0.193039	-0.168947	-0.431337	-0.220675	-0.206656	-0.106787	-0.223687	-0.330881	-0.115457	0.0485067	-0.00387275	-0.130816	-0.20713	-0.430184	0.0656986	-0.184735	0.0807917	-0.0302425	0.00258575	-0.20438	-0.31903	-0.171283	-0.20049	-0.126514	-0.135192
158540	-0.0647916	-0.0118014	-0.141479	-0.0260847	-0.0247049	0.0147835	0.0121495	-0.00462372	-0.00605318	-0.111101	-0.0102393	-0.0398582	-0.0523959	-0.0790912	-0.112447	-0.0303911	-0.00371158	-0.0447917	-0.0231796	-0.0387018	-0.0351353	0.00229032	-0.044031	-0.0594898	-0.0862502	-0.00277801	-0.047999	-0.0560977	-0.0582435	-0.0701084	-0.092188	-0.0704204	-0.0246285	0.0258652	-0.0284717	-0.0516373	-0.0517028	-0.0857186	-0.0112309	-0.0562327	-0.0454377	0.0115173	-0.056472	-0.0377103	-0.0289494	-0.00888911	-0.00357398	-0.000131224	0.0391585
158843	-0.132474	-0.0505488	-0.487073	-0.218195	-0.253293	-0.0300183	-0.0891972	0.200277	0.158877	-0.200158	-0.0772605	-0.0950669	-0.15474	-0.133654	-0.350489	-0.0804892	-0.250735	0.15972	-0.0717869	-0.00843524	0.0607959	0.0507312	-0.0342712	-0.114585	-0.356727	0.0935696	-0.247077	-0.294715	-0.082419	0.0236723	-0.05359	-0.207202	0.0512243	0.008022	0.0298849	-0.281703	-0.321306	-0.370945	-0.141273	-0.0896863	-0.0348711	-0.217653	-0.0523408	-0.263178	-0.425668	-0.234269	-0.0529585	0.0284116	-0.202228
159138	-0.0872143	-0.0410828	-0.10269	-0.083094	-0.0661799	-0.0295681	0.023702	-0.00537947	0.0282728	-0.154644	-0.112614	-0.0397945	-0.0431687	-0.0641966	-0.0602273	-0.0568197	-0.0395004	0.011855	-0.0203145	-0.0560885	0.00930469	0.0115981	0.00844112	-0.0106143	-0.107742	0.0291513	-0.096671	-0.0625144	0.0224712	-0.0130011	-0.0787603	0.00477921	-0.0367643	0.0165894	0.0241049	-0.0342587	-0.087768	-0.113878	-0.0177044	-0.0206304	0.022442	-0.0339739	-0.0613979	-0.0877155	-0.112767	-0.0591898	-0.0677214	-0.0572219	-0.010178
159239	-0.0764412	0.0870769	-0.150852	-0.114337	-0.0703127	-0.0758292	-0.0902079	0.0870628	0.138318	-0.113062	-0.0466645	-0.199853	-0.0854815	-0.0523752	-0.147857	-0.135992	-0.150176	-0.114569	-0.0882337	-0.0749115	0.0460084	-0.0738982	0.0968383	0.0821001	-0.128357	-0.0469373	-0.219484	-0.0994775	-0.201169	-0.137975	-0.0682444	-0.106841	-0.0639976	0.0341494	0.0311818	-0.201906	-0.247571	-0.266467	0.0651961	-0.00903106	0.0918191	-0.0503358	0.0163712	-0.151856	-0.212217	-0.2624	-0.00987685	-0.119539	-0.196915
159340	-0.0932464	-0.0193376	0.0111309	-0.014208	-0.0240346	-0.0684181	0.0858856	0.0317359	0.00583224	-0.114509	0.0988937	-0.0917635	-0.0255689	-0.199054	-0.128182	-0.0522223	0.0161533	-0.0671912	-0.0524712	-0.0755942	-0.118228	-0.0120794	0.00128029	0.0687151	-0.0456795	-0.16777	-0.044116	0.0171721	-0.148451	-0.120208	-0.0304532	-0.290417	-0.151589	-0.162717	-0.238765	-0.0559421	-0.0875043	-0.189008	0.0546653	-0.131974	0.0420754	-0.00217116	0.00670739	-0.130581	-0.0765528	-0.0212822	-0.0201264	0.0081511	-0.0368808
159441	-0.0155284	0.00498663	-0.0397234	-0.0290877	-0.0230161	0.0220975	-0.0076321	0.00850923	0.0362332	-0.0408193	-0.123731	-0.153181	-0.00368809	-0.0264076	-0.0876079	-0.0412602	-0.0204388	-0.0148901	0.00998719	0.0268697	-0.00512348	-0.0389227	-0.000370714	0.0524139	-0.118596	-0.0712278	-0.153437	-0.0508268	-0.0774915	-0.0267792	-0.0405246	-0.13513	-0.0032634	-0.0718953	-0.0964824	-0.077439	-0.141718	-0.176038	-0.0217507	-0.0636531	0.00301532	0.0124321	-0.0433141	-0.0877479	-0.141975	-0.0894256	0.00120082	-0.0201967	-0.00551145
159744	-0.0418565	-0.0238041	-0.14148	-0.071784	-0.0193313	-0.000363717	0.0178591	-0.0514772	-0.0583693	-0.0915852	-0.136632	-0.046841	-0.0646378	-0.150113	-0.224546	-0.0251503	-0.0921457	0.0786227	0.0196151	-0.0179221	0.0210491	0.021394	-0.00750865	-0.0503685	-0.0746894	0.0221348	-0.18211	0.0128255	-0.170769	-0.0617363	-0.170939	-0.130205	-0.0662833	-0.0430487	-0.079484	-0.0971497	-0.0931601	-0.177267	-0.162682	-0.101336	-0.0409211	-0.0823754	-0.0631426	-0.18982	-0.257626	-0.19576	-0.139914	-0.0126934	-0.107999
160123	-0.0222744	0.0126495	-0.0582971	-0.0122403	-0.0261756	-0.0132475	-0.0498356	-0.0934259	-0.115825	-0.0615156	0.0312649	-0.0488303	-0.0394649	-0.0488188	-0.100152	-0.0096893	-0.0397694	-0.0858778	-0.0104412	0.0109942	-0.103894	-0.0499612	-0.0748773	-0.0821953	-0.0806802	-0.0167045	-0.0862822	-0.119294	-0.0735648	-0.0677141	-0.0417285	-0.0894252	-0.0386112	-0.0107589	-0.0381367	-0.0724135	-0.0423376	-0.0405623	-0.0953065	-0.135105	-0.0498807	-0.105062	-0.0378049	-0.0709823	-0.0915088	-0.0294395	-0.0633604	0.0297711	-0.0277537
160729	-0.101518	-0.0790145	-0.17615	-0.0880506	-0.0930969	-0.110313	-0.0538918	0.0243525	-0.0194459	-0.254297	-0.26403	-0.304585	-0.177938	-0.0819282	-0.235842	-0.220308	-0.22064	-0.119114	-0.112171	-0.0840352	-0.07733	-0.153451	-0.116894	-0.081872	-0.26102	-0.109464	-0.18895	-0.156114	-0.0136398	0.0276618	-0.00905402	-0.2171	-0.0226159	-0.0972564	-0.172739	-0.177637	-0.127576	-0.215264	-0.0497075	-0.171646	-0.00759047	-0.224542	-0.0802418	-0.288448	-0.400058	-0.466741	-0.212374	-0.0205975	-0.341187
160830	-0.11241	0.0169604	-0.0890575	-0.0949309	-0.124198	-0.0289819	-0.0789278	0.0438737	0.0206803	-0.140729	-0.0865703	-0.0544701	-0.134977	-0.0457442	0.0254119	-0.0911391	-0.0348695	-0.0299801	-0.0818595	-0.0560112	-0.0139598	-0.0116135	0.0147211	0.00575322	-0.109916	-0.0314013	-0.0561343	-0.100359	0.0319413	0.0555644	-0.0529688	-0.0265359	0.0701112	0.0561999	0.0252321	-0.0115901	-0.094539	-0.117224	0.0303366	-0.0783909	-0.0483406	-0.0373297	-0.0794399	-0.121073	-0.132149	-0.0650706	-0.0609142	-0.0548205	-0.000261407
161327	-0.0539624	-0.0475981	-0.0996739	-0.070039	-0.0814971	-0.0864587	-0.0452118	-0.0277284	-0.0311551	-0.00189253	-0.0698456	-0.0458361	-0.053188	-0.0269346	-0.0771668	-0.0998114	-0.0767066	-0.0434924	-0.0495377	-0.0853798	-0.0143193	-0.0151489	-0.0980352	-0.00405263	-0.070308	-0.0713997	-0.0798244	-0.0592133	-0.0389418	-0.0301562	-0.0868593	0.0106291	0.00246983	0.0423508	-0.00418319	-0.00380187	0.022275	0.0179459	0.0211817	0.0190094	-0.00102397	-0.0524079	0.00692921	-0.0323492	-0.0824951	-0.0602332	-0.0355937	-0.0373658	-0.0610378
161630	-0.117103	0.0013662	-0.104217	-0.0810923	-0.0323105	0.0128116	-0.0359705	-0.0753074	-0.0793098	-0.178058	-0.080693	-0.263448	-0.11149	0.00173662	-0.0998961	-0.0550494	-0.0931695	-0.158602	-0.0634549	-0.0210053	-0.00596459	-0.0207002	-0.0618367	-0.094944	-0.209804	0.0429753	-0.0179727	-0.231147	-0.0176953	0.0920369	-0.0197825	-0.110236	0.0703589	-0.0318951	0.0127307	-0.237152	-0.139905	-0.0958458	-0.0240633	-0.141247	-0.0286573	-0.0600665	-0.118965	-0.246803	-0.223232	-0.217616	-0.202981	-0.142796	-0.210203
161731	-0.32737	0.00952281	-0.285567	-0.303658	-0.289769	-0.265976	-0.184812	0.0254538	-0.0210381	-0.519152	-0.181869	-0.257964	-0.242628	-0.0410619	0.154564	-0.239593	-0.158714	-0.297141	-0.237613	-0.21792	-0.0617762	-0.178198	-0.051123	-0.0299313	-0.206724	-0.139034	-0.192279	-0.186256	0.286905	0.274537	0.0566157	-0.109112	0.25132	0.153495	0.14004	-0.22674	-0.296836	-0.266499	-0.00219987	-0.212804	-0.108387	-0.172897	-0.279902	-0.311806	-0.399949	-0.395281	-0.209735	-0.200205	-0.173438
161832	0.0103249	-0.0143495	-0.0452158	0.00356287	-0.0291774	-0.0150041	0.0125762	0.0541766	0.0197679	-0.0501041	-0.0484749	0.0548904	0.00962271	-0.00976153	-0.0999106	-0.0448518	-0.0699017	-0.0199388	-0.0033309	-0.0091975	-0.0175544	-0.024817	0.00445486	-0.0208072	-0.0475819	0.0425551	-0.0835236	-0.0275364	-0.0660408	-0.0413882	-0.0587666	-0.0160534	0.0174785	-0.00382089	-0.0287775	0.0206479	-0.0952149	-0.0670772	0.0109131	-0.0159879	-0.0253237	-0.038054	0.0596957	-0.0450687	-0.0688265	-0.00167914	-0.0626108	-0.068629	-0.0354892
162026	0.091503	-0.130845	-0.170083	-0.0901811	-0.199387	-0.121425	-0.207772	-0.212577	-0.216465	-0.18274	-0.0945545	-0.18857	-0.178711	-0.0621835	0.002152	-0.14882	-0.118446	-0.166044	-0.148489	-0.082834	-0.125497	-0.218938	-0.164099	-0.11622	-0.180774	-0.052341	-0.119721	-0.112129	0.00648296	0.0178095	0.00068603	-0.0831106	0.0102355	-0.0707569	-0.107404	-0.154052	-0.0167527	-0.0969809	-0.164452	-0.200191	-0.0576944	-0.14807	-0.0453187	-0.123777	-0.055861	-0.117072	-0.273644	-0.146223	-0.135764
162228	-0.167938	-0.0676185	-0.111984	-0.160459	-0.166605	-0.198074	-0.135288	-0.0577208	-0.0565974	-0.28681	-0.179598	-0.253774	-0.126428	-0.10664	-0.284427	-0.170168	-0.195188	-0.210611	-0.135292	-0.185765	-0.196961	-0.215546	-0.087203	-0.0676857	-0.164171	-0.115916	-0.116923	-0.226252	-0.188927	-0.00762864	-0.0882652	-0.162212	-0.00687535	0.0500874	0.0530574	-0.0718889	-0.203967	-0.310093	-0.0433887	-0.166821	-0.0328554	0.0451333	-0.101211	-0.228191	-0.295726	-0.216674	-0.119173	-0.0984183	-0.0722479
162329	-0.0991002	-0.0701824	-0.136942	-0.0529298	-0.0781517	-0.0487771	-0.0943731	0.0251656	0.05248	-0.146324	-0.101135	-0.111076	-0.0327793	-0.0320284	-0.188197	-0.0405959	0.00990737	-0.0483108	-0.0344026	0.00454328	-0.0218614	0.00429913	0.0137078	-0.026699	-0.174531	-0.0148084	-0.00870828	-0.0670399	-0.000988071	-0.0407649	-0.0887127	-0.0686576	0.0224054	0.0520871	0.0206701	0.0220129	0.00883687	-0.0685977	0.0335425	-0.0231141	-0.0260252	-0.0310147	-0.0752805	-0.0610653	0.0152564	-0.0339967	0.0228197	-0.0342276	-0.014233
162733	-0.0191736	-0.0600439	-0.0871545	-0.0914043	-0.151302	-0.146557	-0.111407	-0.0447305	-0.0223869	-0.098514	-0.0724875	-0.263474	-0.089545	0.0148687	-0.0184012	-0.117058	-0.136953	-0.148371	-0.0952822	-0.14948	-0.127515	-0.167353	-0.0793218	-0.00905	-0.0509078	-0.0515666	-0.102184	-0.206051	-0.0793752	0.0224414	-0.0189804	-0.0455684	0.0626686	-0.0166252	-0.0437364	-0.108051	-0.0786335	-0.110186	-0.143718	-0.0823093	-0.02612	-0.0920909	-0.0674953	-0.138583	-0.138822	-0.110961	-0.199964	-0.121411	-0.107204
162935	-0.11175	0.030647	-0.184043	-0.0966512	-0.148153	-0.0848843	-0.109174	0.0520499	0.0272193	-0.190238	-0.0740576	-0.0837388	-0.0815203	-0.339887	-0.3404	-0.122639	-0.0798636	-0.0767128	-0.130696	-0.134931	-0.0918146	-0.168971	0.100942	0.0172978	-0.192601	-0.0639313	-0.247431	-0.138297	-0.232208	-0.116143	-0.205625	-0.305291	0.00986536	-0.172122	-0.189311	-0.215337	-0.296015	-0.364911	-0.0452077	-0.0883887	0.00342291	-0.120021	-0.00968605	-0.247781	-0.267767	-0.363714	-0.157262	-0.16954	-0.0889554
163129	-0.0872344	-0.0741083	-0.161151	-0.150215	-0.116443	-0.0672551	-0.0519417	-0.0714708	-0.0742877	-0.251207	-0.188903	-0.181259	-0.177303	-0.0633784	-0.0758196	-0.204648	-0.11194	-0.253226	-0.0554753	-0.140731	-0.100681	0.0224606	-0.123488	-0.0169666	-0.111217	0.0286588	-0.213926	-0.17449	-0.0899271	-0.0148844	-0.224067	-0.0298194	0.00813725	0.014286	-0.0733824	-0.104798	-0.0971748	-0.0433762	-0.0714244	-0.0237108	0.0180079	-0.116233	-0.0514928	-0.10269	-0.159581	-0.129928	-0.135568	-0.196008	-0.192971
163432	-0.10769	0.0344632	-0.198485	-0.144061	-0.180737	-0.155405	-0.0686694	-0.00182658	0.0698813	-0.16622	-0.144513	-0.225205	-0.0989585	-0.0145817	-0.1619	-0.140233	-0.151176	-0.117806	-0.0926228	-0.0862024	-0.128797	-0.119911	-0.0698237	-0.0302736	-0.185039	0.00539036	-0.145761	-0.222529	0.0150684	0.0758529	0.0927205	-0.221969	0.0777546	0.0374348	-0.03513	-0.0656594	-0.113692	-0.166125	-0.0241944	-0.0767472	-0.00867024	-0.00641945	-0.100926	-0.22457	-0.151476	-0.214816	-0.151647	-0.0213697	-0.114456
163836	-0.102636	-0.0517592	-0.185811	-0.173655	-0.112293	0.0036754	-0.159327	-0.0565053	-0.0592432	-0.161341	-0.144834	-0.191484	-0.115109	-0.0748649	-0.0712395	-0.20111	-0.0897559	-0.136918	-0.178553	-0.0835906	-0.0268369	-0.0518783	-0.130511	-0.0228194	-0.133976	-0.137915	-0.151345	-0.152408	-0.015263	0.0766629	-0.0700264	-0.0327077	-0.0240739	-0.0283776	-0.0626231	-0.119314	-0.068705	-0.105319	-0.0653773	-0.0476875	-0.00631168	-0.176953	-0.106179	-0.18733	-0.198429	-0.190491	-0.0880885	-0.175071	-0.18314
164030	0.0286481	0.0719658	-0.122176	-0.0264806	-0.000117367	0.0432918	-0.0605686	0.0991658	0.0669888	-0.232935	-0.310336	-0.364645	-0.0589069	-0.15089	-0.142449	-0.0927594	-0.204958	-0.124676	-0.0692755	0.0457926	0.0374202	0.0252006	0.0788921	-0.02664	-0.231128	0.00557875	-0.14588	-0.0576616	-0.328983	-0.037887	-0.0984221	-0.184989	-0.0413816	-0.0991075	-0.150725	-0.217975	-0.250308	-0.364195	-0.196823	0.0238014	0.0818989	-0.0237046	0.0820044	-0.211141	-0.295291	-0.358129	-0.273023	0.0126903	-0.411986
164131	-0.0217262	-0.0722191	-0.0385025	-0.0651913	-0.109407	-0.0708272	-0.125907	0.0115264	0.0275951	-0.0916752	-0.0420881	-0.0498762	0.023905	-0.0445281	-0.154232	-0.0662382	-0.0726652	-0.107639	-0.0551441	-0.108014	-0.0667306	-0.078598	-0.0320211	0.0436005	-0.124028	-0.144411	-0.130715	-0.16044	-0.177852	-0.0882439	-0.0383579	-0.0631192	-0.0216848	-0.0446633	-0.0891806	-0.0123557	-0.0390377	-0.0726941	0.0269962	-0.00659749	0.0324453	-0.00670939	-0.00917368	-0.138715	-0.0183825	-0.132863	-0.0293235	-0.0789163	-0.00411934
164636	-0.0314563	-0.120645	0.0208089	-0.0385454	-0.0817783	-0.0764687	0.00820763	-0.0559822	-0.0824131	-0.118499	0.00933265	-0.123166	0.0353023	0.0270713	0.0223306	-0.0415118	-0.0435725	-0.111622	-0.0757785	-0.0775274	-0.0900423	-0.0780148	-0.0722888	-0.00408916	-0.19222	-0.15652	-0.0384689	-0.0628039	-0.0236516	-0.128337	-0.0677988	-0.01979	-0.102995	-0.0627563	-0.0678774	0.00968236	0.198586	0.1692	-0.0044168	0.0241659	0.0248419	0.0383959	-0.102451	-0.0201038	0.13257	0.154028	-0.0170657	-0.0103345	0.0329924
164939	-0.161471	0.0972343	-0.114141	-0.150296	-0.150839	-0.0985301	-0.0311121	0.134069	0.108822	-0.17038	-0.187196	-0.0544703	-0.0821073	-0.0495041	-0.284791	-0.12936	-0.107064	0.00149108	-0.0603048	-0.0883939	-0.116114	-0.121325	0.0190297	0.0134017	-0.249239	-0.030043	-0.175701	0.0718594	-0.00896202	0.0681801	-0.0861317	-0.126055	0.0912348	0.0210184	-0.0550332	-0.111667	-0.217287	-0.285467	0.00497076	-0.0282779	0.0476094	-0.135099	-0.132913	-0.332339	-0.316911	-0.358771	-0.170451	-0.146207	-0.143236
165032	-0.105299	-0.00222565	-0.0623591	-0.140439	-0.152745	-0.0418522	-0.116276	0.112519	0.0771287	0.014138	-0.0591287	-0.0781541	-0.104444	0.0246069	-0.0683567	-0.107457	-0.0189987	-0.0297582	-0.0107248	-0.0416883	-0.0307307	-0.0292827	-0.0286463	-0.0637938	0.012026	-0.0131451	-0.142487	-0.0510869	-0.0732404	-0.0218372	-0.000264136	0.0223061	0.0138875	-0.00136426	-0.0229469	0.003723	-0.0936658	-0.110336	-0.0198878	-0.0568977	0.0249212	-0.0527677	0.0366017	-0.00900769	-0.140325	-0.127939	0.0201155	-0.0196419	-0.0465849
165436	-0.114552	-0.0302748	-0.426956	-0.138658	-0.160654	-0.154674	-0.0388803	0.0772131	0.0571331	-0.239163	-0.242371	-0.248746	-0.204432	-0.417172	-0.330156	-0.180428	-0.196481	-0.0903935	-0.252084	-0.117668	-0.112316	-0.124831	0.0140344	-0.0581349	-0.330531	0.0211434	-0.222173	-0.273821	-0.215617	-0.200372	-0.115339	-0.328176	-0.255073	-0.127702	-0.243926	-0.092926	-0.188781	-0.382276	0.00884419	-0.134861	-0.0194285	-0.11305	-0.0719542	-0.215807	-0.172183	-0.287443	-0.124462	-0.131512	-0.161232
165638	-0.133383	-0.0356809	-0.123263	-0.0868437	-0.116304	-0.101677	-0.0667472	0.059231	0.0251477	-0.0476708	-0.0380589	-0.0992867	-0.121605	-0.0167252	-0.113902	-0.11623	-0.0938495	-0.066676	-0.095978	-0.0680282	-0.108762	-0.136192	-0.082273	0.0175429	-0.0541399	-0.123711	-0.130271	-0.0317081	-0.0349463	-0.0274095	0.0301866	-0.0694761	0.0397263	-0.0177215	-0.0362754	-0.0233491	-0.0278637	-0.0487792	-0.0818298	0.0421789	0.029106	-0.193486	0.0107132	-0.0836129	-0.174471	-0.0910539	-0.14624	-0.0626072	-0.12182
165840	-0.0103586	-0.0215391	-0.0235922	0.0328205	0.098772	0.0515553	0.0475104	-0.0644589	-0.0850852	-0.0867319	-0.0810153	-0.11523	0.00658424	0.0344213	-0.00937494	-0.0261954	-0.0303401	-0.0310458	-0.000384196	-0.0138206	-0.0487396	0.0124071	-0.0809192	0.0362122	-0.0396108	-0.0248995	0.00981241	-0.0655185	-0.055532	-0.00673016	-0.0247039	0.0261974	0.0186433	0.0135048	0.0131526	-0.0196408	0.0261442	-0.0153493	0.0368161	-0.0123736	-0.0397349	-0.0412736	-0.00289229	-0.0472788	-0.0187087	0.00772679	-0.0590633	-0.0463884	-0.0265202
165941	-0.109202	-0.0591299	-0.0921833	-0.0746849	-0.119325	-0.0908669	-0.102965	-0.0626776	-0.0570653	-0.220801	-0.0471437	-0.155319	-0.0875244	-0.00560797	-0.063627	-0.0941831	-0.083654	-0.102247	-0.078052	-0.0540187	-0.0816263	-0.0606283	-0.0875699	-0.101823	-0.220726	-0.0295707	0.00700958	-0.253599	-0.0436995	0.0477235	0.0630755	-0.0280291	0.101404	-0.00447941	-0.0220439	-0.0436986	-0.152572	-0.140974	-0.0330042	-0.0572347	-0.0662667	-0.0889307	-0.0424473	-0.12833	-0.143899	-0.153479	-0.121792	-0.10339	-0.10843
166438	-0.131507	-0.173332	-0.115536	-0.194346	-0.180576	-0.119802	-0.0950492	-0.193537	-0.209142	-0.018901	-0.0755535	-0.113556	-0.105713	0.00052871	0.0661121	-0.0456315	-0.0514561	-0.178316	-0.0534061	-0.109487	-0.111848	-0.189185	-0.207889	-0.0211742	-0.134276	-0.0199198	-0.0908369	-0.141411	0.0536101	-0.0513936	-0.192579	0.132212	-0.0789663	0.0227103	-0.0572119	-0.0934973	-0.0735369	-0.00665996	-0.152412	-0.135495	-0.100866	-0.0838247	-0.0592264	-0.136089	-0.0230189	0.102392	-0.16158	-0.111159	-0.0653381
166640	0.0198191	-0.0116608	-0.180673	0.0116567	0.00166168	-0.0200156	-0.00999113	0.00580175	-0.000798175	-0.0425503	-0.0959653	-0.0613181	-0.0173866	-0.0601171	-0.126171	-0.0448097	-0.0729292	-0.0181213	-0.026833	-0.0352041	0.0027705	-0.0489082	-0.017841	-0.0329358	-0.140714	-0.053863	-0.0449716	0.0102722	-0.0488549	0.0475832	-0.0158524	-0.0525669	0.0657722	-0.0240083	-0.053561	-0.0740496	-0.0844125	-0.0921529	0.00991019	-0.0267294	0.00431915	0.00419239	-0.0757458	-0.0953698	-0.0636909	-0.0956452	-0.0681896	-0.00186545	-0.00604806
167036	-0.0288662	-0.0058155	-0.162875	-0.000408864	-0.0219905	-0.0497339	0.0150695	0.107479	0.0456615	-0.0885421	-0.146159	-0.0358824	-0.0134904	-0.217832	-0.245725	-0.038132	0.0771785	0.14051	-0.0443466	-0.0149674	0.00682688	-0.0388276	0.0955912	-0.0288129	-0.231689	-0.263378	-0.369421	-0.301251	-0.125226	-0.0726072	-0.158648	-0.18051	0.0103986	0.0564975	-0.193845	-0.30615	-0.299376	-0.358012	-0.116391	-0.111296	0.0583585	0.0374659	-0.0414352	-0.21735	-0.281723	-0.102095	-0.156825	-0.0416171	0.0506502
167238	0.0798823	0.0832785	-0.190004	0.0957091	0.133326	0.129922	0.219059	0.145241	0.179237	-0.363224	-0.024743	-0.0739021	0.0234551	-0.199671	-0.390757	0.115764	-0.00805635	0.187727	0.0769603	0.195961	0.151679	0.089458	0.184797	0.0200941	-0.244129	-0.0326282	-0.278333	-0.286935	-0.114682	0.0583261	-0.12193	-0.342331	-0.054572	-0.0904612	-0.291739	-0.266252	-0.131814	-0.322362	-0.0765936	-0.00926201	0.0195117	0.0748823	-0.146127	-0.563279	-0.31045	-0.351319	-0.172957	0.050081	0.108196
167440	-0.166312	-0.0559974	-0.132328	-0.112032	-0.0959597	-0.0581993	-0.112117	0.0445756	0.0527583	-0.121419	-0.206406	-0.163404	-0.0659923	-0.207832	-0.330889	-0.107194	-0.172828	-0.0091076	0.00433915	0.0413973	-0.0332462	-0.0152247	0.0784527	-0.0556821	-0.276713	-0.111182	-0.239192	-0.1779	-0.300115	-0.0978071	-0.151822	-0.416978	0.0330861	-0.215041	-0.313313	-0.139905	-0.203436	-0.463167	-0.117652	-0.0493004	0.0882647	-0.0566361	-0.052858	-0.0554435	-0.250224	-0.228747	-0.17591	-0.130057	-0.112049
167743	-0.0278659	-0.121035	-0.079033	-0.0624065	-0.103293	-0.080655	-0.137546	-0.109572	-0.0653461	-0.157268	-0.0930214	-0.129972	-0.0644189	0.0327454	0.000775395	-0.0984667	-0.127065	-0.14485	-0.0550194	-0.0689448	-0.0667799	-0.0550971	-0.103129	-0.0254576	-0.0933914	-0.284739	-0.0242983	-0.0214143	-0.114247	-0.00596332	0.0352335	0.0268095	-0.00249213	0.0102725	-0.0114599	-0.143406	-0.0857462	-0.0695528	-0.0630381	-0.0928027	-0.0534164	-0.104496	-0.180705	-0.107448	-0.127105	-0.0975165	-0.119905	-0.0713888	-0.149783
168139	-0.187252	-0.04632	-0.207804	-0.19679	-0.148316	-0.113205	-0.106225	-0.0278239	0.0359837	-0.329982	-0.0832619	-0.257611	-0.133788	-0.132081	-0.236277	-0.123382	-0.0648843	-0.0311865	-0.0349281	-0.00958451	-0.046159	0.0104547	0.0250096	-0.0461416	-0.161067	0.0230364	-0.182304	-0.0746156	-0.339398	-0.0510226	-0.162046	-0.126865	0.0437811	0.049253	-0.0482618	0.00909121	-0.114684	-0.159131	0.000904695	-0.0600218	-0.0618682	-0.0757637	-0.104398	-0.206092	-0.166496	-0.0642086	-0.0790785	-0.135519	0.00239827
168240	-0.150866	-0.101917	-0.277593	-0.243109	-0.213811	-0.194581	-0.108791	0.016726	0.0675742	-0.295939	-0.158317	-0.375159	-0.219716	-0.0956825	-0.244315	-0.306654	-0.373221	-0.304728	-0.144533	-0.134089	-0.164292	-0.247276	-0.117613	-0.0647065	-0.350158	-0.0795009	-0.22881	-0.186172	0.117252	0.18464	0.0379107	-0.0572956	0.173697	-0.0850788	-0.00135225	-0.113473	-0.106632	-0.207848	0.0690808	-0.0855096	-0.0135985	-0.192072	-0.18781	-0.432586	-0.291291	-0.335042	-0.252301	-0.269226	-0.201264
168341	-0.0338002	-0.124429	-0.0484572	-0.0281667	-0.0871071	-0.0763805	-0.0975078	0.115068	0.0761387	-0.0601743	-0.04336	-0.0438608	-0.138721	0.0165357	-0.0928907	-0.193391	-0.0663495	-0.145951	-0.167778	-0.071513	-0.1063	-0.0850943	-0.145297	0.0946234	-0.116447	0.0186885	-0.135358	-0.181955	-0.102135	-0.0574628	-0.0286342	-0.0241775	-0.0150446	0.0133663	-0.0369775	0.107398	0.00114786	-0.0242078	0.0903687	0.0907132	0.0581202	-0.00529639	0.0929007	-0.0848611	-0.161437	-0.0873251	-0.102182	-0.0498584	-0.0437228
168745	-0.116643	-0.0735304	-0.152041	-0.0790043	-0.114649	-0.071586	0.0912154	-0.086741	-0.054657	-0.27045	-0.254644	-0.367229	-0.0946286	-0.0310329	-0.179554	-0.120247	-0.141918	0.0460483	-0.0976358	-0.15297	-0.0224567	-0.112128	-0.0815995	-0.0253791	-0.427798	-0.232806	-0.203198	-0.305794	-0.127588	-0.0211836	0.00789038	-0.0298006	-0.0137824	0.0188115	-0.0257798	-0.0665878	-0.133572	-0.0647553	-0.0658577	0.0967946	0.0180587	-0.136852	-0.063691	-0.14117	-0.113445	-0.138663	0.0140526	-0.0047327	-0.113142
168947	0.041212	0.016433	-0.256622	-0.0236794	-0.0751489	-0.100369	-0.0430202	0.107371	0.0972828	-0.308411	-0.0489806	-0.019429	-0.00411484	-0.105994	-0.327637	-0.0668474	0.039346	-0.0235088	-0.0754056	0.0118964	-0.0311517	-0.0664571	-0.0281783	-0.0224045	-0.196875	-0.229007	-0.223819	-0.320172	-0.155855	-0.263773	-0.120203	-0.1453	-0.136767	-0.083323	-0.223659	-0.0202666	-0.017238	-0.126624	0.0300876	0.0400514	0.101911	0.0713565	0.120508	-0.0985129	-0.198222	-0.165566	0.0992399	0.0705436	0.0108867
169343	0.0499758	-0.00355712	0.0612986	0.0310699	0.064961	0.0660375	0.0460329	-0.0187165	-0.00390667	0.109228	0.0376565	0.0436297	0.0635309	-0.0956967	-0.168276	0.039406	0.000644683	-0.0153002	0.0473668	0.0497989	0.0323499	0.00307924	0.00458392	0.00230186	0.0487268	-0.13671	-0.00813383	0.0220209	0.0113228	-0.149074	-0.103533	-0.054662	-0.0629031	-0.116434	-0.110934	-0.0090596	-0.00746593	0.0169581	0.0421139	-0.0301102	-1.85617e-07	0.00406277	-0.00622283	-0.0419812	-0.0210364	0.0326227	-0.0295123	-0.00749146	0.0113061
169444	-0.00049229	0.0288194	-0.108034	0.013604	0.0429838	0.0315746	0.0540918	0.00593408	0.0425961	-0.0421674	-0.0960359	-0.164647	0.012823	-0.148337	-0.211357	0.0346145	-0.0406066	-0.0195067	-0.0148247	0.0184109	-0.0115022	-0.0123889	-0.000462475	-0.0301404	-0.0358006	-0.0424863	-0.2578	-0.0654698	-0.127479	-0.1312	-0.123801	-0.141865	-0.14251	-0.103889	-0.15803	0.018994	-0.00469904	-0.0839704	0.0620637	-0.000467757	-0.00356064	0.0515033	0.0294473	-0.0728394	-0.008749	-0.109136	-0.0341314	0.0461224	0.0477625
169545	-0.0543461	-0.0789096	-0.262739	-0.136596	-0.106524	-0.00175354	-0.0805111	0.118102	0.0502717	-0.317798	-0.199236	-0.295599	-0.160764	0.0296282	-0.194203	-0.24212	-0.189683	-0.132713	-0.179335	-0.196272	-0.107234	0.0286529	0.00327706	0.0330538	-0.259842	-0.220556	-0.301245	-0.117747	-0.182614	0.106122	-0.031895	-0.120739	0.130667	0.237516	0.0933288	-0.142155	-0.157888	-0.208501	0.00688982	-0.204996	0.0386903	-0.253963	-0.151045	-0.185773	-0.154505	-0.173286	-0.251783	-0.228085	-0.251854
169949	-0.140342	-0.105637	-0.133451	-0.185365	-0.197627	-0.157944	-0.152115	0.00185	0.0218709	-0.335866	-0.119316	-0.264166	-0.149772	0.0216924	-0.0904222	-0.189145	-0.191944	-0.109234	-0.141159	-0.142149	-0.0744371	-0.0936472	-0.0876783	0.0360695	-0.122139	-0.0446138	-0.176033	0.0105869	-0.153489	0.0762576	0.00172781	0.00668367	0.0481282	0.0238866	-0.0571592	-0.0837791	-0.0880328	-0.149238	-0.0776413	-0.037353	0.0544489	-0.159787	-0.173053	-0.189157	-0.22829	-0.208515	-0.15411	-0.183922	-0.121985
170631	-0.118872	0.00953049	-0.121584	-0.150174	-0.110538	-0.0976169	-0.0736447	0.0170899	0.0099769	-0.187009	-0.0446041	-0.135874	-0.116477	-0.0695893	-0.160154	-0.0611715	-0.0759929	-0.0187653	-0.04658	-0.0577794	-0.123147	-0.0733081	0.00573221	-0.0747002	-0.0631103	-0.0730703	-0.110285	-0.0938521	-0.180218	0.0395009	0.0405179	-0.0864318	0.0801054	0.016904	-0.0151835	-0.156641	-0.133079	-0.121962	-0.00224731	-0.0441921	0.0382459	-0.0589407	-0.156745	-0.143044	-0.145187	-0.198155	-0.153629	-0.00346551	-0.0589127
171330	-0.162546	-0.0652232	-0.217857	-0.157453	-0.202612	-0.101856	-0.0936541	0.0584521	0.0441234	-0.151874	-0.155293	-0.180902	-0.153793	0.0115354	-0.0983751	-0.11703	-0.107916	-0.147888	-0.0820901	-0.0878072	-0.0853384	-0.132207	-0.0404737	-0.0241059	-0.110378	-0.00398135	-0.0732791	-0.119792	-0.0168589	0.0857516	0.0390648	-0.0406574	0.0887761	0.0605302	0.0565248	-0.0543438	-0.170545	-0.227197	0.0275756	-0.0554513	0.00176359	-0.104033	-0.124367	-0.140136	-0.168475	-0.223927	-0.0894562	-0.08495	-0.0911195
171532	-0.0536086	-0.0617839	-0.0571037	-0.077488	-0.0485807	0.0029602	-0.0571145	0.00646787	-0.00254213	0.00720487	-0.105016	0.0119888	-0.00351318	-0.0486526	-0.0136253	-0.0444509	-0.0129357	-0.0353648	-0.0415798	-0.0373558	-0.024254	-0.0430849	-0.0272716	-0.0284745	-0.164669	0.0613529	-0.0653763	-0.0775509	-0.0676967	-0.0178779	-0.014391	-0.0617204	-0.0089195	-0.0325077	-0.0253908	-0.0509825	-0.0597071	-0.0616366	0.0692702	-0.0355649	0.0034472	0.00225649	-0.0680788	-0.104167	-0.0423207	-0.0701733	-0.108543	-0.0604866	0.0175105
171633	-0.0650881	-0.055234	-0.167706	-0.0660215	-0.0996652	-0.183658	-0.0500415	0.125687	0.0977201	-0.0931686	-0.210601	-0.265346	-0.0886529	0.0159162	-0.299865	-0.122686	-0.119044	-0.16822	-0.127074	-0.116297	-0.107568	-0.10108	-0.0104301	-0.0485397	-0.161301	-0.087984	-0.20477	-0.159119	-0.213777	-0.0765574	0.0658548	-0.0210419	0.0598852	-0.129441	-0.134228	0.0516882	-0.0220809	-0.10407	0.000461978	0.0778578	0.0788039	-0.0603413	0.0190776	-0.154413	-0.155554	-0.1705	-0.0950705	-0.141694	-0.0716236
172029	0.0410392	-0.0606965	0.0240477	-0.023788	-0.0663511	-0.107589	-0.0573214	0.14262	0.155713	-0.159151	-0.0318397	-0.255273	-0.0267943	-0.152546	-0.0910286	-0.042766	-0.0296465	-0.137418	-0.0863007	-0.0151725	-0.105206	-0.136559	-0.105686	0.121635	-0.224228	-0.133006	-0.198511	-0.167767	-0.13884	-0.0898184	-0.0307657	-0.234287	-0.0874493	-0.12259	-0.167898	0.0712779	0.035385	-0.0692435	0.116464	0.0111408	0.125772	0.0492709	0.0201568	-0.281412	-0.0312436	-0.0537563	-0.0218569	0.00751066	0.0173602
172130	-0.0753929	-0.0372723	-0.172693	-0.246072	-0.155414	-0.0989307	-0.0890799	0.0461668	0.0369243	-0.0733126	-0.071681	-0.05275	-0.138228	-0.100785	-0.174178	-0.124439	-0.101821	-0.0924338	-0.0928303	-0.105538	-0.0816643	-0.116549	-0.065165	0.000173124	-0.137436	-0.199649	-0.185611	-0.0695159	-0.115088	-0.0427099	-0.0592163	-0.0877648	-0.0429471	-0.0479546	-0.081027	0.00131312	-0.0499989	-0.0777173	0.0203762	0.00153334	0.0613456	-0.034365	-0.0406747	-0.0319426	0.0084635	-0.0953549	0.0320329	0.00580531	-0.0253673
172332	0.0576981	-0.0656311	-0.157435	-0.00391687	-0.0429551	-0.0567909	0.0273028	-0.154908	-0.178386	0.14774	0.0506076	0.0432041	-0.0983177	-0.0667678	-0.221249	-0.0498737	-0.026493	0.00948614	0.0412739	0.0268994	-0.074155	-0.069715	0.0239958	-0.0207257	0.0672454	-0.240687	-0.114097	-0.0480176	-0.115439	-0.185366	-0.139312	-0.159056	-0.144748	-0.124076	-0.214432	-0.0316564	0.131173	-0.0474499	-0.00153646	-0.0324869	-0.00937777	-0.0270833	0.0834053	-0.0138919	-0.00677958	-0.0500125	-0.0913629	0.0171864	0.0129916
172433	-0.072864	-0.0723545	-0.150356	-0.137955	-0.116348	-0.065336	-0.122895	-0.0041063	0.0129939	-0.0702589	0.0170819	-0.0785976	-0.116924	-0.0454811	-0.0606741	-0.138332	-0.110208	-0.11494	-0.108276	-0.0964018	-0.0321718	0.0129206	-0.0657995	0.0352464	-0.112593	-0.025433	-0.0662759	-0.0737252	0.0304768	-0.0303397	-0.0637035	-0.0424319	-0.0155233	0.00452208	-0.0377279	-0.0455914	-0.0772741	-0.0665479	-0.0391822	0.0275293	-0.0431834	-0.0414693	-0.0318095	-0.0183798	-0.0795468	-0.0422133	-0.0191509	-0.0136025	-0.0771541
172534	-0.0392483	0.0438602	-0.116241	-0.0528185	-0.0116346	-0.0387273	0.045524	0.0586544	0.061545	-0.148144	-0.0327057	-0.204613	-0.0608219	-0.0764753	-0.140641	-0.0512833	-0.103769	-0.0188601	-0.0779167	-0.0195651	-0.0243023	-0.137976	-0.02149	0.0498505	-0.117601	0.0102444	-0.143045	-0.0882971	-0.1635	-0.0377513	-0.000556962	-0.0556658	0.0403673	-0.00159648	-0.0305527	-0.0942785	-0.0751185	-0.046422	-0.0847401	0.0354431	-0.00450043	-0.0581305	-0.0126381	-0.198768	-0.130881	-0.159549	-0.0788301	-0.0848208	-0.0733833
172938	-0.0531548	-0.102313	-0.0493152	-0.0561958	-0.10609	-0.130733	0.00749394	0.0127344	-0.013279	-0.0560525	-0.00138412	-0.0255294	-0.0605264	-0.112909	-0.132619	-0.0910597	0.00285276	-0.0655195	-0.0625881	-0.0973504	-0.123681	-0.118894	-0.110272	-0.0301166	-0.12659	-0.0140953	-0.192419	-0.312319	-0.0945149	-0.141727	-0.0790914	-0.161695	-0.0405643	-0.0939733	-0.186715	-0.0280565	-0.0265308	-0.0436872	0.0300631	0.000837399	-0.0231	-0.00496826	0.0864651	0.036188	0.036021	-0.0823936	-0.0110163	0.0159668	0.0287336
173334	0.0130679	-0.0260418	0.0833588	-0.00488468	-0.0222875	-0.0314378	-0.0360387	0.027824	0.0335421	-0.145465	-0.112806	-0.185443	0.0239168	-0.00365775	-0.0266778	0.0126797	0.0388851	-0.0681507	0.0248876	-0.054985	-0.0197597	-0.0411835	-0.0165434	-0.0379012	-0.048654	-0.162238	-0.0108232	-0.021374	-0.0890495	-0.0608919	0.0647344	-0.0395696	0.0263603	-0.0244993	-0.0529633	0.0959211	-0.0163825	-0.093413	0.0828583	0.0531681	0.050038	0.0115796	-0.0163029	-0.114484	0.0355784	-0.0580157	-0.0258212	-0.0698107	0.0229344
173435	-0.108564	-0.106179	-0.185499	-0.107463	-0.161918	-0.0812816	-0.095284	0.00376006	-0.00332024	-0.283795	0.0619224	-0.0526388	-0.14787	-0.0909171	-0.323875	-0.160684	-0.107156	-0.0831641	-0.109898	-0.146716	-0.0502486	0.00403249	-0.218303	-0.0304691	-0.29971	-0.112583	-0.457031	-0.0729876	-0.336724	-0.125219	-0.0565111	-0.288929	-0.000874619	0.00195165	-0.242463	-0.228137	-0.383826	-0.442348	-0.0150672	-0.119023	-0.0875411	-0.068786	-0.208173	-0.202233	-0.19452	-0.249992	-0.0462767	0.0652713	-0.164435
173536	-0.0282617	-0.0304753	-0.0735694	-0.0768167	-0.107446	-0.0791119	-0.0195642	0.0382521	0.0599912	-0.311212	-0.0730027	-0.148867	-0.0648206	-0.0981365	-0.1565	-0.0958593	-0.0212406	-0.118771	-0.0518426	-0.0580151	-0.0452589	-0.0714567	-0.0275366	0.0281201	-0.302469	-0.111744	-0.27418	-0.233038	-0.0656321	-0.0973182	-0.0364608	-0.134485	-0.0263714	-0.0884604	-0.169668	-0.170809	-0.199107	-0.208529	-0.0301784	0.00643433	0.101018	-0.050694	0.0508343	-0.151286	-0.150201	-0.0602645	-0.0817679	-0.131801	0.000871127
173637	-0.0277188	0.022292	0.0550969	-0.0338313	0.00632114	-0.0153106	-0.0298434	0.0805554	0.0718516	-0.182685	-0.0754819	-0.0749903	0.0224587	0.026365	-0.0570625	-0.0601545	-0.0976479	-0.0238956	-0.00223873	-0.00720144	0.00181181	-0.0317341	0.0427857	0.0793468	-0.0679635	-0.0179579	-0.0472989	-0.123158	-0.0678424	0.029283	0.0441344	0.00732893	0.0194439	-0.000531621	-0.0858931	0.0420022	0.0844227	0.0108574	-0.0245797	0.0551142	0.0361905	0.00452009	-0.1197	-0.0871222	-0.0963687	-0.13206	-0.212216	-0.142921	-0.0925379
173738	-0.107089	0.0353341	-0.0704662	-0.110873	-0.118455	-0.0528205	-0.0782165	0.0235072	0.0666178	-0.0874709	-0.121211	-0.137188	-0.103255	-0.0957549	-0.1661	-0.0722238	-0.0170768	0.0143743	-0.0143464	-0.0533019	-0.0373821	-0.00805353	0.0336738	-0.0187691	-0.257047	-0.0744965	-0.153111	-0.200994	-0.036332	-0.0018845	-0.124834	-0.158183	0.0170851	0.0391116	-0.0489164	-0.0281671	-0.195808	-0.265001	-0.0433053	-0.0849618	-0.00198505	-0.0307144	-0.0541121	-0.0536693	-0.0972422	-0.034948	0.043805	0.0572777	-0.0346372
173839	-0.0940045	-0.024192	-0.16133	-0.11155	-0.108261	-0.0435688	-0.0647399	0.00476473	-0.00590992	-0.159677	-0.0638762	-0.0820158	-0.109128	-0.0226949	-0.0762062	-0.0700061	-0.0428274	-0.07228	-0.048303	-0.0441809	-0.0215904	-0.0330037	-0.0145468	-0.036571	-0.102207	-0.0684553	0.0002148	-0.0249989	0.00856584	0.0821139	-0.035414	-0.0429509	0.0785605	0.0506303	0.0950525	0.00465272	-0.0950612	-0.13268	-0.0454456	-0.0817804	-0.0194409	-0.0540002	-0.0723397	-0.144135	-0.0629265	-0.0899578	-0.126539	-0.0875731	-0.0579295
173940	-0.0725264	-0.0440055	-0.206085	-0.0821254	-0.038761	-0.0204626	-0.0412558	-0.0121855	0.0397536	-0.278743	-0.393429	-0.259105	-0.0912409	-0.156943	-0.334239	-0.101921	-5.5202e-05	0.00985868	-0.101723	0.0652526	0.0172447	0.0461625	0.00833084	-0.0848021	-0.13699	-0.0253241	-0.345939	-0.226227	-0.318554	-0.146364	-0.185124	-0.324408	-0.0374251	-0.0714555	-0.214301	-0.336471	-0.25398	-0.360807	-0.144653	0.00868756	-0.033595	-0.0757384	-0.176614	-0.248059	-0.318745	-0.161662	-0.192327	-0.0561622	-0.196829
174437	-0.0467887	-0.0658929	-0.150929	-0.0103076	-0.0265931	-0.0222892	-0.0851377	-0.0850254	-0.0702806	-0.140678	-0.0994955	-0.0925795	-0.0407444	-0.00596106	-0.0656028	-0.0718318	-0.0307621	-0.071521	-0.0915494	-0.0680884	-0.0767538	-0.06715	-0.103269	-0.0534107	-0.147237	0.000763057	-0.0153079	-0.169981	-0.0226718	0.0079935	-0.0728993	0.00354544	0.0170199	0.00105797	-0.0439614	-0.0911746	-0.0707763	-0.0812268	-0.0726059	-0.0518355	-0.0480553	-0.066582	-0.0959086	-0.107008	-0.0572755	-0.0457128	-0.153015	-0.0841099	-0.0510153
174841	-0.0236427	0.0604294	-0.0701627	-0.0716709	-0.0838204	-0.122937	-0.0758581	0.0556918	0.130285	-0.238697	-0.441008	-0.521857	-0.076138	0.130145	-0.139473	-0.104552	-0.0384118	-0.215466	-0.0856185	-0.066112	-0.0883356	-0.13088	-0.0307207	0.00856372	-0.380078	0.0561954	0.0148407	-0.228304	-0.119789	0.202354	-0.0334947	-0.083155	0.172883	0.0361907	0.0725646	-0.118307	-0.30708	-0.221734	-0.131145	-0.102849	0.0220579	-0.065083	-0.167989	-0.335455	-0.255244	-0.312131	-0.266754	-0.256565	-0.0765256
175035	-0.036792	-0.0265061	-0.0989666	-0.0840418	-0.0675983	-0.0395417	-0.0351684	-0.0224623	-0.0297964	-0.046856	-0.0108961	-0.00712315	-0.0415479	-0.0207522	-0.104549	-0.0633557	-0.0242223	-0.0418263	-0.0463238	-0.0135005	-0.0288164	-0.0285366	-0.0352068	-0.0396652	-0.0959374	-0.00973686	-0.0954245	-0.0719292	-0.0555131	-0.0259851	-0.0688071	-0.0227777	0.00695629	0.0558834	-0.0261799	-0.0416934	-0.105497	-0.0937957	-0.0100931	-0.0133299	0.0304457	-0.0251998	0.00649947	-0.0590855	-0.0864646	-0.0969735	-0.0584784	-0.0155777	-0.0268762
175136	-0.130086	-0.0598223	-0.206725	-0.186766	-0.203987	-0.191495	-0.0921182	-0.0551766	-0.0864672	-0.312802	-0.162239	-0.0947466	-0.177835	0.0348754	0.0140137	-0.244135	-0.258899	-0.227085	-0.185271	-0.191456	-0.11508	-0.138309	-0.0266951	-0.0202163	-0.0614794	-0.0643852	-0.0664355	0.00298863	0.0408422	0.0842715	0.0976718	-0.0602381	0.0801508	-0.0290849	-0.0179535	-0.177794	-0.111979	-0.10231	0.0547346	-0.0798166	0.00891731	-0.0335637	-0.0998841	-0.36167	-0.157622	-0.269579	-0.144269	-0.106563	-0.118981
175237	-0.0579991	-0.105276	-0.152165	-0.13562	-0.147241	-0.16451	-0.139479	-0.0214037	0.0240137	-0.225617	-0.168121	-0.159801	-0.111988	0.109033	-0.0375955	-0.157486	-0.0252879	-0.237135	-0.110032	-0.162112	-0.164279	-0.135123	-0.0997631	-0.0606285	-0.376519	-0.12978	-0.0991531	-0.217839	-0.0756026	-0.0611086	0.0788969	-0.0962652	0.0139632	0.0785461	0.0180766	-0.0535957	-0.196605	-0.183539	0.0406017	-0.134345	-0.0910095	0.0622437	-0.202661	-0.116565	-0.175269	-0.00389981	-0.0806006	-0.0506529	-0.0239776
175338	-0.0696682	0.0290991	-0.0856261	-0.0867188	-0.1115	-0.129693	-0.12697	-0.0267873	-0.00208655	-0.174017	-0.10649	-0.271905	-0.0769446	-0.180613	-0.206464	-0.0701536	-0.15096	-0.165582	0.00580193	-0.127168	-0.155577	-0.229095	-0.120507	0.0206897	-0.146331	-0.10561	-0.126104	-0.0691755	-0.153224	0.0388738	-0.104098	-0.23122	-0.0190103	-0.0609157	-0.0976295	-0.176534	-0.141549	-0.291329	-0.141165	-0.0493226	-0.0352521	-0.0905025	-0.0487434	-0.288064	-0.188084	-0.0664767	-0.0927351	-0.22576	-0.024188
175439	-0.172153	-0.0537966	0.0271458	-0.239212	-0.21257	-0.102207	-0.143253	0.00342213	0.0663857	-0.174034	-0.0535851	-0.217118	-0.185076	-0.0504333	-0.0248348	-0.202915	-0.0391542	-0.135123	-0.168423	-0.101752	-0.0557275	-0.194433	-0.0421514	0.0845307	-0.183602	-0.245567	0.00122406	-0.217772	-0.058102	0.0754243	0.117148	-0.046543	0.150036	-0.00721145	0.0466275	-0.0265332	-0.048471	-0.0641084	-0.0344474	0.0794726	0.0219744	-0.0838541	-0.124919	-0.0509664	-0.21917	-0.144407	-0.159331	-0.0714646	-0.159092
175540	-0.0280955	-0.0283487	-0.100083	-0.0150087	-0.030555	0.0049823	-0.0737505	-0.00409249	-0.0123899	-0.105397	-0.0869511	-0.122507	-0.0686327	0.00507098	-0.0682991	-0.0554366	-0.0372887	-0.0750733	-0.0424274	-0.00596902	-0.014131	-0.0391232	-0.0546004	0.0363313	-0.0723609	-0.0281582	-0.0514723	-0.0630363	-0.0340921	0.0292741	-0.0199329	-0.027844	0.0402888	0.0294068	-0.00477916	0.0247603	-0.0484377	-0.0908147	0.0528536	0.00791786	-0.0186486	0.00398917	-0.0545178	-0.0505659	-0.139612	-0.0629763	-0.0504044	-0.0903551	-0.0413929
175742	-0.146389	-0.0216812	-0.283478	-0.181905	-0.110477	-0.0604345	-0.0440497	0.140258	0.231737	-0.291831	-0.177233	-0.213896	-0.0597599	-0.0262505	-0.39251	-0.109359	-0.121475	-0.0579103	-0.0808378	-0.101277	0.0251813	-0.0118527	0.0834577	-0.0487756	-0.251483	-0.0330528	-0.161822	-0.181218	-0.212397	0.0505607	-0.15437	-0.0941736	0.0413897	0.0422384	0.0573342	0.0186654	-0.143937	-0.147706	0.0571066	0.0238645	-0.0131988	0.0336029	-0.0809216	-0.329369	-0.141964	-0.123807	-0.094608	0.0572997	0.0613105
176037	-0.141709	0.0471815	-0.212024	-0.0491225	-0.0464771	-0.00446053	0.0556224	-0.0563959	-0.0201397	-0.219607	-0.171126	-0.115863	-0.088534	-0.211868	-0.378167	-0.101387	-0.139481	0.0502744	0.0614793	-0.0576944	0.0648455	0.0346231	0.0972076	-0.0099944	-0.321537	-0.321937	-0.362207	-0.287297	-0.346565	-0.122369	-0.130577	-0.131005	-0.11341	-0.0475056	-0.0750079	-0.17771	-0.283164	-0.344611	-0.0264335	-0.309861	-0.0263482	-0.0472537	-0.179175	-0.373661	-0.275442	-0.380048	-0.176518	-0.143224	-0.046038
176239	-0.0914774	-0.0933315	-0.0498588	-0.0872314	-0.0744608	-0.0342905	-0.0713138	-0.0631217	-0.066953	-0.117596	0.0132257	-0.0424069	-0.0612875	-0.0463422	-0.0701677	-0.0918475	-0.0730003	-0.0288229	-0.084729	-0.089199	-0.0852124	-0.0419216	-0.0421286	-0.0261199	-0.0682487	-0.00589938	-0.0566645	-0.0425644	-0.0631371	-0.0863882	-0.0692496	-0.047081	-0.0716199	-0.0366597	-0.0495221	-0.0812784	0.0304674	-0.0457509	-0.0856778	-0.0470061	-0.0091796	-0.0893086	0.002359	-0.0481979	-0.0420911	-0.0284246	0.00524127	0.0285742	-0.0502587
176441	-0.225357	-0.126653	-0.228975	-0.207381	-0.194286	-0.105639	-0.238753	0.0847798	0.0500844	-0.298452	-0.191506	-0.0769841	-0.229323	-0.0407037	-0.239955	-0.281511	-0.185062	-0.0482417	-0.228032	-0.106127	-0.0476722	-0.0203169	-0.0395547	0.0354945	-0.32556	-0.126578	-0.287258	-0.137992	0.0454309	0.210484	0.0983535	-0.0890733	0.230804	0.104738	0.0632792	-0.114773	-0.193489	-0.36767	-0.0809473	-0.201397	0.0690766	-0.184678	-0.126416	-0.265209	-0.420873	-0.429364	-0.0947197	-0.197713	-0.185263
176542	-0.0341995	-0.0341319	-0.0985341	-0.0646022	-0.130956	-0.123858	-0.127146	0.120326	0.0807558	-0.258278	-0.295573	-0.292158	-0.0816082	0.00928527	-0.1372	-0.226728	-0.213191	-0.0388852	-0.191332	-0.158307	-0.0657086	-0.180136	-0.00294109	-0.0586819	-0.232059	-0.191694	-0.168973	-0.297637	-0.116701	0.0635373	0.0518707	-0.0539517	0.151174	0.0665045	0.0186335	-0.118732	-0.12328	-0.160763	-0.0887463	-0.0069066	0.0290867	-0.137177	-0.137919	-0.260428	-0.145379	-0.0990115	-0.0523025	-0.160007	-0.252197
176744	-0.112114	0.00794971	-0.143341	-0.240756	-0.228234	-0.157267	-0.134216	-0.0404343	-0.047044	-0.180099	-0.196233	-0.214365	-0.138819	0.0138092	-0.200999	-0.115768	-0.161957	-0.103403	-0.0979622	-0.190279	-0.103972	-0.118042	0.089142	-0.0324132	-0.0827089	-0.239139	-0.0842927	-0.0608367	-0.122056	0.0233424	-0.00414105	-0.214157	0.0951406	0.0368191	-0.0122457	-0.0556433	-0.0845005	-0.11172	-0.0125347	-0.143318	-0.0091825	-0.105928	-0.0760173	-0.127808	-0.111509	-0.0718197	-0.169186	-0.251599	-0.108323
176845	-0.0994324	0.00786155	-0.122084	-0.0677692	-0.0648646	-0.037682	-0.0194835	0.0716701	0.0932674	-0.0496138	-0.159059	-0.111656	-0.0642187	-0.0534863	-0.186769	-0.0625792	-0.0749794	0.00780529	-0.0530854	-0.0453428	-0.0282373	-0.0312057	0.0275903	-0.0703469	-0.0973443	-0.0878706	-0.190339	-0.0849671	-0.124977	0.0130437	-0.0710819	-0.0334783	0.0226144	0.0158316	-0.0783069	-0.00505393	-0.144396	-0.175856	-0.0355007	-0.0433807	-0.041725	-0.0185203	-0.0322811	-0.0641851	-0.121386	-0.0861914	0.00347005	-0.0641959	-0.0321096
177140	-0.0712225	0.0638179	-0.198902	-0.106075	-0.119456	-0.0528765	-0.0755882	0.0472765	0.0472926	-0.12775	-0.136801	-0.155456	-0.0367281	-0.196613	-0.22348	-0.0688602	-0.0781968	-0.116281	-0.0470821	-0.0836669	-0.0471886	-0.162863	0.0777643	-0.0895041	-0.0976447	0.0256553	-0.262861	-0.102465	-0.1949	-0.134033	-0.179715	-0.0667827	-0.107785	-0.125052	-0.198641	-0.0385626	0.0205851	-0.0391349	-0.0990597	0.113411	-0.0147515	-0.0284807	-0.000353481	-0.0145479	-0.0848844	-0.199925	-0.0531696	-0.0662804	-0.168415
177241	-0.0155959	-0.0547066	-0.0874782	-0.0491658	-0.00702696	-0.0207248	-0.0270196	0.00480861	0.00192092	-0.145901	-0.0151277	-0.0654654	-0.0203884	-0.0842577	-0.0865164	-0.00834925	-0.0264141	-0.0194695	-0.0119291	-0.0346309	-0.0363556	-0.0218157	-0.0500283	-0.0205573	-0.150455	-0.0153891	-0.0904787	-0.0929426	-0.0825377	-0.0639296	-0.0365036	-0.0965924	-0.0073628	-0.0721586	-0.101092	0.0202226	-0.0965689	-0.107168	0.019274	-0.0170476	0.020772	0.023	0.0175444	-0.0922158	-0.117122	-0.0912345	-0.0397486	-0.013212	-0.0255748
177645	0.0347181	-0.0861253	-0.0760962	-0.0111302	0.0224711	-0.0121207	-0.0227332	0.141558	0.0917275	-0.0898043	0.0174952	-0.235181	0.0212311	-0.0433025	-0.127653	-0.0609567	-0.108819	-0.053081	-0.0340991	-0.0208054	-0.00728082	-0.0233848	-0.0601075	-0.0349526	-0.115347	0.0214347	-0.168813	-0.113666	-0.11453	-0.0224691	-0.0460729	-0.0807444	-0.0298542	-0.0398521	-0.0559172	-0.0842546	-0.106933	-0.198671	0.0653896	0.0168235	0.0145964	-0.0282873	-0.0873071	-0.192588	-0.17377	-0.179917	-0.0559873	-0.1405	-0.0582185
177746	-0.087983	-0.000672902	-0.180177	-0.0410031	-0.0309152	0.0202292	0.0422032	0.0870958	0.109467	-0.0534361	-0.0734	-0.192857	0.0440691	-0.26158	-0.221355	0.00203172	0.000560352	0.0414446	0.0281687	0.0475183	0.0143432	0.0806381	0.0524382	-0.0531667	-0.18855	-0.0424307	-0.241865	-0.15648	-0.0925747	-0.0508399	-0.0970409	-0.255846	-0.0782635	-0.185767	-0.140208	-0.0809091	-0.0867672	-0.18178	0.0566342	-0.0583487	0.0819993	0.0145212	-0.0431197	-0.239382	-0.3833	-0.368704	-0.0769373	-0.0270588	-0.0601573
178142	-0.0417816	-0.0267382	-0.128727	0.025221	-0.0193762	0.00832987	0.0488865	0.118268	0.160705	-0.253201	-0.28145	-0.234535	-0.0362513	-0.0852027	-0.158905	-0.0474796	-0.0910664	-0.0957793	-0.0720058	-0.0386804	-0.000520736	0.0222742	0.0182149	0.0661104	-0.163403	-0.171826	-0.217036	-0.110811	-0.108118	-0.0295357	-0.0745938	-0.208757	0.00449827	0.00760469	-0.0912585	-0.0977285	-0.110135	-0.308704	0.0185591	0.0254742	0.103415	-0.102687	-0.00135559	-0.262745	-0.271078	-0.195083	-0.0720331	-0.0801225	-0.112256
178243	-0.0893674	-0.16853	-0.260556	-0.215079	-0.138704	-0.0431761	-0.0855801	-0.0569547	-0.0641328	-0.35289	-0.11418	-0.461274	-0.196671	-0.10078	-0.139517	-0.125914	-0.130733	-0.152414	-0.104983	-0.115088	-0.0355412	-0.194145	-0.209821	-0.101441	-0.264138	0.0586434	-0.16556	-0.460941	-0.0262842	0.0121833	-0.10465	-0.180351	0.0405164	0.0271848	-0.128414	-0.156987	-0.0633586	-0.177169	-0.0221195	-0.05801	-0.0165304	-0.105208	-0.165826	-0.242923	-0.110795	-0.367767	-0.166581	-0.239743	-0.0946139
178647	-0.0584025	-0.0844299	-0.0925313	-0.0180254	-0.0364625	-0.0482994	-0.0411693	-0.0474933	-0.0868747	-0.145368	-0.0696076	-0.113436	-0.0278037	0.0969139	0.0565016	-0.0220985	-0.205906	-0.170998	-0.0633929	-0.0804839	-0.105104	-0.00813672	-0.10291	-0.133319	-0.206905	0.0151781	0.0512705	-0.163475	0.0195564	0.021849	-0.0505161	0.0782956	0.0318034	-0.00459526	0.00370826	-0.00345905	-0.0808195	-0.0790925	0.0279576	-0.0866284	-0.0513363	-0.0987461	-0.0495609	-0.179133	-0.0979298	-0.0618301	-0.230388	-0.14595	-0.115322
178748	-0.0906785	-0.0628912	-0.111843	-0.0161971	-0.0139925	-0.0319724	-0.0658084	-0.0836248	-0.100991	-0.148645	-0.125655	-0.128928	-0.0486186	-0.087922	-0.151227	-0.0617398	-0.0309388	-0.0270901	-0.0615735	-0.0478541	-0.0059295	-0.0363774	-0.0568888	-0.0519884	-0.195115	-0.0794858	-0.154978	0.0286484	-0.0252484	0.0124209	-0.0985199	-0.120919	0.0267406	-0.0112724	-0.0966783	-0.0856766	-0.178218	-0.175095	-0.0474161	-0.0737421	-0.031507	-0.0523732	-0.0779552	-0.13876	-0.0756281	-0.117929	-0.133795	-0.118677	-0.00575247
178849	-0.0238828	-0.0049627	-0.00858145	-0.00324672	-0.0172159	-0.0258491	0.0632771	0.0423149	0.0255028	-0.0948966	-0.214845	-0.219879	0.0133486	-0.0614468	-0.115039	0.00318826	0.00262112	-0.0868376	0.0413813	0.0407185	0.0246648	0.0566494	0.0351514	0.0237672	-0.0792475	-0.0800727	-0.238834	-0.0206854	-0.141151	-0.0657442	-0.141171	-0.0955669	-0.0687617	0.00853468	-0.0146821	-0.120585	-0.165709	-0.169321	0.0185521	-0.114148	-0.027885	0.00936968	-0.0932764	-0.20084	-0.125039	-0.0593468	-0.147234	-0.0646412	0.00881975
178950	-0.108185	0.116753	0.0319136	-0.156955	-0.127463	-0.140183	-0.0892436	0.0830319	0.0757737	-0.281079	-0.137343	-0.298735	-0.0466937	-0.121656	-0.248412	-0.119786	-0.109028	-0.0143164	-0.0864206	-0.100954	-0.0783442	-0.102174	0.127007	0.00987716	-0.132253	0.008489	-0.314962	0.109752	-0.144727	0.0399696	-0.0648191	-0.115708	0.0797747	-0.0831179	-0.0894443	-0.168691	-0.223008	-0.298897	0.0663646	0.0062435	-0.0351262	0.082778	-0.133418	-0.144769	-0.0705978	-0.0689999	-0.0430616	-0.0582245	-0.0418104
179245	0.030443	-0.0610733	-0.0196939	-0.0234562	-0.035714	-0.0315366	-0.0657708	-0.0267702	-0.0546306	-0.0845679	-0.027708	-0.0382219	-0.0100177	0.0168932	0.0154465	-0.0291238	-0.0364681	-0.0982695	-0.022602	-0.0301285	-0.0142489	-0.0496405	-0.0939839	0.00176991	-0.0792064	-0.0241549	0.00365638	-0.100695	-0.00624213	0.0103601	-0.0402427	0.0209276	0.0158196	0.0136203	-0.0106259	-0.017212	-0.00402708	0.018979	-0.027258	0.0435187	0.0152087	-0.0242991	-0.0153086	-0.0428233	0.000878922	-0.0116704	-0.0484278	-0.0241256	0.0110292
179346	-0.198408	0.0707047	-0.260488	-0.125094	-0.149369	-0.00323739	-0.196862	0.0861827	0.0667473	-0.3042	-0.218171	-0.423101	-0.12898	-0.117488	-0.252095	-0.150918	-0.236056	0.0527316	-0.137416	-0.00129576	-0.0143885	-0.147566	-0.150793	0.0257916	-0.393264	-0.142808	-0.158398	-0.360505	-0.0233355	0.086039	-0.0151751	-0.202283	0.0417369	0.0303684	0.0947009	-0.219987	-0.292148	-0.325984	-0.24351	-0.184994	-0.0416364	-0.275807	-0.224637	-0.3077	-0.262284	-0.135274	-0.251374	-0.157536	-0.29621
180129	0.0568885	0.0691617	0.0348075	0.0880808	0.0766513	0.0955817	0.0692069	0.0581668	0.087324	-0.0085023	-0.00252156	-0.00842554	0.0687726	-0.225079	-0.300948	0.0559065	0.0428004	0.0407172	0.0250505	0.0671876	0.0705254	0.0342805	0.118095	0.0643431	-0.109815	0.0739714	-0.25023	-0.0588621	-0.402302	-0.18365	-0.0609888	-0.203147	-0.090286	-0.150355	-0.249372	-0.119913	-0.0409804	-0.140826	0.0165381	-0.0569722	0.0455266	0.0472952	-0.0209429	-0.207361	-0.232678	-0.1137	-0.189602	0.0706704	-0.1347
180230	-0.17459	-0.116874	-0.196613	-0.242243	-0.221074	-0.110709	-0.18401	0.0624739	0.0652742	-0.188939	-0.453765	-0.395262	-0.151173	-0.0877878	-0.380407	-0.135264	-0.0538697	-0.169101	-0.0326162	-0.0827586	-0.139803	-0.128218	-0.0852321	-0.0866375	-0.140351	-0.336665	-0.393473	-0.0533724	-0.152086	-0.0287321	-0.0173647	-0.291994	0.0463868	0.0192697	-0.149183	-0.1901	-0.287484	-0.398604	0.00483416	-0.292146	0.109012	-0.0595951	-0.225698	-0.358648	-0.348676	-0.389776	-0.271005	-0.113969	-0.235647
180432	-0.118512	0.121016	-0.154991	-0.11011	-0.130013	-0.134514	-0.0999246	0.00480524	-0.0252374	-0.196548	-0.182244	-0.334131	-0.0648353	-0.0152115	-0.196175	-0.076141	-0.14027	-0.0524473	-0.0501098	-0.0906369	-0.0801752	-0.134247	0.0220633	-0.0196709	-0.303509	-0.097109	-0.238102	-0.0303566	-0.246574	0.000141357	0.0394857	-0.193137	0.0828458	0.004375	0.0733506	-0.166588	-0.313344	-0.364044	-0.0814509	-0.175065	0.0153313	-0.115885	-0.0646335	-0.193893	-0.277156	-0.237511	-0.061565	-0.0910415	-0.070644
180533	-0.170196	-0.119957	-0.129854	-0.200348	-0.21376	-0.200565	-0.082919	0.0834401	0.106457	-0.436793	-0.215544	-0.238206	-0.165869	-0.156506	-0.3724	-0.206347	0.0246002	-0.0126632	-0.212347	-0.177717	-0.095492	-0.106259	-0.0210613	-0.0515841	-0.0121896	-0.135642	-0.23901	-0.437018	-0.0733812	0.0244061	-0.0403395	-0.183842	0.0484446	-0.0605508	-0.137026	-0.218409	-0.224602	-0.319616	-0.0272717	-0.159978	-0.00548621	-0.11363	-0.136251	-0.226	-0.169001	-0.109917	-0.0322287	-0.000810621	-0.123791
180735	-0.0460064	0.0160175	-0.0726312	-0.0987258	-0.138215	-0.147775	-0.127241	0.151197	0.141703	-0.130171	-0.119003	-0.0180185	-0.156256	-0.0839962	-0.224552	-0.0938613	-0.1017	-0.125293	-0.0993106	-0.0762013	-0.0573572	-0.103051	0.0377739	0.0567035	-0.242721	-0.108314	-0.145593	-0.159552	-0.0794879	-0.00243705	-0.0112222	-0.121941	0.0113277	-0.0265749	-0.129366	0.0203041	-0.104429	-0.242869	0.112756	0.0558122	0.0204701	0.0152045	-0.00153703	-0.209585	-0.269763	-0.293731	-0.03064	-0.145292	-0.00506224
180836	-0.098876	-0.0344641	-0.0598289	-0.0884863	-0.0161174	0.000364499	-0.0525136	0.0352064	0.0403106	-0.092996	0.0346746	-0.0347749	-0.016943	-0.115333	-0.124694	-0.0272285	-0.00776772	-0.0106902	-0.0358453	0.0271428	0.0217341	-0.00117346	0.00322705	0.0182271	-0.0972936	-0.0580564	-0.0875999	-0.0357627	-0.00422145	-0.0754115	0.0153691	-0.155376	-0.0281084	-0.0711721	-0.0662152	-0.0544625	-0.0735681	-0.099056	-0.00377733	-0.0248907	-0.028892	0.00202863	-0.033885	-0.0178429	-0.0661203	0.0691277	-0.0243918	-0.0436343	-0.0241279
180937	-0.0934416	-0.115225	-0.305677	-0.199917	-0.217083	-0.183724	-0.117268	0.0244321	-0.0029594	-0.229284	-0.407391	-0.342992	-0.194653	0.00212972	-0.137831	-0.234258	-0.133641	-0.229013	-0.204194	-0.130487	-0.135545	-0.184809	-0.134133	-0.0607813	-0.380386	-0.0135232	-0.335822	-0.362872	0.0300835	0.107079	-0.053783	-0.220566	0.119029	0.0820538	-0.0890658	-0.0640788	-0.245897	-0.281465	-0.0469809	-0.151943	-0.057244	-0.169584	-0.174931	-0.288026	-0.228412	-0.0815844	-0.339108	-0.183352	-0.112772
181131	-0.099449	-0.0790434	-0.194157	-0.108248	-0.131229	-0.0654923	-0.0216015	-0.0600536	-0.0308572	-0.133746	-0.0986941	-0.120234	-0.115351	-0.00876458	-0.159205	-0.128885	-0.0365564	-0.0321464	-0.0912773	-0.0424704	-0.0468039	-0.0781887	-0.150797	-0.00831339	-0.0360776	0.0183092	-0.100308	-0.0955145	-0.00780398	0.0254425	-0.0445697	0.0132261	0.0512632	0.0479719	0.00623186	-0.0573261	-0.111433	-0.135619	-0.0437642	-0.0622091	0.00990547	-0.0216928	-0.0521713	-0.13744	-0.0798132	-0.190815	-0.173106	-0.114783	-0.0694163
181232	-0.0792778	0.144975	-0.350117	-0.135199	-0.206632	-0.204444	-0.0909772	0.0374073	0.118942	-0.313828	-0.169857	-0.210162	-0.140037	-0.159281	-0.369272	-0.140756	-0.181049	-0.0831212	-0.0967178	-0.0271752	-0.139318	-0.205259	0.295406	0.107593	-0.362672	-0.375315	-0.0427351	-0.0902534	0.018422	0.0889481	-0.0286533	-0.281234	0.033209	-0.32566	-0.212113	-0.514587	-0.485583	-0.540058	-0.160081	-0.104046	-0.117034	-0.162211	-0.296606	-0.0738436	-0.450853	-0.436953	-0.229241	-0.27553	-0.0948803
181636	-0.066744	-0.0654151	-0.139964	-0.156949	-0.130719	-0.0451674	-0.086603	-0.0160648	-0.0275205	-0.0829028	-0.0212594	-0.0350872	-0.0906606	0.00868369	-0.0534293	-0.0685064	-0.0519401	-0.056896	-0.0236412	-0.0277318	-0.0364092	-0.0663216	-0.058004	0.050627	-0.0592609	0.00575587	-0.0568007	-0.0174482	-0.0544802	0.00856681	-0.033785	0.000897266	0.0189034	-0.0253127	0.0106209	-0.0492221	-0.0386772	-0.019526	-0.0548866	-0.0489537	-0.00674688	-0.0859891	-0.0289186	-0.0576035	-0.078472	-0.0325445	-0.0750718	-0.0577313	-0.0436278
182032	-0.0691756	-0.15821	-0.067426	-0.0822905	-0.149568	-0.153104	-0.0815336	0.0790239	0.0800008	-0.197456	-0.116753	-0.187781	-0.0992216	-0.0304436	-0.14343	-0.0831476	-0.0891293	-0.204171	-0.0730095	-0.103399	-0.2	-0.18902	-0.180426	0.134493	-0.0541198	-0.0241726	-0.100368	-0.0311722	-0.168511	-0.138112	-0.179594	0.05613	-0.138895	-0.0538788	-0.0662526	0.0603298	-0.000457625	-0.0109939	0.03196	0.119774	0.145515	-0.106381	0.077865	-0.114179	-0.21096	-0.108872	-0.0644011	-0.209273	-0.145251
182436	0.023076	-0.0491677	-0.00533872	0.0296778	0.0367547	0.0181587	0.0139022	-0.103832	-0.075836	-0.013032	-0.0964967	-0.098984	0.0139631	-0.0861058	-0.0950528	-0.122777	-0.130929	-0.205423	0.0328648	0.0109223	-0.00380712	-0.0518983	-0.0791146	-0.0706518	-0.0359449	0.0654708	-0.0101622	-0.061444	-0.102747	-0.10104	-0.0507505	-0.0372241	-0.113922	-0.083351	-0.0837939	-0.0727414	-0.0469813	-0.0196364	-0.054225	-0.0613743	-0.0517675	-0.0892113	0.100116	-0.141498	-0.0352567	-0.1091	-0.173382	-0.121201	0.0120974
182739	0.0609359	-0.0463714	0.0215808	0.0311432	0.00406366	-0.0540462	-0.0759919	-0.0186492	0.00791251	-0.104969	-0.203125	-0.223219	0.0422459	-0.0514988	-0.0558069	0.0227845	-0.0596572	-0.0413763	0.0277709	-0.0700588	-0.0783249	-0.0313939	-0.000685291	-0.0605194	-0.154239	-0.102562	-0.185177	-0.0827583	0.0227481	0.0502895	0.0143572	-0.0969275	0.0560177	0.070464	-0.00714669	-0.0807919	-0.146215	-0.202984	-0.0107848	-0.126583	0.00857606	-0.0245113	-0.0772713	-0.155368	-0.177342	-0.184812	-0.027366	0.0136246	-0.0932497
182840	-0.119991	0.0845957	-0.223526	-0.126047	-0.255453	-0.132344	-0.101787	-0.0805056	-0.0411687	-0.378616	-0.223192	-0.237367	-0.200647	-0.0359003	-0.276577	-0.219498	-0.226235	-0.0399297	-0.056193	-0.196871	-0.213276	0.0576305	0.0391154	-0.0680687	-0.330135	-0.0691047	-0.103995	-0.132598	-0.135263	0.145876	0.0231021	-0.157312	0.0627714	0.0347037	0.0318156	-0.203203	-0.223453	-0.236566	-0.0422614	-0.14505	-0.036824	-0.152572	-0.247621	-0.191953	-0.111702	-0.238877	-0.250134	-0.24278	-0.119507
183034	-0.122577	-0.0668427	-0.0626392	-0.132577	-0.077464	-0.0408818	-0.104512	0.0822281	0.079425	-0.195538	-0.0490504	0.074984	-0.0479297	-0.137271	-0.19934	-0.0598632	-0.0533453	-0.147005	-0.0400466	-0.0637495	-0.0676925	-0.0609017	-0.0694927	0.0567798	-0.118307	0.00913803	-0.154066	0.0182989	-0.0868627	-0.113322	-0.0641288	-0.1542	-0.0711142	0.00905804	-0.0455122	-0.0454878	-0.119904	-0.236495	0.0490808	-0.112687	-0.0371543	-0.0780273	-0.0478273	-0.193813	-0.199223	-0.0512916	-0.0991388	-0.0558218	-0.13295
185038	-0.0753132	0.0606413	-0.0670812	-0.00376432	-0.00273864	0.00453191	0.0201568	0.0759104	0.073497	-0.0863822	-0.0225869	-0.0885276	-0.0668601	-0.0891296	-0.144339	-0.0715903	-0.180342	0.0474812	-0.0322922	-0.0471663	0.0282983	0.0296201	0.0648318	-0.0825676	-0.15029	-0.0862878	-0.169834	-0.111127	-0.119275	0.0376482	-0.0294786	-0.0814363	0.0577829	-0.040877	-0.110034	0.00882376	-0.0308068	-0.121762	0.0385428	0.013517	0.0998473	0.0117746	0.0603007	-0.0808595	-0.136266	-0.128542	-0.0866712	-0.0613688	-0.121356
185139	0.10441	0.0658201	0.0210685	0.115634	0.147407	0.0621166	0.0577417	0.041059	0.0190857	-0.031977	-0.170892	-0.288595	0.116805	0.0102356	-0.0883565	-0.000775107	-0.145879	-0.130481	0.0693511	0.0830523	0.027458	-0.0197819	0.0440718	-0.0659542	0.042359	0.0443962	-0.0857559	-0.104566	-0.140142	-0.036511	0.0512955	-0.0253063	-0.0155987	-0.0128151	0.0061163	-0.0491397	0.0442149	0.0301204	-0.0410886	-0.0176191	0.00243534	-0.14819	0.0114116	-0.159249	-0.0856276	-0.13303	-0.22577	-0.280187	-0.189662
185341	-0.223218	-0.0526408	-0.317327	-0.250168	-0.259357	-0.167906	-0.0804343	0.0817037	0.0895724	-0.267982	-0.0543339	-0.271405	-0.21989	-0.134644	-0.306632	-0.159752	-0.165402	-0.171863	-0.239244	-0.0940977	-0.0143219	-0.0475345	0.0975399	-0.0201734	-0.24416	-0.0302494	-0.353632	-0.0753596	-0.242825	0.0777884	-0.0736821	-0.229474	0.105154	0.0370925	-0.230691	-0.0764673	-0.210209	-0.228539	-0.0430145	-0.110819	-0.126884	-0.0241648	-0.121913	-0.282923	-0.288784	-0.120036	-0.0632788	-0.135227	-0.0156049
185442	-0.0465719	0.0120911	-0.135469	-0.0905452	-0.0545626	-0.00518289	-0.0225188	-0.0234921	0.0294007	-0.227865	-0.102382	-0.220772	-0.08634	-0.0889448	-0.15554	-0.0371146	-0.0365137	-0.0150593	-0.0494037	-0.0601298	0.0226116	0.0108807	-0.03063	-0.0572053	-0.230088	-0.12839	-0.187947	-0.188111	-0.0109133	0.012907	-0.0345106	-0.0722178	0.0293877	0.0282364	-0.0587587	-0.119469	-0.20716	-0.141866	-0.0669477	-0.0922757	-0.0579271	-0.071828	-0.0807432	-0.180951	-0.191958	-0.0695765	-0.178892	-0.11821	-0.0633626
185846	-0.0139298	-0.0419824	-0.0984103	-0.0875186	-0.136596	-0.0497393	-0.0589904	-0.0245983	0.0164911	-0.0117779	-0.0690367	-0.182275	-0.0599108	-0.0812912	-0.106902	-0.0222285	-0.000840904	-0.101955	-0.0248328	-0.0324242	-0.0333785	-0.076702	-0.0377643	0.0208723	-0.0803997	0.0361965	-0.0685272	0.0132189	-0.0746678	0.0247132	0.00597779	-0.0709483	0.0104457	-0.0164242	-0.0211901	-0.00184962	-0.0969325	-0.0659444	0.0349752	-0.0520026	0.000722758	0.0310414	-0.0272948	-0.131232	-0.0160484	-0.0935107	-0.0866457	-0.0593566	0.0460462
185947	-0.0388398	-0.0518775	-0.373383	-0.149596	-0.177009	-0.13225	-0.0379016	0.055336	0.0714438	-0.376337	-0.0928767	-0.212859	-0.246174	0.0464088	-0.251294	-0.13687	-0.168194	-0.0881497	-0.0867475	0.0394258	-0.0154183	-0.0972822	-0.132399	0.0340401	-0.491056	-0.264512	-0.341678	-0.373498	-0.16505	0.0277192	-0.0149232	-0.217635	0.044575	0.068895	-0.0199959	-0.387065	-0.284512	-0.374469	-0.0532496	-0.0891282	-0.0386202	0.0370986	-0.0741041	-0.287281	-0.119342	-0.231734	0.0446808	-0.00795956	0.0553742
186040	-0.0644807	-0.0681372	-0.182577	-0.0658014	-0.124033	-0.0885078	-0.0706704	0.144142	0.137233	-0.183495	-0.178869	-0.349264	-0.0992816	0.0304325	-0.169865	-0.102113	-0.105351	-0.130786	-0.0605503	-0.094923	-0.0542897	-0.0627971	-0.100084	0.0515834	-0.0736936	-0.0575872	-0.0297329	-0.320356	-0.0771624	-0.0305152	0.0205196	-0.165669	0.0734509	-0.0122981	-0.129217	-0.0407327	-0.121689	-0.210243	0.122151	0.043869	0.0927014	0.0635862	-0.0661395	-0.248297	0.0200418	-0.104397	-0.0981254	-0.234943	-0.133024
186141	0.0944803	-0.00898434	0.0618026	0.165657	0.208931	0.221847	0.0895715	-0.100691	-0.0976899	-0.151818	-0.115308	-0.129482	0.105079	-0.0450313	-0.0148661	0.130372	-0.109887	0.00584773	0.101134	0.157313	0.124854	0.0327053	0.0606103	0.0950393	-0.116577	-0.218835	-0.15056	-0.176678	-0.158733	-0.00844869	-0.0448375	-0.0425958	-0.0526593	-0.0957884	-0.029485	-0.170392	-0.14447	-0.155567	-0.102742	-0.138019	-0.0585673	-0.0842032	-0.100198	-0.304685	-0.164674	-0.24206	-0.102346	-0.106343	-0.0194182
186444	-0.039705	-0.0453206	-0.0722538	-0.0428635	-0.0428612	-0.0676647	-0.116641	0.00310752	-0.0068561	-0.139855	-0.0701665	-0.0347127	-0.000835564	-0.0594203	-0.0905923	-0.0927883	-0.0231292	-0.093709	-0.090933	-0.0911945	-0.107879	-0.104183	-0.0462636	-0.0192778	-0.184579	-0.0550547	-0.137211	-0.135633	-0.042565	-0.044141	-0.00919631	-0.0481905	-0.0177108	-0.0523933	-0.0350449	-0.0787087	-0.0439522	-0.0747	-0.0484991	-0.0855346	-0.0474053	-0.0789764	0.00265802	-0.087168	-0.0771231	-0.045083	-0.080055	-0.0399767	-0.0468811
186545	0.0127626	-0.0185297	-0.0781993	-0.0134283	0.00503979	0.0427183	0.0438221	-0.0121067	-0.0221553	-0.0480675	-0.0245379	0.00918983	0.0284579	-0.00711832	-0.0304073	-0.00472973	-0.122361	-0.0880852	0.00653058	0.0203175	-0.0148559	-0.0820638	-0.0536905	-0.0343854	-0.0924826	0.0634041	-0.08527	-0.133004	-0.0175909	0.0164391	-0.0129413	-0.0258082	0.02214	-0.00579918	-0.0800148	-0.027117	-0.0103771	-0.0630622	-0.00548701	-0.0316668	0.0134209	-0.0643069	0.0206277	-0.0794726	-0.0750096	-0.10885	-0.0889259	0.0159432	-0.04056
186848	-0.0832292	-0.0100672	-0.18721	-0.0296504	-0.116696	-0.122731	-0.113596	0.128093	0.138786	-0.231631	-0.0597591	-0.187062	-0.102512	-0.0757539	-0.163567	-0.116931	-0.171364	-0.0762813	-0.114809	-0.0961258	-0.0425195	-0.103875	-0.0140592	0.0257419	0.0484913	-0.116275	-0.163075	-0.112641	0.0151857	0.0113685	0.0181559	-0.165803	0.0155127	-0.104098	-0.133269	-0.136481	-0.0115621	-0.0461771	0.0298642	0.013484	0.0712032	-0.0403059	0.0208458	-0.27046	-0.137872	-0.159741	-0.199241	-0.136512	-0.227778
187143	0.0291589	0.0437012	-0.184039	0.0940849	0.0184237	-0.0142116	-0.0175397	0.0740883	0.102099	-0.145222	-0.0168707	-0.0595152	0.0722654	-0.172315	-0.225287	0.0751401	-0.0384282	0.0223976	0.0287874	0.039185	0.0136202	-0.0634427	0.0491912	-0.0165384	-0.14697	-0.0793603	-0.151213	-0.0101943	-0.0789231	-0.0248016	-0.0347728	-0.152658	-0.032675	-0.0418383	-0.143377	-0.0462954	-0.116571	-0.160046	0.0157378	0.0583971	0.00739018	-0.018005	-0.109432	-0.152423	-0.166388	-0.179583	-0.0404177	0.00603372	-0.0412968
187345	-0.0606134	-0.0290437	-0.164058	-0.107541	-0.10787	-0.0281377	-0.0157454	0.0253797	0.0213739	-0.0856572	0.0332	-0.0744166	-0.128148	-0.12603	-0.124042	-0.0825988	0.00681281	-0.0143103	-0.0554732	-0.0813908	0.00109811	0.0793373	-0.0438776	-0.0737674	-0.0958244	-0.16223	-0.142826	-0.145226	-0.10561	0.0302462	-0.00555597	-0.091885	0.0332617	0.0430858	0.00166567	-0.0293442	-0.119545	-0.180228	0.043688	-0.0167761	-0.0348872	-0.0353933	-0.0976973	-0.141569	-0.0933987	-0.011911	-0.0789313	-0.0804698	-0.0641547
187547	-0.0273666	-0.016881	-0.0553191	-0.100523	-0.0913165	-0.0470585	-0.034179	0.0156151	0.0314541	-0.220298	-0.15732	-0.382773	-0.0653634	-0.0197418	-0.047711	-0.0163331	-0.061808	-0.0552239	-0.0861579	-0.0145853	-0.0538191	-0.0673068	-0.0252601	0.108503	-0.0278488	-0.212624	-0.273137	-0.023155	-0.00981016	0.0522249	0.0554509	-0.191056	0.0698109	-0.0260161	-0.0696485	-0.0245308	0.0301755	-0.116084	-0.109464	6.19955e-05	-0.0175148	0.0615486	-0.0907306	-0.276543	-0.0295426	-0.171336	-0.0981377	0.0240767	-0.0108238
187850	-0.0340378	-0.0335172	-0.0935338	-0.084108	-0.0868602	-0.0511419	-0.0509017	-0.0196877	-0.0154537	-0.141345	-0.053635	-0.0541041	-0.0663449	-0.0436533	-0.107745	-0.0728788	-0.0543833	-0.073911	-0.0542484	-0.0302086	-0.0228048	-0.0282559	-0.0484429	-0.0485238	-0.09007	0.0277712	-0.0987499	-0.114348	-0.114157	-0.00137743	-0.0640854	-0.0381879	0.0252851	-0.0103307	-0.0285531	-0.0609398	-0.159613	-0.114849	-0.0124748	-0.0711425	-0.047761	-0.0227947	-0.0155722	-0.108002	-0.129792	-0.109603	0.0301724	0.00864255	-0.0575143
188145	-0.120766	-0.048269	-0.215601	-0.101832	-0.122574	-0.0786254	-0.0829359	0.00772329	0.0253605	-0.116674	-0.137581	-0.173805	-0.0791455	-0.0928791	-0.102011	-0.0260445	-0.045123	-0.0251355	-0.0147848	-0.094903	-0.0638594	-0.103133	0.0206027	-0.039687	-0.186208	-0.145396	-0.185627	-0.144288	-0.00955329	0.0827727	0.0437511	-0.155825	-0.0293885	-0.100149	-0.126467	-0.0346481	-0.0944056	-0.184213	0.141837	0.0323471	0.0430023	-0.0559249	-0.0909751	-0.229251	-0.150257	-0.154399	-0.0892823	-0.0748356	0.0130086
188347	-0.119058	-0.0687562	-0.14634	-0.135716	-0.100439	-0.0792599	-0.0234871	0.00419944	-0.0147611	-0.187765	-0.10983	-0.0868085	-0.0741788	-0.0384665	-0.144334	-0.0569693	-0.00415571	-0.0536145	-0.0442203	-0.0307273	-0.0469199	-0.068124	-0.0376474	-0.0905649	-0.249709	-0.0660045	-0.0889797	-0.0560646	-0.096271	-0.0114163	-0.0224049	-0.0611639	0.0916883	0.113231	0.0684321	-0.0449059	-0.115186	-0.11044	-0.0299051	-0.104142	-0.0287209	-0.0759764	-0.0812049	-0.136909	-0.0854506	-0.0909914	-0.0848899	0.0155251	-0.0302767
188448	-0.108598	-0.117353	-0.166723	-0.13465	-0.146478	-0.101633	-0.065003	0.0796616	0.0997785	-0.106793	-0.0307724	-0.264298	-0.145868	-0.189725	-0.285502	-0.160952	-0.137366	-0.143026	-0.139678	-0.171283	-0.0874826	-0.100663	-0.0772686	0.0740468	-0.0248877	-0.0456699	-0.243034	-0.016474	-0.0978047	-0.134403	-0.147765	-0.137899	-0.0131188	-0.0645791	-0.099967	-0.148162	-0.168201	-0.170316	-0.0272639	-0.014264	-0.0151903	-0.0830171	0.0580998	-0.0996444	-0.249094	-0.283356	-0.0987026	-0.154809	-0.126536
188549	-0.184058	-0.141856	-0.128893	-0.221308	-0.225243	-0.153438	-0.215119	0.0606365	0.103545	-0.289185	-0.232477	-0.343074	-0.138927	0.0594374	-0.00432204	-0.151742	-0.134241	-0.226397	-0.133077	-0.141095	-0.115291	-0.163825	-0.103052	-0.00292385	-0.203271	-0.123269	-0.0313791	-0.0244393	0.0177144	0.0575991	-0.0246145	0.0512142	0.0802316	0.0765361	0.00396502	-0.0334892	-0.169718	-0.175938	-0.0551382	-0.0415463	0.0693429	-0.239543	-0.179011	-0.109034	-0.0668297	-0.11663	-0.24648	-0.17582	-0.171192
188751	-0.0270479	-0.0567849	-0.111003	-0.0528271	-0.0695073	-0.0537576	-0.0165264	-0.00624263	-0.0240628	-0.0494153	-0.00652826	-0.0533056	-0.0473751	-0.0789244	-0.0521352	-0.0742157	-0.0693782	-0.0519451	-0.0318734	-0.0806179	-0.036431	-0.0317573	-0.0531357	-0.0148542	-0.077939	-0.00363299	-0.0845296	-0.0938636	-0.0788259	-0.0622623	-0.111989	-0.0098757	-0.0524627	-0.00557349	-0.0500562	-0.0279516	-0.0106158	-0.0613229	-0.052407	-0.114641	-0.0158967	-0.0579758	-0.00945428	-0.0699999	-0.0516923	-0.0527811	-0.079558	-0.065979	-0.0433521
189349	0.0466598	-0.0406593	-0.199166	-0.0416248	0.00169741	-0.007765	-0.0266165	-0.0469775	-0.0335654	-0.190512	-0.172984	-0.233158	-0.0377177	-0.0339826	-0.104349	-0.0614152	-0.0514591	-0.0396996	-0.0469764	-0.0768272	-0.119801	-0.0327149	-0.0939231	-0.0437905	-0.155486	-0.0915316	-0.126771	-0.177734	-0.144559	0.0651379	-0.0694402	-0.0862397	0.0569596	0.00276828	-0.000859256	-0.174469	-0.0914153	-0.158244	-0.0152493	-0.137684	0.0751123	-0.021146	-0.115003	-0.245284	-0.109237	-0.141123	-0.174618	-0.0470405	0.0190171
189450	-0.0352906	-0.0356609	-0.0562771	-0.0892842	-0.10749	-0.0143168	-0.0557328	0.0542728	0.0180178	-0.022354	-0.0527197	-0.0953311	-0.059047	-0.0359887	-0.121333	-0.0349099	-0.0120473	-0.0285672	-0.0695832	-0.0345018	-0.0291915	-0.0222925	-0.0394357	0.0325722	-0.0524884	0.00362054	-0.108613	-0.088619	-0.0889834	-0.0534543	-0.0647136	-0.0629161	0.00921418	-0.0569781	-0.0942023	0.025955	-0.069817	-0.091453	0.0601396	-0.0231303	0.00886988	0.0262556	0.00184922	-0.116573	-0.0370688	-0.0679194	0.0153463	0.0188857	0.0111414
189652	-0.242611	-0.114209	-0.338464	-0.259543	-0.292147	-0.240451	-0.121801	-0.039787	-0.0142118	-0.285621	-0.273684	-0.417206	-0.215383	-0.0754605	-0.209505	-0.280698	-0.154759	-0.173819	-0.199165	-0.135738	-0.131638	-0.126337	-0.0406604	-0.015127	-0.386088	-0.235962	-0.212073	-0.363925	-0.0877332	0.0626891	-0.137822	0.0166778	0.0690838	0.0615267	0.0353843	-0.104685	-0.238964	-0.293569	-0.0890183	-0.0554919	-0.00573875	-0.258282	-0.109676	-0.287759	-0.215064	-0.341486	-0.219987	-0.188913	-0.157689
190031	-0.0898386	-0.0418229	-0.0126374	-0.0827222	-0.0745412	-0.0690879	-0.0442325	0.058356	0.012929	-0.00214399	-0.0233644	-0.043614	-0.0445365	-0.0603995	-0.0785963	-0.0342568	-0.0281074	-0.0416763	-0.0394751	-0.0447256	-0.0531064	-0.0934465	-0.0591844	-0.106236	-0.130969	-0.0227631	-0.035061	-0.0409491	-0.0373411	-0.0108951	-0.0444055	-0.048217	-0.0285101	-0.0458902	-0.0323481	0.00870375	-0.129191	-0.13351	-0.00612642	-0.0491993	-0.0141575	0.0309173	0.0442033	-0.0140261	-0.0762863	-0.0895954	0.0197138	-0.0129539	0.00708187
191033	-0.0367713	0.0736732	-0.110416	-0.0211205	-0.0101478	-0.0233311	0.00518266	0.0655981	0.0857691	-0.169393	-0.0593957	-0.168268	0.0173084	-0.190355	-0.239263	0.028523	-0.00741177	-0.00535453	-0.000499416	-0.0459096	-0.0050472	-0.0274306	0.0601727	0.0490754	-0.107019	-0.0708361	-0.371161	-0.201871	-0.335121	-0.135268	-0.17649	-0.24005	-0.0150406	-0.180622	-0.24269	0.00363648	0.0308761	-0.0684936	0.0345609	0.0556012	0.100919	0.0470665	0.0535647	-0.358348	-0.282325	-0.256094	-0.0255652	0.0384672	-0.0202244
191235	-0.122119	-0.0247258	-0.207682	-0.156077	-0.136371	-0.0325453	0.00854048	0.0370601	0.000622572	-0.114738	0.0194431	-0.0654905	-0.0830632	-0.159384	-0.263236	-0.0611256	-0.126007	0.0964425	-0.0566613	-0.0279336	-0.0192419	-0.00240466	-0.0425893	-0.123419	-0.182031	-0.124242	-0.339562	-0.380786	-0.241735	-0.017648	-0.119783	-0.163638	0.0940007	-0.083773	-0.169154	-0.0498482	-0.101604	-0.2572	-0.121744	-0.100911	0.02162	-0.143063	-0.0666013	-0.309172	-0.123576	-0.132823	-0.253909	-0.118195	-0.0907113
191336	-0.200528	-0.0615589	-0.136781	-0.0797707	-0.0399616	0.0220799	0.00492203	0.0886907	0.0840202	-0.199526	-0.244146	-0.232355	-0.130801	-0.203903	-0.232814	-0.068361	-0.0861942	-0.0403642	-0.0183239	-0.0821577	-0.0471058	-0.0308905	-0.15727	-0.118757	-0.166866	-0.104766	-0.220758	-0.0811166	-0.0521777	0.00456157	-0.108167	-0.146493	0.0761719	0.00680439	0.0470622	-0.0482511	-0.0312057	-0.293619	0.0204267	-0.00872894	0.0470377	-0.189227	-0.139522	-0.170125	-0.123662	-0.126191	0.0470183	-0.163555	-0.0965317
191437	-0.0502325	-0.00891781	-0.127985	-0.127625	-0.0950975	-0.0619531	-0.0687134	-0.0322996	0.0176042	-0.0190811	-0.168847	-0.169984	-0.086701	-0.156777	-0.371778	-0.0944091	-0.176247	-0.135589	-0.0909235	-0.0397508	-0.0249977	-0.0762092	0.00870017	-0.148962	-0.205732	-0.0334084	-0.229767	-0.46157	-0.138541	-0.0493449	-0.13442	-0.244323	-0.00314924	-0.159929	-0.161442	-0.0140861	-0.170067	-0.315994	-0.00657297	-0.0999657	-0.00304522	-0.118342	-0.0204358	-0.270492	-0.141886	-0.465029	-0.193521	-0.056861	-0.083645
191841	-0.126249	-0.0881231	-0.186166	-0.182347	-0.179345	-0.157322	-0.109323	0.0309942	-0.00977084	-0.16176	-0.146559	-0.149745	-0.200351	-0.104217	-0.109489	-0.223482	-0.0708603	-0.137756	-0.18789	-0.211663	-0.186836	-0.124877	-0.0865386	-0.114645	-0.184264	-0.340927	-0.170306	-0.23079	-0.00207903	0.0932619	0.0413425	-0.222841	0.0812204	-0.0980549	0.0063486	-0.231157	-0.24348	-0.234043	-0.0408456	-0.157472	-0.038899	-0.065651	-0.167601	-0.241642	-0.191237	-0.201294	-0.0876197	-0.146239	-0.0393219
191942	0.00335531	-0.0112582	-0.103919	-0.132735	-0.15219	-0.139873	-0.0840152	0.0308886	0.044805	-0.129766	-0.208642	-0.0320325	-0.108445	0.0282824	-0.189296	-0.120278	-0.0973383	-0.1908	-0.113255	-0.0813931	-0.165867	-0.09911	-0.0908166	-0.00031755	-0.181488	-0.0202756	-0.0542261	-0.148879	-0.0289428	0.0278284	0.0266129	-0.135059	0.0971871	0.0840192	0.0441619	-0.0277841	-0.0881145	-0.149847	-0.0186767	-0.0383452	0.0824269	0.0311748	-0.079231	-0.163239	-0.0983457	-0.0881154	-0.0170396	-0.144356	0.0195353
192035	-0.00282304	-0.0466825	0.00325544	0.0331373	0.0262544	0.0683192	0.141368	-0.0807485	-0.072957	0.039541	0.0281554	0.0666402	0.078018	-0.224562	-0.273893	0.109605	0.0585691	-0.00012837	0.0672445	0.0864581	-0.00986009	0.0329526	-0.0566664	-0.0476404	-0.161711	-0.0594467	-0.315602	-0.177994	-0.245279	-0.263541	-0.263701	-0.0866322	-0.13059	-0.213914	-0.220449	-0.0953219	-0.0413269	-0.0939917	0.00440836	-0.0598104	0.0703148	0.0436255	0.0718726	-0.147717	-0.262547	-0.0190014	-0.11855	-0.0682871	-0.0269377
192136	-0.221398	0.0323221	-0.235529	-0.189773	-0.168806	-0.09746	-0.0902617	0.0824439	0.0576587	-0.0961998	-0.0550204	-0.163688	-0.176635	-0.101675	-0.178609	-0.0775408	0.0648686	0.0165988	-0.124685	0.0211419	-0.0166744	-0.0188789	0.0330496	-0.085078	-0.103028	-0.0916111	-0.153293	-0.0363709	-0.175653	0.0826545	-0.0275072	-0.0693595	0.0968205	-0.00418099	0.0063988	0.0162194	-0.147781	-0.163028	-0.051876	0.00344469	0.0481471	-0.0175982	-0.0532296	-0.0904252	-0.108727	-0.200284	0.0323383	0.0228648	-0.0545172
192237	0.0232003	0.136996	-0.263796	0.0888566	0.0820658	0.101708	0.111116	0.208836	0.218547	-0.0440825	-0.197929	-0.235492	0.0488944	-0.283434	-0.446713	0.0648033	-0.0402468	-0.0606984	0.144747	0.0731223	0.06534	0.0917296	0.133323	0.0951459	0.0023341	-0.0477082	-0.29716	-0.175636	-0.223881	-0.130461	-0.113064	-0.320423	-0.0564409	-0.138197	-0.128227	-0.0622875	-0.216754	-0.434616	0.0402581	0.0216154	0.176263	0.0241564	0.0358016	-0.229199	-0.230738	-0.297646	-0.101061	-0.176669	-0.110856
192439	-0.00399343	0.046746	-0.0368724	0.0452955	0.0356739	-0.016413	0.0288274	0.0540187	0.066528	-0.0662763	-0.0771504	-0.126447	0.0462465	-0.0962714	-0.163985	-0.0193835	-0.0583167	0.0150922	0.0282732	0.0244222	0.0402071	-0.0143022	0.0696409	0.0107793	-0.0912948	-0.0748069	-0.0546189	-0.182207	-0.0294493	-0.0203711	-0.0806948	-0.119986	0.00291058	-0.0119785	-0.0476014	0.0758356	-0.0554992	-0.0996103	0.0557117	0.0197302	-0.00204594	0.0683724	-0.0109345	-0.120837	-0.0289581	-0.150902	0.0607434	-0.0576859	0.109077
192540	0.0185329	-0.0378739	-0.086599	0.0333143	-0.0306632	-0.0659246	-0.0448184	-0.00677913	-0.0357402	-0.192085	-0.0946165	-0.0989488	-0.0450531	0.056432	-0.0658735	-0.101439	-0.134663	-0.0219176	-0.0828346	-0.0844194	-0.00852538	-0.0267107	0.0325225	-0.0446894	-0.11449	-0.0431367	-0.154552	-0.100771	-0.0383598	0.129158	0.0887566	-0.0548575	0.0774692	0.0721557	0.0856425	-0.0931168	-0.137662	-0.16809	0.0490347	-0.0809917	0.00901398	0.0256228	-0.077644	-0.175768	-0.137825	-0.131927	-0.0522984	-0.0441578	-0.0566885
192641	-0.213779	0.00257023	-0.126571	-0.1501	-0.170434	-0.137559	-0.0937387	0.0890922	0.105525	-0.03118	-0.153979	-0.294568	-0.117595	-0.239016	-0.328906	-0.139135	-0.159893	-0.0407597	-0.117493	-0.0989042	-0.0346386	-0.111603	-0.00341044	-0.00776358	-0.141243	-0.0954406	-0.186035	-0.0998563	-0.0186806	-0.0810863	-0.0397076	-0.306764	-0.0260006	-0.0867693	-0.110171	-0.0756925	-0.130879	-0.226169	-0.0834977	-0.0821907	-0.0318653	-0.060985	-0.0309154	-0.143728	-0.0905104	-0.0951182	-0.0631637	-0.0908196	-0.0429381
192843	-0.0204176	-0.0942197	-0.109445	-0.128222	-0.133499	-0.0645431	-0.102113	-0.075633	-0.0908836	-0.175693	-0.0846026	-0.13651	-0.0861153	0.0564436	-0.0871194	-0.102516	-0.119882	-0.0855791	-0.0829823	-0.0568932	-0.0509282	-0.0894883	-0.0694	-0.0195556	-0.107941	-0.0893087	-0.0621521	-0.093116	0.0604961	0.0891175	-0.013611	-0.0112593	0.0909557	-0.017167	0.0327167	-0.0784578	-0.0628954	-0.181997	-0.0464849	-0.083028	-0.00976287	-0.116206	-0.13777	-0.189452	-0.100854	-0.0584294	-0.138308	-0.0471827	-0.103084
193239	0.00557115	-0.0328131	0.0112879	0.00861268	-0.0542908	-0.0873627	-0.117594	0.0319472	0.0514916	-0.0313721	-0.0195221	0.00790152	-0.0384126	-0.058244	-0.144058	-0.0598869	-0.0900828	-0.142273	-0.0702271	-0.052425	-0.0824478	-0.0622025	-0.0113897	-0.00708609	-0.0517857	-0.0248843	-0.158766	-0.105996	-0.121857	-0.086004	-0.0352243	-0.0471	-0.0695959	-0.104125	-0.138551	-0.0349417	0.0344876	-0.0510439	-0.0567471	-0.0333533	-0.0329408	-0.00112931	0.014045	-0.116303	0.00791625	-0.0495782	-0.00749454	-0.00543413	-0.162287
193845	-0.119595	0.0539811	-0.102503	-0.168892	-0.0999312	-0.0284438	-0.0789121	0.0973004	0.104144	-0.168542	-0.116616	-0.190849	-0.101688	-0.0337261	-0.194978	-0.0384311	-0.0846018	-0.0107485	-0.122781	-0.0406091	-0.0204324	-0.0297563	0.101743	-0.0368604	-0.201882	-0.187622	-0.122958	0.0190382	-0.0753036	-0.0394699	0.0971122	-0.0932662	0.0692173	0.00568146	-0.0578089	0.0118484	-0.0806137	-0.190807	-0.012949	0.0150326	-0.0415989	-0.00923021	-0.0704917	-0.196168	-0.171391	-0.164363	-0.0505746	-0.0564963	0.00879688
194140	-0.134888	-0.0878887	-0.16341	-0.21592	-0.168146	-0.12409	-0.0872709	-0.0511237	-0.0948845	-0.0513521	-0.00797907	-0.0340096	-0.130029	-0.0504408	-0.0267515	-0.177779	-0.0937322	-0.0972922	-0.0858978	-0.0855776	-0.101863	-0.0979101	-0.10501	0.00540188	-0.0438467	-0.0679891	-0.0465883	-0.0573847	-0.0204774	0.0602035	-0.0563044	-0.0572419	0.0469615	0.0633387	0.00553242	-0.0719583	-0.0208415	-0.0125671	-0.105758	-0.0453463	-0.0387806	-0.0321356	0.00880846	-0.12011	-0.0535028	-0.0384	-0.0709455	-0.0416474	-0.109714
194443	-0.0964483	0.0199354	-0.0949728	-0.0749158	-0.086577	-0.0489076	-0.109945	-0.0331356	0.00274058	-0.0891729	-0.0758834	-0.151233	-0.046575	-0.0236216	-0.168402	0.00237866	-0.0994752	-0.143447	-0.0316539	-0.0299004	-0.029686	-0.0802684	-0.0574292	-0.105934	-0.197762	-0.123381	-0.156407	-0.200903	-0.0803914	0.0473837	0.0479229	-0.132195	0.0449391	-0.0308033	-0.124334	-0.120275	-0.0610261	-0.184143	-0.0370633	-0.151451	-0.0650276	-0.017673	-0.0646411	-0.206269	-0.140244	-0.173284	0.0342996	0.0121765	-0.0174529
194645	-0.00503123	0.0127318	-0.0693032	-0.0561708	-0.0388892	-0.0180614	-0.0364588	-0.0185017	-0.0178182	-0.0953117	-0.03234	0.0441899	0.00748959	-0.166069	-0.202786	-0.017052	-0.0168691	0.0103579	-0.0298263	0.0464116	-0.0113275	-0.0403961	0.0403278	-0.0717414	-0.0864386	-0.0300951	-0.0295271	-0.0492802	-0.101747	0.043095	-0.126635	-0.185868	0.017785	-0.0801579	-0.125385	-0.0612637	-0.123228	-0.167091	-0.0234239	-0.0748601	0.00125407	0.0158401	-0.054691	-0.116472	-0.0399621	-0.0424092	-0.0904036	-0.1351	-0.0438786
194746	-0.0213648	-0.0428162	-0.060766	-0.0182965	-0.0640185	0.00436709	-0.0137629	0.00693792	0.0553025	-0.115573	-0.0402897	-0.102004	-0.0178866	-0.0240245	-0.109252	-0.0285358	-0.0999397	-0.0549358	-0.037524	-0.0276051	-0.0134671	-0.00442451	-0.0103838	-0.0232944	0.0184015	-0.0849893	-0.188805	-0.0925179	-0.019282	0.00438835	0.0385864	-0.18097	0.0379237	-0.108074	-0.0500171	-0.149182	-0.157903	-0.212101	-0.113078	-0.152716	0.000269695	-0.0692919	-0.0452833	-0.176337	-0.223444	-0.25365	-0.0489142	-0.0718707	-0.0746016
194847	-0.0988674	0.0350247	-0.187246	-0.121341	-0.0625737	-0.0273499	-0.110435	-0.0302037	-0.03384	-0.0812187	-0.0977407	-0.120097	-0.0381691	-0.171533	-0.236712	-0.0421691	-0.0922314	-0.0736823	0.00660239	-0.00247307	0.00828471	0.0133679	0.120746	-0.0937106	-0.213623	-0.0678723	-0.12128	0.0338029	-0.234435	0.0184649	-0.134222	-0.205133	0.0325453	-0.122186	-0.0991573	-0.129501	-0.262405	-0.284099	-0.13409	0.00855183	-0.123886	-0.074342	-0.0874284	-0.245197	-0.256595	-0.264888	-0.122535	-0.0835153	0.050256
195041	0.0243733	-0.00166101	-0.0510909	-0.0305054	0.0628779	0.179558	0.0432506	0.121648	0.201616	-0.351765	-0.266015	-0.418215	0.103714	-0.240357	-0.189151	0.0661566	-0.273874	-0.058718	0.0956435	0.112299	0.136955	0.047898	0.0558308	0.0471278	-0.321353	-0.232984	-0.15336	-0.283696	-0.186023	-0.0708422	-0.23899	-0.222204	-0.236621	-0.151139	-0.207528	-0.0727394	-0.091328	-0.261056	-0.046757	-0.0691234	0.10766	0.0113667	-0.0503983	-0.421577	-0.225396	-0.401719	-0.135004	-0.0796278	-0.0611681
195445	-0.0983766	-0.12813	-0.167357	-0.140876	-0.147181	-0.155334	-0.171856	0.025009	-0.00311051	-0.180047	-0.124463	-0.034772	-0.0956896	-0.170724	-0.120189	-0.172206	-0.117106	-0.266014	-0.183427	-0.1668	-0.129179	-0.133823	-0.17805	-0.00753934	-0.174084	-0.0481734	-0.142447	-0.162863	0.0140538	0.0560471	-0.0560753	-0.0274942	-0.000278508	0.0155878	-0.0174946	-0.100935	-0.199189	-0.17775	-0.114114	-0.00506321	-0.0582459	-0.222651	-0.110583	-0.20388	-0.222801	-0.291233	-0.174457	-0.171309	-0.256136
195647	-0.0840325	-0.034885	-0.129033	-0.0773323	-0.105035	-0.00604597	-0.0567868	0.151837	0.144728	-0.335464	-0.155862	-0.438892	-0.0932344	-0.124239	-0.155502	-0.103035	0.0420651	0.00484896	-0.102828	-0.0251756	-0.0518495	0.0164072	-0.0214011	-0.0644453	-0.155116	-0.133305	-0.268378	-0.0925468	-0.0756459	-0.0495109	-0.0111948	-0.221453	-0.00579672	-0.0267833	-0.160961	-0.166223	-0.154715	-0.203979	0.111207	-0.00338566	-0.0157157	0.141913	-0.129407	-0.29776	-0.0869725	-0.0696703	0.0705803	-0.103122	0.0745851
195849	0.0130414	-0.0651401	-0.16416	0.0102951	0.0230563	0.0103514	-0.113236	0.0757977	0.161367	-0.147275	-0.0790252	0.0196998	-0.0553266	-0.190241	-0.284777	-0.0818259	-0.109194	0.207641	-0.0812582	0.0256163	0.142099	0.0657458	0.115191	-0.203193	-0.246672	-0.206378	-0.0401913	0.054604	-0.134247	-0.148963	-0.0675928	-0.469915	-0.0800458	-0.180585	-0.222727	-0.0570706	-0.0262861	-0.241818	0.0206303	0.0415217	0.129184	0.0656524	-0.0390191	-0.126372	-0.106771	-0.286786	-0.171934	0.0740162	0.139066
195950	-0.155386	-0.0603226	-0.177647	-0.125841	-0.0922405	-0.0595841	-0.0498003	0.0457699	0.0619325	-0.155702	-0.110664	-0.342418	-0.148605	-0.0413456	-0.227946	-0.0859229	-0.0274505	-0.087042	-0.0156519	-0.00188032	0.0309584	-0.0596954	-0.0552991	0.000995819	-0.304444	0.00750811	-0.299404	-0.258295	-0.266128	0.0107394	-0.0843695	-0.0955497	0.00799097	0.0207084	-0.0184634	-0.138321	-0.150257	-0.228878	-0.11461	-0.116759	-0.0342444	-0.0834618	-0.0642968	-0.212239	-0.307029	-0.162172	-0.117446	-0.0399716	-0.0867884
196144	-0.214046	0.0908465	-0.000389001	0.0442775	0.0476413	0.00708313	0.0224517	0.197061	0.227438	-0.237849	-0.192696	-0.201975	0.0493571	-0.13693	-0.132063	-0.021353	-2.17719e-05	0.0186396	-0.0617033	0.0461103	-0.0194504	-0.0061706	0.161	-0.137732	-0.184672	-0.123616	-0.168176	-0.0916695	-0.00924332	0.00166861	0.0855182	-0.323329	0.00147439	-0.086913	-0.183331	-0.139094	-0.264695	-0.267665	-0.201301	-0.186055	-0.159108	-0.0952138	-0.199119	-0.305377	-0.264422	-0.394612	-0.265639	-0.043661	-0.135164
196346	-0.112351	-0.00482675	-0.197916	-0.111003	-0.104844	-0.039258	-0.0405356	0.0501883	0.0563906	-0.0202339	0.022027	-0.0180003	-0.0721089	-0.062082	-0.141765	-0.0267413	0.0448113	-0.0353779	-0.0322557	-0.0279413	-0.0332963	0.0265207	0.00536973	-0.00814383	-0.0267083	-0.0507145	-0.174853	-0.0103751	-0.0750357	-0.0215105	0.0484873	-0.0799091	0.0311891	-0.0634092	-0.121706	-0.115248	-0.0313646	-0.067175	-0.0787051	0.0298597	-0.030201	0.0343385	0.0113465	-0.0852889	-0.100455	-0.0630915	-0.105136	0.00862472	-0.0965633
196750	-0.0565407	0.0342566	-0.0892827	-0.0588276	-0.0665371	-0.00872585	0.0210657	0.0189008	0.010314	-0.00151964	-0.244681	-0.331753	-0.0158409	-0.231685	-0.26277	-0.130472	-0.136288	0.00499743	0.0427886	0.053217	0.0561925	-0.0884749	0.0775779	0.105264	-0.0924046	-0.0429699	-0.0256098	-0.251076	-0.189028	-0.280784	-0.160601	-0.0498384	-0.198043	-0.136344	-0.324125	0.0861715	0.125252	0.043353	0.0402037	0.0875655	0.101641	0.0320064	0.0608227	-0.0507515	-0.0189068	-0.291345	-0.115235	-0.0539312	0.0469596
197348	-0.225426	-0.151406	-0.255378	-0.213281	-0.266042	-0.289076	-0.235167	-0.0641696	0.00972132	-0.306367	-0.211677	-0.314459	-0.30585	0.0516186	-0.131925	-0.377542	-0.123363	-0.259194	-0.208446	-0.232735	-0.236666	-0.123449	-0.0602371	0.0312526	-0.213757	-0.0185151	-0.0570335	-0.11972	-0.165408	0.0449932	0.0709649	-0.0213742	0.144759	0.119949	0.0428284	-0.0804975	-0.191856	-0.131539	-0.0977834	-0.138657	-0.0438765	-0.33037	-0.214747	-0.396034	-0.133483	-0.165569	-0.381363	-0.266979	-0.0524753
197550	-0.257645	-0.184676	-0.269226	-0.300643	-0.242614	-0.200051	-0.174444	0.0521174	0.0932727	-0.287024	-0.234737	-0.209939	-0.235006	-0.105037	-0.215729	-0.231724	-0.338864	-0.105511	-0.192888	-0.156025	-0.0412913	-0.0323486	-0.111383	0.0708339	-0.287229	-0.0424759	-0.22813	-0.20946	0.0079667	0.110519	-0.0432193	-0.0795757	0.145178	0.0666425	0.033261	-0.117473	-0.30874	-0.238094	0.0603816	-0.0454386	0.0334657	-0.26805	-0.200409	-0.193676	-0.181114	-0.243527	-0.292783	-0.252979	-0.193808
198047	0.0380825	-0.0125008	-0.105789	0.0754688	0.101782	0.0200064	0.0848755	0.0614722	0.0356408	0.0827233	-0.0731704	-0.0260068	0.0662107	-0.141065	-0.140585	0.0556698	-0.0475301	0.0210728	0.0434106	0.0249264	-0.0162948	0.014819	-0.0183567	-0.0166145	-0.0566303	-0.0389057	-0.182216	-0.0454772	-0.148561	-0.123062	-0.0964806	-0.184005	-0.126159	-0.0763511	-0.062396	-0.0432556	-0.00103438	-0.0629875	0.045987	-0.116639	0.0014234	0.0348545	0.0119462	-0.19392	-0.0976429	-0.134002	0.0679188	-0.0379742	0.0151127
198249	-0.0878242	0.0381483	0.0282113	0.00871949	0.0420682	0.0727482	0.0144761	-0.00204386	-0.00934045	-0.112145	-0.0948177	-0.206881	0.0199722	0.0410139	-0.0361976	0.0335677	0.0139217	0.0469832	0.0443449	0.0558634	0.0790963	0.0489998	0.0539	-0.014256	-0.0184223	-0.154524	-0.11066	-0.0784517	-0.1354	-0.0945492	0.0234821	0.0213435	0.0695427	0.00191022	-0.00965693	0.0254321	0.00714446	-0.0227989	-0.00732481	0.0240557	0.00129777	0.0143443	-0.0907758	-0.187171	-0.0576603	-0.0714439	-0.0344345	0.0699158	-0.0960525
198350	-0.0153364	-0.0520883	-0.100116	-0.0289297	-0.0302139	0.0289434	-0.0161481	-0.0276677	-0.0223817	-0.0255322	-0.0571061	-0.0344079	-0.0472131	-0.0746222	-0.0870254	-0.0428291	-0.0601651	-0.0584415	-0.00495691	-0.0170084	-0.0536106	-0.0140638	-0.0721119	0.0132132	-0.095457	-0.0125702	-0.0869242	-0.0314345	-0.0691705	0.00606102	-0.0197676	0.00367156	-0.012541	-0.00883683	-0.0185498	-0.0507385	-0.127149	-0.147084	-0.0132451	-0.0298944	-0.0169667	-0.0110908	-0.0484776	-0.126445	-0.112609	-0.079247	-0.0354643	-0.00835654	-0.0477875
198451	-0.0642238	-0.0300902	-0.239299	-0.0980977	-0.0516236	-0.154258	-0.0716189	0.0687399	0.091102	-0.113548	-0.0971925	-0.192226	-0.0744629	-0.259326	-0.300575	-0.0891565	-0.0756544	-0.0310555	-0.0779533	-0.0668734	-0.0278721	0.0095824	0.0160489	-0.0591511	-0.310416	-0.125985	-0.194811	-0.142656	0.03903	-0.0487758	-0.134741	-0.240829	-0.0355406	-0.213182	-0.156407	-0.0267119	0.00535148	-0.141071	0.0877312	-0.0716362	0.0581322	0.0116866	-0.0989915	-0.0819209	-0.0194809	-0.0658397	-0.020827	-0.010577	-0.0353201
198653	-0.0160944	-0.0474746	-0.113249	-0.0569271	-0.0462944	-0.0411807	-0.0331718	-0.042072	-0.0579186	-0.105848	-0.0842201	-0.110884	-0.0756656	0.00443891	-0.0285912	-0.1021	-0.133064	-0.0486148	-0.0925169	-0.0397606	-0.0421218	-0.0379863	-0.0586103	-0.0429468	-0.0860026	0.00899699	-0.112011	-0.162372	-0.0405205	0.0280478	-0.0183958	0.011709	0.0751699	0.0533728	0.0346328	-0.0212463	-0.0566371	-0.095107	0.0270287	-0.0580342	0.0240492	-0.0730445	-0.0783772	-0.0786224	-0.0673771	-0.0733096	-0.147795	-0.104198	-0.107841
198855	-0.173423	-0.0565548	-0.308257	-0.162956	-0.168902	-0.0796944	-0.0235257	0.0484678	-0.000327899	-0.183203	-0.0812064	-0.24702	-0.160816	-0.0929246	-0.230631	-0.138656	-0.0524398	-0.06985	-0.146935	-0.082482	-0.0291109	-0.0376157	-0.0321296	-0.163226	-0.142949	-0.18357	-0.138053	-0.0897052	-0.112935	-0.00581441	-0.0492556	-0.0952538	0.0843203	0.075071	0.00805042	-0.138909	-0.314872	-0.244286	-0.00626661	-0.0903101	-0.00572198	0.00153984	-0.0648643	-0.16435	-0.132563	-0.0670312	-0.037373	-0.128271	-0.0929883
199150	-0.0796566	-0.0559848	-0.154592	-0.197873	-0.155708	-0.0931852	-0.135789	-0.0384424	-0.045078	-0.108282	-0.0567362	-0.0503125	-0.111318	-0.0554106	-0.0878481	-0.107916	-0.126719	-0.113345	-0.102366	-0.099295	-0.00765723	-0.0863917	-0.0626275	-0.0467257	-0.0567118	0.0170529	-0.067883	-0.0330377	-0.0473021	-0.0296061	-0.133169	-0.0125575	-0.00533918	-0.0311001	-0.0469829	-0.0433118	-0.0579308	-0.0574668	-0.0381543	-0.112759	-0.0226257	0.0280429	-0.0896752	-0.0623143	-0.0085648	-0.0872165	-0.0349838	-0.0551451	-0.0514366
199251	-0.1494	-0.136679	0.188397	-0.0583236	-0.0276943	-0.111091	-0.226297	0.226625	0.271053	-0.30488	-0.281395	-0.33417	-0.0018228	-0.108157	0.187607	-0.0971503	-0.119596	-0.268197	-0.0731728	-0.063078	-0.00851947	-0.106133	-0.0419593	0.00534405	-0.345627	-0.102648	-0.0781698	-0.143514	0.127034	0.220949	0.0831162	-0.123532	0.164496	-0.0987655	0.0294353	0.172795	-0.22712	-0.255602	0.02334	0.170723	0.0638838	-0.0425287	-0.0946755	-0.368765	-0.268743	-0.267154	-0.156173	-0.0144751	-0.245145
199352	-0.0843691	-0.0547935	-0.0832066	-0.0803916	-0.110756	-0.1106	-0.105725	-0.00343607	-0.0212391	-0.102827	-0.0939605	-0.0931516	-0.0843379	-0.085888	-0.0742723	-0.133659	-0.103539	-0.0859831	-0.089749	-0.113545	-0.0823547	-0.109578	-0.081032	-0.0466952	-0.0425186	0.055712	-0.0261715	0.0463447	-0.0540839	-0.0136916	-0.105457	0.000393481	-0.00175267	0.00750818	-0.013705	-0.0416262	-0.0215976	-0.0455286	-0.0384742	0.014399	0.0509155	-0.0953337	0.00526047	-0.013145	-0.0557979	-0.111685	-0.147046	-0.153608	-0.0974941
199453	-0.0366299	-0.0419549	-0.0197021	-0.0807937	-0.070233	-0.00297421	-0.0681951	-0.00597441	0.013913	-0.104302	-0.0776932	-0.106072	-0.0373831	-0.0512688	-0.0557226	-0.0665564	-0.054057	-0.0635847	-0.0620771	-0.00532337	0.00248237	-0.00586588	-0.0194681	-0.00749181	-0.09332	-0.0445815	-0.0566395	-0.0987031	-0.0473717	0.0375499	-0.0372802	-0.0277646	0.0213863	0.0283564	0.00549009	-0.0342549	-0.0512783	-0.0719689	0.0181369	-0.00274938	-0.00382021	-0.000884815	-0.037531	-0.0945183	-0.0675687	-0.0490101	-0.0458304	-0.0643824	-0.0134609
199655	-0.063431	-0.048305	-0.239067	-0.187521	-0.209054	-0.135344	-0.137852	-0.179014	-0.167033	-0.133314	-0.179132	-0.310988	-0.245284	0.0162867	-0.10177	-0.188493	-0.147931	-0.155316	-0.135881	-0.0579817	-0.0694335	-0.0460593	-0.134777	-0.0692831	-0.180383	0.00507993	-0.00949002	-0.201285	0.130367	0.203461	0.120204	0.0798267	0.179752	0.120299	0.00395566	-0.259457	-0.201592	-0.13767	-0.173485	-0.15573	-0.115753	-0.215014	-0.219906	-0.121088	-0.165294	-0.276102	-0.220918	-0.123174	-0.207273
199958	-0.0304699	-0.0395688	-0.114416	-0.0578256	-0.085273	-0.116766	-0.0519977	-0.0154595	-0.00859913	-0.183432	-0.0694418	-0.127819	-0.0804432	-0.0031141	-0.0651542	-0.0455394	-0.0161101	-0.0818105	-0.0660936	-0.0848323	-0.0643046	-0.0865108	-0.0551142	0.0252695	-0.115386	-0.0690531	-0.0167045	-0.103588	0.018062	0.0362974	-0.0484106	-0.0214993	0.061366	0.0196708	0.0132818	-0.0583798	-0.175559	-0.146441	-0.0716967	-0.109755	-0.0127093	-0.0519194	-0.125305	-0.0396765	-0.0411782	-0.0100735	-0.121633	-0.0723699	-0.0036756
200008	-0.0436616	0.0524242	-0.145057	-0.0738812	-0.0880099	-0.00468017	-0.0312995	0.221453	0.202296	-0.195157	-0.195898	-0.427473	0.00721532	-0.265717	-0.404938	0.0449585	-0.12447	0.081425	0.111902	0.184705	0.0800929	0.0305495	0.134088	0.0434039	-0.156258	-0.119812	-0.130126	-0.0656949	-0.259433	-0.158005	-0.160539	-0.280581	-0.154896	-0.118513	-0.189353	-0.156131	-0.163866	-0.28176	0.0385918	0.0980546	0.0741725	0.104557	-0.0640762	-0.258126	-0.231423	-0.24433	0.0667474	-0.0277486	0.122915
200109	-0.0703151	0.0620518	0.00578333	-0.0989877	-0.0962147	-0.0912946	-0.0900348	0.0913289	0.107734	-0.284412	-0.178005	-0.217687	-0.062778	0.0409832	-0.0189421	-0.0108525	-0.157749	-0.12216	-0.0482944	-0.0434895	-0.0607369	-0.135527	-0.0836333	0.0140148	-0.179528	-0.163869	-0.155715	-0.0990673	-0.0825826	0.103492	0.0695418	-0.152547	0.0844302	0.0660417	0.0800754	-0.113908	-0.11392	-0.0822584	0.0550724	0.0952336	0.0900692	-0.0177668	-0.058367	-0.322535	-0.234836	-0.212167	-0.0958786	-0.206806	-0.250094
200311	-0.136332	-0.0144143	-0.315734	-0.214484	-0.12717	0.0876676	0.0437003	-0.0503372	-0.0612751	-0.0643129	-0.420174	-0.185457	-0.12174	-0.175465	-0.330023	-0.0451665	0.00970211	0.10832	0.0502839	0.0683296	0.0529252	0.00192596	-0.0675178	0.00723362	-0.114323	-0.170106	-0.382174	-0.00689355	-0.406041	-0.0499929	-0.10109	-0.127966	0.0629086	-0.0919259	-0.20841	-0.116996	-0.17979	-0.232854	-0.0610184	-0.0640832	-0.0176708	-0.105523	-0.0481606	-0.411721	-0.160737	-0.0632375	-0.064822	-0.00361151	-0.00472529
200513	0.00990701	0.0164207	-0.183029	0.00816065	0.0238339	0.0440914	0.0592975	-0.103704	-0.10987	-0.0671533	-0.114125	-0.17075	0.0275554	-0.0568133	-0.279129	0.0623579	0.134373	-0.175409	0.0487225	0.0358133	-0.0643287	0.0607039	0.083348	-0.046715	-0.00076546	-0.359157	-0.263468	-0.176706	-0.156902	-0.2227	-0.135223	-0.173751	-0.180013	-0.184824	-0.247918	-0.0650998	0.0832661	0.0704807	-0.145041	-0.00454719	-0.0093163	0.0188082	0.0139931	-0.137999	0.00161749	0.124187	0.0489574	0.0749916	0.0242769
200614	0.0106414	-0.0100172	0.0185383	0.00101595	0.0434398	-0.0013284	0.0548501	0.0433426	0.0202958	-0.0256936	0.0413301	-0.10591	0.031451	-0.0790364	-0.0642589	0.0542915	-0.0687208	-0.0729944	0.0354744	-0.00482229	-0.00552798	-0.0695936	0.0127789	0.080199	-0.0588018	-0.017013	-0.166562	-0.146114	-0.14536	-0.151136	-0.114368	-0.0724113	-0.1414	-0.1024	-0.172561	0.10609	0.0946062	-0.114513	0.0430978	0.102901	0.0209199	-0.0548112	0.0887857	-0.138817	-0.0203019	-0.0185568	-0.150869	-0.0914176	-0.159809
200917	-0.0608358	-0.0547807	-0.0134374	-0.0519275	-0.0658624	-0.0119104	0.000164468	0.126046	0.149822	-0.0183605	-0.0252424	-0.0170345	-0.0626153	-0.0967975	-0.125677	-0.0716614	0.0130436	0.0205115	-0.0520335	-0.0127131	-0.0312359	-0.0476139	0.00656199	0.0863617	-0.0223368	-0.0174145	-0.117312	0.0409044	-0.00568929	0.00954951	-0.0169998	-0.0974989	0.0454089	-0.0510655	-0.0205873	0.0112147	-0.170401	-0.144185	-0.0269269	-0.0308077	0.0502631	-0.0114065	-0.0294418	-0.0684115	-0.0938302	-0.0258334	0.0114254	0.0159631	-0.00422233
201111	-0.0299419	-0.0138235	0.000817488	0.00923742	-0.0489766	-0.0829336	-0.0614104	-0.107235	-0.075017	-0.212331	-0.115664	-0.149046	0.0289018	0.00846576	-0.00248336	-0.0905875	0.0065015	-0.163583	-0.0255095	-0.0550962	-0.140868	-0.0989372	-0.0577245	-0.0343916	-0.178958	-0.0199045	-0.152911	-0.0998431	-0.102898	-0.0369075	0.0344109	-0.0487602	0.000998341	0.0299176	-0.134597	-0.0938144	-0.0335662	-0.0927389	-0.0290552	-0.106052	-0.119764	-0.0361866	-0.0613502	-0.165138	-0.0450968	-0.0152785	-0.100548	-0.0720963	0.0111593
201414	-0.0795137	0.0169085	-0.0496615	-0.0218227	0.0785426	0.124278	0.158781	0.182855	0.190073	-0.253654	-0.0197422	-0.159897	0.0776309	-0.122821	-0.203967	0.0775319	0.117392	0.0458278	0.144942	-0.0349508	0.0260583	0.0730937	0.115424	-0.0203574	-0.0154915	-0.172872	-0.165139	0.00202512	-0.152774	-0.0520704	-0.0123602	-0.163296	-0.0129101	-0.036675	-0.0675365	0.00407611	-0.259659	-0.258756	0.118914	0.0208111	0.0292482	0.0224912	-0.223478	-0.287484	-0.150536	-0.236401	-0.152354	-0.087512	0.0727452
201515	-0.0739999	-0.0180505	-0.0963773	-0.0925556	-0.140141	-0.138291	-0.0987617	0.0231955	0.0141691	-0.116223	-0.117526	-0.172773	-0.0742652	-0.0193571	-0.144865	-0.0689337	-0.127128	-0.0138972	-0.0230444	-0.0249424	0.00505231	-0.104962	-0.0315942	-0.017473	-0.0648862	-0.0216848	-0.00960048	-0.0953237	4.24363e-05	0.028667	-0.0551603	-0.125075	0.0527541	-0.0480681	-0.0193907	-0.0510622	-0.139529	-0.111781	-0.0530511	-0.0770227	-0.00164909	-0.05622	-0.0321626	-0.14459	-0.133364	-0.186359	-0.0743943	-0.0483582	-0.0491211
201818	0.0514499	0.0579955	0.0498662	0.110822	0.0583942	-0.00970346	-0.108574	0.0104783	0.0404882	-0.0766129	0.03187	0.0621913	0.122211	-0.0152365	-0.0580602	0.0146679	-0.00899683	-0.205867	0.0113322	-0.00683662	-0.0011751	-0.235562	0.133771	-0.0525735	-0.149316	-0.0568999	-0.258575	-0.228094	-0.265314	-0.0566062	0.00348852	-0.110608	-0.0489949	-0.0194922	-0.0802981	-0.0950224	-0.178159	-0.236898	-0.112844	-0.135408	-0.0721013	-0.0150213	0.0626431	-0.287108	-0.319588	-0.128687	-0.259818	-0.1533	-0.0998085
202113	-0.124517	-0.069804	-0.214642	-0.166832	-0.191866	-0.123293	-0.0907511	0.0115965	0.0260105	-0.15217	-0.134565	-0.111307	-0.128751	-0.0110488	-0.0859002	-0.122491	-0.14317	-0.00816142	-0.172283	-0.10102	-0.116671	-0.12152	-0.0897499	-0.0742459	-0.106357	-0.0226455	-0.119949	-0.165522	0.0395724	-0.00974177	-0.141783	0.0175203	-0.014076	0.0402965	0.0137587	-0.0735715	-0.0708393	-0.0678917	0.0386659	3.19537e-05	-0.0113433	-0.00692453	-0.0173048	-0.0736402	-0.0662233	-0.052304	0.00227227	-0.0629839	-0.057532
202719	-0.250227	-0.0583338	-0.200614	-0.29822	-0.321062	-0.17737	-0.147081	0.0952346	0.102367	-0.327879	-0.11424	-0.251256	-0.251357	-0.0281025	-0.106552	-0.216498	-0.0784009	0.0606632	-0.222416	-0.13176	-0.0335194	-0.0996944	-0.0486254	-0.012542	0.050931	-0.300325	-0.0745597	-0.00425306	-0.115304	0.217927	0.145433	-0.184024	0.14478	0.132802	0.0316298	-0.0373396	-0.0127246	-0.119365	0.0102346	-0.019068	0.0063616	-0.0556363	-0.240592	-0.284187	-0.00460035	-0.243159	0.0297009	-0.0417696	-0.0151356
203418	-0.105641	-0.0655017	-0.202158	-0.150735	-0.0875712	-0.0829757	-0.0547235	0.0394271	0.0540687	-0.365867	-0.110532	-0.257759	-0.0183963	-0.171168	-0.193629	-0.0636302	-0.242144	-0.208265	-0.0754414	-0.0935557	-0.0676139	-0.157484	-0.091868	0.0536295	-0.156229	-0.130477	-0.308261	-0.165601	-0.063378	-0.108052	-0.0956524	-0.214265	-0.0566688	-0.120584	-0.237019	-0.154644	-0.0486496	-0.170969	-0.0632711	-0.0293156	-0.0119821	-0.0677963	-0.0041726	-0.265372	-0.237999	-0.29319	-0.18932	-0.0808627	-0.170774
203923	-0.0955355	0.0535894	-0.0902236	-0.148155	-0.131013	-0.0807115	-0.0250948	0.0636072	0.0716167	-0.0302738	-0.110699	-0.157796	-0.104831	-0.0135901	-0.082601	-0.0846859	-0.124092	-0.108916	-0.0956414	-0.0560081	-0.0606598	-0.104273	0.00723331	0.0429235	-0.124282	-0.0741917	-0.0940046	-0.207232	-0.00463116	0.0511619	0.056636	-0.11309	0.102932	-0.0150262	0.0377433	-0.025909	-0.0629924	-0.156177	-0.00761312	-0.000744194	0.0263272	0.00994219	0.0119493	-0.142494	-0.0929239	-0.107627	-0.00766159	-0.0668158	-0.0811915
204016	-0.174562	0.0314189	-0.247881	-0.18892	-0.142284	-0.0977999	-0.0859498	0.0563687	0.0877724	-0.149088	-0.0923797	0.0961816	-0.124131	-0.0817317	-0.233826	-0.254326	-0.16129	-0.0787922	-0.230204	-0.150947	-0.112007	-0.0248093	-0.110404	0.0227415	0.0948232	0.0592567	-0.337526	0.0190589	-0.237236	-0.0381765	-0.185605	-0.15122	0.000252335	-0.0632622	-0.146747	-0.21029	-0.195544	-0.187647	-0.0661345	-0.0413004	-0.0314709	-0.0891219	-0.0179564	-0.234388	-0.230274	-0.219108	-0.13654	-0.133159	-0.153693
204218	-0.0944504	-0.0736482	-0.160194	-0.184755	-0.171544	-0.080944	-0.0918566	0.128735	0.183655	-0.399236	-0.279843	-0.553277	-0.194026	-0.0251773	0.00525524	-0.115249	-0.212402	-0.070116	-0.040338	-0.0580318	-0.0641263	-0.120657	-0.051238	-0.0199738	-0.297003	-0.18436	-0.1126	0.0203264	-0.00447619	-0.0587486	-0.0228903	-0.139082	0.0542954	-0.0175539	-0.129376	-0.092018	-0.125619	-0.192938	0.00410936	0.0139536	0.143285	-0.128735	-0.10964	-0.11251	-0.244138	-0.28353	-0.117678	-0.182614	-0.172033
204319	-0.0486373	-0.0168996	-0.120765	-0.0914745	-0.0802353	-0.0751759	-0.0798724	0.0624685	0.0253973	-0.215749	-0.0661084	-0.173078	-0.0856805	-0.0962862	-0.101907	-0.131572	-0.14106	-0.0133182	-0.0899936	-0.0664749	-0.0611799	-0.013847	-0.0865419	-0.0254702	-0.129003	-0.0874699	-0.0796909	-0.127184	0.00258342	0.0158538	0.0166026	-0.0430799	0.0198707	0.000609818	0.00411608	-0.141182	-0.142006	-0.157409	-0.00594093	-0.0649403	0.0164972	-0.0027818	-0.0484368	-0.1156	-0.1947	-0.185157	-0.0303099	-0.0789414	-0.041226
204420	-0.0795231	-0.109852	-0.269114	-0.181778	-0.260681	-0.191208	-0.0937743	-0.0256469	0.0388209	-0.257187	-0.228536	-0.200987	-0.184386	-0.183258	-0.154938	-0.204856	-0.384744	-0.150107	-0.135659	-0.0720967	-0.138907	-0.142144	-0.128713	0.000970937	-0.260837	-0.11229	-0.19846	-0.150804	-0.0808267	-0.0111313	-0.106481	-0.00746486	0.0161607	0.0889829	0.0479859	-0.230248	-0.250624	-0.298721	-0.285073	-0.0363032	-0.106814	-0.269555	-0.163782	-0.245167	-0.344723	-0.200536	-0.27961	-0.106174	-0.283848
204521	0.0457984	0.0917308	-0.156736	-0.00974559	-0.0316434	-0.00074769	-0.0461593	0.0803433	0.0930529	-0.220562	-0.0680306	-0.200641	0.106601	-0.283415	-0.320865	-0.037899	-0.233133	-0.285781	-0.0547997	-0.035993	0.0247505	0.0201738	-0.171071	-0.00209096	-0.286076	-0.164486	-0.288183	-0.25012	-0.196887	-0.339858	-0.266837	-0.205185	-0.303418	-0.247918	-0.305172	-0.118685	-0.0669412	-0.137375	-0.0613491	-0.0182398	0.0348319	-0.124006	-0.0132801	-0.359767	-0.184117	-0.188064	-0.162775	-0.114096	-0.0701264
204622	-0.0201252	0.0364796	-0.036931	-0.04477	-0.0255599	-0.0192038	-0.0632425	-0.0211269	-0.038201	-0.0996119	-0.0438948	0.00511076	0.000875405	-0.0580069	-0.0601279	-0.0527828	-0.138615	-0.0440597	-0.0247984	-0.0514114	-0.0338424	-0.00989058	-0.027423	0.0588887	-0.096198	-0.0743348	-0.135116	0.00246118	-0.133724	-0.113846	-0.0248138	-0.0909659	-0.057713	-0.0373885	-0.0578028	-0.0574653	-0.081442	-0.0458954	-0.105236	-0.0435466	0.00910506	-0.0728802	-0.0288672	-0.0614104	-0.157068	-0.111876	-0.121746	-0.0581292	-0.126598
205119	0.0476124	-0.00244053	-0.14302	-0.0568245	-0.102513	-0.0519245	-0.0477128	-0.142138	-0.139555	-0.183887	0.0146785	-0.0941126	-0.0730952	0.0332451	-0.0328062	-0.0961637	-0.00995008	0.00278409	-0.0678395	0.00675155	-0.000145944	-0.0245575	-0.0170853	0.0174116	-0.168297	-0.0853874	-0.074721	-0.108501	-0.148839	-0.0780913	0.034583	-0.058872	0.0100141	-0.0557128	-0.165994	-0.127964	-0.0246498	0.0740762	-0.101522	-0.118331	-0.0578764	-0.00173098	0.0343944	-0.0333607	0.014375	0.0557331	-0.0316312	-0.0306942	-0.0763759
205220	-0.207286	-0.0380125	-0.237243	-0.217534	-0.186583	-0.0931141	-0.147675	0.0612362	0.00219208	-0.119825	-0.0870701	-0.101501	-0.160004	-0.0973103	-0.182943	-0.0235875	-0.0406669	-0.0827233	-0.0737636	-0.115441	-0.0636666	-0.0782992	-0.0144226	-0.124754	-0.0416089	0.0781059	-0.187468	-0.0596984	-0.222255	0.0447809	-0.078771	-0.1045	0.103091	0.0595413	0.0269235	-0.0708663	-0.177665	-0.23062	-0.013597	-0.143921	0.00429338	-0.0473307	-0.0302732	-0.101518	-0.233154	-0.146961	-0.0119795	-0.176836	-0.072922
205725	0.03242	-0.000765247	-0.0439433	-0.00937862	-0.0542927	-0.141531	-0.0501387	-0.0743469	-0.0623115	-0.235726	-0.117915	-0.218328	-0.080115	-0.0203412	-0.0769322	-0.162324	-0.105043	-0.227865	-0.109016	-0.0863822	-0.0857661	-0.117593	-0.0457126	-0.0694294	-0.194936	-0.172694	-0.116449	-0.0781616	-0.085057	-0.0205215	-0.0371346	-0.0901649	-0.0847822	0.0624771	-0.0395437	-0.0765701	-0.0505654	-0.0530752	-0.0644277	-0.0543355	-0.020607	0.00543842	0.0187131	-0.160871	-0.203951	-0.109056	-0.190988	-0.00976437	-0.0516841
205826	-0.0153812	-0.0584676	-0.147439	-0.0632446	-0.163609	-0.121902	-0.0764265	-0.0395873	-0.0296473	-0.0485678	-0.0769982	-0.157702	-0.160271	-0.0319712	-0.0850592	-0.171718	-0.0368973	-0.131247	-0.0997518	-0.146429	-0.143069	-0.0782377	-0.0654604	-0.105588	-0.34567	-0.244381	-0.108117	-0.218817	-0.0227538	0.0549585	0.0887657	-0.380939	-0.0665547	-0.054243	-0.186574	-0.0729799	-0.102247	-0.257719	-0.145118	-0.191139	-0.0164915	-0.0885765	-0.138194	-0.243776	-0.120507	-0.131653	-0.173916	-0.124375	-0.0048501
206222	-0.0481366	-0.000719656	-0.0746433	-0.0708849	-0.0164859	0.00376366	-0.00572153	-0.0081543	0.0386802	-0.206974	-0.109425	-0.203396	-0.0701164	-0.130222	-0.144091	-0.0237078	-0.0781995	0.00155139	-0.055909	-0.00414707	0.00818119	0.0011826	0.00186022	0.0050355	-0.0892498	-0.0416051	-0.144694	-0.0995425	-0.159879	0.00688559	-0.164389	-0.197851	6.625e-05	0.0130816	-0.0891399	-0.075862	-0.0799202	-0.149585	-0.035433	-0.0444741	-0.0181761	0.00451609	-0.13317	-0.156658	-0.161593	-0.20187	-0.137149	-0.0102999	-0.105097
206323	-0.101919	-0.00795849	0.0694048	-0.090225	-0.0122567	-0.0355961	0.119561	0.116938	0.142013	-0.30033	-0.0720856	-0.328292	-0.0950336	-0.199802	-0.131924	0.0341067	-0.125516	-0.0773988	0.0440001	-0.0763401	-0.0614112	-0.0523341	0.166619	-0.00274379	-0.270527	-0.11465	-0.256744	-0.188788	-0.119182	-0.0268962	-0.0562105	-0.255022	-0.0331559	-0.135624	-0.156427	0.081143	-0.125871	-0.16589	0.0343059	-0.0205913	-0.0582416	-0.0441489	-0.211298	-0.441307	-0.386559	-0.193024	-0.314216	-0.204315	-0.229257
206525	-0.0705445	0.0257411	0.0532584	-0.0465419	-0.0777191	-0.107973	-0.0651995	0.066859	0.0802929	-0.102521	-0.0806369	-0.136082	-0.00604955	0.0225908	0.0135249	-0.0542704	-0.0954433	-0.132507	-0.022601	-0.08254	-0.0792652	-0.120927	0.0115786	0.0793006	-0.0457248	0.0238173	-0.115495	-0.0338658	-0.0976465	-0.0342589	0.0387721	0.0486174	0.0245861	-0.0274822	-0.0632003	0.0830683	0.0743509	0.016683	0.0352148	0.102429	0.0279843	0.0667871	0.0446137	-0.134712	-0.0370607	-0.115452	0.0394733	0.00160738	0.0291761
206727	-0.0931889	-0.0026294	-0.125714	-0.0861072	-0.0519738	-0.0752916	-0.0281132	0.124176	0.110276	-0.0672819	-0.117214	-0.148977	-0.0981972	-0.0155179	-0.0258247	-0.0997856	-0.0624781	-0.0648617	-0.0785067	-0.0733964	-0.0868594	-0.0980057	-0.0700662	0.0682289	-0.245596	-0.138121	-0.0888846	-0.242344	-0.144634	-0.0257056	-0.0236122	-0.0929033	-0.00687866	-0.0172487	-0.0997756	0.00556631	-0.0861293	-0.0257228	-0.0126543	-0.0114895	0.0957177	-0.0255304	0.0429912	-0.0981466	-0.145988	-0.123645	0.00920894	0.0428019	-0.101653
206828	-0.110691	0.178792	0.000316331	-0.0560424	-0.0521966	-0.1158	-0.0339431	0.116395	0.125907	-0.143575	-0.300283	-0.306489	-0.132055	-0.207878	-0.0467729	-0.107331	-0.0191287	-0.0157303	-0.0476716	-0.0296359	-0.0430914	-0.049308	0.063952	-0.054233	-0.230316	-0.12491	-0.0188155	0.0523641	-0.239208	0.0160701	0.137099	-0.234671	-0.162773	-0.0486552	-0.096085	-0.174292	-0.264078	-0.356736	-0.0569229	-0.309075	-0.283237	-0.123976	-0.13878	-0.139091	-0.100581	-0.0977479	-0.208574	-0.261887	-0.0625553
206929	-0.161947	-0.0954684	-0.106939	-0.127663	-0.106634	-0.0602036	-0.0238256	0.0286339	0.0250604	-0.104751	-0.141107	-0.168602	-0.129028	-0.147436	-0.166149	-0.0973123	-0.00177043	0.0376629	-0.159415	-0.0569111	-0.0143985	-0.0247169	0.0030714	-0.0678336	-0.113635	0.0808866	0.0786346	0.073629	-0.086996	0.0271046	-0.0908471	-0.100915	0.0563942	-0.0412396	-0.0394062	-0.0704724	-0.189963	-0.228644	-0.0466449	-0.0138002	-0.0156701	-0.12085	-0.102093	-0.109445	-0.121628	-0.217262	-0.0416547	-0.154961	-0.032008
207123	-0.038391	-0.00533947	0.029716	0.0297672	0.00940977	0.0221025	-0.00728178	0.110163	0.118465	0.0204737	-0.200298	-0.217428	0.0149018	-0.180746	-0.263102	0.00767503	-0.197628	0.00375579	0.0469541	0.0404267	-0.00306833	0.0174275	0.103327	0.0488343	-0.174483	-0.0321534	-0.235646	-0.00680106	-0.124496	-0.0854912	-0.0744902	-0.180693	-0.0199971	-0.0424911	-0.134112	0.00432515	-0.185552	-0.239965	0.0374875	0.0277817	0.0338082	-0.0242076	0.0295245	-0.14793	-0.212237	-0.263835	-0.0854721	-0.13524	-0.0158908
207426	-0.0138141	-0.0447835	-0.0620839	-0.0153577	-0.0445569	-0.0341488	-0.0634009	0.030082	0.0215554	-0.20275	-0.161862	-0.340723	-0.00760264	-0.0152833	-0.131966	-0.0682271	-0.0222494	-0.085286	-0.0455086	-0.0339398	-0.0097184	-0.0249487	-0.0192282	0.022829	-0.154848	-0.0891209	-0.146895	-0.103052	-0.0718256	-0.0250605	0.0220224	-0.145116	0.0331047	-0.0986535	-0.0384187	-0.0967674	-0.097382	-0.143149	-0.0114999	-0.0682655	-0.00879344	-0.0793862	-0.0816334	-0.196958	-0.147894	-0.183368	-0.265521	-0.0506219	-0.0844946
208024	-0.0251952	-0.0327452	-0.0807745	-0.0656994	-0.0809496	-0.0556534	-0.0809557	-0.0133794	-0.00589225	-0.102286	-0.183947	-0.12946	-0.0562836	-0.144519	-0.173888	-0.0905811	-0.0209944	-0.0670265	-0.0210391	-0.0378422	-0.0684903	-0.0673419	-0.0531629	-0.0206807	-0.158836	0.0192393	-0.11268	-0.0229229	-0.174162	-0.154056	-0.0247292	-0.0611044	-0.0722694	-0.117967	-0.237199	-0.110359	-0.045138	-0.0358451	-0.101529	0.0089021	-0.0301317	-0.0757742	0.0909712	-0.101082	-0.209886	-0.162485	-0.268262	-0.0162932	-0.215555
208125	-0.0280513	-0.0783335	-0.120638	-0.0541016	-0.0523408	-0.0234897	-0.0881404	0.0299282	0.0604893	-0.0215696	-0.0892408	0.0188488	-0.0385801	-0.0331345	-0.206607	-0.0454937	-0.125036	-0.0100377	-0.0462536	-0.0324263	0.0221917	-0.0491034	-0.0790383	-0.0583464	-0.0232515	-9.03899e-05	-0.195849	-0.0390334	-0.183644	-0.136597	-0.0390226	-0.17987	-0.115906	-0.0262231	-0.11099	-0.0619304	-0.0830665	-0.187558	0.0391789	-0.0777902	-0.0542035	-0.0190728	-0.0283224	-0.206469	-0.12083	-0.181439	-0.0380376	-0.0809568	-0.0746693
208226	-0.0290322	0.043637	-0.025154	0.034789	-0.0355322	-0.0456519	0.065478	0.0575585	0.0843596	-0.121636	-0.11232	-0.297029	0.0464125	-0.0601374	-0.119655	0.00746977	0.00247437	0.0170545	0.0344817	-0.0727151	-0.106407	-0.116376	0.0402746	-0.110723	-0.15063	-0.143875	-0.192813	-0.321536	-0.0260812	0.0839093	0.0241395	-0.136569	0.0853745	0.0271623	-0.0908263	0.0718505	-0.110052	-0.237301	-0.0164994	0.0394424	-0.0669314	-0.0341333	-0.131505	-0.258645	-0.257117	-0.23714	-0.112446	0.00474182	-0.226954
208327	-0.0487416	0.0030574	-0.0455474	-0.0468526	-0.0825413	-0.149382	-0.116235	0.0529407	0.105567	-0.041753	-0.10513	-0.120135	-0.0436302	-0.00958298	-0.0250236	-0.0814821	-0.0617157	-0.0722964	-0.0675489	-0.0883752	-0.063323	-0.205573	0.0180182	-0.0347725	-0.272753	-0.00718994	-0.0640456	-0.147453	-0.143529	-0.0581764	0.052849	-0.37516	0.000656663	-0.168646	-0.156029	0.00338609	-0.0879585	-0.19722	-0.110097	-0.0687429	0.0673479	0.0070232	-0.0618255	-0.0604487	-0.0337773	-0.0352146	0.0111307	-0.0570049	-0.0406875
208630	-0.0201947	-0.0598925	-0.059365	-0.058927	-0.0284852	-0.0307668	-0.0495481	0.0114321	0.00669429	-0.0121451	0.000711474	-0.0368603	-0.0749504	-0.0131772	-0.0289893	-0.0689551	-0.0530159	-0.0929156	-0.0171549	-0.0443976	-0.0767485	-0.0350393	-0.0485858	0.00587758	0.00620715	-0.0160261	-0.07718	-0.0225558	-0.0427204	0.0397628	-0.00988377	0.0153762	0.0332115	0.0196171	-0.0173821	-0.0403975	-0.0700253	-0.0375724	-0.0354743	0.0236395	-0.0353443	-0.0120895	0.0160428	-0.0473837	-0.11376	-0.101781	-0.0604097	-0.0117618	-0.0547582
209127	-0.0512061	-0.048957	-0.13404	-0.174443	-0.192335	-0.109386	-0.150568	0.00686642	-0.0166606	-0.274681	-0.205238	-0.322232	-0.164622	0.044743	-0.103364	-0.158836	-0.136851	-0.0599087	-0.124225	-0.113675	-0.0984883	-0.0921842	-0.0668316	-0.0401573	-0.169321	0.0245962	-0.227872	-0.142115	-0.160071	0.0155753	0.0142124	-0.042384	0.0280456	0.112894	-0.00784524	-0.120201	-0.148749	-0.200252	-0.117493	-0.0093345	0.0317389	-0.23815	-0.036547	-0.148832	-0.152543	-0.172509	-0.10659	-0.235491	-0.193782
209228	0.0581908	0.0380662	-0.202068	0.0871916	0.0792454	0.117714	0.00212543	0.12086	0.198233	-0.23368	-0.405709	-0.421342	-0.0319671	-0.290413	-0.399424	-0.0766606	-0.204098	-0.0942566	-0.0400643	-0.0191459	0.00230657	-0.194539	0.0936673	-0.0337999	-0.250769	-0.133108	-0.35345	-0.348662	-0.241603	-0.158705	-0.167399	-0.309216	-0.170702	-0.216755	-0.201414	-0.155281	-0.171026	-0.39021	-0.0471725	0.0312473	0.0688609	0.0134658	-0.0165574	-0.214896	-0.315085	-0.475529	-0.0621946	-0.0812477	0.00573161
209329	-0.216688	-0.29008	-0.32776	-0.307572	-0.326898	-0.290995	-0.137242	0.0557882	0.144706	-0.253626	-0.359742	-0.381526	-0.294958	-0.124915	-0.245885	-0.309598	-0.231219	-0.274202	-0.237666	-0.277434	-0.285893	-0.277874	-0.176002	0.0377256	-0.534783	-0.258109	-0.307242	-0.31295	-0.0593148	0.0111258	0.121245	-0.349245	0.11132	0.116892	0.17214	-0.311494	-0.40074	-0.496678	-0.0612106	-0.194782	-0.159601	-0.234961	-0.2714	-0.233853	-0.371162	-0.220589	-0.177869	-0.315902	-0.267437
209834	-0.103539	0.0109022	-0.24235	-0.194318	-0.155861	-0.103812	-0.0124914	0.0447602	0.0416579	-0.054941	-0.0819291	-0.0240359	-0.135982	-0.135252	-0.463772	-0.307686	-0.308931	-0.126979	-0.251356	-0.0119182	-0.125393	-0.131545	-0.0278641	0.00991225	-0.0288727	-0.121708	-0.14442	-0.191693	-0.334652	0.132028	-0.0538434	-0.220378	0.00143519	0.00542408	0.0066659	-0.0189852	-0.00375835	-0.102944	-0.0546848	-0.020061	-0.00785211	-0.0119188	0.00616224	-0.132879	-0.13379	-0.24562	-0.293136	0.0203276	-0.0715184
209935	-0.0208481	0.0349138	0.0536023	0.115892	0.159981	0.139389	0.209078	0.094878	0.137308	-0.0659504	0.0311001	-0.335294	0.183386	-0.251331	-0.413146	0.165434	0.147073	0.13697	0.118819	0.0831832	0.0452667	0.0835134	0.0239833	0.258638	-0.474331	-0.400424	-0.162299	-0.415116	-0.382538	-0.495844	-0.163883	-0.1822	-0.318211	-0.456987	-0.387238	0.128794	0.131616	0.00170584	0.127994	0.0781476	0.0394772	0.241953	0.127633	0.0252459	-0.0838257	0.0913869	0.117914	0.105639	0.148165
210011	0.0200976	0.0725828	-0.0482182	0.0684385	-0.109936	-0.0866448	-0.0726206	0.176432	0.197852	-0.251798	-0.201191	-0.204711	-0.0743107	-0.0802066	-0.329029	-0.0237843	-0.188532	-0.142275	-0.0809424	-0.0449286	-0.0391761	-0.197599	0.174364	-0.0657469	-0.23116	-0.164148	-0.258909	-0.146968	-0.145079	0.0230121	-0.136224	-0.359541	-0.00266094	0.00651907	-0.115275	-0.228853	-0.132073	-0.403928	-0.0246798	-0.0763902	0.0325199	-0.215168	-0.0322657	-0.28435	-0.220505	-0.131523	-0.241859	-0.237767	-0.0531247
210112	-0.163769	0.034778	0.00143329	-0.145681	-0.154526	-0.104233	-0.0418253	0.034646	0.0587774	-0.0371096	-0.113554	-0.258785	-0.0775453	-0.0792428	-0.152462	-0.0584325	-0.0352223	-0.0383219	-0.00737197	-0.0272511	-0.017768	-0.113512	0.0609346	-0.0313157	-0.0985449	-0.115865	-0.142041	-0.108123	0.0651969	0.0233961	-0.040074	-0.125017	0.0584647	-0.0486822	-0.0427677	0.00180051	0.0315691	-0.000169525	0.0109231	0.0624802	0.0645796	0.0666466	0.0205302	-0.136086	-0.089278	-0.176216	0.00364901	-0.0322761	0.00798985
210415	-0.160731	-0.0719213	-0.208036	-0.176174	-0.179124	-0.114314	-0.171564	-0.0924864	-0.0428411	-0.240555	-0.157009	-0.149566	-0.166409	-0.0947311	-0.109096	-0.187415	-0.0871008	-0.141311	-0.123688	-0.114055	-0.15209	-0.179083	-0.127066	-0.0283922	-0.224201	-0.113862	-0.0372348	-0.225906	0.0555915	0.153801	-0.0672353	0.0170442	0.0988006	0.0646695	-0.000989693	-0.130757	-0.151274	-0.139497	-0.0127656	-0.0934761	-0.0181376	-0.116273	-0.122903	-0.252468	-0.0928314	-0.12221	-0.0584946	-0.0429973	-0.146157
210617	-0.0909542	-0.0747648	-0.0870969	0.00699115	0.00994183	0.0551049	-0.028193	-0.0199634	-0.0355059	-0.115944	-0.193161	-0.255804	-0.06869	0.0539008	0.0169044	-0.0806544	-0.117924	-0.0875513	-0.0747987	-0.010793	0.0105195	0.0760407	-0.0896135	-0.00368188	-0.0931782	-0.0403697	0.0431433	-0.105899	0.0291622	0.10806	-0.0819045	0.0983249	0.0400918	0.102582	0.101438	0.0442217	-0.0219524	-0.0061238	0.0168937	-0.0214907	-0.0232341	-0.115919	-0.0777662	-0.146433	-0.0675261	-0.0329643	-0.109148	-0.100389	-0.116741
211114	-0.0789421	-0.121253	-0.0949858	-0.0528814	-0.0343186	-0.0296778	-0.0479912	0.0536989	0.0172381	-0.226889	-0.19026	-0.32168	-0.0702899	-0.115162	-0.358141	-0.110468	-0.232705	-0.0423573	-0.11978	-0.00970381	0.00695735	0.0253322	-0.0633205	-0.133375	-0.170676	-0.216454	-0.214076	-0.120482	-0.438853	0.0257586	0.0150166	-0.0954886	-0.0401415	0.0573758	0.0837953	-0.134727	-0.336491	-0.381453	-0.312503	-0.156444	-0.0275584	-0.161164	-0.211009	-0.352964	-0.303069	-0.379852	-0.420374	-0.284484	-0.29829
211215	-0.0806789	-0.0328662	-0.0307228	-0.0822033	-0.0861486	-0.0635983	-0.082282	0.0363867	0.0162582	-0.082775	-0.0968268	-0.0628243	-0.0649037	-0.0232336	-0.0638551	-0.0439389	-0.0194083	-0.00341321	-0.0170218	-0.0739335	-0.0176171	-0.0338895	-0.0416105	-0.074152	-0.123958	-0.0502185	-0.128681	-0.105403	-0.0558251	0.0161271	0.0369278	-0.0224477	0.0240146	0.000943129	-0.0425757	-0.058633	-0.113101	-0.12063	0.0390015	-0.0348102	0.00702377	0.015587	-0.0469917	-0.141369	-0.0382475	-0.0636967	0.0337706	-0.0449633	-0.00441742
211316	-0.00146833	-0.00564581	-0.0657011	-0.0329735	0.00461347	0.0563745	-0.0228856	0.0608313	0.0363537	-0.130671	-0.077357	-0.280691	-0.00822123	-0.187253	-0.178184	-0.0298237	-0.0285032	-0.0514715	-0.0209987	0.00548814	0.005707	-0.00118449	-0.00787246	-0.0329092	-0.254685	7.23781e-06	-0.151004	-0.177704	-0.206566	-0.0196885	-0.0657404	-0.265813	-0.0675741	-0.0782207	-0.11142	-0.0981292	-0.0922557	-0.199104	-0.020899	-0.123791	-0.0347263	-0.0852566	-0.0943607	-0.208587	-0.132157	-0.0555335	-0.0927556	0.00614598	-0.0778441
211417	0.0229511	-0.0929641	-0.0955923	-0.0131936	-0.0911711	-0.0376658	-0.0484217	0.0107783	-0.0407005	-0.131954	-0.149318	-0.192233	-0.0682398	-0.0913058	-0.134915	-0.0936491	-0.0834631	-0.129668	-0.0804398	-0.0928421	-0.0526889	-0.0355072	-0.0766489	-0.00743136	-0.195262	-0.164757	-0.103491	-0.238496	-0.0970336	-0.0392032	-0.106857	-0.136333	-0.00896328	0.0313994	-0.0692649	-0.149976	-0.162342	-0.177684	-0.0285274	-0.114664	-0.086122	-0.130125	-0.115975	-0.0981182	-0.0727282	-0.0504645	-0.0709834	-0.0968901	-0.13752
211619	-0.166453	-0.116327	-0.263819	-0.174217	-0.218769	-0.115776	-0.191334	-0.028882	-0.0197008	-0.174116	-0.0555054	0.0157742	-0.216821	-0.10819	-0.172617	-0.15775	-0.020187	-0.131432	-0.0952452	-0.0667905	-0.0456879	-0.117905	-0.108977	0.0066499	-0.0997455	-0.0278839	-0.207298	-0.060018	-0.109473	-2.99211e-05	-0.149682	0.0271887	0.0154702	0.0285907	-0.00549591	-0.0974158	-0.153941	-0.144683	4.38504e-05	-0.149798	-0.0426753	-0.157706	-0.0499954	-0.132628	-0.200984	-0.12247	-0.116056	-0.0742616	-0.073812
211720	0.0423664	-0.0415918	-0.00037721	0.0699464	0.017332	-0.0308363	0.0259298	-0.0283083	-0.0541484	-0.0415229	-0.0378769	-0.0569049	-0.0261149	0.0603709	0.0371079	-0.0348998	-0.0227118	-0.0718092	-0.0264262	-0.0318666	-0.0491249	-0.0571375	-0.00492911	0.00907032	-0.0918971	-0.0400237	-0.0706306	-0.08689	-0.0441776	-0.0436397	-0.0240545	0.0350389	-0.0354126	0.0136898	-0.00317361	0.0424462	0.0189635	-0.0201083	0.0100048	-0.0206914	0.00353396	-0.035838	-0.0183957	-0.014467	-0.00954985	-0.0260099	-0.0314153	-0.0133174	-0.0314514
211821	-0.22365	0.079007	-0.202986	-0.22483	-0.213856	-0.19702	-0.180255	0.13097	0.0881548	-0.165521	-0.196722	-0.224179	-0.160034	-0.196908	-0.210931	-0.159195	-0.279313	-0.218369	-0.178193	-0.185035	0.0233045	-0.0679017	0.00694491	-0.109144	-0.28955	0.000979993	-0.0349114	-0.020532	0.0726724	0.0726025	-0.14932	-0.10213	0.0155365	-0.0116563	0.0477555	-0.0798534	-0.219263	-0.249556	-0.0651384	-0.0119436	0.0206653	-0.167126	-0.114469	-0.174053	-0.255288	-0.284037	-0.240372	-0.13852	-0.200903
211922	-0.0168815	-0.0435456	-0.112338	-0.0121934	-0.00708485	-0.0243573	-0.0191367	-0.00670791	0.0715865	-0.172256	-0.08267	-0.0570182	-0.0720181	-0.135102	-0.206186	-0.0824022	-0.0986084	0.00943708	-0.0572757	-0.0427533	-0.0183968	0.0191016	0.0447071	-0.000758165	-0.145603	0.0418093	-0.274215	-0.23988	-0.0349359	-0.085915	-0.102284	-0.129761	-0.011383	-0.115926	-0.16738	-0.0302899	-0.0772116	-0.155017	0.0396538	-0.0850513	0.010819	-0.0377174	-1.06086e-08	-0.0820783	-0.167342	-0.216656	0.0209325	0.0286912	-0.0903711
212015	-0.0439249	-0.0184123	-0.0669455	-0.0707471	-0.0378484	-0.0153611	0.0129913	0.11082	0.108527	-0.169362	-0.0091677	-0.106549	-0.0360651	-0.107577	-0.172911	0.0109694	-0.00932413	0.0298443	0.0173633	-0.0174659	0.0255738	-0.0410262	0.0153133	-0.0164903	-0.058422	-0.0755745	-0.141877	-0.0522625	-0.122709	-0.0254069	-0.0885709	-0.120554	-0.0390136	0.0102917	-0.0756327	-0.0295871	-0.102501	-0.167156	-0.0170188	-0.0506499	0.00355838	-0.0451413	0.0391355	-0.0753381	-0.149137	-0.153917	-0.0928315	-0.0209306	-0.0984535
212116	-0.218356	-0.0150516	-0.304156	-0.18801	-0.192087	-0.124115	-0.101118	-0.053127	-0.0456771	-0.302753	-0.150404	-0.242395	-0.239081	0.016064	-0.282366	-0.188785	-0.166723	-0.052527	-0.154423	-0.113162	-0.0644716	-0.0876038	-0.0486782	-0.1387	-0.342872	-0.0322527	-0.196617	-0.283946	-0.129713	0.0685534	0.0289749	-0.142873	0.118343	0.0362635	-0.0459878	-0.191977	-0.239988	-0.217823	-0.114562	-0.0942867	-0.104736	-0.203453	-0.111184	-0.322997	-0.407834	-0.266533	-0.219757	-0.163659	-0.315416
212217	-0.149151	-0.105459	-0.0725329	-0.161834	-0.179882	-0.176627	-0.075265	-0.0993467	-0.0906714	-0.00884999	0.0555328	-0.0354241	-0.0773013	-0.210372	-0.333843	-0.123784	-0.114263	-0.111351	-0.159154	-0.126349	-0.0884564	-0.156248	-0.107319	-0.158113	-0.169307	-0.196473	-0.278559	-0.129744	-0.260754	-0.194876	-0.190001	-0.224711	-0.304473	-0.191402	-0.225263	-0.349489	-0.0729736	-0.200125	-0.0359897	-0.156588	0.0303566	-0.0932328	0.0660258	-0.18741	-0.280379	-0.0721534	-0.227108	-0.0551844	-0.0570939
212318	-0.0277003	-0.0126631	-0.0876432	-0.116748	-0.08011	-0.00173832	-0.0237058	0.0389956	0.0767258	-0.0191217	-0.0286022	-0.024513	-0.106875	-0.11194	-0.325219	-0.078915	-0.100984	-0.0530831	-0.0549337	-0.0572332	-0.0383015	-0.0828614	-0.0467145	0.0108566	-0.0510788	-0.0368357	-0.268058	-0.0376586	-0.345042	0.0355264	-0.038907	-0.354376	0.0987382	-0.119552	-0.144658	-0.218495	-0.129453	-0.282109	-0.074681	-0.165864	-0.00495002	-0.0155879	0.045272	-0.373406	-0.117041	-0.302908	-0.00197227	-0.0763871	-0.0671638
212419	-0.118013	-0.122215	-0.0302062	-0.201968	-0.139226	-0.0723162	-0.1008	0.0285516	-0.002684	-0.218028	0.0120915	0.0309455	-0.120396	-0.121957	-0.187678	-0.142199	-0.0906663	-0.184991	-0.158298	-0.0632216	-0.0815483	-0.141263	-0.169185	-0.0266654	-0.261622	0.00664989	-0.262893	-0.121373	-0.200646	-0.0421038	0.0442809	-0.221788	-0.110546	0.000153212	-0.141051	-0.158216	-0.170569	-0.235147	-0.105837	-0.13154	0.127425	-0.163446	-0.0289395	-0.194047	-0.129345	-0.292586	-0.209356	-0.211324	-0.177219
212823	-0.0175205	-0.0184211	-0.240431	-0.0564461	-0.104823	-0.0738354	-0.0358023	0.0486731	0.018647	-0.195696	-0.291051	-0.185925	-0.0976812	-0.107529	-0.169356	-0.065345	0.0435989	-0.0246974	-0.0417787	0.0450772	0.0241959	-0.0102461	-0.0305394	-0.0794191	-0.297709	0.0506422	-0.115789	-0.302304	-0.09855	0.0244514	-0.0805913	-0.148523	0.0416187	-0.122741	-0.0699592	-0.0591282	-0.229614	-0.261916	-0.0459949	-0.046146	-0.0856357	0.0205775	-0.117104	-0.217217	-0.221149	-0.17112	-0.00560185	-0.0147697	-0.109743
213017	-0.129915	-0.0178059	-0.0681857	-0.0867067	-0.106122	-0.0915761	-0.0507453	0.0963083	0.0789664	-0.257271	-0.143052	-0.203241	-0.0801656	-0.00202012	-0.114224	-0.0548494	-0.0743854	-0.0705635	-0.045543	0.025727	0.0212061	-0.0196737	0.0289071	-0.0398852	-0.323672	-0.252418	-0.183387	-0.1707	-0.192215	0.0102258	0.0254756	-0.113348	0.120315	0.0312907	-0.02306	-0.0819872	-0.278403	-0.345767	0.0990048	-0.02881	0.0928522	-0.13251	-0.17722	-0.270867	-0.193067	-0.213194	-0.166128	-0.117891	-0.036731
213421	-0.0981689	-0.0430303	-0.0432795	-0.0650762	-0.122447	-0.0898706	0.0811516	0.0728084	0.0925878	0.00823451	-0.137696	-0.143126	-0.0853965	-0.197372	-0.218663	-0.0262536	-0.0822652	-0.0615631	0.00924445	-0.0317184	-0.0811419	-0.0735927	0.0105709	0.10808	-0.0522331	0.0146129	-0.116425	-0.0294257	-0.160007	-0.0737585	-0.0353689	-0.157831	-0.0361249	-0.0889923	-0.059892	-0.00993737	-0.21221	-0.209241	0.00127145	-0.0131338	0.00800083	0.035274	0.0205941	0.00207955	-0.176685	-0.0917845	0.0129961	-0.0528573	-0.15565
213522	0.0188819	0.00786362	-0.048908	-0.0327864	0.00844721	-0.0399385	0.0161932	0.0605308	0.0412181	-0.115337	-0.088199	-0.109744	0.0531379	-0.0871373	-0.22226	-0.030421	-0.227974	-0.00456588	-0.0319545	-0.0302906	0.00179277	-0.0401863	0.0255013	0.0148603	-0.147659	-0.146961	-0.0907385	-0.255043	-0.0872202	-0.0211253	-0.0491967	-0.148291	-0.0253375	-0.114042	-0.0407152	-0.119578	-0.119048	-0.153364	0.0701284	-0.081666	-0.00341139	0.0322573	-0.0266861	-0.192363	-0.280755	-0.179028	0.0475968	-0.0461262	-0.148958
214019	-0.17323	-0.017394	-0.226259	-0.086921	-0.0387789	-0.0205236	-0.0757746	0.193208	0.153754	-0.136607	-0.202676	-0.145929	-0.125753	-0.191415	-0.170234	-0.11913	-0.162617	-0.0017073	-0.185153	-0.0793155	-0.0936846	-0.0941308	0.00262832	-0.0237827	-0.103526	-0.0282694	-0.122878	-0.113279	-0.029484	0.00339462	-0.0474505	-0.191418	0.00298478	-0.0548621	-0.100621	0.00259354	-0.183893	-0.225557	0.0334652	0.083822	0.106912	-0.118002	-0.179713	-0.115945	-0.209474	-0.271536	-0.164657	-0.183259	-0.258101
214221	-0.12553	-0.0188079	-0.112211	-0.0949524	-0.0681156	-0.0439733	-0.0707495	-0.0624492	-0.0556087	-0.162304	-0.046832	-0.09562	-0.0772608	-0.11663	-0.134479	-0.0474185	-0.00103187	-0.00685495	-0.0136931	-0.0035709	-0.0542707	-0.0468458	-0.0400437	-0.00141534	-0.129623	-0.0454076	-0.069651	-0.151925	-0.0219415	-0.054828	-0.142519	0.018223	-0.0135879	-0.00514969	-0.0267353	-0.0247259	-0.0617493	-0.0647691	-0.145874	-0.0674653	-0.0392673	-0.049842	-0.0919956	-0.108787	-0.0964579	-0.0512022	-0.0289621	0.0295547	-0.0226535
214423	-0.0657417	0.0204129	-0.131639	-0.0676404	-0.0504342	-0.0383331	-0.0170773	0.0113512	-0.00111786	-0.0324835	-0.00592333	-0.0676379	-0.0544351	-0.0762378	-0.117394	-0.0369463	-0.0243937	-0.0405295	-0.0368103	-0.0292235	-0.0386242	-0.038105	-0.0167675	-0.00789843	0.0101928	0.0268044	-0.116105	-0.0375358	-0.053685	0.000760124	-0.0836736	-0.0149704	-0.00537738	-0.0354084	-0.0305347	-0.0418889	-0.0154196	-0.0332832	-0.0426909	0.00791904	0.0250633	-0.0136841	-0.0157624	-0.0519311	-0.125021	-0.0877892	-0.00673548	-0.0142103	-0.0315709
214524	-0.0949575	0.0515393	0.053044	-0.0660864	-0.0697156	-0.0223483	-0.00524862	-0.0934569	-0.107907	-0.097079	-0.25691	-0.294807	-0.0187585	-0.0356862	0.0615131	0.0270183	0.0830222	0.00162211	0.0407216	0.0500091	0.0742981	0.0391587	0.0577592	0.0626738	-0.0487995	-0.247251	-0.13451	-0.0990243	-0.159024	-0.0848322	-0.07478	0.0908311	-0.133416	0.00188015	-0.0816745	0.0911714	0.100379	0.0725021	-0.04097	-0.0165222	0.0021578	0.0408355	-0.210869	-0.182549	-0.0472201	0.0292296	0.00754057	0.00401467	0.018228
214625	0.0312614	-0.0439627	-0.13328	-0.097264	-0.0646509	-0.0881674	0.00674963	-0.027525	-0.0186191	-0.180416	-0.166162	-0.228567	-0.0129114	-0.08945	-0.19447	-0.110567	-0.0996288	-0.0460108	-0.0890563	-0.0663561	-0.0401816	-0.00684694	-0.105051	-0.051572	-0.253658	-0.141757	-0.185645	-0.278995	-0.129788	-0.163155	-0.0372629	-0.0693253	-0.119294	-0.106925	-0.0681046	-0.170356	-0.163323	-0.14886	-0.0570511	-0.122876	0.0169919	-0.00527993	-0.119516	-0.0668365	-0.166926	-0.0611557	-0.0762413	-0.102482	-0.00508767
214726	-0.155897	0.0449474	-0.0887597	-0.176096	-0.216119	-0.286247	-0.177268	0.0412838	-0.00725796	-0.275413	-0.176236	-0.298159	-0.248098	-0.133916	-0.149636	-0.26437	-0.187467	-0.102606	-0.260929	-0.242501	-0.182579	-0.134255	0.0791114	0.0214036	-0.289888	-0.00291719	-0.247068	-0.197804	-0.114123	-0.0653959	-0.0581712	-0.274079	0.0187334	-0.119925	-0.102837	-0.0643191	-0.0203329	-0.1342	0.043335	-0.146333	0.0643643	-0.0119213	-0.132879	-0.3232	-0.160905	-0.20622	-0.0166655	-0.077305	-0.0632395
217126	-0.0841407	-0.0102512	-0.126259	-0.119497	-0.122066	-0.147301	-0.157297	0.0573539	0.0137618	-0.206099	-0.0333828	-0.0192215	-0.0840008	-0.0295019	-0.11002	-0.150923	-0.180425	-0.110754	-0.154286	-0.137925	-0.127741	-0.128033	0.00531862	0.0477291	-0.109589	0.0592202	-0.177624	-0.134377	-0.0974483	0.00378453	-0.111059	0.0353461	0.0228261	0.0862215	-0.00883155	-0.0317414	-0.00776632	-0.0650101	0.0195897	-0.000482845	0.0523921	-0.100935	-0.0123471	-0.178996	-0.16732	-0.200018	-0.12031	-0.103682	-0.0997421
217429	-0.0432432	0.0764882	0.0353256	-0.0355252	0.0166354	-0.0214616	0.00547976	0.0908533	0.0641013	-0.0365669	-0.102716	-0.221653	0.0129958	-0.0135349	-0.177156	-0.0173775	0.0346561	0.00495469	-0.0309596	-0.0111226	0.0044269	-0.0569836	0.0382454	0.0602287	-0.197854	-0.0498235	-0.168354	-0.132096	-0.152077	-0.0313956	0.0277532	-0.13078	0.00681846	-0.0317296	-0.153415	0.0522104	-0.0487401	-0.107375	0.0654193	0.0192073	0.0224416	0.0482138	0.0228553	-0.129368	-0.169272	-0.201609	-0.165286	-0.00423859	0.0335264
219231	-0.0893308	-0.0399029	-0.225237	-0.0866119	-0.125299	-0.0273163	-0.0502911	0.14375	0.1416	-0.0670738	-0.272433	-0.298083	-0.0914618	-0.211286	-0.440469	-0.0864639	0.00705407	0.167643	-0.0524316	0.0119322	0.0426074	0.0676458	-0.00801732	-0.0964339	-0.311661	-0.110131	-0.312003	-0.183331	-0.280331	-0.228355	-0.257908	-0.307844	0.0211803	-0.249052	-0.375391	-0.0920809	-0.1363	-0.392488	-0.121054	-0.139982	-0.0494646	-0.102078	-0.166869	-0.364682	-0.0998368	-0.120653	-0.0113653	-0.17824	0.00578169
220721	-0.0270876	0.0185373	0.0108308	-0.0328979	-0.0512554	-0.0615399	-0.0521889	0.0320979	0.0320432	-0.0632147	-0.171099	-0.0719777	-0.0359596	-0.0148829	-0.110909	-0.098758	-0.0965427	0.0668469	-0.0640085	-0.0702958	-0.0976667	-0.0838184	-0.043892	-0.0476056	-0.142516	-0.113274	-0.231136	-0.0775317	-0.121604	-0.0704657	0.0253647	-0.0957515	-0.0150741	-0.0547468	-0.126483	-0.00232306	-0.0712362	-0.141829	0.0277912	-0.00298069	0.0391403	0.0228266	-0.0872357	-0.133105	-0.126104	-0.0532203	-0.0320191	-0.10938	-0.0631808
221319	0.0643797	-0.00552235	-0.106015	0.0643778	0.0314207	0.000616031	0.0381138	-0.0705218	-0.102146	-0.152012	-0.12214	-0.184609	-0.0617042	-0.108138	-0.0835681	-0.0684391	-0.0435657	-0.020199	-0.0455007	-0.0243238	-0.0583895	-0.0356147	-0.0235837	0.0155701	0.0154049	-0.100104	-0.0649051	-0.127346	-0.0229174	-0.00790795	-0.0435032	-0.147485	-0.00139632	-0.00764063	0.00980883	-0.148913	-0.165053	-0.185403	-0.0904391	-0.0962253	-0.077841	-0.0820335	-0.150981	-0.0599716	-0.130709	-0.070884	-0.0631547	-0.0788756	-0.0283
223929	0.0611266	-0.0407044	0.0569653	0.0117568	0.0124045	-0.00930188	0.0136413	0.0871471	0.0623647	-0.0688911	-0.101091	-0.214702	0.0023453	-0.0774766	-0.072397	-0.0438704	-0.043409	-0.0589644	-0.000868568	-0.0230191	-0.0166292	-0.0198704	-0.0278158	-0.0388842	-0.124605	-0.0333293	-0.071211	-0.130788	-0.0702258	-0.043222	-0.00246256	-0.122922	0.00657484	-0.0159074	-0.00252161	0.0448102	0.01807	-0.0717833	0.0451457	0.0328658	0.051866	-0.0153908	-0.0274658	-0.0760505	-0.0453314	-0.0687579	-0.178271	-0.0520018	-0.00108513
224022	-0.0712646	-0.0926301	-0.105059	-0.0783116	-0.0955515	-0.110802	-0.0647062	0.0314618	0.0610883	-0.148659	-0.155969	-0.0444824	-0.0940712	-0.0413755	-0.11375	-0.129907	-0.101335	-0.122802	-0.0750316	-0.0394728	-0.094987	-0.131289	-0.0831683	-0.0637351	-0.12236	0.058153	-0.194188	-0.206485	-0.0426737	-0.0323538	-0.0848942	-0.0208021	0.0364739	0.0177062	-0.017366	-0.0751721	-0.0642202	-0.0984691	-0.125603	-0.0333802	0.0130333	-0.101867	-0.129056	-0.113451	-0.121826	-0.101351	-0.195726	-0.18329	-0.0740913
227432	-0.0442445	-0.0431465	-0.117262	-0.0577669	-0.116354	-0.0532143	0.0644476	0.00495302	0.000580773	-0.152227	-0.0722908	-0.0634756	-0.042718	-0.141889	-0.139754	-0.0696493	-0.058715	0.0445238	0.00652233	-0.0669147	-0.0363262	-0.0507987	-0.00989547	-0.0987707	-0.114981	-0.0717051	-0.118287	-0.0234046	-0.180794	-0.0611584	-0.0633574	-0.129785	-0.00255885	0.00193666	-0.0433998	-0.0477318	-0.0964837	-0.135588	0.0211623	-0.110435	-0.0352838	-0.0392558	-0.0338977	-0.152148	-0.183734	-0.13596	-0.128256	-0.125198	-0.116622
227533	-0.149938	-0.0858815	-0.131801	-0.14609	-0.141917	-0.102508	-0.128746	0.0547182	-0.0436479	-0.311101	-0.189325	-0.0370649	-0.0965632	-0.0836028	-0.121444	-0.0918917	-0.0523131	-0.0527266	-0.0689227	-0.0769701	-0.0511478	-0.0851982	-0.0300303	-0.0853066	-0.109485	0.0491209	-0.265237	-0.146797	-0.211428	0.0499079	-0.0415525	-0.0414649	0.0411423	-0.0483854	-0.120049	-0.140689	-0.121119	-0.237356	-0.0404093	-0.113165	-0.00974677	-0.050851	-0.120073	-0.234326	-0.348603	-0.30287	-0.16578	-0.0313445	-0.223674
228434	-0.157982	-0.107725	-0.191479	-0.156669	-0.1737	-0.243681	-0.175159	0.000602582	-0.0228652	-0.359743	-0.23991	-0.278258	-0.122031	0.215521	-0.110851	-0.204504	-0.291134	-0.281094	-0.228845	-0.212717	-0.165349	-0.015289	-0.183398	0.00455398	-0.296374	-0.312604	-0.0833825	-0.158103	-0.137571	0.151959	0.156732	0.0285783	0.216997	0.197462	0.0724935	0.0149736	-0.122558	-0.157437	0.141356	-0.0753473	0.0211141	0.0233353	-0.152466	-0.303331	-0.114226	-0.22645	-0.127023	-0.177543	-0.195396
231928	0.109184	-0.0413985	-0.0234887	0.0456044	0.0331501	0.0330541	0.0323492	0.0794369	0.0395716	-0.094236	-0.107649	0.0310553	-0.0206422	-0.100746	-0.189965	0.000616392	-0.0402733	-0.0396026	0.00990156	0.00307722	-0.00351477	0.0217877	-0.0144249	-0.0753535	-0.190786	0.114275	-0.228383	-0.191145	-0.181237	-0.0558583	-0.0512215	-0.0898263	-0.0229807	-0.113441	-0.118032	-0.0532141	-0.0240163	-0.107268	0.0185436	-0.0424838	-0.057249	-0.0792449	-0.0824817	-0.0692562	-0.136341	-0.28539	-0.229757	-0.115303	-0.0213181
233326	-0.0941878	-0.0770788	-0.117605	-0.0891033	-0.0712451	-0.0790144	-0.0895797	0.0132499	0.0309491	-0.151172	-0.118788	-0.0973105	-0.12104	0.0345998	-0.074523	-0.134181	-0.0708215	-0.120732	-0.0532173	-0.045163	-0.0586015	-0.0633968	-0.0957742	0.0234882	-0.140705	-0.0294185	-0.026099	-0.0281356	0.00632794	0.043747	-0.0475919	0.0311031	0.0575004	0.0721823	0.0774143	-0.0551629	-0.11151	-0.136847	-0.000496449	-0.0389358	-0.0216251	-0.0910019	-0.049379	-0.157647	-0.131557	-0.114288	-0.0479065	-0.097759	-0.0365097
236130	-0.0377335	-0.13716	-0.388423	-0.119825	-0.185807	-0.150384	-0.0685172	-0.0121531	-0.0276059	-0.299754	-0.299497	-0.272545	-0.171318	0.0408716	-0.223107	-0.21553	-0.196863	-0.148588	-0.170927	-0.218788	-0.0929993	-0.146613	-0.143191	-0.0358018	-0.179867	-0.0928136	-0.242594	-0.155693	0.0330154	0.11328	0.00933206	-0.238497	0.177744	0.0724131	-0.0873884	-0.169363	-0.154728	-0.302877	-0.0837599	-0.130055	-0.038999	-0.111145	-0.148025	-0.246347	-0.123429	-0.174766	-0.0916042	-0.169074	-0.145961
237334	0.0214089	-0.131728	-0.125541	-0.0940143	-0.109662	-0.115801	-0.0653873	0.0288076	0.0468291	-0.11356	-0.0795976	-0.167945	-0.0980325	-0.216695	-0.22655	-0.135277	-0.107146	-0.129276	-0.12299	-0.0816477	-0.0939643	-0.149711	-0.130484	-0.0378682	-0.160454	-0.0082606	-0.253125	-0.261087	-0.180989	-0.0845641	-0.167496	-0.169011	-0.0780015	-0.0626051	-0.102993	-0.0541059	-0.142049	-0.19877	-0.017058	-0.0952744	0.0431423	-0.0437869	-0.0483129	-0.0790482	-0.136045	-0.0381063	-0.0946301	-0.0184867	-0.0669756
238033	-0.265294	-0.199409	-0.253143	-0.238316	-0.271364	-0.179842	-0.244895	-0.0924744	-0.0539617	-0.317965	-0.154306	-0.379474	-0.212824	-0.0166243	-0.17077	-0.213939	-0.267996	-0.222388	-0.147339	-0.133794	-0.126515	-0.0982574	-0.151496	-0.0416392	-0.3668	0.0946534	-0.0169456	-0.225054	-0.168168	0.234359	0.136511	-0.0023256	0.286799	0.0980221	-0.0650027	-0.302217	-0.279605	-0.34419	-0.417576	-0.0943286	-0.134847	-0.284291	-0.0938547	-0.34286	-0.464822	-0.455402	-0.486782	-0.0859349	-0.394408
239136	0.0282258	-0.0697356	-0.196667	0.0500881	0.0497856	0.0832238	-0.0430834	-0.0531611	-0.0792886	-0.23515	-0.341102	-0.382472	0.0629328	-0.0273097	-0.0935268	-0.100663	-0.256124	-0.0611162	-0.104353	-0.0225194	-0.0355307	-0.0593288	-0.150373	-0.0489063	-0.291452	-0.345489	-0.162304	-0.251502	-0.157919	0.165697	0.0519242	-0.114642	0.171535	0.167727	0.0605076	-0.186695	-0.307081	-0.366851	-0.00488942	-0.203101	-0.126174	-0.156893	-0.223837	-0.342299	-0.287992	-0.214652	-0.150765	-0.0656337	-0.219833
239944	0.0835676	0.183368	-0.0301244	0.0938234	0.0697838	0.0249573	-0.0236506	0.114442	0.132865	-0.347002	-0.117407	-0.14472	0.0228766	-0.176963	-0.226301	-0.111389	-0.0926361	0.0279733	-0.0775259	-0.0677021	0.0780304	0.0354074	0.357519	-0.0485178	-0.107825	-0.389768	-0.307329	-0.00948105	-0.302062	-0.140669	-0.0955973	-0.22093	-0.16712	-0.163997	-0.22662	-0.236647	-0.194308	-0.318943	-0.0614218	-0.0782833	0.0609734	-0.0655975	0.0363575	-0.152182	-0.358279	-0.326979	-0.203324	-0.145773	-0.253523
245333	-0.0369864	0.0064475	-0.161553	-0.0577624	-0.0569027	-0.0450139	-0.0568295	0.0251381	0.00410763	-0.138417	-0.173049	-0.0247087	-0.0183794	-0.0663138	-0.13461	-0.099828	-0.173428	-0.170427	-0.15056	-0.0897164	-0.0616884	-0.0603543	-0.0570433	-0.0222928	-0.170575	-0.00253066	-0.124872	-0.0591673	-0.130871	0.00964533	-0.0505115	-0.0731092	-0.0617346	-0.0411585	-0.0470184	-0.183086	-0.0753669	-0.0927889	-0.115673	0.00434735	0.0551549	-0.205705	0.0557091	-0.0980552	-0.172089	-0.252308	-0.158557	-0.221184	-0.187032
246133	-0.0406898	0.0107086	-0.125288	-0.0590722	9.19877e-05	0.0166886	-0.0933711	0.192987	0.189407	-0.278767	-0.404952	-0.325393	-0.133628	-0.0649897	-0.2786	-0.232303	-0.226875	-0.139606	-0.204638	-0.0411601	-0.104998	-0.163541	0.0801113	0.0414713	-0.357627	-0.288911	-0.280284	-0.565672	-0.150659	-0.094753	0.147262	-0.237087	0.0467445	0.00051599	-0.0968793	-0.304686	-0.257074	-0.220697	-0.0880576	-0.0932864	-0.0383108	-0.203131	-0.205997	-0.350245	-0.261652	-0.329164	-0.14844	-0.131427	-0.19933
248339	-0.215819	-0.0268901	-0.203018	-0.153888	-0.162301	-0.0967778	-0.112141	0.0388882	0.0561921	-0.228419	-0.0971386	-0.193711	-0.10263	-0.154102	-0.131767	-0.119674	-0.117577	0.0368633	-0.0699122	-0.0812389	-0.0707907	-0.145445	-0.076696	-0.01028	-0.258725	-0.0429261	-0.115184	0.0381954	0.0238259	0.102454	-0.0153202	-0.0140497	0.0466611	-0.0385426	-0.0564028	-0.0874007	-0.165063	-0.206184	-0.0858491	-0.0590575	-0.0384748	-0.0986899	-0.092092	-0.195511	-0.15826	-0.232461	-0.291101	-0.0689431	-0.124403
249947	0.100162	0.0939249	0.0854776	0.10184	0.119155	0.169475	0.192763	-0.0261572	-0.0156293	-0.0669802	-0.390329	-0.591638	0.115555	-0.231313	-0.196622	0.157949	-0.202018	-0.209678	0.213873	0.167536	0.106974	0.0566027	0.0621969	0.0179448	0.250524	-0.201604	-0.371261	-0.21314	-0.31007	-0.328988	-0.198679	-0.00822253	-0.245098	-0.314475	-0.242828	0.127626	0.185733	-0.103639	0.0588995	0.0251928	0.0560035	0.0516659	-0.140028	-0.173303	-0.193165	-0.110831	-0.303423	-0.23319	-0.169867
250427	-0.0813909	-0.0931711	-0.105663	-0.146846	-0.0865687	-0.0189661	-0.0471464	0.06399	0.0815138	-0.243548	-0.0872586	-0.19587	-0.0767412	-0.104567	-0.232134	-0.123482	-0.0606765	-0.0820474	-0.0121503	-0.0673572	-0.00876812	-0.0588094	-0.0545713	0.00721364	-0.0648747	-0.190707	-0.155694	-0.101951	-0.208442	-0.0225115	-0.0635773	-0.0978438	-0.0209529	-0.0818792	-0.0414446	-0.0193583	-0.05001	-0.114666	0.0260492	0.00390204	0.0415717	-0.125476	0.0160715	-0.0868578	-0.154093	-0.202591	-0.0997136	-0.240525	-0.169213
250932	0.0522293	-0.0929559	0.00143179	0.0026087	0.0363051	-0.0221841	0.00433443	-0.0495112	-0.0498129	-0.0598273	-0.094069	-0.085133	-0.0297024	-0.0450864	-0.0205413	-0.0369061	-0.0173939	0.0192412	-0.044706	-0.0888589	-0.0553597	-0.0431154	-0.0797731	0.0744622	-0.177734	-0.152182	-0.159287	-0.173207	0.00138596	-0.10295	-0.0446062	0.0325251	-0.136995	-0.0293406	-0.0858325	-0.00891241	0.0435445	-0.000466676	0.0319111	0.026202	0.0651093	-0.0516832	-0.0365866	-0.0755556	-0.0797108	0.0507413	-0.0417061	-0.000523866	0.0135446
251833	-0.0883475	-0.101828	-0.16529	-0.092912	-0.0709268	-0.0119985	0.0223902	0.0216078	-0.00907328	-0.233305	-0.0676886	-0.209492	-0.0869424	-0.081631	-0.275472	-0.0571238	-0.145142	-0.0190694	-0.0266861	-0.039035	-0.085521	-0.0701817	-0.121296	-0.051804	-0.061375	0.055889	-0.215742	-0.192211	-0.062009	-0.0341081	-0.101656	-0.046375	-0.0178806	-0.152883	-0.171959	-0.0826077	-0.127601	-0.153887	-0.122892	-0.11288	-0.00926189	-0.0981971	-0.0615806	0.0113006	-0.209537	-0.177242	-0.0573438	-0.0307837	-0.103678
255639	0.023916	-0.0819076	-0.0607781	-0.00213837	-0.0293687	-0.0282701	-0.0731151	-0.191618	-0.134951	-0.384666	-0.116982	-0.259833	-0.0305241	-0.0476041	-0.0707097	-0.0925802	-0.0601497	-0.161406	-0.0950584	-0.0945246	-0.0924237	-0.119622	-0.105602	-0.0934748	-0.0441888	0.132979	-0.103234	-0.18833	-0.142231	-0.0268245	-0.0345436	0.0317328	0.0296404	0.0212331	-0.00980153	-0.166953	-0.0948217	-0.0536626	-0.127937	-0.0805285	-0.0121088	-0.151487	-0.0447355	-0.0775703	-0.224079	-0.196677	-0.224401	-0.112626	-0.06107
255740	0.0319428	0.066949	-0.0794224	-0.0399344	-0.0621953	-0.0542191	-0.0180729	0.298437	0.301163	-0.216397	-0.305375	-0.391988	-0.142839	-0.0828972	-0.209274	-0.0640231	-0.387852	-0.0682005	-0.0767419	0.0223741	0.00624515	-0.167659	-0.0218676	-0.014311	-0.179138	-0.376393	-0.362052	-0.0609364	0.110046	0.230334	0.0698613	-0.216237	0.270216	0.123398	0.0107633	-0.0207982	-0.2641	-0.396831	0.124199	-0.112325	0.016401	0.0742099	-0.301209	-0.514274	-0.210017	-0.297373	0.0376215	-0.176153	-0.0332239
256540	-0.00371038	-0.120503	-0.098533	-0.116659	-0.103439	-0.0755951	-0.110195	-0.0709963	-0.0776351	-0.00972862	-0.0323628	-0.0661988	-0.142556	-0.0236113	-0.080825	-0.109276	0.00369017	-0.113189	-0.0736436	-0.108393	-0.183616	-0.125088	-0.118209	0.0247049	-0.104437	-0.0894362	-0.121841	-0.13585	-0.0845491	-0.0601744	-0.0603099	-0.0361151	-0.0291311	-0.0296305	-0.0490253	-0.00316606	0.00135136	-0.0439859	-0.0484612	-0.0711681	-0.0214196	-0.131691	-0.00442662	-0.00525813	-0.0782922	-0.04237	-0.109891	-0.140164	-0.0701628
257542	0.0980864	-0.0711999	-0.365537	0.0110953	-0.0650793	-0.0848399	-0.0804739	-0.0365276	0.00184508	-0.374108	-0.24735	-0.270099	-0.0910798	-0.144458	-0.250445	-0.220309	-0.353969	-0.196773	-0.12427	-0.144586	-0.0416178	-0.214696	-0.0799704	0.00360932	-0.30894	-0.0503716	-0.350382	-0.284057	-0.130028	0.0594547	-0.0825773	-0.158284	0.0158934	-0.0233359	-0.0726763	-0.201055	-0.121138	-0.195496	-0.06357	-0.00254456	-0.00274994	-0.0451821	-0.133232	-0.289448	-0.127801	-0.268949	-0.255467	-0.0942144	-0.0714528
257845	-0.234206	-0.163198	-0.194247	-0.20799	-0.226199	-0.286949	-0.217177	-0.0477545	-0.0763607	-0.397105	-0.278853	-0.30426	-0.176191	-0.315286	-0.461833	-0.197065	-0.273385	-0.139155	-0.20174	-0.2567	-0.218698	-0.225485	-0.225891	-0.218684	-0.418514	0.0701596	-0.291733	-0.398184	-0.097886	0.133442	-0.136535	-0.216194	0.0755763	-0.179322	-0.2022	-0.283328	-0.384713	-0.519014	-0.0696499	-0.0965242	0.00716426	-0.236067	-0.171709	-0.155712	-0.495866	-0.2706	-0.315567	-0.271898	-0.324967
257946	0.0337332	0.0561558	0.0147088	0.0627936	0.086068	0.0399977	0.0399338	0.0557337	0.0536567	-0.194862	-0.0743778	-0.0394162	0.0380847	0.0127587	-0.129095	0.0227441	0.0181024	-0.0213563	-0.012151	0.0182533	-0.0108635	-0.0140653	0.0849355	0.0342315	-0.064969	-0.0879484	-0.071185	-0.086215	0.0359747	0.0875986	0.0806926	-0.129218	0.036497	0.00672504	0.0610487	0.0145764	-0.132812	-0.152628	0.0231099	-0.0560005	-0.0274991	0.00218132	-0.072783	-0.214236	-0.0577252	-0.0612288	-0.241582	-0.104565	-0.0219036
263436	0.101245	0.032952	0.0734828	0.0615172	0.039115	0.0200113	-0.0225293	0.100335	0.125593	-0.117068	-0.137278	-0.148511	0.0562913	0.0594735	0.030862	0.0174725	-0.0323986	-0.151012	0.000754797	0.0381517	0.0375507	-0.016542	0.00638333	0.0551685	-0.0985659	-0.10876	-0.0850093	-0.189029	-0.0358917	-0.00666483	0.128242	-0.0169118	-0.00208068	-0.0181835	-0.00304679	0.116021	0.0795996	0.00288002	0.143056	0.0907961	0.0265082	-0.0714489	-0.0604299	-0.167512	-0.122963	-0.1024	-0.0814659	-0.0525303	-0.149728
268749	-0.19433	-0.077583	-0.201637	-0.219385	-0.154074	-0.0180486	-0.0904835	-0.0461738	-0.0610986	-0.315512	-0.136025	-0.17982	-0.155395	-0.0766798	-0.245081	-0.120273	-0.0920581	-0.0299665	-0.103412	-0.024709	-0.0848571	-0.0615669	-0.0235956	-0.147187	-0.112408	-0.043153	-0.108748	-0.245601	-0.177157	0.0221718	-0.085817	-0.173491	-0.0535137	0.0358214	-0.0511718	-0.092289	-0.21673	-0.299599	-0.104931	-0.0393517	-0.0215755	-0.125883	-0.0765587	-0.160099	-0.0848404	-0.0348473	-0.091755	-0.187775	-0.0857631
268850	-0.0827381	-0.0153449	-0.116918	-0.12499	-0.127122	-0.0916496	-0.0233464	0.0381176	0.0249484	-0.0829397	-0.0795878	0.00565011	-0.0937293	-0.0742643	-0.0722337	-0.0771343	-0.0897561	-0.129955	-0.0494455	-0.103146	-0.0555276	-0.0795592	-0.107511	0.0577452	-0.0216734	-0.0655084	-0.0967356	-0.0076556	-0.0364629	-0.0324276	-0.0917115	-0.0332917	0.0078293	0.015538	-0.0157845	-0.0322692	-0.108581	-0.0798191	0.00910081	0.0466732	0.00397028	-0.0561644	0.010363	-0.119811	-0.119417	-0.0645948	-0.0359025	-0.0626855	-0.045716
270332	-0.12243	-0.0578047	-0.15166	-0.0849724	-0.0870781	0.0309589	0.0236766	0.0259096	0.00300555	-0.058649	-0.0114824	-0.0758371	-0.0693865	-0.285816	-0.247634	-0.0432847	0.0549977	0.0619292	-0.0111329	0.0394837	0.0155914	0.0595507	-0.0272557	-0.0426836	-0.0571275	-0.0305822	-0.179135	-0.0378066	-0.15985	-0.0776024	-0.153891	-0.139259	-0.133086	-0.116323	-0.0695985	-0.1462	-0.0662231	-0.153156	0.00648765	-0.0388482	0.0244745	-0.0138847	-0.0261984	-0.0562012	-0.166719	-0.143756	-0.0755995	-0.0254525	-0.0220364
274542	-0.021818	-0.0791705	-0.167592	-0.0719746	-0.0542868	0.0331655	0.177434	-0.0449107	-0.0306748	-0.10202	-0.0419117	-0.049341	-0.00882246	-0.0443335	-0.163039	0.0154761	-0.00843563	0.0365462	-0.0122713	0.0274064	0.0741914	0.0803341	-0.043963	-0.0676222	-0.132232	0.00918714	-0.174812	-0.17342	-0.148896	-0.0818267	-0.124218	-0.0938472	-0.0651985	-0.0113452	-0.117382	-0.0348594	-0.0714546	-0.173709	0.0140352	-0.0706537	-0.0137779	0.0070536	0.0191628	-0.139918	-0.119006	-0.104822	0.00495519	-0.0348513	0.0225813
275645	-0.237326	-0.0462365	-0.250412	-0.256443	-0.239993	-0.116545	-0.162907	0.0838049	0.100072	-0.277255	-0.182683	-0.270732	-0.135924	-0.0657135	-0.344671	-0.119269	-0.208698	-0.0879382	-0.0107231	-0.104401	-0.0492391	-0.136693	-0.0307021	-0.126437	-0.255656	0.0078853	-0.134707	-0.133653	-0.141088	-0.0215418	-0.126233	-0.203964	0.108929	0.103154	-0.0183969	-0.210432	-0.296508	-0.34139	-0.0382796	0.0400331	0.0043478	-0.0128791	-0.256606	-0.28507	-0.225497	-0.211385	-0.0406018	-0.0555861	-0.126024
280739	-0.0952283	-0.0332978	-0.145505	-0.0855986	-0.065886	-0.0609263	-0.0724916	-0.0303042	-0.0459455	-0.114255	-0.0403538	-0.182323	-0.112815	-0.106686	-0.134962	-0.145111	-0.0931079	-0.0694228	-0.0845699	-0.120832	-0.0979321	-0.0669743	-0.0357366	-0.0967679	-0.189363	-0.168601	-0.0768163	-0.14942	-0.0408616	0.00104374	0.0135195	-0.159261	0.0684928	0.0581892	-0.0729699	-0.0563951	-0.208616	-0.16717	-0.0947984	-0.0884001	-0.0488223	-0.101007	-0.189832	-0.0970032	-0.0282755	-0.0907764	-0.0873119	-0.103932	-0.0781768
280941	-0.0814797	-0.111795	-0.170823	-0.12239	-0.0836699	-0.0939451	-0.120952	0.071478	0.0415514	-0.177402	-0.33312	-0.365053	-0.0761994	-0.17067	-0.149452	-0.0994206	-0.151262	-0.231557	-0.0465799	-0.0650608	-0.0378934	-0.135261	-0.118008	-0.0492609	-0.215758	0.0725883	-0.27758	-0.321747	-0.0620004	0.0209087	-0.0773931	-0.298856	-0.0449484	-0.00552935	-0.213992	-0.113405	-0.142031	-0.258618	0.0190944	-0.0922304	-0.000232575	-0.0730592	0.111003	-0.351728	-0.258507	-0.466919	-0.164109	-0.100057	-0.268557
281135	-0.00969874	-0.0611741	-0.0573023	-0.0468543	-0.09198	-0.102406	0.0294653	0.0452638	0.0657914	-0.181276	-0.0752927	-0.0897336	-0.0157836	-0.109724	-0.237779	-0.0352893	-0.0706096	0.0595403	0.0178722	-0.0670078	-0.0435558	-0.0893777	-0.0452125	0.00396993	-0.148113	-0.0517102	0.0053413	-0.0882904	-0.0127901	0.133809	0.109476	-0.0844679	0.106005	0.037294	-0.0141587	-0.13179	-0.164958	-0.263819	-0.0511636	-0.145514	-0.00714488	-0.0807785	-0.0642623	-0.164326	-0.266132	-0.224201	-0.0964111	-0.105711	-0.0691653
283543	-0.182395	0.0361804	-0.168303	-0.178096	-0.180286	-0.12869	-0.0923447	0.0729872	0.0437188	-0.1173	-0.150577	-0.139621	-0.127771	-0.107318	-0.183709	0.00970913	-0.0142416	-0.000641918	-0.0836935	-0.164793	-0.0999869	0.0485264	0.144998	-0.0520324	-0.258174	-0.150736	-0.239086	-0.200447	-0.0335491	-0.0332287	-0.0859817	-0.121679	0.0117795	-0.0643212	-0.0864724	-0.238137	-0.157868	-0.289785	0.0253731	-0.128963	-0.0229316	-0.16443	-0.00692902	-0.0641138	-0.2059	-0.0740711	-0.0799333	-0.168535	-0.0856718
285345	-0.0523874	0.086518	-0.202021	-0.0292451	-0.0458458	-0.0483365	0.0473918	0.0861597	0.124847	-0.196748	-0.278803	-0.28515	-0.0603331	-0.100361	-0.179876	-0.0556637	-0.215889	-0.0667142	-0.041099	-0.0239446	-0.053741	-0.0893545	0.0497837	-0.0515396	-0.00688936	0.0127243	-0.211007	-0.252039	-0.0991904	-0.00257306	-0.0413282	-0.123441	-0.0463566	-0.109083	-0.163426	-0.00214041	-0.0966953	-0.234355	0.00768546	0.0187634	0.153034	0.0122973	-0.0348664	-0.208662	-0.314021	-0.381003	-0.222945	-0.0809859	-0.160849
285446	-0.0894692	0.048814	0.0841324	0.0963378	0.046773	-0.0251467	-0.0814049	0.240364	0.249067	-0.0560383	-0.212902	-0.109811	0.127761	-0.00393967	-0.209486	0.0636165	-0.0799417	0.05868	0.0677879	0.0175031	0.0342469	0.0145534	0.121379	-0.147396	-0.0959129	-0.220536	-0.218143	-0.0478356	-0.216101	-0.0348702	0.161263	-0.205669	0.0640524	-0.0293971	-0.114266	0.103892	-0.196014	-0.201585	0.120214	0.0826393	0.0916	0.0437976	-0.145015	-0.253264	-0.263621	-0.137527	0.0902268	-0.121373	-0.0398637
286347	-0.125959	-0.065727	-0.116023	-0.121703	-0.163102	-0.163107	-0.16612	-0.0521677	-0.0324698	-0.123574	-0.124216	-0.0797092	-0.0938704	-0.107729	-0.0726608	-0.0621971	-0.0747958	-0.0848089	-0.0745592	-0.100511	-0.129959	-0.137183	-0.0274907	-0.0790079	-0.22303	-0.00285491	-0.149036	-0.171824	-0.0484624	0.014229	-0.0719261	-0.181733	-0.0297895	0.0244497	0.0335307	-0.147951	-0.196724	-0.186416	-0.102089	-0.104539	-0.0956595	-0.042139	-0.116106	-0.144189	-0.0928211	-0.016187	-0.133431	-0.0229008	-0.0046326
286650	-0.123535	-0.0834202	-0.120552	-0.162414	-0.139814	-0.0582998	-0.101675	0.0888194	0.0370142	-0.284048	-0.111745	-0.37934	-0.17033	-0.172708	-0.422783	-0.0959135	-0.0158654	-0.0349868	-0.0204195	0.0242743	0.0294331	0.0619069	-0.0556104	-0.0788306	-0.339559	-0.0893521	-0.272181	-0.180732	-0.330443	-0.0922283	-0.164405	-0.177742	-0.0563253	-0.0397623	-0.0965144	-0.10157	-0.17454	-0.283953	-0.021493	-0.168815	-0.0793237	-0.133705	-0.191946	-0.358376	-0.334681	-0.369287	-0.359503	-0.0632685	-0.1179
287248	-0.164946	-0.0389098	0.00814386	-0.163284	-0.187329	-0.139053	-0.106406	0.0642128	0.0625762	-0.105631	-0.0181678	-0.126091	-0.162517	-0.0888498	-0.176758	-0.134326	-0.0823591	-0.0405754	-0.116368	-0.0991394	-0.0669108	-0.091775	-0.0263366	0.0378804	-0.00324569	-0.142472	-0.110764	0.00401931	-0.150152	-0.0357636	0.0833895	-0.0615652	-0.0161475	0.0142619	-0.0214192	0.00976573	-0.110092	-0.174878	-0.0425888	0.0458668	0.0520771	-0.077333	-0.0312821	-0.225947	-0.223912	-0.255015	-0.190494	-0.0779475	-0.0739464
289555	-0.137573	0.0204649	-0.185116	-0.186826	-0.142851	-0.0945789	-0.0711914	0.0361906	0.0372274	-0.112333	-0.0420601	-0.0877118	-0.139802	-0.0981004	-0.174822	-0.0828191	-0.0876965	-0.156238	0.0392713	-0.0516897	0.00554455	-0.093009	-0.0103199	0.0766866	-0.0992235	-0.0701277	-0.181571	-0.146733	-0.123827	-0.0624232	-0.15768	-0.0804873	-0.0716952	-0.0574721	-0.0977956	-0.0622604	-0.122598	-0.168832	0.0117799	-0.00158655	0.000181523	0.0132117	-0.104464	-0.161043	-0.198657	-0.240097	-0.0815948	-0.00328195	-0.0186469
290136	-0.137068	-0.084061	-0.227078	-0.114625	-0.112918	-0.0981743	-0.0534702	0.0278478	-0.000578164	-0.210459	-0.245537	-0.202711	-0.116943	-0.19807	-0.310198	-0.182557	-0.245672	-0.0436914	-0.115756	-0.0912904	-0.0685459	-0.0415479	-0.203432	-0.150563	-0.236881	-0.168635	-0.370204	-0.228432	-0.199342	-0.0970958	-0.0863926	-0.214843	-0.0551727	-0.0634678	0.0079688	0.0180708	-0.285068	-0.321324	-0.00471847	-0.0641948	-0.0463903	-0.0437654	-0.025224	-0.274591	-0.225871	-0.211596	-0.122568	-0.162972	-0.089559
293748	-0.0768886	-0.0724274	-0.197846	-0.188137	-0.152282	-0.139903	-0.101305	-0.046631	-0.0163634	-0.141478	-0.063314	-0.213586	-0.119122	-0.0782412	-0.0686826	-0.130728	-0.0981905	-0.0625767	-0.0217282	-0.0526614	-0.0527081	-0.0752221	-0.0872099	-0.0697145	-0.125475	-0.0112575	-0.0708759	-0.10373	-0.0456796	0.0397725	-0.00941345	-0.0798973	0.030753	-0.0789392	-0.0446525	-0.128821	-0.159964	-0.134224	-0.0790695	-0.0861041	-0.00811674	-0.0424545	-0.0667755	-0.129828	-0.134106	-0.204802	-0.134915	-0.108351	-0.0507557
295146	-0.0695215	-0.0448607	0.0133101	-0.0357269	-0.00305008	-0.012472	0.0342583	-0.0165212	0.0449877	-0.246328	-0.270729	-0.210494	-0.0416046	0.055179	-0.140987	-0.106222	-0.262184	0.0208747	-0.0308672	-0.0243255	0.0213232	0.00123941	0.0385605	-0.00286367	-0.0901211	-0.1028	-0.00119422	-0.00219257	-0.115644	0.0526872	-0.0168699	0.0954843	0.065328	-0.0830996	-0.0664325	0.118888	0.195261	0.0526035	-0.0166922	0.143612	-0.0492642	-0.126177	-0.0890347	-0.129492	0.0589012	-0.167517	-0.136216	-0.0273651	-0.0986616
297655	0.0721271	-0.0234185	0.0676947	0.0432761	0.013197	-0.0153987	-0.0449758	-0.0334168	-0.0112015	-0.0619941	-0.0358069	-0.0328931	0.0440991	0.0585959	-0.0235992	0.00680673	0.00538278	-0.124057	-0.0282038	0.00542089	-0.042188	-0.0468922	-0.0341307	-0.0187078	-0.069427	-0.064754	-0.0757159	-0.128457	-0.0682858	-0.00490211	0.0727613	-0.0436244	0.0329975	-0.0233389	-0.0631126	-0.015324	-0.0327695	-0.106071	0.0104805	-0.0912428	-0.0478055	0.0040122	-0.0450948	-0.126913	-0.0459814	-0.0860903	-0.0805211	-0.043659	-0.00750617
298051	-0.042296	0.07486	0.0472924	-0.0484095	0.0480491	0.102521	0.054039	0.028055	0.0474636	0.0354599	-0.0637178	-0.0344985	0.0636624	-0.094071	-0.10367	0.0300665	0.0211245	-0.0208717	-0.00457508	0.0612479	0.0379345	0.0907371	-0.0352374	-0.0125687	-0.0260145	-0.0419042	-0.195831	-0.000610101	-0.115805	-0.163576	-0.142208	-0.103457	-0.152944	-0.142147	-0.182921	0.0605489	0.0516418	-0.03217	0.00537369	0.0114785	-0.0357827	-0.102269	-0.0630218	-0.0812427	-0.0541986	-0.057972	-0.188664	-0.112776	-0.102319
298455	0.0134124	-0.0907733	-0.0381253	-0.0319041	-0.0118503	-0.00973644	-0.0417503	-0.104221	-0.145706	-0.125967	-0.0819241	-0.144793	-0.0546088	-0.0054407	-0.0096868	-0.0328968	-0.0274754	-0.0269512	0.00281558	-0.0307993	-0.0101041	0.05881	-0.119428	-0.0369702	-0.0873067	-0.1492	-0.08601	-0.076788	-0.122012	-0.0863287	0.000978711	0.0446646	-0.064209	-0.0250448	-0.0436126	6.43653e-05	0.0648049	0.109562	-0.0286414	-0.0434811	0.00872428	-0.0291822	-0.144551	0.0401521	-0.0573369	0.0960976	-0.0496992	-0.019138	-0.0432883
299154	-0.101238	-0.0704578	-0.239224	-0.151349	-0.174088	-0.190003	-0.125053	0.119495	0.136873	-0.103324	-0.204723	-0.158601	-0.185306	-0.208699	-0.278626	-0.151821	0.0187709	-0.168522	-0.117352	-0.141743	-0.125005	-0.150134	-0.0427806	-0.0383094	-0.229919	-0.0912683	-0.314074	-0.115984	-0.00618423	-0.0625362	-0.054912	-0.227594	-0.111369	-0.210221	-0.292068	0.104078	0.109557	-0.0796417	0.06951	0.0223318	0.0516136	0.178219	-0.160521	-0.0985491	-0.00489272	-0.0962543	-0.00841795	0.0537798	0.0908467
299760	0.066323	-0.0320261	-0.0339334	0.0204906	-0.00163343	-0.0196284	-0.00160651	-0.0264645	-0.020039	-0.043181	-0.0271951	-0.0293163	0.000481327	-0.00982616	-0.0556146	-0.0562723	-0.083444	-0.00328673	-0.0223666	-0.035014	-0.0310415	-0.0372304	0.0231601	-0.00384287	-0.0278759	0.0234942	-0.136436	-0.0771277	-0.0722199	-0.00144544	0.0474755	-0.0931257	0.0370647	-0.0127308	-0.0823325	-0.0661607	0.0142551	-0.0101439	-0.0337756	0.0128831	0.0126502	-0.0170649	0.0292326	0.0265165	0.0226766	-0.00069894	-0.0526447	-0.0291697	0.00417469
300618	-0.0530892	-0.0357381	-0.0826288	-0.082958	-0.0980408	-0.0708547	-0.0589425	-0.0397868	-0.0226372	-0.0501281	-0.0541584	-0.0898219	-0.0278884	-0.170451	-0.19606	-0.0920438	-0.136178	-0.118024	-0.0770764	-0.0790654	-0.067908	-0.0492274	-0.0191404	0.0194041	-0.0727143	-0.0918407	-0.147708	-0.0658925	-0.166841	-0.036146	-0.104762	-0.126146	-0.0515515	-0.0194528	-0.072019	-0.107144	-0.0811587	-0.155346	-0.0287115	-0.0975215	0.0125887	-0.049499	-0.016663	-0.115191	-0.102933	-0.11042	-0.0768111	-0.0674015	-0.056225
300719	-0.144642	0.0225276	-0.0524779	-0.14316	-0.108924	-0.0861809	-0.126811	0.107301	0.117185	-0.182768	-0.155388	-0.165562	-0.0320362	0.00288979	-0.107856	-0.0507977	-0.0386277	-0.0902836	-0.023061	-0.00014125	-0.0528642	-0.00236863	0.0765064	-0.0304424	-0.205287	-0.0697502	-0.146405	-0.10738	-0.08657	0.162026	0.145816	-0.074281	0.108249	0.0906509	0.0395024	0.0341964	-0.123958	-0.151046	-0.00136191	-0.0125196	0.0101073	-0.0998369	-0.179928	-0.138531	-0.221593	-0.112587	-0.0274753	-0.0272852	-0.159667
303119	-0.115074	-0.160399	-0.205168	-0.203951	-0.219023	-0.187426	-0.0743124	-0.0194088	0.0414858	-0.132905	-0.00246387	-0.0372937	-0.174063	-0.0621004	-0.106517	-0.143616	-0.127141	-0.0575048	-0.120914	-0.160522	-0.157771	-0.123631	-0.0604504	0.0279675	-0.0665926	-0.164024	-0.0609199	-0.0740572	-0.0803909	-0.00857403	0.00415415	-0.0170025	0.0469255	0.0388333	0.00730564	-0.157933	-0.039321	-0.0342777	-0.22334	0.0158397	0.0159164	-0.181228	-0.0413648	-0.165439	-0.109311	-0.118488	-0.185724	-0.11233	-0.136341
303624	-0.0725651	-0.060013	-0.0917056	-0.118323	-0.0146094	-0.0282775	-0.111971	-0.141631	-0.16603	-0.145075	-0.162919	-0.282126	-0.000824252	0.0275104	-0.0121937	-0.0211226	-0.0203559	-0.0871653	-0.00306371	-0.102789	-0.0688861	-0.134634	-0.10824	-0.000171551	-0.192644	-0.17703	-0.13207	-0.210505	-0.0939781	-0.0301058	-0.154837	0.0656861	0.0373188	-0.0539807	-0.0278253	-0.0288756	0.0539387	0.00540763	0.00442776	-0.0647798	-0.0300317	-0.00575666	-0.10272	-0.00668282	0.000595079	-0.0207678	-0.100496	-0.0544348	0.0399342
304020	-0.0367838	-0.00814743	-0.0818789	-0.00346589	-0.0211114	0.0390086	-0.0881572	0.0209589	0.0359191	-0.14969	-0.0254669	-0.129279	-0.00263666	-0.0675192	-0.11076	-0.0533599	-0.0760704	-0.0362496	-0.0654699	0.00612336	0.0856944	0.0402801	0.0249442	-0.0273789	-0.0520771	-0.107527	-0.0863725	-0.00098821	-0.0652434	-0.00939321	-0.00529024	-0.0763542	0.0294516	0.00718654	-0.0263332	-0.0349892	-0.122623	-0.127074	0.0567601	-0.0490707	0.000331773	0.0304278	-0.104646	-0.134716	-0.0162981	-0.094436	0.0379365	0.0565885	0.0317786
304727	0.0132506	0.00533774	-0.0875308	0.0116395	0.00224258	0.0454108	0.0138381	0.0836762	0.0455554	-0.159479	0.0400519	-0.199606	0.0329129	-0.167556	-0.253716	0.0662855	-0.103615	-0.0119129	0.0393832	0.0106698	0.106194	0.102016	0.0170585	0.0610235	-0.130586	-0.0399257	-0.127507	-0.123345	-0.137938	-0.18711	-0.046989	-0.117307	-0.0900757	-0.11858	-0.132676	-0.0452651	-0.0261917	-0.102183	0.104666	0.0130733	-0.0188033	0.0746385	-0.0423197	-0.286925	-0.15629	-0.340683	0.0436572	-0.100301	0.0672733
305830	0.0440155	-0.00604416	-0.0592818	-0.0266622	-0.0538874	-0.0693402	-0.0352913	-0.0788815	-0.109765	-0.103962	-0.151877	-0.110222	-0.0397213	-0.067496	0.000230844	-0.0269168	-0.0708141	-0.0795371	-0.0279956	-0.0327643	-0.0565589	-0.0879497	-0.065746	-0.0576261	-0.14149	0.000182169	-0.092212	-0.0683484	-0.0520736	-0.0321704	-0.0763938	-0.0470677	-0.0320817	-0.0439514	-0.0574216	-0.0228744	-0.0244123	-0.0242689	-0.129546	-0.0651009	-0.0333435	-0.0261343	-0.00452562	-0.0654369	-0.0699893	-0.0319096	-0.0958552	-0.0227313	-0.144631
307127	-0.064476	-0.059191	-0.0470607	-0.0800948	-0.0887735	-0.0654733	0.0145114	-0.0152133	-0.00658277	-0.112454	-0.0869388	-0.0837776	-0.0509649	-0.0574487	-0.0771073	-0.0531453	-0.00211077	-0.108607	-0.0494321	-0.0223796	-0.0955098	-0.0656099	-0.0576544	-0.0330175	-0.0975522	-0.0246509	-0.0397814	-0.146912	-0.0256746	0.00885948	-0.0436919	-0.046323	0.00440491	0.00920747	-0.0199127	-0.0724046	-0.0483238	-0.0561593	-0.00587957	-0.0131352	-0.0221916	0.0123112	-0.0525844	-0.110142	-0.0757511	-0.00761666	-0.0524388	-0.0396706	0.00302993
308129	-0.222662	0.0792995	-0.187397	-0.224579	-0.248342	-0.188759	-0.189944	-0.176126	-0.127438	-0.292137	-0.212935	-0.300071	-0.2075	0.0877459	-0.151017	-0.222292	-0.262035	-0.140111	-0.149629	-0.0765581	-0.0231783	-0.0884349	0.0221192	-0.00921098	-0.352835	-0.273816	-0.221215	-0.276184	0.0433927	0.100466	0.00909512	-0.0612787	0.071114	0.120689	-0.00766933	-0.280433	-0.243616	-0.41213	-0.168096	-0.208419	-0.0960712	-0.105221	-0.336586	-0.318368	-0.391441	-0.239027	-0.024857	-0.0415753	-0.156154
308331	0.0150173	0.00828192	-0.0167547	-0.00991279	-0.0496551	-0.0405657	-0.0330382	0.0193131	0.0278819	-0.0491698	-0.051734	-0.0991334	-0.0865659	-0.045933	-0.0910486	-0.0536674	-0.0666388	-0.0307325	-0.0565509	-0.0381137	-0.0304294	-0.0702416	0.0068232	0.0121562	-0.0138578	-0.0526077	-0.0625482	-0.0200032	-0.087092	-0.120131	-0.0975687	-0.0593041	-0.0213851	-0.027828	-0.0735554	0.00984381	-0.01539	-0.0531421	-0.0554775	-0.0132518	-0.0137774	-0.0617125	-0.000139753	-0.128977	-0.0861636	-0.0722644	-0.101916	-0.0349385	-0.0486562
309636	-0.172697	-0.0624079	-0.232154	-0.169962	-0.168123	-0.148464	-0.118439	0.0292786	0.00695318	-0.210266	-0.13662	-0.123648	-0.134807	-0.00212349	-0.0223983	-0.11617	-0.0664776	-0.0147304	-0.106034	-0.0980126	-0.0640978	-0.0679043	-0.00321799	-0.0951918	-0.254523	-0.00726199	-0.0550464	-0.229093	0.0321448	0.130833	0.0484739	-0.104083	0.130777	-0.0247561	0.0407939	-0.15229	-0.15257	-0.108898	-0.0794196	-0.0579542	-0.00601721	-0.110483	-0.0824694	-0.210754	-0.149649	-0.0918814	-0.231153	-0.102401	-0.114788
310621	-0.176829	-0.112262	-0.149772	-0.190041	-0.21652	-0.129182	-0.114267	-0.0874293	-0.0461151	-0.264911	-0.15235	-0.25052	-0.166626	0.0549301	-0.104333	-0.127305	-0.134445	-0.185429	-0.0690645	-0.108437	-0.115137	-0.139394	-0.112616	-0.143134	-0.360581	-0.00590024	-0.19574	-0.40219	0.063964	0.112812	0.0441709	-0.098743	0.113161	0.200683	-0.0143356	-0.104234	-0.102784	-0.222834	0.0453473	-0.095994	0.0877486	-0.0443915	-0.119111	-0.32648	-0.235869	-0.264035	-0.0940334	-0.0852223	-0.122171
314225	0.0143785	-0.0570156	-0.0169699	-0.0185506	-0.0485469	-0.0425364	-0.045487	0.00732789	-0.0146654	-0.0495688	-0.1074	-0.0552377	-0.0689725	-0.113491	-0.0891839	-0.0701807	-0.0455298	-0.0463748	-0.0509545	-0.0627719	-0.080772	-0.0993935	-0.0716133	0.0238283	-0.0892386	0.00445164	-0.122812	-0.0611165	-0.122924	-0.103945	-0.0334403	-0.0478008	-0.0188978	-0.0772342	-0.0979913	0.0120535	-0.0260691	-0.0833395	-0.0189406	-0.0456187	0.041368	-0.0514278	-0.0193303	-0.0864168	-0.0586372	-0.103847	-0.0664937	-0.102814	-0.0389439
316633	-0.00452911	-0.0879091	-0.0570638	-0.0719929	-0.0747592	-0.0905542	0.00458672	-0.0103863	-0.030453	-0.102403	0.0872752	0.136511	-0.0375468	-0.176074	-0.146673	-0.092374	-0.0658127	-0.00682091	-0.0845261	-0.0539975	-0.0621453	-0.102586	0.0195872	-0.0300393	-0.0564994	0.0587537	-0.143762	-0.0958634	-0.0791896	-0.0976472	-0.0678935	-0.173855	-0.121855	-0.153084	-0.158693	-0.117588	-0.020531	-0.128754	0.011919	-0.0604185	-0.0120671	0.142045	0.0264906	0.0175897	0.00268108	-0.0229221	0.0322656	-0.0965218	0.0078422
316835	-0.176107	-0.0275202	-0.133981	-0.189022	-0.211334	-0.154583	-0.132098	0.119417	0.126331	-0.0776788	-0.10873	-0.209794	-0.10639	-0.00204057	-0.192229	-0.149819	-0.0554087	-0.0335407	-0.130088	-0.0549344	-0.0857367	-0.149586	0.00556387	0.0107366	-0.190833	-0.168738	-0.34041	-0.0911038	-0.191961	-0.0423882	0.0310663	-0.23054	0.0132654	-0.153282	-0.176556	0.0166009	-0.00782265	-0.0894938	0.0866828	0.0864628	0.163394	-0.0562496	-0.0158569	-0.280699	-0.150836	-0.201316	-0.0381747	-0.057481	-0.0170695
318637	-0.125256	-0.152795	-0.0802867	-0.179402	-0.18134	-0.132341	-0.122164	0.0223275	0.0233421	-0.341334	-0.319195	-0.24215	-0.163251	0.102645	-0.0524458	-0.205437	-0.212612	-0.146505	-0.167249	-0.206101	-0.0644917	-0.103115	-0.0472448	0.00452407	-0.198809	-0.11164	-0.126923	-0.32168	-0.131234	0.108616	0.0712063	-0.0145394	0.15085	0.138776	0.0539083	-0.088192	-0.175784	-0.232984	-0.00658501	0.0230557	0.0339419	-0.122795	-0.0421811	-0.176155	-0.169323	-0.183121	-0.191122	-0.282013	-0.100013
320826	-0.0167002	-0.0696341	-0.149355	-0.0280611	-0.0509326	-0.0782576	-0.0567735	0.0331887	0.0113245	-0.103249	-0.168822	-0.250968	-0.0584074	-0.0221112	-0.137032	-0.0631214	-0.0595651	-0.13573	-0.0285605	-0.058358	-0.0685748	-0.0635452	-0.0341647	-0.010959	-0.0256453	0.00498685	-0.105481	-0.114755	-0.114172	0.0292376	-0.0130588	-0.114519	0.00567195	0.00336288	-0.0173304	0.0267222	-0.0535277	-0.176723	0.0327206	0.00273209	0.0148041	0.00929917	-0.0414299	-0.19379	-0.252915	-0.249666	-0.00233441	-0.0340776	-0.205289
321323	-0.241796	-0.0679637	-0.0748662	-0.234024	-0.208172	-0.149712	-0.191711	0.0547151	0.03497	-0.167103	-0.0871617	-0.148365	-0.192247	-0.0940912	-0.149128	-0.184645	-0.115874	-0.193315	-0.13074	-0.146109	-0.112951	-0.132529	-0.138808	-0.027437	-0.164541	-0.0638888	-0.157046	-0.118815	0.00127739	0.0784903	-0.094426	-0.119485	0.0288199	0.0336224	-0.00296814	-0.0224818	0.0226842	-0.0890527	-0.0248382	0.0327614	0.0103196	-0.0711032	-0.172541	-0.105066	-0.0957885	-0.127996	-0.214428	-0.191546	-0.0639232
322224	-0.0579922	-0.0969952	-0.0906308	-0.0841898	-0.121272	-0.0879365	-0.0824497	-0.0778738	-0.09059	-0.0607439	-0.00154647	-0.0501302	-0.0813809	-0.0303037	-0.0496242	-0.0858799	-0.0631917	-0.119445	-0.0784279	-0.0483315	-0.0222105	-0.0374607	-0.0658674	-0.0516177	-0.112204	0.0040937	-0.000996915	-0.106423	-4.77552e-05	-0.0226676	-0.034683	-0.00760649	0.000400622	4.60851e-05	0.00683029	-0.061952	-0.0312751	0.00595663	-0.0389262	-0.052206	-0.0444586	-0.0664234	-0.0286783	-0.0420592	-0.0305955	-0.060486	-0.106132	-0.0572258	-0.0565656
325129	0.016544	-0.0212888	-0.0109688	0.00738525	-0.0138329	-0.0210361	0.00410116	-0.0394473	-0.0334758	-0.0525075	-0.0225778	-0.0469753	-0.047203	-0.0341675	-0.0460367	-0.0695688	-0.0434151	0.00800941	-0.0394859	0.0195432	0.0166956	-0.0231169	-0.0306198	0.0236673	-0.0319111	-0.0108578	-0.038411	0.0107826	-0.0670446	-0.0627633	-0.0197326	-0.0382597	-0.0401638	-0.026224	-0.0468665	-0.0610172	-0.0425154	-0.0353453	-0.0270653	-0.0186389	-0.0246516	0.00667962	-0.0110742	-0.0781328	-0.0404424	-0.0508842	-0.036957	-0.0388113	-0.0663782
329440	-0.0664139	-0.0896307	-0.037118	-0.0277603	-0.0743783	-0.0971239	-0.125302	0.106861	0.12744	-0.397728	-0.153864	-0.430196	-0.0881045	-0.123142	-0.235865	-0.126093	-0.108263	0.00239913	-0.0997168	-0.200491	-0.175109	-0.154638	0.178471	-0.0914904	-0.216049	-0.120914	-0.223293	-0.232339	-0.115596	0.101424	-0.0331485	-0.239378	0.0117847	-0.0505858	-0.0144853	-0.0898671	-0.249457	-0.290818	0.0250324	-0.0226995	0.00213053	-0.136286	-0.214032	-0.215078	-0.343483	-0.296759	-0.0175364	-0.129345	-0.237693
329844	-0.0571828	-0.108365	-0.0797719	-0.00919332	-0.0224676	-0.103638	-0.0743992	-0.0154178	0.00191441	-0.382249	-0.169685	-0.242298	-0.0255754	-0.198885	-0.242127	-0.0652192	-0.167411	-0.110704	-0.0163467	-0.0256077	-0.0542472	-0.0757882	-0.00220192	-0.0885702	-0.238861	-0.135739	-0.193034	-0.142836	-0.111066	-0.0834198	-0.10582	-0.151776	-0.0504071	-0.150567	-0.150978	-0.140716	-0.100998	-0.246526	0.00265	-0.0784529	-0.0906663	-0.0225466	-0.0783715	-0.230531	-0.107209	-0.224694	-0.0540052	-0.0568463	-0.0305803
330324	-0.0698198	-0.132331	-0.151946	-0.154416	-0.221209	-0.19444	-0.251793	-0.0996401	-0.0956554	-0.258538	-0.135159	-0.23106	-0.16683	-0.0577214	-0.208502	-0.155254	-0.0458621	-0.112367	-0.166116	-0.147808	-0.127713	-0.158597	-0.0159973	-0.00670974	-0.240011	-0.117225	-0.247948	-0.183821	-0.119413	0.0101483	-0.0398797	-0.10977	0.0485849	-0.0176859	-0.189799	-0.199327	-0.0362477	-0.183398	-0.0527454	-0.0179981	0.0446686	-0.0396829	-0.021757	-0.147966	-0.0721586	-0.0616164	-0.0246176	-0.0266989	-0.0992463
333330	-0.00114671	-0.0533759	-0.110957	-0.0454699	-0.0826964	-0.0474247	0.042646	-0.0633437	-0.0265293	-0.0436035	-0.0410634	-0.11783	0.0044066	-0.176227	-0.183029	-0.0337625	-0.0522574	0.0248999	-0.0735389	-0.0863947	-0.0889416	-0.139137	-0.0309587	-0.133826	-0.196069	0.0140157	-0.158118	-0.0534575	-0.251512	-0.0898976	-0.0459385	-0.215906	-0.0777752	-0.0529579	-0.144997	-0.0337738	-0.0504798	-0.0704693	-0.0178134	-0.0575105	0.00261435	-0.170248	-0.0576213	-0.0708221	-0.117859	-0.195795	-0.164485	-0.0868582	-0.125966
334635	-0.143724	-0.03378	-0.0785781	-0.10551	-0.121233	-0.0785626	-0.0194003	0.121824	0.111863	-0.0629558	-0.0884492	-0.0550619	-0.0753279	-0.0704146	-0.111531	-0.105287	-0.0730595	-0.0442411	-0.0896114	-0.0633352	-0.0239708	-0.115434	-0.0177302	0.0241325	0.0117598	-0.0430581	-0.105771	0.0393412	-0.0722237	-0.0202358	0.0632341	-0.0711228	0.0841907	-0.011828	-0.0489212	0.0493935	-0.065512	-0.135303	-0.0154408	0.0621341	0.0407741	-0.0581425	-0.0523921	-0.0463518	-0.113501	-0.0801388	-0.140963	-0.0577305	-0.0951784
336841	-0.03959	-0.0193382	-0.0818824	-0.0102769	-0.00212355	0.00648096	0.0155291	0.0119676	0.00293376	-0.248961	-0.0194054	-0.156638	0.000850284	-0.0680866	-0.133806	-0.0149876	-0.0260534	0.0245059	-0.0219666	0.00180814	-0.00300139	0.00617703	-0.0385833	0.00554681	-0.0741029	-0.0540355	-0.143359	-0.0812226	-0.172577	-0.0478799	-0.0686334	-0.140673	-0.0483171	-0.0273183	-0.0754333	-0.0635245	-0.0671084	-0.126495	0.0317719	-0.0427331	0.0457856	-0.0103756	0.0268734	-0.0482073	-0.118636	-0.16548	0.0153974	-0.0304839	-0.0128803
339847	-0.217796	-0.051404	-0.235712	-0.285987	-0.25676	-0.152329	-0.242501	-0.123007	-0.136465	-0.331791	-0.10965	-0.0400725	-0.199663	-0.0369206	-0.179265	-0.182452	-0.196831	-0.185767	-0.157097	-0.159266	-0.15284	-0.155809	-0.0987665	-0.277005	-0.112807	-0.175115	0.0547966	-0.221097	0.138854	0.174457	-0.0503311	-0.0836893	0.191936	0.104599	0.159951	-0.319414	-0.251776	-0.237377	-0.326099	-0.124906	-0.0718522	-0.217481	-0.24214	-0.272789	-0.136144	-0.2426	-0.295257	-0.153873	-0.0722917
341834	-0.0591078	0.0233763	-0.088292	-0.0680786	-0.0742134	-0.0374991	0.0382598	-0.0173058	-0.0403357	-0.203894	-0.271649	-0.283965	-0.0229127	0.0519715	-0.121759	-0.14234	-0.00702328	0.0559322	-0.0718404	-0.0268095	-0.000218958	-0.0274588	-0.0879404	-0.0370069	-0.296407	-0.127473	-0.117122	-0.18885	-0.0984	-0.0640934	-0.103684	-0.194079	-0.0656488	-0.00774793	-0.0366911	-0.0736534	-0.166906	-0.311463	-0.0638058	-0.0725745	-0.0586098	-0.0405197	-0.185252	-0.170576	-0.205277	-0.128451	-0.142738	-0.103641	-0.101661
342129	-0.028812	0.00640471	-0.0396168	-0.091752	-0.0834916	0.000371902	-0.0327993	0.0620569	0.0269453	-0.0456161	-0.0667859	-0.133693	-0.0752057	-0.0871729	-0.175043	-0.0473144	-0.0179407	-0.0581259	-0.0298623	0.00830783	-0.0370954	-0.077675	0.00897839	-0.014767	-0.0472062	0.0145478	-0.134358	0.00941254	-0.0998763	-0.0218443	-0.0202892	-0.0744957	0.0156426	0.0305234	0.0423894	-0.027809	-0.124548	-0.175754	-0.0359573	-0.0196083	0.0100455	-0.00303625	-0.0269385	-0.0590124	-0.0783192	-0.0174008	-0.0322752	-0.0219185	-0.0506117
346137	-0.0980766	0.0362434	-0.078631	-0.139658	-0.160387	-0.0749	-0.0741436	-0.0260562	-0.0549452	-0.225224	-0.0854462	-0.152196	-0.0196874	-0.040743	-0.183204	0.0494974	0.0246348	-0.0330013	0.00904221	-0.0787028	-0.052486	-0.0565983	-0.0154756	-0.0738819	-0.103156	-0.147208	-0.168698	-0.0724803	-0.0396593	-0.016397	-0.0255654	-0.0848731	0.0376135	-0.0214886	-0.0673074	-0.106456	-0.068233	-0.027915	-0.0486706	-0.0472561	-0.0219852	0.00025121	-0.0263314	-0.117264	-0.0302105	-0.022139	-0.0296507	-0.114185	0.0288815
346945	0.0134127	0.0557631	-0.0507885	0.0274456	0.019901	0.0545801	0.0485251	0.0672429	0.0730242	-0.214967	-0.177255	-0.310168	-0.0433866	-0.0899209	-0.201304	-0.0152464	0.00982094	0.0675774	0.00255767	0.00497605	-0.00464645	0.0777284	-0.0933503	-0.0358994	-0.246932	-0.152051	-0.163883	-0.21381	-0.119262	0.0177929	-0.0452949	-0.0954307	0.0803186	-0.0853714	0.00970736	0.0139823	-0.165268	-0.216894	0.0490664	0.0169666	-0.00664708	-0.0339622	-0.0829222	-0.105326	-0.106445	-0.0534246	0.016709	-0.0270345	-0.0804341
348545	-0.125867	0.0200206	-0.172991	-0.0614871	-0.113208	-0.0814638	0.00891178	0.0891632	0.0917212	-0.148329	-0.200429	-0.18146	-0.0476512	-0.0386156	-0.105418	-0.0468	-0.138807	-0.089614	-0.146638	-0.094437	-0.0528851	-0.0762719	-0.0177688	-0.120923	-0.159844	-0.0704777	-0.123417	-0.00369498	-0.144403	0.00513316	0.0689923	-0.000973677	0.119499	0.0284997	-0.0953986	-0.169054	-0.140182	-0.138234	-0.0969912	-0.060602	0.0551643	-0.0260337	-0.0620395	-0.14092	-0.190919	-0.125984	-0.0773338	-0.0349241	-0.0509426
349244	-0.149288	-0.0241219	-0.0111726	-0.13057	-0.136823	-0.0170227	-0.00039115	0.0762503	0.0767433	-0.0202425	-0.20211	-0.234169	-0.0622318	0.00649121	-0.0927458	-0.0539724	-0.0616736	-0.0299646	-0.0550621	-0.0302322	-0.022456	-0.037166	-0.0519447	-0.0296866	-0.0490401	-0.152757	-0.0580293	-0.0300617	-0.121126	-0.00692442	0.169109	-0.0686848	0.0503822	-0.0492011	-0.0109633	0.107905	0.0241729	-0.0621415	0.107476	0.0381135	0.0358197	0.0373801	-0.137353	-0.0725408	0.0667683	0.00321933	0.0449289	-0.0408074	0.0115724
350330	-0.163222	-0.0579418	-0.152831	-0.158542	-0.180625	-0.151791	-0.117821	0.0835594	0.0627786	-0.149307	-0.213886	-0.294173	-0.128192	-0.0595349	-0.253288	-0.138056	-0.116095	-0.158482	-0.117531	-0.142799	-0.195171	-0.186949	-0.0856094	-0.144653	-0.101103	-0.138572	-0.188392	-0.0818772	-0.201032	0.0155524	-0.106655	-0.18616	0.0381269	-0.131646	-0.0892497	-0.22871	-0.169552	-0.138463	-0.00953811	-0.116566	-0.0202329	-0.082796	-0.0659097	-0.280059	-0.102827	-0.13159	-0.150505	-0.166667	-0.136432
352132	0.00966611	-0.108988	-0.0446136	-0.0306824	-0.0615229	-0.088493	-0.0707959	-0.00409647	0.0302912	-0.117271	-0.131907	-0.117332	-0.0769758	-0.0807435	-0.0969631	-0.104283	-0.0647436	-0.0948976	-0.100414	-0.0855251	-0.111442	-0.0721285	-0.0925404	-0.00500884	-0.121518	-0.033545	-0.127278	-0.129585	-0.0271321	0.00319656	0.0200028	-0.0505651	0.0128001	-0.01972	0.0326529	-0.0794305	-0.113429	-0.123041	-0.00784844	-0.146089	-0.045543	-0.131001	-0.105395	-0.174187	-0.111413	-0.209826	-0.106795	-0.107262	-0.0858968
352738	-0.148549	-0.0533078	-0.237027	-0.215005	-0.219067	-0.131173	-0.107868	0.013395	-0.0141102	-0.150717	-0.156308	-0.298283	-0.172725	0.0565022	-0.103381	-0.15299	-0.0986197	-0.10215	-0.201662	-0.197962	-0.105035	-0.128887	-0.0848132	-0.0123177	-0.199884	-0.00679002	0.0361556	-0.115065	-0.0192558	0.131397	0.0193447	-0.0447509	0.159732	0.0508651	0.0414422	-0.16385	-0.187348	-0.213559	-0.116334	-0.0319911	-0.0107594	-0.199154	-0.064424	-0.125071	-0.18957	-0.104865	-0.130132	-0.115612	-0.177416
353740	-0.116574	-0.186484	-0.117121	-0.131089	-0.139822	-0.0955791	-0.12736	0.0742289	0.0743329	-0.214212	-0.186426	-0.328925	-0.0840097	-0.0828435	-0.17956	-0.192915	-0.246	-0.139689	-0.180411	-0.153812	-0.00114179	-0.134241	-0.0266809	-0.00516851	-0.13802	-0.0768392	-0.258275	-0.154749	-0.170071	0.107874	0.0552518	-0.13862	0.0643118	0.000698919	0.0439499	-0.212905	-0.248291	-0.324225	-0.0230626	-0.0167806	0.0267569	-0.196807	-0.0111918	-0.182553	-0.224964	-0.266843	-0.251891	-0.264766	-0.296929
356948	0.00864555	0.0190582	-0.12541	-0.0372852	-0.0288198	-0.00052294	0.00888752	0.0361527	0.0350061	-0.00274576	-0.148677	-0.150482	-0.0303178	-0.0768884	-0.131854	-0.0195046	-0.00594983	-0.130478	0.00783031	-0.00378931	-0.0134457	-0.0278299	-0.0248384	-0.00277537	-0.0916816	-0.0191134	-0.125091	-0.0485155	-0.175338	-0.123867	-0.101825	-0.091857	-0.0916831	-0.109161	-0.128451	-0.011537	-0.0627237	-0.0989177	0.0285239	-0.0542924	-0.00397862	-0.0250617	0.047013	-0.00351733	-0.06247	-0.0535352	-0.0441494	-0.0657481	-0.0339984
358144	-0.100278	-0.0580931	-0.0648896	-0.116103	-0.150244	-0.128805	-0.207978	0.0962824	0.107741	-0.243093	-0.0683346	-0.125994	-0.161365	0.0573117	-0.111387	-0.191861	-0.100439	-0.0940617	-0.214029	-0.127135	-0.147872	-0.0894528	-0.00155312	0.0903108	-0.204897	-0.0549533	-0.146063	-0.0898361	-0.072039	0.09603	0.0245366	0.0222468	0.0984089	0.118465	-0.00846816	0.000483242	-0.0279911	-0.0957361	0.0567735	0.00628353	-0.0529153	0.0260188	-0.178703	-0.192191	-0.0610494	-0.224391	0.0163939	-0.0284767	-0.0912021
360030	0.0877577	0.0230991	-0.248637	-0.0380159	-0.0228273	-0.0252275	0.130519	-0.0441688	-0.0384597	0.00216285	0.0676182	0.0145627	-0.0273589	-0.24142	-0.333514	0.0589442	0.0209167	-0.0244029	-0.0105294	-0.0598768	-0.0289763	-0.0794651	0.03675	0.0442566	0.0340824	0.0336744	-0.389733	-0.0784017	-0.22431	-0.22927	-0.140104	-0.329863	-0.203561	-0.236429	-0.270976	0.014987	0.0279846	-0.0461817	0.086638	-0.0664248	0.0472662	0.15454	0.0630161	0.0686059	-0.222571	-0.3658	0.101754	0.149921	0.0365826
361234	-0.0813446	-0.212358	-0.224924	-0.128424	-0.166315	-0.180626	-0.19401	-0.105131	-0.0899758	-0.276201	-0.218028	-0.281157	-0.132298	0.0907236	-0.00443201	-0.206785	-0.200044	-0.256095	-0.208628	-0.182552	-0.153025	-0.158042	-0.181453	-0.0968151	-0.232712	-0.127625	0.071848	-0.0243086	0.0973627	0.230564	0.0552402	0.0824826	0.185029	0.15684	0.171814	-0.225559	-0.162236	-0.230613	-0.0928567	-0.199835	-0.0536652	-0.159718	-0.13226	-0.3053	-0.257274	-0.180715	-0.115147	-0.207084	-0.205291
361941	-0.0246368	-0.0706486	-0.171191	-0.143205	-0.129528	-0.0546364	-0.0860181	0.0211137	0.0546448	-0.239166	-0.125455	-0.312524	-0.0884639	0.0351565	-0.191107	-0.0933208	-0.0737897	-0.0671042	-0.0831963	-0.0430666	-0.0709771	-0.0494383	-0.0791914	-0.0200866	-0.310449	-0.117641	-0.200837	-0.161642	-0.193373	0.110452	0.0274062	-0.127047	0.115464	0.0427103	-0.0896652	-0.0307543	-0.144646	-0.279683	-0.0293629	-0.0326111	0.00857233	-0.0593485	-0.107109	-0.193472	-0.1639	-0.0913782	-0.0797169	-0.0648164	-0.0553256
365343	-0.0213005	0.0466446	-0.226048	-0.0944885	-0.132953	-0.120157	-0.0125573	-0.00371613	0.0311211	-0.249909	-0.0083817	-0.210838	-0.0766517	-0.168173	-0.332818	-0.115987	-0.0506212	-0.0318823	-0.072643	-0.0272615	-0.0398397	-0.0801627	0.0179487	-0.0102128	-0.135442	0.0180972	-0.26964	-0.244871	-0.0933676	-0.038678	-0.135551	-0.227076	0.0209431	-0.208438	-0.309908	-0.104258	-0.21284	-0.285028	-0.00808462	-0.133004	0.0153097	0.0271587	-0.0478719	-0.324936	-0.315938	-0.347609	-0.0556454	-0.270157	-0.0105713
366042	-0.0315503	-0.0161163	-0.0378652	-0.023105	0.016192	-0.0258124	0.00403925	-0.0296341	-0.0375847	-0.228582	-0.170822	-0.3138	0.0141503	-0.105309	-0.164091	-0.0258662	-0.00856971	-0.030272	0.0259642	0.00755087	-8.27706e-06	0.0122253	-0.0353009	-0.0453453	0.017357	0.0402017	-0.22764	-0.0921505	-0.0419648	0.0151107	-0.130482	-0.0858062	-0.0357542	-0.0212653	-0.131807	-0.0706433	-0.0417533	-0.168998	-0.0626471	-0.137234	-0.0973709	-0.103362	-0.0900862	-0.270657	-0.166537	-0.233025	-0.176473	-0.0841661	-0.102312
366446	-0.0464135	-0.0969027	0.00721553	-0.11486	-0.153496	-0.138997	-0.151478	0.0164743	-0.0104246	-0.0128307	-0.0824306	-0.00672289	-0.119311	0.0692587	0.040826	-0.127925	-0.12279	-0.115019	-0.0944741	-0.108352	-0.12097	-0.122355	-0.0575402	0.0554297	-0.00983464	0.0184933	-0.0590502	0.0715809	-0.0203789	0.0531567	0.00584806	-0.0372184	0.0544443	0.0404129	0.0196682	-0.00668044	-0.105794	-0.121339	-0.0453386	-0.00787676	-0.00845519	-0.131002	0.0388019	-0.0942388	-0.162468	-0.0875844	-0.145499	-0.10768	-0.0897918
368551	0.00414544	0.0991695	0.01532	0.0518587	0.052998	0.0280937	0.0462129	0.208489	0.216364	-0.0609507	-0.187516	-0.0424759	0.115122	-0.129907	-0.178017	-5.3816e-05	-0.143879	0.0150414	0.0132391	-0.00610249	-0.0186296	0.0274595	0.107053	-0.14264	-0.118573	-0.122493	-0.134813	-0.101448	-0.164194	-0.00853608	-0.037428	-0.226799	-0.00939396	-0.0933803	-0.126137	0.0387159	-0.113954	-0.229236	0.0760561	-0.0157506	0.0259282	-0.0166434	-0.0485222	-0.114199	-0.228558	-0.135437	-0.0689905	-0.0747548	-0.0521203
368753	-0.0685124	-0.0205497	-0.0310046	-0.0598319	-0.106965	-0.0763244	0.0576762	0.0387305	0.0670079	-0.11705	-0.071252	-0.0980505	-0.0771098	-0.042039	-0.034142	-0.063365	-0.118129	-0.042615	-0.0381383	-0.075404	-0.0230156	-0.0462965	-0.0294388	-0.000149122	-0.148055	0.0181955	-0.0286289	-0.0763528	-0.0374108	0.0671668	0.0407979	-0.106388	0.0439777	-0.0270451	0.0139959	-0.0637136	-0.101385	-0.0898671	-0.0209972	-0.0569556	0.0395979	-0.0420669	-0.0503723	-0.173202	-0.171606	-0.181632	-0.127262	-0.0499175	-0.0861521
371843	-0.18491	-0.0518322	-0.175785	-0.136973	-0.189213	-0.16441	-0.116298	0.114799	0.133442	-0.163387	-0.197758	-0.189885	-0.107588	-0.108715	-0.226791	-0.14185	-0.183015	0.0471675	-0.0362908	-0.18769	-0.0984623	-0.115088	0.128929	-0.018801	-0.095905	0.0382851	-0.150166	-0.177195	-0.247674	0.107514	0.0936348	-0.319929	0.105956	0.0579434	-0.0415027	-0.0943604	-0.19537	-0.293423	-0.0654729	-0.171343	0.0241579	-0.113008	-0.196279	-0.207203	-0.111874	0.0898678	0.0904899	-0.26974	-0.106549
376247	-0.0613786	-0.016879	-0.249309	-0.0907485	-0.100176	-0.0762328	-0.0766949	-0.056292	-0.0642681	-0.273048	-0.142212	-0.28098	-0.0823694	-0.119762	-0.128463	-0.145751	-0.15546	-0.190372	-0.105966	-0.13239	-0.0829007	-0.0850991	-0.0289964	-0.0905898	-0.0929497	-0.0645104	-0.106663	-0.170045	-0.0616811	0.0504288	-0.0258518	-0.119487	0.0376273	-0.016477	-0.0150938	-0.201952	-0.150809	-0.126329	-0.0623126	-0.105942	-0.0369985	-0.0764515	-0.117704	-0.242266	-0.207739	-0.270429	-0.103141	-0.131049	-0.251264
377451	0.0680442	0.0142293	-0.0182386	0.00870411	0.0139218	-0.00044409	-0.00977442	-0.0656915	-0.0338959	-0.072626	-0.189297	-0.178647	0.0265374	-0.135247	-0.0619651	-0.015744	-0.0257845	-0.0566328	-0.0245566	-0.0142619	-0.0408799	-0.0174924	-0.00297999	0.00952141	-0.18982	-0.0316578	-0.202184	-0.0421911	-0.197582	-0.138785	-0.15003	-0.0794818	-0.133049	-0.142248	-0.160735	-0.253461	0.0017369	-0.0829405	-0.0338261	-0.0683992	-0.00766499	-0.079459	-0.00808058	-0.0353517	0.017081	0.009977	-0.131115	-0.0632832	-0.00930816
378756	-0.0935877	-0.0166147	-0.1242	-0.0999451	-0.107886	-0.0165021	-0.0718885	-0.0256778	0.0296667	-0.114412	-0.188517	-0.126319	-0.077136	-0.0356931	-0.0781088	-0.0856536	0.0313079	-0.0840959	-0.0598289	-0.0271363	-0.0279745	-0.0333585	0.00377045	0.0168877	-0.093049	-0.0778626	-0.0468664	-0.0618765	0.0450605	0.0379655	-0.028202	-0.133077	0.0215696	0.0336508	0.069465	-0.0996159	-0.0677488	-0.164357	-0.0404979	-0.073686	0.0118595	-0.0847506	-0.0708492	-0.196469	-0.143196	-0.116414	-0.0210624	-0.0619793	-0.129601
378857	-0.071812	0.154147	-0.0597447	0.0455596	-0.0130873	-0.0236539	0.0373415	0.0809416	0.116374	-0.424897	-0.219273	-0.29556	0.0217834	-0.0177023	-0.0937203	0.077886	0.00360969	0.0470386	0.0177763	-0.0163331	-0.0461408	-0.0700931	0.0845433	0.0933867	-0.396874	-0.315042	-0.268871	-0.180285	-0.123158	-0.0167935	0.116017	-0.256323	0.0614287	0.0264836	-0.0277747	-0.0761692	-0.0914161	-0.211899	0.0873588	0.0604577	0.0266361	-0.0384504	-0.156798	-0.269561	-0.242227	-0.196344	-0.0985857	-0.0817698	-0.0019063
379657	-0.111129	-0.129313	-0.197837	-0.121245	-0.105343	-0.0434507	0.0315713	-0.0248081	-0.0118998	-0.228554	-0.121835	-0.304436	-0.155187	-0.0671498	-0.0934694	-0.182003	-0.0899496	-0.0455633	-0.125981	-0.000250162	0.0177423	-0.0421794	-0.101058	0.0391085	-0.00229858	-0.198149	-0.0463265	-0.217565	-0.0966258	-0.00523658	-0.0673371	-0.0177108	-0.00224353	-0.0259941	-0.0224248	-0.0743548	0.00632588	0.00275273	-0.0118609	0.0263029	0.0284191	-0.0837195	-0.0463519	-0.19746	-0.0406159	-0.0998209	0.010376	-0.106947	-0.0977928
380036	-0.103313	-0.0107259	-0.148953	-0.0986972	-0.134172	-0.0868138	0.0653188	0.0841039	0.0940126	-0.272383	-0.266042	-0.224637	-0.0851072	-0.130479	-0.237018	-0.111102	-0.0496527	0.0337907	-0.0693933	0.000217807	-0.0185924	-0.0288952	0.0044753	-0.0301218	-0.233844	-0.12492	-0.170305	-0.199033	-0.140821	-0.119678	-0.0462887	-0.322027	-0.0716425	-0.0814641	-0.133228	-0.0539723	-0.185888	-0.271432	-0.0478271	-0.00667126	0.030309	-0.000581344	-0.077018	-0.123568	-0.111084	-0.145388	-0.109767	-0.055109	-0.0692231
381038	-0.0849449	-0.0353545	-0.366682	-0.0638956	-0.0298039	-0.0780842	0.0965127	0.0239155	0.0561971	-0.171764	-0.0704192	-0.41203	-0.0458968	-0.21765	-0.1298	-0.0868729	-0.2754	0.0701709	0.0245523	-0.14252	0.0649086	-0.0298699	0.0455836	-0.0623104	-0.406278	-0.124812	-0.392875	-0.353312	-0.0137658	-0.0236241	0.124051	-0.274874	0.25353	-0.297917	-0.358917	-0.0734627	-0.128812	-0.285278	-0.0427138	-0.05959	0.0190189	-0.0906889	0.0198791	-0.211911	-0.306571	-0.30665	-0.158159	-0.0655508	-0.0374649
381543	-0.0437616	0.0115385	0.0372329	-0.0351031	-0.0891806	-0.0745825	-0.0414248	0.0563342	0.0143434	-0.185239	-0.256143	-0.343508	-0.0723271	-0.0112688	-0.174241	-0.0777101	-0.108428	-0.0435974	-0.0379192	-0.109177	-0.0214414	-0.0540246	0.0259357	-0.0799117	-0.00634514	-0.118491	-0.0972364	-0.0602139	-0.106729	0.0849586	0.148369	-0.0718195	0.171736	0.120929	0.159314	-0.171403	-0.208981	-0.310628	-0.0496812	-0.148634	0.0794755	-0.0893045	-0.166631	-0.277381	-0.160552	-0.169205	-0.0938502	-0.112787	-0.054683
382242	-0.222561	-0.155414	-0.35181	-0.109788	-0.0599156	0.0578739	-0.0966179	0.0230326	0.0608873	-0.309654	-0.215557	-0.204645	-0.129506	0.0151398	-0.251252	-0.0948097	-0.119896	-0.119222	-0.00681671	-0.0595984	0.0512916	0.0421766	-0.147402	-0.0757608	-0.229029	-0.0459675	-0.159124	-0.290642	-0.165758	0.18966	-0.108469	-0.140055	0.128655	0.104795	-0.0442232	-0.253232	-0.391448	-0.378013	-0.314416	-0.214586	-0.156023	-0.381368	-0.226776	-0.382006	-0.406704	-0.300439	-0.277544	-0.298071	-0.340747
385046	-0.0112551	0.0435348	-0.257967	-0.0434819	-0.0393942	0.0166898	-0.0111651	0.0373269	0.0148529	-0.189255	0.00181359	-0.209683	0.000512939	-0.269487	-0.404603	0.0695957	0.127981	0.124193	0.0670898	0.0890445	0.0218095	-0.00453397	0.0703525	-0.107938	-0.350592	-0.17068	-0.283111	-0.380815	-0.264125	-0.119514	-0.102561	-0.245034	-0.0871938	-0.105756	-0.17759	-0.121278	-0.05008	-0.125839	-0.0272022	-0.0403851	-0.0344083	0.0792576	-0.175908	-0.35837	-0.40627	-0.19926	0.149098	0.105532	0.0116734
385450	0.0909935	-0.083251	0.0660492	0.0596066	0.143643	0.0138619	-0.0147052	-0.0732113	-0.0987546	-0.070669	-0.207232	-0.258645	-0.0462216	0.0107167	0.102876	-0.122026	-0.100553	-0.302724	0.0036223	-0.137684	-0.0942455	-0.0287933	-0.217772	0.103516	0.0330125	-0.19926	-0.0796333	-0.288511	0.0354343	-0.0295218	-0.0647605	0.218449	-0.0385674	-0.0769083	-0.103973	0.0157043	0.00315022	0.0659889	0.0500041	0.00208048	0.0110324	-0.157507	0.00436397	-0.0156639	-0.123736	0.161463	-0.134832	-0.193309	-0.195212
386250	-0.0536742	0.00154282	-0.032799	-0.0640954	-0.0569992	-0.0359652	-0.0156331	-0.033952	-0.0615824	-0.245191	-0.0542795	-0.260216	-0.0471433	-0.0278411	-0.0864935	-0.0634692	-0.0491807	-0.0310025	-0.0767381	-0.00362766	-0.03668	-0.0159202	-0.0348885	-0.0658144	-0.114333	-0.173979	-0.107019	-0.136277	-0.0535339	0.0135725	0.00600343	-0.0166491	0.0076078	-0.0101975	-0.0646235	-0.0664168	-0.100472	-0.13435	-0.0276479	-0.11434	-0.0668163	-0.0518647	-0.0895967	-0.189727	-0.115102	-0.0786304	-0.0243214	-0.0155882	-0.0728095
387959	-0.130156	-0.165075	-0.294726	-0.211109	-0.198152	-0.178096	-0.139795	0.0331688	0.0144585	-0.411439	-0.273022	-0.20886	-0.139554	-0.144157	-0.236121	-0.189997	-0.16317	-0.0299585	-0.136973	-0.160928	-0.131732	-0.067655	-0.157967	-0.0280124	-0.2643	-0.115244	-0.236887	-0.0899318	-0.109951	0.116195	-0.0103882	-0.203714	0.142776	-0.0688171	-0.12422	-0.103637	-0.0911682	-0.336451	0.00142175	-0.0582281	-0.00832599	-0.0423656	-0.294556	-0.26451	-0.207535	-0.303149	-0.113577	-0.0990378	-0.1265
389357	-0.211479	-0.00449866	-0.300867	-0.258414	-0.241931	-0.138869	-0.187219	0.0611788	0.0719768	-0.467755	-0.118771	-0.367387	-0.172045	-0.204507	-0.259045	-0.120281	-0.11964	-0.132128	-0.0498838	-0.0862901	-0.0397995	-0.0506447	0.0370359	0.0998018	-0.320142	0.0998605	0.031445	-0.152831	-0.292882	0.106053	-0.067904	-0.137005	0.114984	0.0254947	0.0663646	-0.10455	-0.316533	-0.359022	-0.235225	-0.080855	0.00207041	-0.0707015	-0.332067	-0.472789	-0.332206	-0.275921	-0.207172	-0.178473	-0.160625
390645	0.0132169	0.0460075	-0.0935382	-0.0374827	-0.00612166	-0.00274221	0.0161009	0.0934837	0.110602	-0.0499425	-0.114147	-0.189508	0.0211111	-0.196465	-0.229323	-0.000162258	-0.0621425	-0.0529199	-0.0248517	0.0288985	0.0222272	0.00868866	0.0509026	0.0669084	0.0433656	-0.106659	-0.140287	0.00483917	-0.0676885	-0.0586737	-0.146176	-0.0953483	-0.101915	-0.0877129	-0.0528484	-0.0308017	-0.0567168	-0.118499	0.028269	-0.0460472	0.0111449	0.0230753	0.00466166	-0.111436	-0.119324	-0.0793177	-0.139091	-0.196604	-0.32428
391748	-0.108964	0.0149314	-0.100196	-0.072415	-0.0416813	-0.019742	-0.0243023	0.0139863	0.0351	-0.171206	-0.310763	-0.511886	-0.0305594	-0.200575	-0.209125	-0.0580409	-0.0756995	-0.043656	-0.0488949	0.0228787	-0.0294302	0.00416765	0.0606547	0.0249039	-0.111958	-0.17332	-0.227947	-0.331785	-0.131643	0.0188128	-0.160709	-0.0271523	-0.0898962	-0.103205	-0.185386	-0.16237	-0.0423608	-0.142328	0.0323077	0.00210255	-0.00539029	-0.0232012	-0.0301279	-0.208514	-0.0814791	-0.175213	-0.137156	-0.0659613	-0.144342
392447	-0.0880487	-0.0449919	-0.17711	-0.0889917	-0.0803493	0.021511	0.0314441	0.0469092	0.0740188	-0.122323	-0.0867446	-0.264237	-0.123257	-0.0825861	-0.131357	-0.0806419	-0.0959171	0.0248969	-0.0335228	-0.0473372	0.0353564	0.0458785	0.0380526	-0.0235776	-0.191629	-0.178172	-0.216442	-0.0734727	-0.0806675	-0.0372957	0.0116398	-0.137925	0.0599628	-0.0551237	-0.0689936	-0.0142672	-0.0914217	-0.173367	-0.0106836	-0.129913	-0.013005	-0.030435	-0.0916472	-0.130207	-0.123932	-0.0285677	-0.0269455	-0.032731	0.00469334
392750	-0.119864	-0.199355	-0.437925	-0.0800005	-0.0188351	-0.020361	0.0302266	-0.00653157	0.0115894	-0.363302	0.151205	0.0537138	-0.0701042	-0.114779	-0.287023	-0.0614929	-0.322121	-0.0378778	0.0838732	-0.0394569	0.0828601	0.0181029	-0.00608148	-0.145469	-0.259376	0.0861388	-0.238059	-0.406136	-0.27479	0.0938162	-0.0634063	-0.223041	0.0953166	0.123014	-0.0778394	-0.144955	-0.438333	-0.430589	0.0989144	-0.286875	-0.0692497	-0.0445684	-0.229484	-0.53519	-0.432173	-0.307743	-0.278342	-0.385778	-0.167264
393247	-0.0418185	-0.00430821	-0.241103	-0.0799078	0.0443227	0.0109588	-0.0106035	-0.0485875	-0.0458429	-0.0696512	-0.0404816	-0.153902	0.0062983	-0.0247922	-0.161477	0.0473335	0.0198373	0.0718046	0.0221548	0.0217232	0.0597697	0.028217	-0.0552318	-0.0811933	-0.160134	-0.0874996	-0.0105303	-0.209062	0.022189	-0.0202045	-0.13927	-0.0382319	-0.0208632	0.101795	0.0291362	-0.0275351	-0.0323316	-0.0810052	0.0495073	-0.0032152	0.021808	-0.00567637	-0.0733939	-0.151541	0.0292452	-0.0291616	0.0193318	0.0125835	0.0335389
393550	-0.0687772	-0.0603392	-0.0740045	-0.104667	-0.114579	-0.143721	-0.0972297	0.0163306	0.071284	-0.155762	-0.16459	-0.142682	-0.0952547	-0.0381458	-0.0571493	-0.136684	-0.10191	-0.11966	-0.11686	-0.155865	-0.091452	-0.132303	-0.0240147	-0.00669568	-0.122875	-0.0743054	0.0055141	0.00499852	-0.0363576	0.083398	0.0532961	-0.0444634	0.0534844	0.0368484	0.0203115	-0.152398	-0.116659	-0.140358	-0.0292211	-0.00603583	0.0455566	-0.0860057	-0.049618	-0.0447622	-0.124254	-0.135506	-0.141593	-0.100875	-0.111555
394956	-0.0738818	-0.021108	0.0365488	0.0179466	0.00330141	-0.0429764	0.0731248	0.174357	0.184376	-0.366209	-0.134662	0.0495229	-0.0355008	-0.139427	-0.242128	-0.0151863	-0.0859806	-0.289897	0.0151343	-0.0973854	0.037079	-0.0153037	0.124003	0.00274255	-0.269857	-0.188931	-0.0582542	-0.281325	-0.149609	0.0484752	0.0700485	-0.193431	-0.00506643	-0.101895	-0.104813	-0.0902356	-0.2643	-0.27316	0.069421	0.0789892	0.0253191	-0.0818018	-0.177567	-0.233175	-0.305389	-0.337634	-0.042332	-0.167834	-0.122011
395251	-0.00777907	-0.0142259	-0.0601844	-0.0280739	0.0300301	-0.0224808	-0.0447037	-0.00413305	0.00839785	-0.222867	-0.143506	-0.161388	0.00900841	-0.122037	-0.107962	0.0201031	-0.017611	-4.33514e-05	-0.0330642	-0.00735766	-0.054406	0.0191245	0.00308443	-0.0617045	-0.236434	-0.114019	-0.127578	-0.1754	-0.117834	-0.0697268	-0.0162852	-0.0150563	-0.0111735	-0.0751504	-0.0937811	-0.0706483	-0.0792668	-0.14705	-0.0174308	-0.0636791	-0.0171184	-0.0636956	-0.0893657	-0.218638	-0.13177	-0.196929	-0.00769879	-0.0316409	-0.0586542
395756	-0.0956658	0.0156551	-0.215887	-0.095551	-0.050543	-0.0247999	0.0313306	0.0960626	0.14248	-0.0131004	-0.150696	-0.14788	-0.0747378	-0.185769	-0.344531	-0.0148254	-0.0317036	-0.031463	-0.0179894	-0.00827109	-0.00706863	-0.0864699	-0.0544082	-0.0471647	-0.209053	-0.121994	-0.274224	-0.198299	-0.296178	-0.0697226	-0.120066	-0.123194	-0.14855	-0.0906875	-0.165152	-0.200108	-0.225297	-0.171005	0.0069734	-0.0192476	0.0280848	-0.106271	0.0551132	-0.111762	-0.301998	-0.221457	-0.0382431	-0.124721	-0.104425
395958	-0.0463735	-0.0590437	-0.144034	-0.0525579	-0.0998281	-0.117784	-0.132118	0.042036	0.0743412	-0.195856	-0.05776	-0.0102423	-0.0568835	-0.0492511	-0.13741	-0.117296	-0.125158	-0.155783	-0.0978634	-0.116403	-0.0888224	-0.110694	-0.00694376	0.0536927	-0.106071	-0.114459	-0.175949	0.000913492	-0.0846631	-0.0152363	-0.0401332	-0.0123006	0.0497045	-0.0277155	-0.0706989	-0.0738964	-0.130029	-0.175664	-0.028107	0.0170946	0.0244205	-0.0811854	-0.0317954	-0.195323	-0.194938	-0.192501	-0.101757	-0.13782	-0.159579
397154	-0.110927	-0.152386	-0.104897	-0.138541	-0.174958	-0.126583	-0.210078	0.0234617	0.0507543	-0.196661	0.00976325	-0.195716	-0.172931	0.0194074	-0.189856	-0.188776	-0.0829439	-0.104103	-0.153416	-0.241245	-0.199142	-0.180662	-0.0910426	0.0557191	-0.232374	-0.167288	-0.0837814	-0.0941282	-0.0815998	0.061124	-0.0491295	-0.217608	0.127173	0.106684	-0.000504922	-0.109154	-0.196173	-0.204274	-0.0845141	-0.0479321	-0.0340631	-0.199698	-0.061133	-0.19586	-0.107168	-0.180752	-0.165818	-0.157109	-0.122531
397760	-0.0566175	-0.0102939	-0.217133	-0.164325	-0.162303	-0.00854355	-0.0506919	-0.00707405	-0.0194789	-0.238504	-0.10655	-0.288725	-0.067712	-0.0988514	-0.0601701	-0.0147193	-0.0771438	-0.0372904	-0.020733	-0.0233081	-0.00115469	0.0602026	-0.0128567	-0.113807	-0.242374	0.0525033	0.0449521	-0.159493	0.0963672	0.188923	-0.0755892	-0.0489202	0.143668	0.120772	0.129298	-0.166407	-0.192733	-0.191927	-0.161209	-0.163781	-0.0248295	-0.141815	-0.125857	-0.211571	-0.276411	-0.189315	-0.186035	-0.067146	-0.204745
397861	-0.178256	-0.0231068	-0.106765	-0.179617	-0.168879	-0.113881	-0.153121	-0.0480379	-0.0688916	-0.0212534	-0.0440445	-0.115255	-0.164212	-0.0633329	-0.171713	-0.0761512	-0.0600364	-0.172682	-0.0841223	-0.0726475	-0.150823	-0.118235	-0.0204329	-0.0303703	-0.0331631	-0.0262713	-0.11812	-0.00494469	-0.0924665	-0.0809119	-0.0446909	-0.0676481	-0.00269568	-0.0521232	-0.0360927	-0.0610111	-0.0580004	-0.0130022	-0.111742	0.0584561	-0.0200648	-0.0724576	-0.0735687	-0.143513	-0.0399918	-0.166056	0.0220102	-0.0612276	0.010677
401422	0.068705	-0.0662343	-0.102446	-0.0638489	-0.125686	-0.0980565	-0.112213	-0.0249635	-0.0383376	-0.0721118	-0.0154429	-0.0683288	-0.0464561	-0.113009	-0.232866	-0.0787395	0.0886227	-0.140272	-0.09183	-0.0456893	-0.0582902	-0.187767	-0.0111054	0.0734783	-0.068727	-0.137564	-0.148113	-0.0793043	-0.0894142	-0.0781957	-0.0443475	-0.183735	-0.0560921	-0.0241028	-0.103862	-0.0404483	-0.0650561	-0.101898	-0.0605956	0.0110402	0.00247176	-0.10339	-0.0230514	-0.137755	-0.171169	-0.149017	-0.0738957	-0.0282992	-0.149422
406432	0.0183504	-0.0328895	-0.136822	-0.0536439	-0.0364724	-0.0246478	0.012255	-0.0462478	-0.0708425	-0.0898558	-0.0421881	-0.128376	-0.0438543	-0.0244236	-0.121123	-0.0103546	-0.045873	-0.0367804	-0.0387782	-0.0181222	-0.0448665	-0.079054	-0.0586637	-0.081895	-0.124386	0.0105171	-0.227127	0.0116771	-0.15195	-0.0338128	-0.0518759	-0.0346647	0.0185892	-0.0206298	-0.109339	-0.0632672	-0.10722	-0.149534	-0.0602178	-0.0862759	-0.0552838	-0.0558228	-0.035586	-0.122076	-0.0758022	-0.0651641	-0.0962052	-0.0385465	-0.0507052
406836	0.0204381	-0.0900358	-0.156261	-0.0882046	-0.0581451	0.0610868	0.030764	-0.129074	-0.0945745	-0.145241	0.0439376	-0.0941833	-0.157229	-0.120525	-0.131689	-0.00873301	-0.0901027	-0.0263446	-0.00176928	0.09431	0.0420602	-0.0155762	-0.0700485	-0.021283	-0.205305	0.0545543	-0.10796	-0.126128	-0.0485491	0.0533725	-0.264421	-0.0982359	-0.0383709	-0.0192555	-0.0349752	-0.168195	-0.169942	-0.237725	-0.0926302	-0.198654	-0.0756459	-0.0355002	-0.0199253	-0.161476	-0.0821137	-0.16716	-0.119439	-0.0167393	-0.0933714
412528	-0.109593	-0.0765189	-0.0665807	-0.154366	-0.186826	-0.1749	-0.0763209	-0.0719745	-0.0922695	-0.0976542	-0.115605	-0.0210422	-0.0903347	0.0100674	-0.0686133	-0.128586	-0.122557	-0.115699	-0.0740976	-0.141857	-0.0976081	-0.130621	-0.111759	-0.0668489	-0.0203384	-0.0129457	-0.0475535	-0.0618307	-0.0927118	0.0143107	0.0326433	-0.0143998	0.0299316	-0.00200591	-0.0386089	-0.0890221	-0.0924558	-0.0672906	-0.0475144	-0.115806	-0.0363723	-0.115857	-0.0421517	-0.0882351	-0.215264	-0.171745	-0.222048	-0.131695	-0.108488
413934	-0.0619964	-0.0623	-0.226968	-0.123853	-0.162955	-0.152882	-0.11929	0.0144156	0.0922467	-0.284122	-0.302198	-0.387478	-0.10997	0.0504661	-0.222774	-0.131527	-0.26992	-0.107455	-0.0895346	-0.114945	-0.17279	-0.130876	-0.0569409	-0.0456382	-0.41017	-0.143169	-0.041687	-0.442892	-0.245673	0.160023	0.107871	-0.160477	0.226218	0.173009	0.0754383	0.078214	-0.117696	-0.221424	-0.00462196	0.00139302	0.0131266	-0.0477032	-0.173028	-0.358742	-0.304321	-0.361481	-0.077471	-0.0514471	-0.285784
414229	-0.102714	-0.0551213	-0.0888362	-0.0153546	-0.0388062	-0.0580434	-0.000891957	0.0746612	0.047109	0.0152649	-0.142833	-0.126375	-0.0197095	-0.0870526	-0.100236	-0.0280492	-0.011888	0.000274402	-0.00775902	-0.072532	-0.0646482	-0.0870239	-0.0729366	-0.119315	-0.148412	-0.139576	-0.146866	0.0337016	-0.0337116	0.00708808	0.0886735	-0.144005	0.032873	-0.00588837	-0.0362203	-0.163293	-0.199523	-0.223638	-0.0957852	0.0452722	0.0888344	-0.00380649	-0.10179	-0.136385	-0.143576	-0.122	-0.0141235	-0.0149302	-0.0312712
415837	0.0981177	-0.061622	0.129066	0.14802	0.220849	0.215932	0.182029	-0.0187497	7.84871e-05	0.0716512	-0.205183	-0.239635	0.225605	-0.191939	-0.0941489	0.28565	-0.0808131	0.0186799	0.198838	0.219042	0.107582	0.109397	-0.0784589	-0.0942718	-0.0593705	-0.244595	-0.127893	-0.0474278	-0.313003	-0.239121	-0.14749	-0.183043	-0.248023	-0.250925	-0.256158	-0.147988	-0.0352481	-0.170395	-0.211156	-0.0280255	0.0863951	-0.00788353	-0.00962589	-0.280612	-0.235545	-0.0911387	-0.132122	-0.0489683	-0.0459163
419239	-0.00812349	-0.0755568	-0.0709875	-0.109821	-0.120741	-0.132861	-0.15655	-0.0299624	-0.0491785	-0.0904005	-0.0606193	-0.100864	-0.0791475	0.0210909	0.00770343	-0.129074	-0.0990445	-0.184165	-0.0993715	-0.0715984	-0.0836389	-0.118872	-0.114953	0.00348762	-0.14917	-0.000167985	-0.0809637	-0.103487	-0.0761238	-0.0574569	-0.0170234	0.0483887	-0.0284984	-0.0164349	0.016276	-0.0115921	0.0403061	0.0170808	0.0161497	0.00474185	-0.00167609	-0.0357768	0.0280286	0.0104315	-0.0569655	-0.0295419	-0.0985082	-0.050368	0.00762523
421226	0.00914829	-0.0174396	-0.125861	0.0325542	0.0186432	0.0416182	-0.00362306	0.0243279	-0.00756707	-0.0706129	-0.107936	-0.0754513	-0.033642	-0.00893825	-0.0846827	-0.0221946	0.0317294	-0.0108188	0.0182831	-0.0102276	-0.0116844	0.0547463	-0.0428746	-0.0144616	-0.166715	-0.0678369	-0.124008	-0.0894576	-0.0645262	-0.0806289	-0.0348634	-0.0666497	0.0166111	0.00663027	-0.0263253	-0.087553	-0.0500367	-0.0947879	0.00173583	-0.0474773	0.00293351	0.0109162	-0.0482512	-0.0460052	-0.0544048	0.0294451	0.00257218	0.0269367	0.0194537
422632	-0.0954089	-0.0439837	-0.0379003	-0.0854571	-0.0996799	-0.133189	-0.0479335	-0.00952397	-0.0127489	-0.0255348	-0.00984199	-0.0202903	-0.11611	-0.102783	-0.158042	-0.0874596	-0.187546	-0.105148	-0.0131267	-0.0518789	-0.0790059	-0.0544585	-0.0582474	0.0037384	-0.0176569	-0.195252	-0.225383	-0.217031	-0.212263	-0.120766	-0.0742914	-0.196343	-0.0445186	-0.105321	-0.222308	-0.00676797	-0.0593068	-0.0820788	0.0123601	-0.0832603	0.0251891	-0.0451824	0.0257978	-0.26648	-0.299325	-0.374531	-0.262741	-0.086973	-0.0370853
424939	-0.148411	-0.00380877	-0.111713	-0.0946624	-0.0674058	-0.101764	-0.0263776	0.160922	0.181908	-0.236948	-0.144816	-0.172252	-0.0488522	-0.107085	-0.251596	-0.00244819	-0.0496453	-0.0782521	0.0307315	-0.114349	0.0168913	-0.091778	-0.0266781	-0.162968	-0.282153	-0.14767	-0.284132	-0.386297	-0.169313	-0.00940421	-0.0746135	-0.22698	0.0234122	0.100736	0.0607975	-0.0971089	-0.317726	-0.319542	0.0100515	-0.00642659	0.0361567	0.0624476	-0.0650784	-0.174295	-0.195257	-0.0305034	-0.018772	-0.0140873	0.0505683
429040	-0.277395	-0.167853	-0.411723	-0.306032	-0.330325	-0.278286	-0.237697	-0.0955269	-0.0220823	-0.50753	-0.352011	-0.427564	-0.387379	0.0345356	-0.292235	-0.369378	-0.421854	-0.224473	-0.297619	-0.280774	-0.0876672	-0.146298	-0.215987	-0.0598452	-0.396535	-0.33832	-0.374748	-0.465631	0.0442691	0.209567	0.216361	-0.237346	0.301782	0.0917745	-0.10727	-0.193444	-0.202141	-0.258918	-0.15803	-0.160046	-0.0439063	-0.0190747	-0.286242	-0.235936	-0.224059	-0.474041	-0.095072	-0.309249	-0.221498
432332	-0.264477	-0.0653592	-0.255463	-0.292564	-0.277136	-0.0456784	-0.227792	-0.0215723	0.00732987	-0.155479	-0.0887747	-0.185239	-0.25247	-0.182427	-0.0252562	-0.187286	-0.056294	-0.0866876	-0.174631	-0.0375322	-0.0618443	-0.131907	-0.0197386	-0.00271257	-0.148996	-0.230586	-0.181827	-0.217153	0.137487	0.109939	0.0849029	-0.0985142	0.219104	0.083368	0.0566716	-0.070497	-0.149691	-0.120778	0.0359699	-0.12226	0.0175536	-0.121519	-0.166011	-0.191604	-0.238664	-0.372291	-0.254714	-0.0280361	-0.232401
433839	-0.124125	-0.085229	-0.0923443	-0.142762	-0.145468	-0.11307	-0.118542	0.0275065	0.0155008	-0.0261625	-0.0140301	-0.0779711	-0.136027	-0.0385904	-0.0929952	-0.105988	-0.0778204	-0.154673	-0.102639	-0.112409	-0.124005	-0.135871	-0.0717596	0.00428318	-0.137949	-0.111053	-0.151409	-0.151496	-0.218132	-0.0882009	-0.0522649	-0.0679604	-0.033553	-0.0749847	-0.110478	-0.0355354	-0.0899722	-0.0196563	-0.0709534	-0.0532304	-0.0444266	-0.0588837	-0.0139734	-0.0235316	-0.197589	0.00367273	0.0120835	0.00581415	-0.0232203
436239	-0.17889	0.0159257	-0.26031	-0.179582	-0.174138	-0.0959555	-0.0245511	-0.026022	0.00271886	-0.367669	-0.164167	-0.153963	-0.139795	-0.117142	-0.3945	-0.234553	-0.244308	-0.106177	-0.0935473	-0.109817	-0.0883284	-0.113711	-0.0331015	-0.0962888	-0.255518	0.100347	-0.408998	-0.180037	-0.332104	-0.104398	-0.0164966	-0.215346	0.0178721	-0.164161	-0.250555	-0.197687	-0.168175	-0.210313	-0.177843	-0.0550361	-0.0881354	-0.121515	-0.255013	-0.430286	-0.388898	-0.309734	-0.238828	-0.120276	-0.188282
436845	-0.0244529	-0.0854339	-0.0777331	-0.0347221	-0.126687	-0.125065	-0.0651962	-0.105487	-0.101288	-0.122859	-0.204687	-0.165253	-0.0751707	0.0935841	0.0363641	-0.0738883	-0.136194	-0.22662	-0.0773317	-0.108818	-0.0917055	-0.183278	-0.108812	-0.0865834	-0.225347	-0.123747	-0.0486222	-0.319848	-0.0128951	0.00417864	0.0736443	0.0374732	0.0589967	0.0487457	0.071597	-0.0934352	-0.0704634	-0.079156	-0.102149	-0.10144	-0.0579707	-0.144322	-0.0941117	-0.180927	-0.0170831	-0.047349	-0.107845	-0.168653	-0.0672881
441939	0.0164721	0.0114157	-0.095081	0.00821851	-0.0168602	-0.0540595	0.0168459	0.0643191	0.0521191	-0.0878364	-0.338747	-0.207113	0.0454883	-0.191354	-0.321628	-0.000986708	-0.0938655	-0.0363146	-0.013569	-0.0303702	-0.0823545	-0.0633703	-0.0852554	-0.0279438	-0.31623	0.0352584	-0.305232	-0.180531	-0.230969	-0.038335	-0.20204	-0.359571	-0.14061	-0.141484	-0.232039	-0.347686	-0.312689	-0.461219	-0.0479493	-0.251602	0.0467734	0.0332376	0.093438	-0.0846553	-0.242456	-0.408194	-0.113213	0.0112178	0.0306988
445543	-0.105189	0.0596616	-0.158172	-0.136298	-0.164427	-0.145272	-0.0976877	-0.038369	0.00775257	-0.159502	-0.0738513	-0.174595	-0.089659	0.0589727	-0.0791338	-0.160088	-0.141732	-0.135811	-0.142927	-0.093305	-0.0727869	-0.123918	0.022078	-0.102409	-0.15127	0.00146127	-0.036875	-0.179754	-0.0384453	0.0757461	0.0220493	-0.108802	0.0706785	0.0216943	-0.0498993	-0.015787	-0.0960943	-0.0466707	-0.00925579	-0.0421338	-0.00789641	-0.0298749	-0.0533765	-0.064079	-0.0993545	-0.156833	-0.0238748	-0.101319	-0.102605
448347	-0.123725	-0.0818188	-0.196098	-0.185886	-0.203354	-0.190354	-0.194798	0.0749645	0.0589323	-0.0466284	-0.0197171	-0.022345	-0.144912	-0.131748	-0.170086	-0.155308	-0.0755783	-0.182463	-0.139397	-0.174571	-0.149839	-0.132213	-0.0865146	-0.11446	-0.137811	-0.0978921	-0.191477	-0.0772859	0.0450081	0.055391	-0.0087457	-0.103327	-0.0158595	-0.0073446	-0.0362881	-0.146472	-0.117374	-0.150948	-0.0670176	-0.0103215	-0.00269968	-0.0908807	-0.01572	-0.0583968	-0.104332	-0.205393	-0.0473217	-0.0931471	-0.0246782
449753	-0.0460597	-0.0308249	-0.0189944	-0.066664	-0.0817759	-0.0699428	0.0591925	-0.0288676	-0.0294198	-0.0796756	-0.011196	0.00322075	-0.0497743	0.0150349	0.034852	-0.075568	-0.0337626	0.00210486	-0.0633398	-0.0328191	-0.0611665	-0.0270059	-0.0175241	-0.01986	-0.0144943	-0.100771	0.0221069	-0.072726	0.00142113	-0.0344948	-0.00169127	0.0228274	-0.0491898	-0.0181101	-0.0235844	0.0098369	0.0407647	0.0572112	-0.0449565	-0.0711893	-0.0165404	-0.0971725	-0.00753014	0.0201787	-0.037963	-0.0519092	-0.0756346	-0.0573841	-0.0866568
453441	-0.0118246	-0.0583424	-0.194933	-0.0506862	-0.0426662	-0.0685236	-0.0365161	-0.0250327	-0.00407066	-0.0155739	-0.0196818	-0.0297697	-0.0317979	-0.0443129	-0.114315	-0.0624859	-0.01983	-0.0602089	-0.0539844	-0.0459166	-0.0575814	-0.0709692	-0.048877	0.0431952	-0.0673481	0.00235514	-0.0866635	-0.169068	-0.0975786	-0.118249	-0.167194	-0.0125778	-0.0297359	-0.0243062	-0.0289105	-0.100283	0.00336709	0.00180686	-0.0267095	-0.021567	0.00750193	-0.00341948	0.0131513	-0.0388901	-0.0256608	-0.0465769	-0.0277665	-0.0526769	0.00994654
454140	-0.0408046	-0.020739	-0.0723612	-0.0852598	-0.0977069	-0.0492136	-0.0282712	-0.0238756	-0.0275064	-0.100692	-0.0623474	-0.0984639	-0.0689171	0.0450032	0.0173232	-0.0661404	-0.0734258	-0.0788872	-0.0389996	-0.0530868	-0.0462332	-0.0605517	-0.0405825	-0.003044	-0.118925	-0.0849393	-0.0878232	-0.000358041	-0.0341861	0.0400895	0.0543995	-0.00943059	0.0773656	0.05594	0.029401	0.00913422	-0.0429485	-0.0693717	0.00983653	-0.0423122	-0.0132867	-0.0602138	-0.067029	-0.0798414	-0.122749	-0.0826974	-0.0794649	0.00104976	-0.0780867
456346	-0.199401	-0.0280674	-0.237349	-0.25264	-0.234745	-0.179837	-0.259624	0.0903931	0.13233	-0.160585	-0.162122	-0.135665	-0.167875	-0.147565	-0.403364	-0.246179	-0.161036	-0.103516	-0.0809573	-0.098075	-0.211679	-0.137791	-0.0492192	-0.0784763	-0.140303	-0.120209	-0.317163	-0.113849	-0.323519	-0.0423307	-0.169673	-0.327951	0.118193	0.0444452	-0.248793	-0.123864	-0.127582	-0.205671	-0.064111	-0.016662	0.101845	-0.286307	-0.0688106	-0.296909	-0.279368	-0.262032	-0.205285	-0.0633476	-0.377837
459453	-0.2845	-0.0958782	-0.217618	-0.263318	-0.385459	-0.371759	-0.379714	0.140726	0.179316	-0.352911	-0.404504	-0.301481	-0.244583	0.00662796	-0.162326	-0.378172	-0.421289	-0.310304	-0.298646	-0.364607	-0.325931	-0.260962	-0.0929947	-0.102366	-0.434983	-0.222347	-0.0549151	-0.303795	-0.297858	0.206785	0.187754	-0.0835536	0.301916	0.0829888	0.159119	0.129535	-0.298072	-0.326994	0.16168	0.0772786	0.0832461	-0.377177	-0.194509	-0.303128	-0.380999	-0.414215	-0.263386	-0.350838	-0.300163
461743	-0.0020535	0.0449009	-0.0306014	0.0372031	-0.0301124	0.0164539	-0.0526378	0.114816	0.107498	-0.122103	-0.118878	-0.192795	-0.0213248	-0.0577454	-0.194214	-0.0342247	0.0110387	-0.0710153	-0.034798	-0.0165142	-0.0288814	-0.00893132	0.0275844	-0.119854	-0.246374	-0.17777	-0.28931	-0.275869	-0.26635	0.118588	0.0402452	-0.237556	0.110087	-0.0808174	-0.0259872	0.0267394	-0.107095	-0.197061	0.0459068	0.0199879	0.0818139	-0.0735336	-0.0793826	-0.239228	-0.102685	-0.185262	-0.219458	0.0138452	-0.0581131
463040	-0.0970475	-0.0443215	-0.0860958	-0.189818	-0.165279	-0.0951277	0.0151645	-0.0673562	-0.032217	-0.0953358	-0.0798021	-0.0726501	-0.134126	-0.166338	-0.173098	-0.0780885	-0.0889032	-0.144528	-0.109767	-0.068151	-0.0795481	-0.170514	0.000529407	0.0573302	-0.0657674	0.00797954	-0.206307	-0.221485	-0.17198	-0.0222839	-0.169996	-0.0557873	-0.0438914	-0.146466	-0.147467	-0.133757	-0.0820762	-0.143114	0.00281406	-0.0442767	-0.0290526	-0.0140111	-0.048528	-0.175214	-0.100809	-0.085488	-0.102624	-0.0726392	-0.0838903
465852	0.0656877	0.00172981	-0.0230876	0.019465	0.0435708	0.0425939	0.00767006	-0.0606786	-0.0464963	0.0200162	0.0196732	-0.0282521	0.0636923	0.018546	-0.0701693	0.00556508	-0.0259976	-0.0555486	0.0106947	0.0530789	0.0124878	0.00900442	-0.0410236	-0.0290784	-0.073773	-0.0639905	-0.0817907	-0.0123116	-0.120936	-0.0985007	-0.0514592	0.0643155	-0.0941385	-0.0280891	-0.0727083	-0.0484948	0.0699232	0.0710176	0.00116309	-0.0121479	-0.00611367	0.00948544	0.000334693	0.0386829	0.0465737	0.0155559	-0.0102577	0.0136619	0.01865
467351	-0.147611	0.0190191	-0.18336	-0.177067	-0.157737	-0.0728394	-0.143832	0.0616264	0.0381767	-0.156405	-0.0435912	-0.12567	-0.102677	-0.0798734	-0.0535668	-0.0533962	-0.134524	-0.136133	-0.0273386	-0.0394986	-0.0498189	-0.0809876	0.0238346	-0.101309	-0.148768	0.00994725	0.0123057	0.0153937	0.0103563	0.102983	0.0236465	-0.0462072	0.0883232	0.0320891	0.0840152	0.0615144	-0.0835352	-0.15017	-0.0432087	0.0378755	-0.0195475	-0.0672635	-0.0630266	-0.122866	-0.111806	-0.12334	-0.092241	-0.0299255	-0.09439
468050	-0.109814	-0.00651751	-0.131111	-0.13527	-0.12203	-0.0548421	-0.061301	-0.00050008	0.0121724	-0.0930061	-0.0689242	-0.126816	-0.123316	-0.129468	-0.0557842	-0.0998018	-0.0166592	-0.0206148	-0.018899	-0.0486181	-0.0623967	-0.0528561	-0.00190944	-0.0227974	-0.148484	0.026965	-0.0260291	-0.072584	0.0289069	0.0524812	-0.0660406	-0.0378906	0.0731885	0.0274283	0.0351253	-0.0790704	-0.140951	-0.143933	-0.0316139	-0.0529243	-0.00672068	-0.0424987	-0.0686158	-0.0930914	-0.0971455	-0.103776	0.00693604	-0.0133898	-0.0883779
469961	-0.19997	-0.114253	-0.310934	-0.0791958	-0.208674	-0.214216	-0.173534	0.0333051	0.052419	-0.545486	-0.215986	-0.413876	-0.246323	-0.0536735	-0.0492564	-0.26853	-0.084453	-0.11965	-0.206987	-0.16777	-0.139099	-0.173655	-0.0524617	-0.0418353	-0.582296	-0.0307554	-0.252604	-0.160636	0.00610007	0.114136	0.202892	-0.292929	0.203297	0.0458945	-0.0162712	-0.010909	-0.349686	-0.38766	0.0496254	-0.00800001	0.0477988	-0.322638	-0.357162	-0.348158	-0.400518	-0.234202	-0.169056	-0.269617	-0.377626
475855	-0.179285	-0.0354041	-0.309933	-0.101019	-0.188331	-0.203194	-0.183405	0.134812	0.192894	-0.356381	-0.112392	-0.501002	-0.146655	-0.204998	-0.348524	-0.194515	-0.0307805	-0.073288	-0.260379	-0.195512	-0.187863	-0.105621	-0.0518503	-0.117982	-0.351234	-0.291875	-0.193711	-0.0704811	-0.0788894	-0.0766545	0.00415339	-0.333858	0.126794	-0.0669075	-0.120888	-0.147656	-0.278813	-0.432442	0.00100014	-0.12601	-0.14258	-0.0312862	-0.173685	-0.359173	-0.244276	-0.267279	-0.019749	0.0114455	0.0382605
479762	-0.0895983	-0.0469472	-0.168626	-0.121316	-0.106742	-0.0599225	-0.0593608	0.0157215	-0.01478	-0.186221	-0.140822	-0.261095	-0.155939	-0.0324549	-0.129787	-0.165987	-0.0860146	-0.0932319	-0.126974	0.0155295	-0.00892103	-0.0889343	0.00301228	-0.025323	-0.168618	-0.182405	-0.228242	-0.0924254	-0.0269309	0.103162	0.048007	-0.110825	0.152658	0.05127	-0.0106146	-0.137765	-0.123678	-0.196858	-0.0574024	-0.1669	-0.028351	-0.0642394	-0.2055	-0.206655	-0.152802	-0.11374	-0.0796662	-0.10487	-0.0362605
480141	-0.113099	0.0658843	-0.0463242	-0.148707	-0.0196728	-0.000168732	-0.018547	-0.119365	-0.0510814	-0.0593993	-0.0614008	-0.131064	0.0190644	0.00134962	0.0363649	0.134949	0.116756	-0.0907413	0.119477	0.0920429	0.0845672	0.00847357	0.063253	-0.0911583	-0.125315	-0.114792	0.153994	-0.136324	0.143755	-0.00542048	-0.100266	-0.00387589	-0.0516293	-0.0203464	0.0283211	-0.0152298	0.0638628	0.0495659	0.130188	-0.0717359	0.0363049	0.135471	0.0685737	0.0347886	0.143809	0.155044	0.163178	0.0979421	0.126872
481042	-0.477108	-0.230996	-0.37668	-0.423891	-0.480328	-0.42341	-0.415601	0.187545	0.113819	-0.503924	-0.22666	-0.318925	-0.315061	-0.0074497	0.106443	-0.391073	-0.316877	-0.237274	-0.379821	-0.381293	-0.343994	-0.327917	-0.311545	0.0483267	-0.462686	-0.276216	-0.0393349	-0.216672	0.190789	0.327093	0.0207819	-0.116524	0.362913	0.271533	0.177085	-0.163695	-0.411469	-0.422481	0.186375	0.044927	-0.00103696	-0.252348	-0.210111	-0.488865	-0.339489	-0.390976	-0.42705	-0.395963	-0.309196
481951	-0.0498713	-0.00345701	-0.249556	-0.0399967	-0.0191425	-0.00985732	0.0174274	0.0478109	0.0828434	-0.152815	-0.0378037	-0.0925667	-0.0266418	-0.035411	-0.179787	-0.0512151	-0.0910718	0.00438084	-0.03376	-0.0220671	0.00214863	-0.0693433	-0.0332712	-0.0126426	-0.17929	-0.0310244	-0.0789294	-0.0879182	-0.133041	0.0301854	-0.0227721	-0.191874	0.0135071	-0.0120758	-0.0613559	-0.0258891	-0.11067	-0.191624	-0.0961996	0.0680503	0.0372514	-0.116991	-0.01726	-0.267616	-0.130906	-0.130911	-0.278556	-0.0300274	-0.0306806
485757	-0.0777096	-0.059736	-0.125748	-0.0952355	-0.0892794	-0.0572406	-0.0796539	-0.0423411	-0.0447133	-0.105858	-0.0802497	-0.0940612	-0.0890969	-0.0528008	-0.0771704	-0.0495513	0.0134998	-0.0453062	-0.0224704	-0.0152116	-0.0566032	-0.0555197	-0.0696924	-0.0261756	-0.121135	-0.0130002	-0.0579962	-0.14525	-0.00704528	0.0242901	-0.0746953	-0.0111123	0.0213407	-0.0141401	-0.0243568	-0.0638334	-0.109668	-0.105913	-0.101709	-0.125252	-0.0365565	-0.0365761	-0.0680427	-0.0631619	-0.080689	-0.0932794	-0.00386506	-0.0519869	-0.0772128
486759	0.0615868	-0.0394234	-0.100827	0.0273284	0.0220026	0.0879633	0.0650007	-0.0679091	-0.0929559	-0.0211122	-0.0550805	-0.085389	-0.0316897	0.00889101	-0.127503	-0.0468411	-0.0530544	-0.0165114	-0.0402255	-0.0277468	0.0135207	0.0708433	-0.0406902	0.041482	-0.101886	-0.127647	-0.1377	-0.077624	-0.0874841	-0.0727018	-0.0383393	-0.0491074	-0.0934541	-0.0660801	-0.0546714	-0.133434	-0.159263	-0.112962	-0.107114	-0.0862576	-0.0356401	-0.129005	0.0278421	-0.0661282	-0.192781	-0.0890976	-0.147211	-0.0692311	-0.127102
495255	-0.0779911	-0.100695	-0.17167	-0.169253	-0.137145	-0.082648	-0.0418222	0.0412657	-0.0135038	-0.059648	-0.0323897	-0.146633	-0.106151	-0.0816463	-0.1006	-0.103205	-0.0556516	-0.128788	-0.133836	-0.0888727	-0.107366	-0.0551552	-0.0914517	0.0701406	-0.0877232	-0.0976218	-0.118403	-0.139909	-0.0795403	-0.000460442	-0.0640697	-0.0227111	0.0282281	-0.0169949	-0.0313998	-0.0633401	-0.0609169	-0.104971	-0.0400166	0.0170088	-0.0305738	-0.0536444	0.0417448	-0.164117	-0.121836	-0.0798176	-0.0282507	-0.0909518	-0.0650731
497865	-0.0271752	-0.0403932	-0.0664148	-0.0341329	-0.0623292	-0.063572	0.000321016	0.0469473	0.0118785	-0.0662573	-0.0139096	0.0139317	-0.0212712	-0.151863	-0.232519	-0.00298291	-0.0407682	-0.0316959	0.00773172	-0.0233057	-0.078578	-0.149795	-0.0492832	-0.0249647	-0.113595	-0.0433536	-0.168313	-0.0249662	-0.0800556	-0.116165	-0.0352618	-0.201522	-0.109152	-0.0418542	-0.0289439	0.0115472	-0.000430295	-0.116456	0.01849	-0.00362808	0.0105834	0.027885	-0.0159432	-0.0824444	-0.0501092	-0.069522	-0.111993	0.019779	-0.0160792
499566	-0.0423519	-0.057584	-0.0434163	-0.0298817	-0.00549606	-0.0337925	0.0290179	-0.0509399	-0.0698757	-0.0521	-0.063995	-0.147787	-0.0392945	-0.0632295	-0.0834678	-0.0566376	-0.0837778	-0.0884567	-0.0256528	-0.0494519	-0.0345825	-0.0665407	-0.0258356	-0.0512337	-0.0764244	-0.122172	-0.112979	-0.145532	-0.0598305	-0.0699797	-0.14105	-0.035597	-0.0905309	-0.0496993	-0.0737169	-0.0493182	0.0781665	0.0831361	-0.0422784	-0.0331005	0.0134619	-0.0783186	0.0202059	-0.113737	-0.013219	0.0353699	-0.102994	-0.0286891	-0.0917105
500222	-0.0385291	-0.0158313	-0.192809	-0.081869	-0.0904349	-0.0691455	-0.113828	0.11469	0.162388	-0.1103	-0.149114	-0.200636	-0.0656288	-0.0978087	-0.241563	-0.0719409	-0.103523	-0.176808	-0.0593212	-0.070941	-0.0777311	-0.205959	-0.00705094	0.0472128	0.0584058	-0.0180591	-0.185855	-0.024642	-0.118842	0.0355923	-0.100359	-0.0577826	0.0564061	-0.049246	-0.11947	-0.0710179	-0.10028	-0.217187	-0.0453399	0.0518534	0.0680106	-0.118444	-0.0479542	-0.236012	-0.208551	-0.221496	-0.252052	-0.223879	-0.181009
506234	-0.154016	-0.00769254	-0.198517	-0.109655	-0.0499156	-0.0213471	0.0307332	0.076305	0.0877727	-0.217216	-0.155108	-0.245703	-0.0781322	-0.144624	-0.18105	-0.0671796	-0.0600902	-0.111204	0.00110069	0.0159229	-0.0512854	-0.0808324	0.0437002	0.00946205	-0.070793	0.0149389	-0.334758	0.0296079	-0.066403	0.0678409	-0.00901707	-0.136266	0.1398	-0.0571753	-0.104624	-0.120079	-0.313035	-0.300463	0.102233	-0.225646	-0.0442487	0.0952048	-0.0318272	-0.336668	-0.324255	-0.103717	-0.0495407	-0.0709016	-0.0985826
510225	-0.0406149	0.0658769	-0.192665	-0.0483056	-0.0541867	-0.0100783	0.143582	0.135649	0.144258	-0.0454809	-0.143017	-0.3023	-0.0322156	-0.337881	-0.474652	0.0118519	-0.0654796	-0.0170251	0.0468018	-0.016615	-0.0210034	-0.0528344	0.0516319	-0.0485904	0.0159544	-0.178971	-0.390931	-0.0126883	-0.0835087	-0.103467	-0.259392	-0.319713	-0.165356	-0.169437	-0.187095	-0.0775536	-0.316834	-0.488112	0.0344921	-0.00571527	0.063746	-0.0641344	-0.0638377	-0.447867	-0.363316	-0.536008	-0.0175428	-0.00823017	-0.249003
510326	0.0328223	-0.0497492	-0.081356	-0.0268484	-0.0488631	-0.102922	-0.0889094	-0.0404444	-0.065966	-0.0530296	-0.033141	-0.0716155	-0.036475	-0.0123252	-0.0356386	-0.0717311	-0.0594117	-0.0936745	-0.084303	-0.0705062	-0.0895587	-0.12316	-0.0627811	0.0286762	0.00230184	-0.0693091	-0.0422606	-0.0543599	-0.033775	0.00221618	0.0370603	-0.0142564	0.0468815	-0.0298719	-0.0392685	-0.025235	-0.0344272	-0.025298	-0.0429844	-0.0257224	-0.0373665	-0.0754972	-0.0161014	-0.11458	-0.0838886	-0.0748753	-0.121238	-0.0729431	-0.0784628
512835	-0.0467023	-0.0392908	-0.132375	-0.0999694	-0.0799932	-0.029975	-0.0400497	-0.0468871	-0.0584779	-0.0344916	-0.0959043	-0.100797	-0.0916369	-0.0737577	-0.0761978	-0.0375265	-0.00999988	0.0163629	-0.021029	-0.0665716	-0.0354813	0.0163091	-0.0510855	-0.0597649	-0.129825	-0.07354	-0.015891	-0.102689	-0.105886	-0.0891268	-0.062009	-0.059367	-0.0198573	-0.0298581	-0.0202698	-0.0271116	0.00429343	0.0100535	-0.0120325	-0.0138359	0.0276767	-0.0177034	0.0148887	-0.145671	-0.0824147	-0.0839896	0.0221614	-0.0669208	-0.0314051
513130	-0.132644	0.0452649	-0.122353	-0.141218	-0.110258	-0.0759463	0.00954817	0.0707342	0.0820257	-0.164502	-0.198779	-0.190011	-0.0543491	-0.0326206	-0.0483372	-0.126488	-0.134466	-0.204757	-0.0810372	-0.10232	-0.0582307	-0.00604365	0.044578	0.00834407	-0.11603	-0.173103	-0.108068	-0.120816	-0.119808	0.0713546	-0.00997264	-0.0326387	0.105588	0.0384032	-0.0103977	-0.0366021	-0.0923032	-0.0818105	0.0268409	0.0239994	0.0106867	-0.0875368	0.00920776	-0.230389	-0.259402	-0.23532	-0.181373	-0.0846859	-0.257195
513736	0.00692157	0.0443164	-0.0146489	-0.0264314	-0.0379016	-0.0508183	-0.0548183	0.0748851	0.0503461	-0.053017	-0.128126	-0.126974	-0.0143373	-0.134891	-0.219013	-0.0187023	-0.0780289	-0.0361129	0.0135752	-0.0245919	0.00778259	-0.0249314	0.038667	-0.105262	-0.0851104	-0.134575	-0.127633	-0.12621	-0.0496942	-0.0916665	-0.0141201	-0.191291	-0.00720637	-0.106207	-0.14676	-0.0535143	-0.101475	-0.188386	0.028488	-0.0124059	0.053807	0.0946023	0.0588177	-0.147935	-0.0597365	-0.0188172	0.0978589	0.0438338	0.0218681
516742	0.00233964	-0.0930653	-0.118138	-0.0798432	-0.0338016	-0.0190118	-0.00216709	-0.0217773	-0.0117693	-0.0929361	0.036288	-0.128548	-0.0464179	-0.191493	-0.245721	-0.0375285	-0.215358	-0.0290792	-0.0809337	-0.00669274	-0.0587263	-0.0638035	-0.102469	-0.0814071	-0.2234	0.0494055	-0.121456	-0.190784	-0.208561	-0.0609436	-0.0763547	-0.279934	0.0111613	-0.109061	-0.18861	-0.166421	-0.187359	-0.212159	-0.0490475	-0.0336743	0.0117668	-0.0427859	-0.0370343	-0.207795	-0.17394	-0.271749	-0.0144839	-0.082281	-0.108041
517239	-0.172765	-0.114868	-0.0332893	-0.145599	-0.180574	-0.124118	-0.0363487	0.0277308	0.0737849	-0.228348	-0.0215785	-0.124427	-0.117379	-0.026791	-0.0429251	-0.0831868	-0.0802746	-0.0924941	-0.126073	-0.131704	-0.105459	-0.160888	-0.0282052	-0.00975949	-0.180262	-0.180714	-0.12759	-0.0416291	-0.100521	0.00331146	0.0647979	-0.177295	0.0547512	0.00520974	-0.0257534	-0.141126	-0.218031	-0.221457	-0.0577631	-0.0819737	-0.0139667	-0.0771516	-0.0880318	-0.138427	-0.174078	-0.181199	-0.0556671	-0.139397	-0.0895765
518746	-0.100679	-0.0225801	-0.13676	-0.0921662	-0.0893096	-0.0070771	-0.0495627	0.0375677	0.0332897	-0.262467	-0.185312	-0.297159	-0.0938535	-0.128583	-0.295626	-0.0761496	-0.0562239	-0.0160627	-0.0166696	-0.0370912	0.00813109	0.000521106	0.0282246	0.000367368	-0.177861	-0.0825249	-0.184984	-0.165761	-0.12946	0.0747971	-0.106127	-0.225823	0.00873993	0.0568964	-0.0263908	-0.232064	-0.215011	-0.299298	0.0601483	-0.0976317	-0.000593278	-0.0944391	-0.0842561	-0.259617	-0.287112	-0.150731	-0.0395013	-0.0587311	-0.159386
519647	-0.0566825	-0.00565467	-0.0557787	-0.114752	-0.0694715	-0.0658917	-0.10781	0.0747566	0.130325	-0.278432	-0.0945506	-0.213976	-0.0424999	-0.125673	-0.142816	-0.0813948	-0.078875	-0.0945876	-0.0915837	-0.0418955	-0.0720512	-0.112754	-0.0825414	-0.0266399	-0.29879	-0.159082	-0.28826	-0.196869	-0.141917	-0.0264449	-0.0114089	-0.192272	0.0894929	-0.0461479	-0.167416	-0.0209289	-0.11568	-0.176032	-0.0116175	0.0217675	0.00660618	-0.056273	-0.0846406	-0.217629	-0.232951	-0.123118	-0.014633	-0.107457	-0.0691959
519950	0.0589305	-0.116642	-0.0917826	-0.0219791	0.0100205	-0.000960776	-0.0660987	-0.075139	-0.0898453	-0.164137	-0.121246	-0.103961	-0.0499531	0.100412	0.0990118	-0.0522596	-0.118779	-0.107173	0.0547151	0.00746801	0.0776433	0.0369093	-0.0567569	-0.12786	-0.166886	-0.146725	-0.10913	-0.255271	0.0184551	0.0657924	-0.139806	0.126613	0.156997	0.111812	0.0470711	-0.00861462	0.161351	0.224553	-0.00374252	0.0736805	-0.00137638	-0.230053	-0.113137	-0.185046	-0.00180789	-0.0640981	-0.201387	-0.240827	-0.15641
520228	-0.0524706	-0.0770734	-0.220799	-0.088484	-0.0764816	-0.137442	-0.0775648	-0.00199781	-0.00232855	-0.218689	-0.0863875	-0.410036	-0.0975793	-0.0138846	-0.207758	-0.232558	-0.331135	-0.174815	-0.140102	-0.127406	-0.119083	-0.117021	-0.157843	-0.163897	-0.232933	-0.0910823	-0.149962	-0.0602463	-0.300163	0.0903393	-0.0463322	0.0822626	0.162443	0.11289	0.0199732	-0.155208	-0.262018	-0.304596	0.0216021	-0.0906623	-0.0694802	-0.12231	-0.112172	-0.39254	-0.256974	-0.374558	-0.248523	-0.0748816	-0.0836961
522434	-0.0561125	-0.0118559	-0.0897831	-0.060497	-0.109748	-0.0860135	0.114003	0.0998109	0.130617	-0.0930275	-0.0905742	-0.223376	-0.0673898	-0.0398114	-0.0838135	-0.102456	-0.188745	-0.178539	-0.043219	-0.0581422	-0.071962	-0.0960392	0.0693669	0.0663857	-0.113933	-0.184907	-0.145314	-0.320827	-0.0114739	0.0457129	0.0906617	-0.150266	0.0437509	-0.0950796	-0.0148372	-0.11847	-0.156044	-0.189237	-0.0640145	0.0449702	0.0103535	-0.0112283	0.0267877	-0.140854	-0.157457	-0.13658	-0.034352	-0.0103551	-0.0454603
523032	-0.0436484	-0.0319034	-0.172386	-0.0626346	-0.0625974	-0.0400918	-0.0629981	-0.0125442	-0.0137809	-0.0738087	0.00148706	-0.0984037	-0.0395886	-0.128823	-0.202003	-0.0732434	-0.00534553	0.0283443	-0.0405156	-0.0425958	-0.03492	-0.0536059	-0.00138576	-0.0329185	-0.198574	0.055289	-0.0810907	-0.0917797	-0.104796	-0.015783	-0.00607558	-0.191481	-0.0505851	0.0061159	0.00527688	-0.21634	-0.205199	-0.171835	-0.024085	-0.130059	0.0457078	-0.123127	-0.0412455	-0.168296	-0.262657	-0.11434	-0.145617	-0.0920721	-0.239057
524135	-0.187155	-0.12297	-0.155679	-0.241218	-0.303775	-0.256929	-0.189625	0.0315463	0.031561	-0.168375	-0.165882	-0.120672	-0.198701	0.00932673	-0.0930591	-0.261495	-0.232599	-0.221365	-0.221663	-0.240414	-0.237383	-0.271173	-0.174792	-0.0125506	-0.176306	-0.116035	-0.05789	-0.218918	-0.0180179	0.0550206	0.123822	-0.0398951	0.123909	0.0961932	0.016151	-0.117477	-0.113391	-0.154728	0.0107912	-0.0346379	0.00328673	-0.11195	-0.0574478	-0.160379	-0.224867	-0.272939	-0.066208	-0.190671	-0.178795
525541	-0.127381	-0.0513693	-0.149233	-0.121192	-0.0875719	-0.113215	0.0211068	-0.00153918	-0.0115983	-0.26849	-0.187424	-0.131584	-0.0760045	0.0031458	-0.0573321	-0.115147	-0.135687	-0.116205	-0.162637	-0.174848	-0.0990937	-0.155804	-0.159058	-0.0982818	-0.171945	-0.0349825	-0.257944	-0.220479	-0.0727014	0.0357484	0.0392591	-0.0665784	0.0709755	-0.0599081	-0.0143364	-0.0830643	-0.133855	-0.137697	-0.0435396	-0.152328	-0.0242205	-0.13945	-0.0687117	-0.13536	-0.134559	-0.127458	-0.125331	-0.197906	-0.10888
529549	-0.154868	-0.0671733	-0.102466	-0.1451	-0.163304	-0.0915874	0.0185288	0.081898	0.107315	-0.0493797	-0.0856905	-0.0983286	-0.114655	-0.0921805	-0.117192	-0.0870402	-0.0305186	-0.0903713	-0.0954081	-0.0897874	-0.101651	-0.069984	-0.0386901	0.00101936	-0.096545	0.0048738	-0.12252	-0.0305913	-0.1114	-0.0333923	-0.103186	-0.0459065	-0.0368537	0.0515855	0.0134971	0.0442102	-0.0326521	-0.0322349	0.0577821	0.0364124	0.0166562	-0.0345332	0.00162274	-0.0626659	-0.086669	-0.116671	0.0061443	-0.0577861	-0.0502567
529953	-0.0388322	-0.0890231	-0.117739	-0.0252346	-0.0628732	-0.0905109	0.0024854	-0.0486339	-0.0377132	-0.137383	-0.0893517	-0.0754057	-0.0919674	-0.0689805	-0.12676	-0.102967	-0.146655	-0.0749369	-0.106592	-0.0763068	-0.118918	-0.0199704	-0.0966841	-0.00354053	-0.0814145	-0.0805411	-0.167851	-0.0254871	-0.153058	0.00247295	-0.111944	-0.0727602	0.047461	-0.0406579	-0.0551798	-0.10564	-0.128969	-0.201388	-0.144968	-0.0462429	-0.0311263	-0.056266	-0.0930494	-0.106627	-0.0774105	-0.0697963	-0.181277	-0.0850391	-0.196527
530635	0.00213588	-0.0721174	-0.21663	-0.0530039	-0.103839	-0.157987	-0.099203	0.0406768	0.0463098	-0.0562855	-0.12522	-0.192084	-0.105375	-0.136937	-0.279985	-0.0727364	-0.123831	-0.0762489	-0.1139	-0.127379	-0.149906	-0.160187	-0.118877	-0.204763	-0.0342525	-0.0859512	-0.216656	-0.0458196	0.00405292	0.0885309	0.113618	-0.246795	0.0937641	-0.0458131	-0.183988	-0.0387423	-0.0827918	-0.2687	0.0545092	-0.000591739	0.011863	-0.0250117	-0.127996	-0.2426	-0.0536416	-0.259443	-0.0593777	-0.094374	-0.0211059
531536	-0.053252	-0.0497971	-0.205179	-0.0459036	-0.0778661	0.0723286	-0.0193661	0.111134	0.142117	-0.241721	-0.270844	-0.199979	-0.0802801	-0.170107	-0.279014	-0.0895654	0.000791	-0.0916438	0.0433084	-0.0499713	0.144812	0.119032	-0.0102887	0.0321145	-0.188084	0.0619439	-0.43424	-0.0338659	-0.1692	0.0564528	-0.213967	-0.271656	0.11686	0.058036	-0.309704	-0.0280104	-0.297604	-0.554731	-0.0454016	-0.27228	-0.0512302	-0.107595	-0.148255	-0.355093	-0.399068	-0.411177	0.0804491	-0.177706	-0.201564
531940	-0.0480139	-0.130085	-0.103244	-0.103413	-0.108926	-0.11717	-0.0602083	0.0146702	0.00964179	-0.123487	-0.038139	-0.108594	-0.118083	-0.172625	-0.240205	-0.128801	-0.082102	-0.0433232	-0.0834716	-0.133634	-0.127975	-0.114249	-0.151476	0.00795543	-0.318868	-0.0392209	-0.237179	-0.237058	-0.208141	-0.135496	-0.064763	-0.211761	-0.109654	-0.00843149	-0.0209552	-0.118017	-0.233636	-0.274946	-0.0668026	-0.0282691	0.0135223	-0.0748327	-0.0870691	-0.130401	-0.180267	-0.158352	-0.0742218	-0.0666434	-0.0777342
536647	-0.142187	0.00423055	-0.105867	-0.12168	-0.174773	-0.16482	-0.117244	0.203683	0.147749	-0.0951744	0.0767934	0.0932355	-0.124413	-0.10426	-0.237735	-0.193813	-0.17289	-0.0833322	-0.160335	-0.126008	-0.0737145	-0.107058	0.0332287	-0.089013	-0.163953	0.0456333	-0.147934	0.106825	-0.0976328	0.0707098	-0.0272529	-0.147189	0.0540247	0.00717665	-0.0154252	-0.0430391	-0.310721	-0.271483	-0.000981895	-0.0633634	-0.161966	-0.0223747	0.0754446	-0.0437366	-0.170399	-0.143768	-0.0843282	-0.145132	-0.0363582
540436	-0.0827431	0.00306426	-0.146555	-0.153249	-0.131442	-0.0366911	-0.0688146	-0.0480255	-0.0578378	-0.155612	-0.116597	-0.101704	-0.0633917	-0.0106798	-0.0801252	-0.0716535	-0.0969662	-0.0565165	-0.00835984	-0.0558058	-0.0589256	-0.0421406	-0.00975366	-0.0165198	-0.198632	0.0417545	-0.171077	-0.192379	-0.105066	-0.00966603	-0.0393558	-0.0477595	-0.00636997	-0.0222378	-0.0159269	-0.106274	-0.0817151	-0.1095	-0.0440001	-0.0662609	-0.0602685	-0.0577391	-0.115437	-0.150066	-0.181556	-0.111742	-0.0873299	-0.0338248	-0.0564815
541640	-0.0953664	-0.0985209	-0.139858	-0.143795	-0.152749	-0.129411	-0.131422	-0.0599623	-0.0545392	-0.0471226	-0.127704	-0.118667	-0.0974187	-0.144763	-0.20282	-0.107679	-0.0585987	-0.0921643	-0.110464	-0.129374	-0.110555	-0.10659	-0.0778178	-0.0356239	-0.0746474	0.106977	-0.184716	0.0762022	-0.0552734	-0.127249	-0.140492	-0.102202	-0.125598	-0.144837	-0.10644	-0.0912818	-0.0501436	-0.0810198	-0.0348118	-0.00717332	-0.0160482	-0.0179573	-0.0193256	-0.0570231	-0.0758248	-0.048335	-0.107272	-0.0850217	-0.0689553
541943	-0.0791425	0.0212526	-0.17357	-0.168946	-0.175944	-0.0739252	-0.12038	-0.00994398	-0.0339906	-0.286152	-0.105838	-0.219066	-0.0902438	-0.169339	-0.21515	-0.0984287	-0.00106703	-0.0835172	0.0223911	-0.072736	-0.101503	-0.10727	-0.0231776	-0.116342	-0.136232	-0.0643063	-0.167871	-0.121846	-0.178629	-0.0527706	-0.106461	-0.15857	-0.0128614	-0.0277678	-0.140993	-0.124337	-0.137032	-0.152255	-0.0969319	-0.131268	-0.0470877	-0.0654558	-0.157226	-0.177215	-0.118093	-0.035924	-0.157721	-0.128557	-0.0321578
545345	-0.071377	-0.0412421	-0.113808	-0.125202	-0.123196	-0.0682242	-0.0499596	-0.0295522	-0.0445172	-0.137458	-0.162309	-0.233901	-0.0963347	-0.0531994	-0.193707	-0.125819	-0.00654327	-0.0238687	-0.0637889	-0.0575854	-0.0696845	-0.0397884	-0.0360504	-0.0557183	-0.162208	-0.014749	-0.203035	-0.139683	-0.21482	0.0145566	-0.105832	-0.0840978	0.0306052	0.0713075	-0.00228312	-0.245108	-0.158149	-0.244627	-0.039863	-0.0594467	-0.0609157	-0.093541	-0.111914	-0.100101	-0.208332	-0.136276	-0.189642	-0.056868	-0.229707
547046	0.0678442	-0.054174	-0.0921376	0.0743703	0.00465602	-0.00605178	0.0759129	-0.025799	-0.0152388	-0.177986	-0.0904641	-0.181438	-0.0467718	-0.0842531	-0.0862834	-0.0223821	-0.0754798	-0.0752206	-0.0556908	0.0402473	-0.0199892	-0.0728873	0.0259197	-0.0322909	-0.138412	0.0311821	-0.152238	-0.0802597	-0.0686009	-0.0136198	-0.0178461	-0.197957	0.0636179	0.00888567	-0.0823741	-0.151206	-0.114789	-0.205579	-0.0412755	-0.119023	-0.0091536	0.00586488	-0.0517193	-0.21863	-0.173282	-0.25826	-0.0366835	-0.0103033	-0.124136
548250	-0.0369194	0.0712205	-0.247865	-0.0143955	-0.0167446	0.00615881	0.12143	0.118882	0.106962	-0.188039	-0.223025	-0.179725	-0.0556039	-0.215018	-0.258699	0.0332225	-0.273227	-0.071371	-0.0460903	0.0257753	0.0876837	0.0654258	0.0711946	-0.0627601	-0.252975	-0.167854	-0.36802	-0.22653	-0.337111	-0.24707	-0.160639	-0.326304	-0.00805393	-0.219177	-0.24818	-0.171011	-0.341192	-0.410161	0.0739259	-0.0494144	-0.0360947	0.0537747	-0.151152	-0.251275	-0.121442	-0.124469	-0.0278752	-0.187338	0.0408139
552241	-0.163813	-0.0800532	-0.0899322	-0.126622	-0.147061	-0.119996	-0.14708	0.0365608	0.0156624	-0.0973525	-0.120417	-0.0637705	-0.102738	-0.107064	-0.18058	-0.135513	-0.0550047	-0.0490822	-0.120191	-0.094493	-0.0755942	-0.118794	0.00770164	-0.0599143	-0.0730678	-0.0201132	-0.0221327	0.0533248	-0.0604687	0.114179	-0.112963	-0.0772943	0.043817	0.00868114	0.00134855	-0.0326856	-0.104266	-0.18249	0.00176372	0.00554466	0.0319425	0.0553688	-0.0732317	-0.0823897	-0.0795763	-0.110064	0.00833998	-0.118933	0.0302352
552544	-0.0560442	-0.0716092	-0.10926	-0.139958	-0.155301	-0.155055	-0.194717	0.0264413	0.0509258	0.0296757	-0.19006	-0.239346	-0.0148923	-0.241484	-0.303626	-0.154958	-0.183272	-0.201428	-0.211344	-0.138999	-0.14922	-0.213159	-0.0213674	-0.114578	-0.203576	0.0456513	-0.245533	-0.160391	-0.269351	-0.174977	-0.0780563	-0.262522	-0.0276649	-0.131575	-0.22825	-0.117035	-0.206504	-0.285879	-0.0638821	-0.187713	-0.0566177	-0.0917824	-0.0875756	-0.216806	-0.16388	-0.297183	-0.126828	-0.121023	-0.17436
553344	-0.0233788	-0.015616	-0.221305	-0.0652122	-0.0404566	0.00620152	-0.0201837	-0.00961424	-0.052356	-0.103584	-0.158124	-0.140936	-0.0608556	-0.121767	-0.196884	-0.0748512	-0.0911634	-0.0860178	-0.058805	-0.063929	-0.0973422	-0.0752405	-0.109649	-0.149065	-0.135849	-0.103889	-0.121197	-0.102632	-0.164395	-0.0436744	-0.103948	-0.184628	0.0155513	0.0775571	-0.0490008	-0.0633744	-0.146228	-0.179413	-0.0596096	-0.158786	0.0312162	-0.176781	-0.118962	-0.071262	-0.0943392	-0.0290684	-0.208627	-0.151622	-0.115303
555348	-0.0129259	-0.0311064	-0.0550466	-0.0877602	-0.060464	-0.0681448	-0.0538333	0.0210816	0.0249699	0.021973	-0.0659006	-0.107504	-0.00207732	-0.226035	-0.201502	-0.0558655	0.0116279	-0.135903	-0.0508816	-0.0109934	-0.0546102	-0.0874696	0.00748462	0.0181745	-0.0955415	0.0590769	-0.226275	-0.177492	-0.113202	-0.137861	-0.104181	-0.0580267	-0.176209	-0.140982	-0.112619	-0.0951891	-0.113924	-0.179433	-0.00424738	-0.0709433	0.037995	0.0434101	-0.0113765	-0.08383	-0.224327	-0.270349	-0.00859381	-0.0622128	-0.0275954
555651	-0.00481488	-0.109087	-0.0814329	-0.0964305	-0.118822	-0.15466	-0.0409745	0.0029571	0.0254358	0.0200276	-0.0639036	-0.0193843	-0.0747471	-0.0350785	-0.107863	-0.117973	-0.165129	-0.105847	-0.083294	-0.13464	-0.0630208	-0.102904	-0.140159	0.05223	-0.194072	-0.0254838	-0.17234	-0.0985429	-0.131331	-0.0766743	-0.000407744	-0.0794725	-0.0491361	0.0162955	-0.0586736	-0.00242523	-0.0117437	0.00626937	-0.0275525	0.0100759	0.0168891	-0.135341	0.0395257	-0.156457	-0.116491	-0.171772	-0.0886119	-0.0138041	-0.186388
555954	-0.171557	-0.0999445	-0.149641	-0.16217	-0.105628	-0.144363	-0.0427151	0.042702	0.0200816	-0.0737246	-0.166313	-0.191733	-0.0758623	-0.039627	-0.272563	-0.213089	-0.149565	-0.0904484	-0.147883	-0.175484	-0.12129	-0.137102	-0.000241195	-0.0612574	-0.216732	-0.226319	-0.164414	-0.0932057	-0.114289	-0.0345082	0.0680782	-0.0560968	0.130631	0.0361219	-0.125345	-0.0932058	-0.195648	-0.116282	0.038642	0.00744714	0.0118167	-0.129338	-0.245371	-0.272438	-0.181395	-0.222024	-0.163684	-0.194529	-0.207601
557857	-0.0459058	-0.00377171	-0.113881	-0.0488433	-0.0809101	0.000216217	0.033523	0.0358361	0.061174	-0.150552	-0.0746676	-0.332563	-0.0716886	-0.109527	-0.201976	-0.0532515	-0.115237	0.0607095	-0.0569413	-0.0361496	-0.0241713	-0.0389546	0.0372373	-0.0323045	-0.131273	0.120696	-0.066924	0.0144201	-0.117977	0.058807	-0.0947158	-0.165847	0.07282	0.0828711	0.0750537	-0.199282	-0.218811	-0.231319	-0.129546	-0.0370459	0.0330605	-0.0812684	-0.0203037	-0.233929	-0.280552	-0.349471	-0.226374	-0.157794	-0.14311
558657	-0.171982	0.0306955	-0.216842	-0.17949	-0.222931	-0.126396	0.0426609	-0.0425941	0.00154078	-0.182265	-0.0813975	-0.195027	-0.181386	-0.197918	-0.306383	-0.155922	-0.0225428	-0.0199926	-0.0957291	-0.11256	-0.0368381	-0.0410526	-0.0250301	-0.117417	-0.264195	-0.128031	-0.190709	-0.12445	-0.108056	0.0148039	-0.21441	-0.173232	0.0648482	0.0369506	-0.159995	-0.176783	-0.27725	-0.370229	-0.0171796	-0.272965	-0.0871481	-0.0300014	-0.114657	-0.29891	-0.244666	-0.0875157	-0.0199354	-0.00268139	-0.0169045
558960	-0.011775	0.0632496	-0.287803	-0.0838017	-0.0240109	0.0025263	0.0603791	0.0183791	0.0118478	-0.400353	-0.197988	-0.365771	-0.112905	-0.208332	-0.37468	-0.143245	-0.173352	0.025984	-0.0667738	-0.0516913	-0.136015	-0.123185	-0.0164544	0.0392122	-0.178321	-0.0402835	-0.474002	-0.17945	-0.263691	-0.124607	-0.164324	-0.415799	-0.125877	-0.0951157	-0.216533	-0.0185399	-0.163349	-0.349137	-0.0416335	-0.0908139	-0.0597214	-0.0425387	-0.0261577	-0.219619	-0.264392	-0.2633	-0.319348	-0.180875	0.00268373
559053	-0.00196007	-0.0897339	-0.192086	-0.152769	-0.132602	-0.0791659	-0.159484	-0.0803455	-0.0734473	-0.061718	-0.0269413	-0.0505254	-0.141333	-0.0216181	-0.123799	-0.125368	-0.109202	-0.106129	-0.102183	-0.114737	-0.0848209	-0.0992293	-0.0973874	0.0182997	-0.0205765	-0.0465255	-0.0602598	-0.0467055	-0.00342248	-0.00794723	-0.0922341	-0.0296351	-0.0132984	0.0561336	-0.0293524	-0.125144	-0.0358753	-0.0439389	0.0266382	-0.0543983	-0.00250915	-0.0417422	-0.0182769	-0.0716172	-0.1061	-0.122491	-0.139172	-0.118093	-0.0832943
559457	-0.0149212	-0.0139936	-0.0308463	-0.00815443	0.00220921	-0.0271532	0.00620964	-0.0233436	0.0209604	-0.0955024	-0.0123559	0.0575607	0.0178638	-0.0355521	-0.159687	-0.0373176	-0.0967769	-0.0728421	-0.0547749	-0.0142755	-0.0277679	-0.0265096	0.0258651	0.0304852	-0.124861	0.0182034	-0.1397	-0.10788	-0.0820923	0.0368247	-0.0221971	-0.137134	0.0319977	-0.00549752	-0.044041	-0.120124	-0.135927	-0.161377	-0.0602183	-0.0591216	-0.0371737	-0.068193	-0.00642247	-0.141518	-0.13955	-0.0776399	-0.0469549	-0.0495442	-0.0907853
561242	-0.0454288	-0.122898	-0.0871496	-0.110796	-0.0899697	-0.0892796	0.0276382	-0.0831331	-0.0884148	-0.16981	-0.10592	-0.200725	-0.153196	0.0284207	-0.0465951	-0.10914	-0.178018	-0.246066	-0.10066	-0.0734081	-0.164226	-0.0820361	-0.164034	0.00176567	-0.157099	-0.175255	-0.0980909	-0.178264	-0.106707	-0.0105912	-0.0867414	-0.00103553	0.0651252	0.073574	0.038075	-0.109674	-0.172843	-0.106717	-0.0929258	-0.11865	-0.0512766	-0.110745	-0.134988	-0.205744	-0.224281	-0.137531	-0.152213	-0.169322	-0.15558
561444	-0.0267554	-0.0479897	-0.0619606	-0.0520868	-0.0713638	-0.0927643	-0.121336	0.00902783	0.035164	-0.104926	-0.128328	-0.0755783	-0.0674298	-0.119393	-0.162895	-0.113663	-0.0874238	-0.134132	-0.0539072	-0.0700619	-0.062734	-0.0547621	-0.034498	-0.0716841	-0.0392013	0.00225973	-0.226379	-0.196545	-0.150434	0.0136599	-0.0480869	0.00022937	0.0719043	0.0250217	-0.0907846	-0.0147823	-0.113119	-0.172697	-0.0303476	-0.0191577	0.0519393	-0.00962192	-0.0210593	-0.160473	-0.190107	-0.145404	-0.0640678	-0.00838422	-0.0489568
561949	-0.191222	0.0297087	-0.1364	-0.108355	-0.11399	-0.0443598	-0.0756738	0.0581697	0.0544253	-0.110861	-0.448667	-0.242517	-0.079066	0.0379618	-0.0623866	-0.187206	-0.229138	-0.127542	-0.136698	-0.0285535	-0.0353215	-0.117973	-0.080927	0.0290888	-0.383054	-0.281492	-0.257574	-0.150101	-0.0351462	0.0772647	0.077033	-0.244073	0.152471	-0.0412823	-0.0624854	-0.199394	-0.183374	-0.19751	0.000751533	-0.129927	0.0197304	0.00215404	-0.11627	-0.282021	-0.233793	-0.420228	-0.0443252	0.093506	-0.127012
562446	0.0196517	0.00138461	0.00790241	-0.0134255	-0.0586622	-0.0610208	0.0266771	0.0832785	0.144814	-0.0605467	-0.0893967	-0.0905486	-0.0303163	-0.184202	-0.164638	-0.0398539	-2.29562e-05	-0.0301143	-0.0172156	-0.0759578	-0.0152689	-0.0125002	0.118438	-0.109301	0.0502772	0.146454	-0.314573	-0.112354	-0.178244	-0.185036	-0.14645	-0.21926	-0.150869	-0.0720798	-0.171557	0.0285288	-0.0563696	-0.197217	0.100677	-0.0238571	0.0296586	0.0182745	0.128384	-0.187875	-0.0169675	-0.0949901	-0.168641	-0.0276601	-0.123143
565452	0.0706048	-0.0960923	-0.225716	-0.0635178	0.0222067	-0.013095	0.117601	-0.191917	-0.109866	-0.263896	-0.390291	-0.3386	-0.109491	-0.162662	-0.223223	-0.012968	-0.136149	0.0100771	-0.0265987	0.0237118	-0.0151112	-0.00908435	-0.220035	0.0175484	-0.0440738	-0.116244	-0.404078	-0.100758	-0.466277	-0.256358	-0.0897211	-0.129561	-0.153909	-0.114543	-0.0991548	-0.150084	0.0622928	-0.0652932	0.0726798	0.1229	0.0653538	0.00649052	0.119071	-0.112312	-0.29188	0.0184589	-0.0989032	0.0932452	0.203133
566454	0.0260324	-0.0284054	-0.0290834	-0.0423577	-0.0290285	-0.0238227	-0.0469201	0.0158755	-0.0203293	-0.195847	-0.236124	-0.207627	-0.00182664	-0.00236504	-0.133866	-0.0595278	-0.109934	-0.0551797	-0.0526695	-0.00312305	-0.016962	-0.0194466	-0.0945979	0.0265387	-0.237311	0.00388099	-0.19527	-0.228869	-0.144579	-0.0909757	-0.0545297	-0.0248484	0.0177807	-0.0145294	-0.0621159	-0.0667568	-0.0686499	-0.144047	-0.0632982	-0.116946	0.0206758	-0.133687	-0.0276826	-0.221699	-0.178607	-0.159323	-0.0608909	-0.131114	-0.136781
567052	0.0698336	-0.0432841	-0.324351	-0.0788977	-0.158459	-0.108435	-0.12978	0.0852906	0.106324	-0.25558	-0.420898	-0.436396	-0.0815847	-0.0281964	-0.309964	-0.144429	-0.101791	-0.0951823	-0.0412436	-0.110904	-0.0272302	-0.177859	0.0156348	-0.0322652	-0.316421	-0.0371216	-0.235574	-0.179079	-0.031944	0.00682651	0.0889592	-0.396882	0.106711	0.0171989	-0.131522	-0.278684	-0.104612	-0.365596	-0.0966549	-0.0282044	0.0323637	-0.151299	-0.14186	-0.350302	-0.274236	-0.318581	-0.28983	-0.0855338	-0.270771
567759	-0.115866	-0.0778384	-0.162814	-0.16911	-0.15537	-0.0948842	-0.140517	-0.0272253	-0.0396091	-0.251457	-0.196325	-0.218695	-0.17285	8.44534e-05	-0.0606047	-0.158137	-0.160163	-0.140882	-0.0803887	-0.107059	-0.0730485	-0.0693337	-0.093079	-0.0567564	-0.179171	-0.0776276	-0.0483511	0.207229	-0.0226933	0.214192	-0.043775	0.0571655	0.174025	0.206143	0.222956	0.0322705	-0.161015	-0.103825	-0.150114	-0.0877633	-0.0500023	-0.227347	-0.163241	-0.273381	-0.252478	-0.20169	-0.221577	-0.135452	-0.234615
567961	0.00839796	-0.0200948	-0.137469	-0.0773394	-0.0309449	-0.0527622	-0.00261129	-0.0695899	-0.077278	-0.25698	-0.272569	-0.280083	-0.104831	0.00296744	-0.00938114	-0.119418	-0.170666	-0.0597033	-0.12479	-0.0914159	-0.086431	-0.0434985	-0.0391301	-0.0687542	-0.248693	-0.272276	-0.1901	-0.237931	0.0331985	0.0373601	-0.0155127	-0.122016	0.0376764	0.0204261	-0.0475139	-0.310186	-0.254476	-0.321425	-0.156758	-0.107291	-0.020993	-0.132808	-0.15534	-0.319811	-0.396806	-0.338389	-0.108379	-0.0569442	-0.200442
568963	-0.0483117	-0.0642527	-0.131884	-0.102342	-0.122845	-0.0578676	-0.0676538	-0.0329881	-0.0574298	-0.194394	-0.0473265	-0.191486	-0.128529	-0.0889437	-0.0950374	-0.156166	-0.0913692	-0.11794	-0.101042	-0.123274	-0.074928	-0.0981979	-0.0652975	-0.0950646	-0.21892	-0.0395592	-0.232047	-0.117573	-0.118285	-0.0488706	-0.0958295	-0.0557223	0.0464228	-0.109485	-0.155027	-0.105783	-0.0532888	-0.174313	-0.0193325	-0.0788845	0.0275078	-0.0246854	-0.0297138	-0.150374	-0.173461	-0.151184	-0.0495342	-0.0890424	-0.0479666
570243	-0.109364	-0.0825519	-0.079679	-0.166146	-0.144284	-0.107311	-0.0745601	-0.0345813	-0.0460711	-0.107704	-0.192159	-0.214121	-0.123221	-0.0405816	-0.211835	-0.0993772	-0.160487	-0.143326	-0.0596185	-0.0686536	0.025695	-0.00292664	-0.0831121	-0.100176	-0.145793	0.0172667	-0.162096	-0.0570716	-0.252523	0.0154498	-0.139504	0.0411083	0.0456641	0.097397	-0.0889565	-0.176309	-0.0500899	-0.171376	-0.205386	-0.00421005	-0.0559742	-0.0542665	-0.0318217	-0.164366	-0.0879024	-0.124998	-0.224702	-0.19478	-0.113592
571144	-0.0230687	0.0662963	-0.116487	-0.0115684	-0.012875	-0.0570153	0.0120121	0.0985513	0.052651	-0.283068	-0.257125	-0.209338	-0.0489614	-0.138662	-0.228668	-0.0160557	0.0420449	-0.00111797	0.00417123	-0.0256769	-0.0205901	0.046111	0.0853136	-0.0537766	-0.273573	0.0104447	-0.0764819	-0.133235	-0.135654	-0.000502711	0.0049717	-0.237786	-0.0617679	-0.172363	-0.0584204	-0.104897	-0.105745	-0.158254	0.000837878	-0.0610955	-0.0292391	0.0806611	-0.0877389	-0.294873	-0.109119	-0.241931	-0.152494	-0.0445555	0.103034
572045	-0.0706761	0.0221511	-0.00361286	-0.0766029	-0.104537	-0.0768149	-0.0684321	0.0116239	0.0147852	-0.0641193	-0.064945	-0.158524	-0.0172854	-0.0112975	-0.0841766	-0.0113806	-0.0695866	-0.0248255	-0.020497	-0.0304727	-0.0166616	-0.0823542	0.00655423	0.00733289	-0.109014	0.0245158	-0.177789	-0.121207	-0.0631378	0.00159576	-0.0136261	-0.119888	0.0246105	0.0552793	-0.041071	-0.0488647	-0.0897576	-0.144662	-0.00586396	-0.0633969	-0.00913003	0.00882453	-0.055556	-0.107905	-0.17893	-0.174586	-0.0953364	-0.0242539	-0.133381
573249	-0.116445	0.0351226	-0.101364	-0.056185	-0.119452	-0.0603951	-0.0537777	0.132185	0.136838	-0.275483	-0.201115	-0.170653	-0.103315	-0.0303881	-0.313048	-0.148209	-0.07145	-0.0117747	-0.106518	-0.067008	-0.0285511	0.023994	0.0968545	-0.0336258	-0.329251	-0.191414	-0.0645921	-0.133407	-0.289702	0.0387429	-0.0074695	-0.17788	0.141795	0.119501	-0.00512625	-0.0101898	-0.290337	-0.358999	0.0664967	-0.124118	-0.0515622	-0.0903046	-0.14151	-0.225464	-0.196368	-0.208398	-0.252106	-0.16244	-0.0496571
573451	-0.149666	0.0213607	-0.1252	-0.14262	-0.125558	-0.0581996	-0.0360451	0.0495858	0.0609221	-0.119543	-0.100111	-0.129278	-0.0778179	-0.196562	-0.218751	-0.0477442	-0.100018	-0.0420493	-0.0218261	-0.0825966	-0.0348839	-0.100282	0.0334417	-0.0397049	-0.175124	-0.152561	-0.120272	0.0111267	-0.145086	0.0125442	-0.0812556	-0.18398	-0.0258334	-0.0467772	-0.11484	-0.170797	-0.103742	-0.221869	0.0221997	-0.0502355	0.0537032	0.0297529	-0.0317564	-0.167301	-0.0423819	-0.00351847	-0.0376951	-0.0413863	0.0255658
576255	-0.162656	0.0138955	-0.202838	-0.212532	-0.153869	-0.0953985	-0.0280333	-0.0280806	-0.0206378	-0.180731	-0.0285114	-0.113949	-0.168562	-0.152032	-0.18397	-0.120698	-0.103696	0.00980798	-0.0932071	-0.0408449	-0.0757854	-0.131679	-0.0478649	-0.0590768	-0.0332556	-0.0723542	-0.100608	-0.139794	-0.0702872	-0.1074	-0.13913	-0.0698716	0.0343595	-0.0871437	-0.151924	-0.0345334	0.00526662	-0.0255643	0.0674744	-0.0466084	0.000461829	-0.187916	0.0189781	-0.0805316	-0.0631	-0.167993	-0.104579	-0.0819713	-0.207879
578057	0.00770609	-0.12191	-0.228527	-0.0818538	-0.132365	-0.0618026	-0.00771954	0.00541949	-0.00845667	-0.402478	-0.386301	-0.157308	-0.182989	-0.0321212	-0.241006	-0.207477	-0.160295	-0.142393	-0.124333	-0.084507	-0.0637445	-0.0846313	-0.118659	-0.152362	-0.180843	-0.152081	-0.278064	-0.216314	-0.0484631	0.00543785	-0.016677	-0.247526	0.0984001	-0.000896942	-0.0538735	-0.223609	-0.228025	-0.383504	0.0151529	-0.218405	-0.109817	-0.215305	-0.193264	-0.362994	-0.291691	-0.342966	-0.227708	-0.200272	-0.200314
579665	-0.0594372	-0.0781534	-0.148979	-0.103853	-0.125702	-0.0460263	-0.0798301	-0.052908	-0.0560997	-0.183701	-0.0386789	-0.138562	-0.0823714	0.023889	0.000293461	-0.0829474	-0.0607392	-0.0574831	-0.0980665	-0.0130453	-0.0266251	-0.0330348	-0.0348884	-0.0231796	-0.0941379	-0.100532	-0.046985	-0.126362	-0.0407484	0.0449002	-0.0435963	0.0104639	0.0271569	0.0792052	0.0308366	-0.0307998	-0.0440569	-0.111968	-0.0489649	-0.0873498	-0.00108273	-0.0663052	-0.119905	-0.199189	-0.123258	-0.0706185	-0.125237	-0.0368066	-0.0903269
579867	-0.115491	0.0477434	-0.15913	-0.0894705	-0.0765778	0.0641302	0.0273318	0.161854	0.163699	-0.103139	-0.121536	-0.0626984	-0.0758021	-0.219657	-0.298811	0.00820241	0.019469	0.101095	0.0587772	0.0655326	0.0732601	0.112274	0.0310008	0.0283958	-0.308438	-0.189239	-0.263741	-0.227886	-0.163399	0.0130186	-0.0455656	-0.369831	0.028162	-0.0901576	-0.242167	-0.162873	-0.153729	-0.332235	0.0417445	-0.151505	-0.0241802	-0.0321135	-0.167914	-0.227685	-0.21054	-0.243253	-0.123673	-0.090872	-0.06488
580044	-0.0233989	-0.0750547	-0.104905	-0.045098	-0.0673734	-0.0606582	-0.0940501	-0.0569335	-0.0487414	-0.118435	-0.110991	-0.133367	-0.0824527	0.0432594	-0.0888485	-0.0879081	-0.106612	-0.0922304	-0.0689296	-0.0902935	-0.126117	-0.0929077	-0.0996444	0.0939554	-0.0381562	-0.0770154	-0.0874491	0.00428788	-0.124275	-0.0317357	-0.0379972	0.0516955	0.00142564	0.0537917	0.0175819	0.0103447	0.0837054	0.029666	0.0305331	-0.0333242	-0.017838	-0.0491638	-0.0621532	-0.219366	-0.0244387	-0.0650555	-0.0423717	-0.0377593	-0.018661
580347	-0.00498115	-0.132249	-0.0841149	-0.0891317	-0.0624017	-0.0471199	-0.0405064	-0.0213579	-0.0129656	-0.0170917	-0.0943959	-0.0525756	-0.0830494	-0.0415015	-0.0116927	-0.0685495	-0.0519924	-0.0811077	-0.0259851	-0.0318182	-0.120326	-0.100843	-0.112215	0.0111766	-0.111986	-0.0186034	-0.10785	-0.124269	-0.0222188	0.0319221	0.0371051	-0.0368615	0.0471832	0.033339	0.031384	-0.0525805	0.00102017	-0.0271213	0.00435459	-0.0431822	0.0249601	-0.0254314	-0.0105506	-0.0790053	-0.050266	-0.018093	-0.0417742	-0.0433563	0.0198008
580650	-0.0911766	-0.0150482	-0.251126	-0.100192	-0.0874366	-0.0572349	-0.0710972	0.0690468	0.0397514	-0.262847	-0.0115282	-0.212526	-0.105133	-0.167886	-0.208577	-0.207746	-0.190455	-0.0754629	-0.093399	-0.125914	-0.00054731	-0.0410256	0.00992711	-0.0164044	-0.229106	-0.0101174	-0.224747	-0.115407	-0.116235	-0.0546895	-0.15753	-0.0959959	-0.0957013	-0.0871467	-0.126699	-0.102033	-0.229539	-0.264933	-0.049753	-0.000693218	0.0411903	-0.022686	-0.021825	-0.18409	-0.18754	-0.228133	-0.107189	-0.0207059	-0.180876
580751	-0.0250144	0.0185636	-0.104489	-0.0701388	-0.0457984	-0.0457793	-0.0653443	0.0736108	0.0850328	-0.0540138	0.0383489	-0.00634014	-0.0341493	-0.1244	-0.19414	-0.0459069	-0.0510815	-0.0828572	-0.042241	-0.0682114	-0.053313	-0.0564005	-0.050185	-0.0127983	0.0186812	-0.0537378	-0.176049	0.0857114	-0.000292181	-0.035286	0.0174192	-0.175033	-0.0409074	-0.11452	-0.13419	0.0132138	-0.142886	-0.14167	0.0552136	0.0761577	0.0216554	-0.00115396	0.0117727	-0.108007	0.000686351	-0.0209899	0.0166883	-0.0133869	0.00160468
581349	0.0160303	-0.0481669	-0.02152	0.0236826	-0.00104305	-0.00386172	-0.0334277	0.0266024	0.0339138	-0.0379857	-0.0858485	-0.0366115	0.0259645	-0.0361749	-0.0860179	0.0189735	0.00060815	-0.0858872	0.00243143	-0.0107937	-0.101751	-0.0361466	-0.0667867	0.0425066	-0.0961679	-0.0164654	-0.0710001	-0.040657	-0.0304231	-0.0538533	-0.0412067	-0.0103999	-0.05713	0.0146084	-0.0312829	-0.0278478	-0.0446366	-0.0812628	0.00838096	-0.00380295	0.0308403	0.00118135	0.0111854	-0.0312579	-0.05398	-0.0215458	0.0431019	-0.0196114	0.0110525
581450	-0.00495843	-0.0556094	-0.0329678	-0.0379636	-0.0792563	-0.0397715	-0.047194	-0.13199	-0.14007	-0.044587	-0.0425705	-0.0725966	-0.0642587	-0.00154719	-0.0040152	-0.126164	-0.128723	-0.110903	-0.0874141	-0.0804837	-0.0199639	-0.00117944	-0.087623	0.00369464	0.0145827	-0.0218594	-0.111497	-0.116874	-0.0655973	-0.00369281	-0.0205714	0.0689033	0.0735939	-0.0086623	-0.0583783	-0.127512	-0.0673334	-0.0168815	-0.119058	-0.0912218	-0.0730642	-0.12203	-0.0497711	-0.108014	-0.044399	-0.0950346	-0.189205	-0.138774	-0.108913
583858	-0.131786	0.00201851	-0.0973303	-0.108797	-0.151858	-0.116907	-0.127999	-0.0701969	-0.0272195	-0.143096	-0.0479164	-0.0649985	-0.0965124	-0.0357834	-0.0379582	-0.129773	-0.0844111	-0.179012	-0.0845386	-0.0680461	-0.0871568	-0.12295	0.0322554	-0.0649112	-0.0677351	-0.0808633	-0.0869681	-0.0539682	-0.104411	0.00416632	-0.00209235	-0.0632333	0.0238924	-0.00610488	-0.0172349	-0.122519	-0.195338	-0.234649	0.000939832	-0.137283	-0.0574899	-0.057888	-0.0311834	-0.0319868	-0.0694324	-0.0694361	-0.0440206	-0.101289	-0.124124
585256	-0.0352165	-0.0201796	-0.112874	-0.0745007	-0.0260546	0.0214813	0.0317355	-0.0317992	-0.0507791	-0.0519574	0.0187309	-0.00577528	-0.054578	-0.0878114	-0.104313	-0.00245774	0.0306432	-0.0917233	0.0713384	-0.0367542	-0.0429086	-0.0314134	-0.0540525	0.00987582	-0.116114	-0.0326005	-0.085269	-0.149039	-0.0433552	-0.099641	-0.0716899	-0.0442346	-0.0741709	-0.0461895	-0.0725174	-0.0117517	-0.0199941	-0.0599436	-0.0166631	-0.0331836	-0.0465991	0.00458614	0.022156	-0.0895024	-0.0373839	-0.0453696	-0.0359874	0.0125833	0.037986
585862	-0.117882	0.0146583	-0.125965	-0.056368	-0.0545179	-0.0299868	0.109936	0.195043	0.214305	-0.0370078	-0.167629	-0.46104	-0.0708534	-0.127388	-0.364875	-0.139231	-0.144087	-0.0156334	-0.0501257	-0.156547	-0.110261	-0.0181986	0.209585	0.0399317	-0.141061	-0.278581	-0.18031	-0.0658469	-0.296285	-0.0792817	0.0974036	-0.227944	0.0733372	-0.208313	-0.231724	0.0494301	-0.27455	-0.368037	0.105816	-0.0796213	0.124159	0.185656	-0.127004	-0.456811	-0.185043	-0.267322	-0.220348	0.151785	0.0165422
586460	-0.24892	0.101705	-0.209923	-0.178482	-0.264788	-0.139243	-0.104284	0.232039	0.125957	-0.379128	-0.431554	-0.537222	-0.276867	-0.131871	-0.519175	-0.0785574	-0.242149	-0.13199	-0.0737519	-0.199232	0.0917341	0.0889767	0.13064	-0.0816909	-0.532778	0.0381141	-0.542288	-0.357927	-0.421006	0.0608367	-0.159367	-0.422755	0.102704	-0.160309	-0.450975	-0.0922577	-0.123285	-0.35196	-0.147867	-0.10501	0.0200406	-0.211795	-0.266432	-0.521227	-0.360434	-0.388628	-0.0470825	0.114296	0.0690597
587664	0.0499345	-0.0250957	-0.08394	-0.0341096	-0.0670019	-0.0666695	-0.0303444	-0.0718129	-0.0687318	0.0132931	-0.0660003	-0.100456	0.0794357	-0.00387517	-0.0242626	-0.0618658	-0.106078	-0.0934035	0.0242346	-0.00454778	-0.0572659	-0.0919574	-0.0190419	-0.0459129	-0.0349555	-0.00509306	-0.0593011	-0.0549125	-0.0396183	-0.0364044	-0.0465629	-0.0614446	-0.0067374	-0.0616578	-0.0621861	-0.0718951	-0.0286441	0.00333717	0.0343739	-0.0122803	-0.0217971	0.0559714	0.00252905	0.0180076	-0.0351956	-0.0491515	-0.0879225	0.0153565	0.0401211
588565	-0.0033902	0.0876705	-0.288002	0.0251811	-0.0284455	-0.120701	-0.0837536	0.11103	0.161515	-0.271479	-0.380601	-0.37079	-0.127521	-0.0419944	-0.322034	-0.116766	-0.0216178	-0.11739	-0.086986	-0.239822	-0.151922	-0.290371	0.0226555	-0.0236715	-0.360599	-0.123286	-0.414827	-0.394506	-0.0569774	0.0607876	0.202253	-0.36012	0.0412163	-0.0478995	-0.245659	-0.135502	-0.0769028	-0.287255	0.141887	-0.108295	0.0449094	0.132345	0.0506878	-0.227459	-0.246053	-0.373572	-0.029784	0.0792045	0.0638027
589567	-0.0429871	-0.0636826	-0.0626284	-0.0713556	-0.0769877	-0.0734148	-0.0811327	-0.0263787	-0.0517151	-0.136442	-0.107405	-0.0652164	0.0281971	-0.0302716	-0.0490259	-0.035432	-0.023866	-0.0926232	-0.104676	-0.0529398	-0.142085	-0.0611582	-0.0673098	0.0418336	-0.00296893	-0.051162	-0.139693	-0.0877162	0.00411604	0.00148417	-0.0687453	0.0109112	0.052016	0.0463123	-0.0519918	-0.0434137	-0.0522665	-0.0861573	-0.0160998	-0.032665	-0.0214027	-0.000342974	-0.02265	-0.156883	-0.0851433	-0.0188464	0.00486554	-0.0423448	0.0159234
590047	0.0725605	-0.0610418	-0.0161363	-0.00293749	-0.06988	-0.0668598	-0.0523521	-0.0829204	-0.100292	-0.191877	-0.0753207	-0.286607	-0.026273	0.0701255	-0.040913	-0.0817536	-0.128951	-0.133422	-0.0374944	-0.112895	-0.0614393	-0.0610779	-0.0500993	0.00937947	-0.279503	-0.31009	-0.122182	-0.200539	-0.198398	-0.0595826	0.0316789	-0.0544318	-0.0117461	-0.0328774	-0.0814067	-0.00447447	-0.00841898	0.0235845	-0.048076	-0.0392883	-0.0240616	-0.156505	-0.123616	-0.111558	-0.15364	-0.20613	-0.227444	-0.169685	-0.146638
592455	-0.200552	-0.148056	-0.194606	-0.220763	-0.1995	-0.144783	-0.0273812	0.123367	0.117293	-0.167868	-0.201957	-0.170044	-0.173852	-0.0473458	-0.237894	-0.173665	-0.111007	-0.0733673	-0.0854792	-0.15849	-0.0714385	-0.174965	0.0549361	0.0700325	-0.222853	0.0534286	-0.0190164	-0.022852	0.0232324	0.122785	-0.0319619	-0.177047	0.136127	-0.0323398	-0.0964778	-0.0915565	-0.117923	-0.238254	0.015826	-0.0524858	-0.0614183	-0.0425028	-0.213679	-0.182082	-0.148011	-0.180429	-0.168832	-0.106781	-0.168708
594156	-0.0468322	-0.0848424	-0.161856	-0.128465	-0.117718	-0.0997452	-0.148609	-0.0322836	-0.0490288	-0.115954	-0.0768701	-0.174009	-0.0691359	-0.0664876	-0.143239	-0.110729	-0.137459	-0.170487	-0.128103	-0.111957	-0.111255	-0.108337	-0.0724958	-0.0526074	-0.117135	-0.0185586	-0.192979	-0.143605	-0.0872391	0.0503051	0.00946853	-0.0568697	0.058223	-0.00384993	0.0477498	-0.178167	-0.141693	-0.125124	-0.076639	-0.199128	-0.00351715	-0.10233	-0.00896661	-0.171684	-0.21688	-0.186115	-0.16249	-0.131392	-0.160796
597869	-0.000179302	-0.122405	-0.222793	-0.0457769	-0.0850082	-0.117509	-0.100763	-0.0796589	-0.0627274	-0.138066	-0.190284	-0.0792605	-0.148285	0.0479889	-0.0793162	-0.14272	-0.103648	-0.101248	-0.155891	-0.0763942	-0.0698423	-0.110032	-0.211175	0.0329048	-0.0463812	-0.0875625	-0.0622139	-0.0605102	-0.052737	-0.0481161	0.0522999	0.0145987	0.0235409	0.00661848	-0.0531492	-0.0907341	-0.0775452	-0.0433212	-0.0894578	-0.0952491	-0.00834517	-0.241408	-0.0924228	-0.153505	-0.135607	-0.195802	-0.123251	-0.168545	-0.297512
598568	-0.0910688	0.00100262	-0.120458	-0.0760263	-0.0620276	-0.0524284	-0.095734	-0.0350735	-0.0608666	-0.0787415	-0.0957447	-0.102697	-0.0396868	-0.0594141	-0.0951403	-0.0632218	-0.0562117	-0.0860352	-0.0670126	-0.0578738	-0.0765769	-0.101571	-0.0525765	-0.0758051	-0.139781	-0.0360015	-0.0883646	-0.0443316	-0.0137439	0.0298041	-0.0368583	-0.0609525	0.0245012	0.0217114	0.00219136	0.0103672	0.00605943	-0.027339	0.0045045	-0.0276531	-0.0210261	0.0296008	-0.0312342	-0.111446	-0.012744	-0.0958609	-0.0960044	-0.0847618	-0.00693104
599065	-0.16203	0.0485239	-0.420807	-0.278447	-0.232437	-0.171904	-0.121291	-0.0320006	0.00634789	-0.33572	-0.493472	-0.478465	-0.261843	0.0541233	-0.161795	-0.237079	-0.188723	-0.232496	-0.206406	-0.149761	-0.118341	-0.0984345	-0.106734	-0.0403273	-0.563087	-0.258301	-0.39253	-0.416544	-0.234587	0.108436	0.104191	-0.443086	0.227355	0.166633	0.143124	-0.150289	-0.370203	-0.438744	-0.089118	-0.224293	0.024778	-0.271044	-0.233274	-0.514901	-0.371367	-0.304293	-0.0802639	-0.274688	-0.140237
599469	0.14562	0.0293648	-0.159219	0.0366955	0.0647602	-0.0416857	-0.0669841	0.0180576	-0.0229126	-0.0709775	-0.00271356	-0.181807	0.052197	-0.122713	-0.336885	-0.0123035	-0.0497858	-0.130018	0.00418877	0.0508279	-0.0870163	-0.0162328	0.0871912	0.106694	-0.438596	-0.274081	-0.306115	-0.356918	-0.215022	-0.188308	-0.0314541	-0.235026	-0.0894366	-0.151036	-0.209605	-0.202552	-0.185811	-0.424235	0.0130126	-0.18701	0.0583208	0.122549	-0.0653694	-0.28199	-0.163199	-0.161039	-0.0469898	0.0788941	0.168457
599671	0.0550796	-0.0450645	-0.129818	0.0796227	0.0473409	0.0224481	0.0355287	0.0192537	0.00127425	-0.130478	-0.0765759	-0.122847	0.034532	-0.0319663	-0.131125	-0.0250418	-0.0554347	-0.0355663	-0.0114992	0.0182107	0.0272605	-0.0348032	-0.0430722	0.0384881	-0.184432	0.0108774	-0.117366	-0.163369	-0.0681943	0.0143055	-0.0237102	-0.103811	-0.0295717	-0.00693412	-0.0378487	-0.000729506	-0.091047	-0.101032	-0.0715789	-0.029686	-0.0371888	-0.106314	-0.102246	-0.168153	-0.194394	-0.175441	-0.105441	-0.0826314	-0.132005
601127	-0.0179509	0.00189276	-0.163287	-0.0170236	-0.0226649	-0.0697392	0.00580274	-0.0329159	-0.0260302	-0.139011	-0.0128665	-0.143717	-0.0253628	-0.161634	-0.212696	-0.0785386	-0.089838	-0.0349153	-0.0878682	-0.0502407	-0.0241588	-0.0342335	-0.0666027	-0.0953374	-0.204751	-0.0604126	-0.222434	-0.140732	-0.202934	-0.00731386	-0.0944166	-0.144783	-0.0437465	0.0587122	-0.0101393	-0.208407	-0.172906	-0.218025	-0.188184	-0.137633	-0.0471067	-0.097851	-0.0869279	-0.248868	-0.246143	-0.288759	-0.13062	-0.0887144	-0.0850387
604537	0.05987	0.0189668	0.0265	0.0517881	0.0831923	0.0138431	0.0174952	0.0567204	0.0796676	-0.0296358	-0.079598	0.0208194	0.0658355	-0.0404511	-0.0282745	0.0504253	-0.103664	0.0608324	0.0623421	-0.00439622	0.0320124	0.0259658	-0.0925593	0.109703	-0.10189	-0.241897	-0.172077	-0.112904	-0.0885745	-0.0215522	-0.037377	-0.113727	-0.0197054	-0.0165815	-0.0425606	-0.0305402	-0.0475769	-0.133069	-0.000390298	0.022042	0.018988	-0.0895246	0.10293	-0.122113	-0.221219	-0.145204	-0.19353	-0.136753	-0.151187
611938	-0.0339808	-0.0297811	-0.172686	-0.159809	-0.116353	-0.0109072	-0.00382912	-0.0134146	0.0188469	-0.229113	-0.182099	-0.228812	-0.0472421	-0.0966968	-0.215486	-0.110823	-0.250535	-0.0248161	-0.0466522	0.0207252	0.028104	-0.00186082	-0.0343775	0.0588457	-0.192344	0.00576456	-0.202211	-0.176077	-0.191682	-0.0623915	-0.0609675	-0.0456122	-0.0336067	-0.0080084	-0.0325947	-0.120217	-0.140194	-0.137698	-0.0333425	-0.0198681	0.0297902	-0.124383	-0.0824589	-0.177396	-0.241567	-0.161641	-0.083812	-0.0553325	-0.224819
613538	0.00747098	-0.0585708	-0.0574776	-0.0333924	-0.0353174	-0.0377587	-0.0646682	-0.07797	-0.060377	-0.0376041	-0.022818	-0.03449	-0.0154024	-0.0999507	-0.0600827	-0.0192107	-0.0920852	-0.105258	-0.0216416	-0.0156373	-0.0465686	-0.0361044	-0.0981671	-0.00289411	0.0561114	-0.0600021	0.0724337	-0.0737311	-0.0383897	-0.113989	-0.0965247	-0.0399524	-0.118142	-0.0658246	-0.0340633	-0.0496818	0.0247823	0.0109469	-0.0415409	-0.0557313	-0.0270837	-0.0589391	-0.0227637	-0.0920712	-0.00508335	-0.0137258	-0.0563196	-0.0351668	-0.029821
614439	-0.0681396	-0.0202598	-0.0129826	-0.0260308	-0.0273354	-0.051783	-0.0673936	-0.0293219	-0.00682708	-0.0932844	-0.122435	-0.0160346	-0.00758626	-0.0509098	-0.0311418	-0.041848	-0.0975654	-0.0455826	-0.0369411	-0.0835071	-0.059475	-0.0527514	-0.0353944	-0.0772757	-0.00481548	0.00293799	-0.00887952	-0.0973587	-0.0237856	0.0214979	-0.047406	-0.0500995	0.00536317	-0.030573	-0.0487555	0.0060436	0.0159503	-0.0284918	0.0325826	0.0201153	0.00609641	-0.0105151	0.025123	-0.17399	-0.0545297	-0.135959	-0.0305236	-0.146106	-0.0440416
615441	-0.127762	0.042045	-0.133777	-0.148313	-0.0859968	-0.033079	-0.0818787	0.0782543	0.107662	-0.0957451	-0.100027	-0.152207	-0.0779528	-0.104193	-0.133541	-0.0558752	0.00272011	-0.0181291	-0.0484558	-0.0506514	0.011803	-0.0379369	0.0237333	0.0468575	-0.0204643	-0.0676546	-0.0786171	-0.0374041	-0.0684378	-0.0220371	-0.0905735	-0.0558941	-0.040861	-0.0177627	-0.0638005	0.0545614	0.0260961	-0.0676748	0.118685	0.0805333	-0.00677739	0.0191393	0.00745801	-0.0310341	-0.0245593	-0.0442062	0.0144583	-0.0463256	0.0264305
615744	-0.322579	-0.0888621	-0.364416	-0.34296	-0.31738	-0.224075	-0.320471	0.0867526	0.0474061	-0.389593	-0.217243	-0.244823	-0.371417	0.176555	-0.0206519	-0.303501	-0.313776	-0.253093	-0.28784	-0.194305	-0.172883	-0.284714	-0.0147697	0.0623101	-0.34755	-0.0448624	-0.218036	-0.217183	0.158564	0.277248	0.211301	0.0214933	0.17123	0.068116	-0.174407	-0.217583	-0.346776	-0.335824	0.0110593	-0.10599	-0.0522113	-0.286255	-0.365054	-0.495261	-0.44167	-0.362373	-0.370516	-0.313451	-0.344371
616645	0.022114	-0.038697	-0.18883	-0.0963272	-0.232096	-0.251952	-0.202488	0.132917	0.150711	-0.149794	-0.129499	-0.209341	-0.11221	-0.198124	-0.312021	-0.237604	-0.0160729	0.0553324	-0.1451	-0.174295	-0.153583	-0.184332	-0.022333	-0.00340589	-0.140201	-0.0760903	-0.261965	-0.068777	-0.0848742	-0.137502	-0.163436	-0.360185	-0.0339194	-0.230281	-0.32895	-0.122799	-0.0504635	-0.147416	-0.0949077	-0.0850755	0.0229779	-0.210593	-0.132671	-0.126431	-0.211705	-0.0179344	-0.142963	-0.125794	-0.304904
617748	-0.252478	0.0210722	-0.219469	-0.172689	-0.128642	-0.103555	0.0359998	-0.0249122	0.0297203	-0.31252	-0.459243	-0.566456	-0.113161	-0.0463035	-0.115478	-0.182837	-0.190868	-0.0962487	-0.182637	-0.0797371	-0.161055	-0.108458	-0.0804772	-0.135018	-0.371648	-0.145501	-0.332175	-0.342505	0.059342	0.204692	-0.0259873	-0.0698712	0.214214	0.0170911	0.00940611	-0.0654852	-0.150802	-0.206091	0.0343609	-0.154728	-0.086516	-0.102851	-0.376731	-0.42073	-0.265159	-0.204435	-0.129302	-0.133264	-0.191436
618952	-0.0336475	-0.0390102	-0.119682	-0.0866988	-0.0719998	-0.0271428	0.0163423	-0.000707731	0.0246977	-0.118125	-0.0467361	-0.0792165	-0.0826351	-0.0486205	-0.182601	-0.0693181	-0.0366418	-0.0610838	-0.0902407	-0.0424424	-0.0657995	-0.0127914	-0.0363131	0.0466603	-0.0532237	-0.0567704	-0.125227	-0.026803	-0.17235	-0.0413239	-0.0219273	-0.119244	0.0887918	-0.0113354	-0.07807	-0.0673131	-0.160717	-0.292751	-0.00398062	-0.0175279	0.000941589	-0.0415109	-0.040013	-0.233665	-0.146476	-0.0616984	-0.0603745	0.0381853	-0.0324234
620434	-0.135953	-0.00660067	-0.111051	-0.145251	-0.168934	-0.15038	-0.0951963	0.00056405	-0.023323	-0.219817	-0.147328	-0.170508	-0.0499365	-0.015779	-0.16988	-0.0558859	-0.0887265	-0.090574	-0.0994966	-0.111098	-0.0593411	-0.0885544	-0.0489254	-0.170128	-0.188484	-0.0633406	-0.0477225	-0.132394	-0.099913	0.0183685	-0.012246	-0.0634935	0.0880626	-0.017639	-0.0310398	-0.0564418	-0.157689	-0.198983	-0.033332	-0.0228394	0.0158701	-0.0547039	-0.126462	-0.192941	-0.195838	-0.161148	-0.106114	-0.0830608	-0.109791
622236	-0.136609	0.0388597	-0.439035	-0.171841	-0.300212	-0.227164	0.0218739	0.0234128	0.129937	-0.368703	-0.186762	-0.237214	-0.326339	-0.214513	-0.459523	-0.205539	-0.131616	-0.150354	-0.180505	-0.176663	-0.119235	-0.415911	-0.0471292	0.0986211	-0.401811	-0.212379	-0.337728	-0.344107	-0.368526	0.035267	-0.0874597	-0.268609	0.192724	-0.151143	0.0113253	-0.148417	-0.379838	-0.456784	0.0588277	-0.0761503	0.164233	-0.171735	-0.072767	-0.29287	-0.47806	-0.0739195	-0.0956619	-0.122895	-0.515724
623844	0.0373533	0.0545703	-0.178343	0.0631123	0.0760642	0.0790918	0.0813644	0.101603	0.0744206	-0.117982	-0.0241364	-0.218322	-0.00514788	-0.250173	-0.326995	0.0391834	-0.0672497	-0.0216804	0.0681483	0.00263164	0.0320823	0.063579	-0.0717849	-0.072465	-0.31628	-0.182299	-0.266912	-0.104172	-0.271096	-0.0874654	-0.0933323	-0.338135	-0.144627	-0.216009	-0.179598	0.0332182	-0.157692	-0.262779	-0.098805	0.037906	0.0580374	-0.00920091	-0.0550228	-0.280509	-0.147265	-0.143195	-0.256811	-0.118743	-0.0731192
626648	-0.156939	-0.151727	-0.568334	-0.199397	-0.282495	-0.283211	-0.0785803	-0.029243	0.0146049	-0.284554	-0.199566	-0.435715	-0.284767	0.0485453	-0.334812	-0.215285	-0.195015	-0.188925	-0.147565	-0.217589	-0.235781	-0.289952	-0.125907	-0.00455448	-0.291131	0.0160549	-0.447861	0.0184256	-0.198598	-0.0342229	0.0327463	-0.168312	0.122294	-0.126797	-0.232359	-0.204567	-0.216845	-0.291065	-0.0749046	-0.136162	0.0437291	-0.000888105	-0.175431	-0.260645	-0.226489	-0.362552	-0.0524892	0.0300027	-0.0600975
[truncated: 223 more rows]
[truncated: 311 more columns]
